# Supplementary material
Source: publisher figshare collection journal article supplement (https://geolsoc.figshare.com/ndownloader/files/21621423)
Supplement: Supplementary file 1 [file 21621423]

## Sheet: Sheet1
ID1 *	OBJECTID_12__	Shape *	ID	Parent_ID	GeographicRegion	Name	Aliases	SlideType	ObjectType	DepthBelowSeafloor_m	DepthBelowSeafloor_TWTT	Latitude_Centrepoint	Longitude_Centrepoint	WaterDepth_Min	WaterDepth_Max	TotalLength_Lt	DepositLength_Ld	EvacuatedLength_Le	LengthNotes	ScarpPerimeterLength_Ls	ScarpHeight_Hs	EvacuatedHeight_He	TotalHeightDrop_Ht	ScarpWidth_Ws	ScarpSurfaceNature	MaxDepositWidth_Wd	MaxDepositThickness_Tdmax_m	MaxDepositThickness_TWTT_Tdmax	MaxUnconfinedDepositThickness_Tumax_m	MaxUnconfinedDepositThickness_TWTT_Tumax	ThicknessNotes	SlopeGradient_S	SlopeGradientNotes	SlopeGradientHeadscarp_Ss	SlopeGradientHeadscarpNotes	SlopeGradientToe_St	SlopeGradientToeNotes	BasalSurfaceType	UpperSurfaceType	Volume_km3	VolumeNotes	AgeYears	AgeError	AgeNotes	SeafloorFeatures	DataType	DataTypeNotes	DataSource	DataRepositories
1	1	Point	<Null>	<Null>	Canada East Coast	Canada East Coast - West Levee of Western Laurentian Valley	West Leavee of Western Laurentian Valley Slide	Frontally confined	Single	0.45	<Null>	41.824	-56.253	4015	5045	120000	120000	0	Max length measured	538556	40	0	880	153750	<Null>	140000	30	0.04	<Null>	<Null>	Collected along one line crossing the MTD. Not precise	0.65	measured on 80 km, between 1 and 14 km from the landslide, in the downslope direction of the landslide	6.3	Taken at the same location as the scarp height. Gradient varies along the perimeter of the entire landslide. The headscarp gradient is variable.	0	<Null>	Mostly planar	Smooth	<Null>	<Null>	Holocene	<Null>	From stratigraphy, will have a better age in the next year	On the Laurentian Fan levee consisting of turbidite beds	Bathymetry and geophysics	<Null>	Atlantis 2012 cruise	Geological Survey of Canada - Atlantic
2	2	Point	<Null>	<Null>	Canada West Coast	Canada West Coast - Woodfibre Creek Delta Failure	Woodfibre -Howe Sound	<Null>	Single	0	<Null>	49.6638	-123.251	0	0	0	0	0	<Null>	0	0	0	0	0	<Null>	0	0	0	<Null>	<Null>	<Null>	0	<Null>	0	<Null>	0	<Null>	<Null>	<Null>	<Null>	<Null>	<Null>	<Null>	<Null>	<Null>	Literature review	<Null>	<Null>	<Null>
3	3	Point	<Null>	<Null>	Canada West Coast	Canada West Coast - Fraser River Delta Failure	<Null>	<Null>	<Null>	0	<Null>	49.0865	-123.311	<Null>	0	0	0	0	<Null>	0	0	0	0	0	<Null>	0	0	0	<Null>	<Null>	<Null>	0	<Null>	0	<Null>	0	<Null>	<Null>	<Null>	3000	<Null>	<Null>	<Null>	<Null>	<Null>	<Null>	<Null>	<Null>	Geological Survey of Canada - Pacific
4	4	Point	<Null>	<Null>	Canada West Coast	Canada West Coast - Kitimat Arm Failure 1975	<Null>	<Null>	<Null>	0	<Null>	53.9832	-128.692	119	0	0	0	0	<Null>	0	0	0	0	0	<Null>	0	0	0	<Null>	<Null>	<Null>	0	<Null>	0	<Null>	0	<Null>	<Null>	<Null>	26000	<Null>	<Null>	<Null>	<Null>	Fjord Seascapes - Submarine slide complex	<Null>	<Null>	<Null>	Geological Survey of Canada - Pacific
5	5	Point	<Null>	<Null>	Canada West Coast	Canada West Coast - Northern Cascadia_A	Northern Cascadia - Minke Slide	<Null>	Single	0	<Null>	48.25	-126.5	-2130	-2600	0	1300	0	<Null>	0	0	0	470	0	Rectangular headscrap	3300	0	0	<Null>	<Null>	<Null>	14.5	From publication -Intact ridge slope angle	0	<Null>	0	<Null>	<Null>	<Null>	0.452	Estimated average net-loss volumes, defined by the difference between bathymetry data and a virtual plane (reconstruction of failure before slide).		<Null>	<Null>	<Null>	Bathymetry EM300 Multibeam	<Null>	R/V Thompson 2002 cruise	Geological Survey of Canada - Pacific
6	6	Point	<Null>	<Null>	Canada West Coast	Canada West Coast - Northern Cascadia_B	Northern Cascadia - Seal Slump	<Null>	Single	0	<Null>	48.3333	-126.668	-1615	-2600	0	2200	0	<Null>	0	0	0	985	0	Circular headscrap	2500	0	0	<Null>	<Null>	<Null>	25	From publication -Intact ridge slope angle	0	<Null>	0	<Null>	<Null>	<Null>	0.76	Estimated average net-loss volumes, defined by the difference between bathymetry data and a virtual plane (reconstruction of failure before slide).		<Null>	<Null>	<Null>	Bathymetry EM300 Multibeam	<Null>	R/V Thompson 2002 cruise	Geological Survey of Canada - Pacific
7	7	Point	<Null>	<Null>	Canada West Coast	Canada West Coast - Northern Cascadia_C	Northern Cascadia - Pilot Slide	<Null>	Single	0	<Null>	48.45	-126.8	-2050	-2600	0	700	0	<Null>	0	0	0	550	0	Rectangular headscrap	2400	0	0	<Null>	<Null>	<Null>	12.8	From publication -Intact ridge slope angle	0	<Null>	0	<Null>	<Null>	<Null>	0.042	Estimated average net-loss volumes, defined by the difference between bathymetry data and a virtual plane (reconstruction of failure before slide).		<Null>	<Null>	<Null>	Bathymetry EM300 Multibeam	<Null>	R/V Thompson 2002 cruise	Geological Survey of Canada - Pacific
8	8	Point	<Null>	<Null>	Canada West Coast	Canada West Coast - Northern Cascadia_D_Slipstream	Northern Cascadia - Humpback Slide	<Null>	Single	0	<Null>	48.5	-127	-2100	-2600	0	2000	0	<Null>	0	0	0	500	0	Rectangular headscrap	3300	0	0	<Null>	<Null>	<Null>	9.5	From publication -Intact ridge slope angle	0	<Null>	0	<Null>	<Null>	<Null>	0.222	Estimated average net-loss volumes, defined by the difference between bathymetry data and a virtual plane (reconstruction of failure before slide).	Holocene	<Null>	<Null>	<Null>	Bathymetry EM300 Multibeam and geophysics	Piston core data-2008 PGC Tully Cruise	R/V Thompson 2002 cruise; PGC cruise, August 2008 Canadian Coast Guard Ship (CCGS) John P. Tully	Geological Survey of Canada - Pacific
9	9	Point	<Null>	<Null>	Canada West Coast	Canada West Coast - Northern Cascadia_E_Orca	Northern Cascadia - Orca Slump	<Null>	Single	0	<Null>	48.6	-127.042	-1720	-2600	0	2400	0	<Null>	0	0	0	880	0	Circular headscrap	2000	0	0	<Null>	<Null>	<Null>	16.5	From publication -Intact ridge slope angle	0	<Null>	0	<Null>	<Null>	<Null>	0.46	Estimated average net-loss volumes, defined by the difference between bathymetry data and a virtual plane (reconstruction of failure before slide).		<Null>	<Null>	<Null>	Bathymetry EM300 Multibeam	<Null>	R/V Thompson 2002 cruise	Geological Survey of Canada - Pacific
10	10	Point	<Null>	<Null>	Canada West Coast	Canada West Coast - Northern Cascadia_F	Northern Cascadia - Otter Slide	<Null>	Single	0	<Null>	48.625	-127.167	-2230	-2600	0	1200	0	<Null>	0	0	0	370	0	Rectangular headscrap	2000	0	0	<Null>	<Null>	<Null>	11.8	From publication -Intact ridge slope angle	0	<Null>	0	<Null>	<Null>	<Null>	0.128	Estimated average net-loss volumes, defined by the difference between bathymetry data and a virtual plane (reconstruction of failure before slide).		<Null>	<Null>	<Null>	Bathymetry EM300 Multibeam	<Null>	R/V Thompson 2002 cruise	Geological Survey of Canada - Pacific
11	11	Point	<Null>	<Null>	Canada West Coast	Canada West Coast - Northern Cascadia_G	Northern Cascadia - Dolphin Slump	<Null>	Single	0	<Null>	48.6458	-127.25	-1810	-2600	0	1400	0	<Null>	0	0	0	790	0	Circular headscrap	1800	0	0	<Null>	<Null>	<Null>	21.5	From publication -Intact ridge slope angle	0	<Null>	0	<Null>	<Null>	<Null>	0.151	Estimated average net-loss volumes, defined by the difference between bathymetry data and a virtual plane (reconstruction of failure before slide).		<Null>	<Null>	<Null>	Bathymetry EM300 Multibeam	<Null>	R/V Thompson 2002 cruise	Geological Survey of Canada - Pacific
12	12	Point	<Null>	<Null>	Canada West Coast	Canada West Coast - Northern Cascadia_H	Northern Cascadia - Dolphin Slump	<Null>	Single	0	<Null>	48.7167	-127.333	-2060	-2600	0	2000	0	<Null>	0	0	0	540	0	Rectangular headscrap	2000	0	0	<Null>	<Null>	<Null>	11.5	From publication -Intact ridge slope angle	0	<Null>	0	<Null>	<Null>	<Null>	0	Estimated average net-loss volumes, defined by the difference between bathymetry data and a virtual plane (reconstruction of failure before slide).		<Null>	<Null>	<Null>	Bathymetry EM300 Multibeam	<Null>	R/V Thompson 2002 cruise	Geological Survey of Canada - Pacific
13	13	Point	<Null>	<Null>	Canada West Coast	Canada West Coast - Explorer Plate_1	Explorer Plate_1	<Null>	<Null>	<Null>	<Null>	49.9554	-129.041	<Null>	<Null>	<Null>	<Null>	<Null>	<Null>	0	0	0	<Null>	<Null>	<Null>	<Null>	<Null>	<Null>	<Null>	<Null>	<Null>	<Null>	<Null>	<Null>	<Null>	<Null>	<Null>	<Null>	<Null>	<Null>	<Null>	<Null>	<Null>	<Null>	<Null>	Bathymetry EM300 Multibeam	<Null>	2013 SeaJade II Expedition on board CCGS John P. Tully cruise -2013007PGC	<Null>
14	14	Point	<Null>	<Null>	Canada West Coast	Canada West Coast - Explorer Plate_2	Explorer Plate_2	<Null>	<Null>	<Null>	<Null>	49.9148	-128.992	<Null>	<Null>	<Null>	<Null>	<Null>	<Null>	0	0	0	<Null>	<Null>	<Null>	<Null>	<Null>	<Null>	<Null>	<Null>	<Null>	<Null>	<Null>	<Null>	<Null>	<Null>	<Null>	<Null>	<Null>	<Null>	<Null>	<Null>	<Null>	<Null>	<Null>	Bathymetry EM300 Multibeam	<Null>	2013 SeaJade II Expedition on board CCGS John P. Tully cruise -2013007PGC	<Null>
15	15	Point	<Null>	<Null>	Canada West Coast	Canada West Coast - Explorer Plate_3	Explorer Plate_3	<Null>	<Null>	<Null>	<Null>	50.0186	-128.747	<Null>	<Null>	<Null>	<Null>	<Null>	<Null>	0	0	0	<Null>	<Null>	<Null>	<Null>	<Null>	<Null>	<Null>	<Null>	<Null>	<Null>	<Null>	<Null>	<Null>	<Null>	<Null>	<Null>	<Null>	<Null>	<Null>	<Null>	<Null>	<Null>	<Null>	Bathymetry EM300 Multibeam	<Null>	2013 SeaJade II Expedition on board CCGS John P. Tully cruise -2013007PGC	<Null>
16	16	Point	<Null>	<Null>	Canada West Coast	Canada West Coast - Explorer Plate_4	Explorer Plate_4	<Null>	<Null>	<Null>	<Null>	49.7035	-128.624	<Null>	<Null>	<Null>	<Null>	<Null>	<Null>	0	0	0	<Null>	<Null>	<Null>	<Null>	<Null>	<Null>	<Null>	<Null>	<Null>	<Null>	<Null>	<Null>	<Null>	<Null>	<Null>	<Null>	<Null>	<Null>	<Null>	<Null>	<Null>	<Null>	<Null>	Bathymetry EM300 Multibeam	<Null>	2013 SeaJade II Expedition on board CCGS John P. Tully cruise -2013007PGC	<Null>
17	17	Point	<Null>	<Null>	Canada West Coast	Canada West Coast - Explorer Plate_5	Explorer Plate_5	<Null>	<Null>	<Null>	<Null>	49.6964	-128.581	<Null>	<Null>	<Null>	<Null>	<Null>	<Null>	0	0	0	<Null>	<Null>	<Null>	<Null>	<Null>	<Null>	<Null>	<Null>	<Null>	<Null>	<Null>	<Null>	<Null>	<Null>	<Null>	<Null>	<Null>	<Null>	<Null>	<Null>	<Null>	<Null>	<Null>	Bathymetry EM300 Multibeam	<Null>	2013 SeaJade II Expedition on board CCGS John P. Tully cruise -2013007PGC	<Null>
18	18	Point	<Null>	<Null>	Canada West Coast	Canada West Coast - Explorer Plate Winona Basin_6a	Explorer Plate Winona Basin_6a	<Null>	<Null>	<Null>	<Null>	49.5377	-127.934	<Null>	<Null>	<Null>	<Null>	<Null>	<Null>	0	0	0	<Null>	<Null>	<Null>	<Null>	<Null>	<Null>	<Null>	<Null>	<Null>	<Null>	<Null>	<Null>	<Null>	<Null>	<Null>	<Null>	<Null>	<Null>	<Null>	<Null>	<Null>	<Null>	<Null>	Bathymetry EM300 Multibeam	Piston cores; 3.5 kHz ocean-bottom seisometer profiles during 2013 SeaJade II cruise	2013 SeaJade II Expedition on board CCGS John P. Tully cruise -2013007PGC	<Null>
19	19	Point	<Null>	<Null>	Canada West Coast	Canada West Coast - Explorer Plate Winona Basin_6b	Explorer Plate Winona Basin_6b	<Null>	<Null>	<Null>	<Null>	49.5074	-127.874	<Null>	<Null>	<Null>	<Null>	<Null>	<Null>	0	0	0	<Null>	<Null>	<Null>	<Null>	<Null>	<Null>	<Null>	<Null>	<Null>	<Null>	<Null>	<Null>	<Null>	<Null>	<Null>	<Null>	<Null>	<Null>	<Null>	<Null>	<Null>	<Null>	<Null>	Bathymetry EM300 Multibeam	Piston cores; 3.5 kHz ocean-bottom seisometer profiles during 2013 SeaJade II cruise	2013 SeaJade II Expedition on board CCGS John P. Tully cruise -2013007PGC	<Null>
20	20	Point	<Null>	<Null>	Canada West Coast	Canada West Coast - Explorer Plate_7	Explorer Plate_7	<Null>	<Null>	<Null>	<Null>	49.6325	-128.436	<Null>	<Null>	<Null>	<Null>	<Null>	<Null>	0	0	0	<Null>	<Null>	<Null>	<Null>	<Null>	<Null>	<Null>	<Null>	<Null>	<Null>	<Null>	<Null>	<Null>	<Null>	<Null>	<Null>	<Null>	<Null>	<Null>	<Null>	<Null>	<Null>	<Null>	Bathymetry EM300 Multibeam	<Null>	<Null>	<Null>
21	21	Point	<Null>	<Null>	Arctic Canada West	Arctic Canada West - Beaufort Sea Slump	<Null>	<Null>	<Null>	0	<Null>	70.6007	-136.073	0	0	0	0	0	<Null>	0	0	0	0	0	<Null>	0	0	0	<Null>	<Null>	<Null>	0	<Null>	0	<Null>	0	<Null>	<Null>	<Null>	<Null>	<Null>	<Null>	<Null>	Feature is an unknown age	<Null>	<Null>	<Null>	Amundsen 2004-804: Beaufort Sea / Amundsen Gulf / Northwest Passage, June 23 -August 27, 2004
22	22	Point	<Null>	<Null>	Arctic Canada East	Arctic Canada East - Baffin Bay - Scott Trough Slide	<Null>	<Null>	<Null>	0	<Null>	71.3469	-70.2499	0	0	0	0	0	<Null>	0	0	0	0	0	<Null>	0	0	0	<Null>	<Null>	<Null>	0	<Null>	0	<Null>	0	<Null>	<Null>	<Null>	<Null>	<Null>	<Null>	<Null>	<Null>	<Null>	<Null>	<Null>	<Null>	<Null>
23	23	Point	<Null>	<Null>	Great Lakes & St Lawrence	St Lawrence - Betsiamites - Lower St. Lawrence	1663 Betsiamite Failure	<Null>	<Null>	0	<Null>	48.8679	-68.6988	<Null>	-375	0	0	0	<Null>	0	0	0	0	0	<Null>	0	0	0	<Null>	<Null>	<Null>	0	<Null>	0	<Null>	0	<Null>	<Null>	<Null>	1.3	<Null>	<Null>	<Null>	<Null>	<Null>	<Null>	<Null>	<Null>	<Null>
24	24	Point	<Null>	<Null>	Canada East Coast	Canada East Coast - Grand Banks Failure	1929 Grand Banks Failure	<Null>	<Null>	0	<Null>	44.69	-56	0	0	0	0	0	<Null>	0	0	0	0	0	<Null>	0	0	0	<Null>	<Null>	<Null>	0	<Null>	0	<Null>	0	<Null>	<Null>	<Null>	200	Approximate volume	<Null>	<Null>	<Null>	<Null>	<Null>	<Null>	<Null>	<Null>
25	25	Point	<Null>	<Null>	Canada East Coast	Canada East Coast - Hopedale-Makkovik Failure Complex	Makkovik Failure	<Null>	<Null>	0	<Null>	56.4178	-57.4937	0	0	0	0	0	<Null>	0	0	0	0	0	<Null>	0	0	0	<Null>	<Null>	<Null>	0	<Null>	0	<Null>	0	<Null>	<Null>	<Null>	<Null>	<Null>	Piliocene Epoch	<Null>	Pliocene Epoch (5.333-2.58 MYA)	<Null>	<Null>	<Null>	<Null>	<Null>
26	26	Point	<Null>	<Null>	Canada East Coast	Canada East Coast - Flemish Pass_Core16	<Null>	<Null>	<Null>	0	<Null>	48.2936	-45.7697	1002	0	0	0	0	<Null>	0	0	0	0	0	<Null>	0	0	0	<Null>	<Null>	<Null>	0	<Null>	0	<Null>	0	<Null>	<Null>	<Null>	2.5	<Null>	~27ka years ago	<Null>	<Null>	<Null>	<Null>	<Null>	Nereida Project 2009-2010 on board Spanish vessel RV Miguel Oliver and during CCGS Hudson expedition 2011-031	Geological Survey of Canada - Atlantic
27	27	Point	<Null>	<Null>	Canada East Coast	Canada East Coast - Flemish Pass_Core13	<Null>	<Null>	<Null>	0	<Null>	48.5809	-45.5643	1120	0	0	0	0	<Null>	0	0	0	0	0	<Null>	0	0	0	<Null>	<Null>	<Null>	0	<Null>	0	<Null>	0	<Null>	<Null>	<Null>	0.2	<Null>	~7ka yearts ago	<Null>	<Null>	<Null>	<Null>	<Null>	Nereida Project 2009-2010 on board Spanish vessel RV Miguel Oliver and during CCGS Hudson expedition 2011-032	Geological Survey of Canada - Atlantic
28	28	Point	<Null>	<Null>	Canada East Coast	Canada East Coast - Flemish Pass_Core14	<Null>	<Null>	<Null>	0	<Null>	48.3887	-45.6473	965	0	0	0	0	<Null>	0	0	0	0	0	<Null>	0	0	0	<Null>	<Null>	<Null>	0	<Null>	0	<Null>	0	<Null>	<Null>	<Null>	13	<Null>	~20.5ka years ago	<Null>	<Null>	<Null>	<Null>	<Null>	Nereida Project 2009-2010 on board Spanish vessel RV Miguel Oliver and during CCGS Hudson expedition 2011-033	Geological Survey of Canada - Atlantic
29	29	Point	<Null>	<Null>	Canada East Coast	Canada East Coast - Newfoundland_1449	Newfoundland_1449	<Null>	<Null>	0	<Null>	47.1039	-52.8434	-159.351	0	0	0	0	<Null>	0	0	0	0	0	<Null>	0	0	0	<Null>	<Null>	<Null>	0	<Null>	0	<Null>	0	<Null>	<Null>	<Null>	<Null>	<Null>	<Null>	<Null>	<Null>	<Null>	<Null>	<Null>	Ned King excel data ???	<Null>
30	30	Point	<Null>	<Null>	Canada East Coast	Canada East Coast - Newfoundland_1450	Newfoundland_1450	<Null>	<Null>	0	<Null>	47.111	-52.8434	-150.802	0	0	0	0	<Null>	0	0	0	0	0	<Null>	0	0	0	<Null>	<Null>	<Null>	0	<Null>	0	<Null>	0	<Null>	<Null>	<Null>	<Null>	<Null>	<Null>	<Null>	<Null>	<Null>	<Null>	<Null>	Ned King excel data ???	<Null>
31	31	Point	<Null>	<Null>	Canada East Coast	Canada East Coast - Newfoundland_738	Newfoundland_738	<Null>	<Null>	0	<Null>	45.7704	-56.8247	-285.268	0	0	0	0	<Null>	0	0	0	0	0	<Null>	0	0	0	<Null>	<Null>	<Null>	0	<Null>	0	<Null>	0	<Null>	<Null>	<Null>	<Null>	<Null>	<Null>	<Null>	<Null>	<Null>	<Null>	<Null>	Ned King excel data ???	<Null>
32	32	Point	<Null>	<Null>	Canada East Coast	Canada East Coast - Newfoundland_739	Newfoundland_739	<Null>	<Null>	0	<Null>	45.3894	-52.8944	-92.673	0	0	0	0	<Null>	0	0	0	0	0	<Null>	0	0	0	<Null>	<Null>	<Null>	0	<Null>	0	<Null>	0	<Null>	<Null>	<Null>	<Null>	<Null>	<Null>	<Null>	<Null>	<Null>	<Null>	<Null>	Ned King excel data ???	<Null>
33	33	Point	<Null>	<Null>	Canada East Coast	Canada East Coast - Newfoundland_740	Newfoundland_740	<Null>	<Null>	0	<Null>	45.4812	-56.5701	-295.607	0	0	0	0	<Null>	0	0	0	0	0	<Null>	0	0	0	<Null>	<Null>	<Null>	0	<Null>	0	<Null>	0	<Null>	<Null>	<Null>	<Null>	<Null>	<Null>	<Null>	<Null>	<Null>	<Null>	<Null>	Ned King excel data ???	<Null>
34	34	Point	<Null>	<Null>	Canada East Coast	Canada East Coast - Newfoundland_1156	Newfoundland_1156	<Null>	<Null>	0	<Null>	45.1354	-55.3585	-138.968	0	0	0	0	<Null>	0	0	0	0	0	<Null>	0	0	0	<Null>	<Null>	<Null>	0	<Null>	0	<Null>	0	<Null>	<Null>	<Null>	<Null>	<Null>	<Null>	<Null>	<Null>	<Null>	<Null>	<Null>	Ned King excel data ???	<Null>
35	35	Point	<Null>	<Null>	Canada East Coast	Canada East Coast - Newfoundland_1157	Newfoundland_1157	<Null>	<Null>	0	<Null>	45.1637	-55.1752	-183.203	0	0	0	0	<Null>	0	0	0	0	0	<Null>	0	0	0	<Null>	<Null>	<Null>	0	<Null>	0	<Null>	0	<Null>	<Null>	<Null>	<Null>	<Null>	<Null>	<Null>	<Null>	<Null>	<Null>	<Null>	Ned King excel data ???	<Null>
36	36	Point	<Null>	<Null>	Canada East Coast	Canada East Coast - Newfoundland_1159	Newfoundland_1159	<Null>	<Null>	0	<Null>	45.1637	-55.1548	-180.608	0	0	0	0	<Null>	0	0	0	0	0	<Null>	0	0	0	<Null>	<Null>	<Null>	0	<Null>	0	<Null>	0	<Null>	<Null>	<Null>	<Null>	<Null>	<Null>	<Null>	<Null>	<Null>	<Null>	<Null>	Ned King excel data ???	<Null>
37	37	Point	<Null>	<Null>	Canada East Coast	Canada East Coast - Newfoundland_1160	Newfoundland_1160	<Null>	<Null>	0	<Null>	45.1284	-55.4196	-151.927	0	0	0	0	<Null>	0	0	0	0	0	<Null>	0	0	0	<Null>	<Null>	<Null>	0	<Null>	0	<Null>	0	<Null>	<Null>	<Null>	<Null>	<Null>	<Null>	<Null>	<Null>	<Null>	<Null>	<Null>	Ned King excel data ???	<Null>
38	38	Point	<Null>	<Null>	Canada East Coast	Canada East Coast - Newfoundland_1162	Newfoundland_1162	<Null>	<Null>	0	<Null>	45.0719	-55.501	-155.371	0	0	0	0	<Null>	0	0	0	0	0	<Null>	0	0	0	<Null>	<Null>	<Null>	0	<Null>	0	<Null>	0	<Null>	<Null>	<Null>	<Null>	<Null>	<Null>	<Null>	<Null>	<Null>	<Null>	<Null>	Ned King excel data ???	<Null>
39	39	Point	<Null>	<Null>	Canada East Coast	Canada East Coast - Newfoundland_1787	Newfoundland_1787	<Null>	<Null>	0	<Null>	47.492	-56.397	-362.778	0	0	0	0	<Null>	0	0	0	0	0	<Null>	0	0	0	<Null>	<Null>	<Null>	0	<Null>	0	<Null>	0	<Null>	<Null>	<Null>	<Null>	<Null>	<Null>	<Null>	<Null>	<Null>	<Null>	<Null>	Ned King excel data ???	<Null>
40	40	Point	<Null>	<Null>	Canada East Coast	Canada East Coast - Newfoundland_1888	Newfoundland_1888	<Null>	<Null>	0	<Null>	47.5766	-56.3258	-252.311	0	0	0	0	<Null>	0	0	0	0	0	<Null>	0	0	0	<Null>	<Null>	<Null>	0	<Null>	0	<Null>	0	<Null>	<Null>	<Null>	<Null>	<Null>	<Null>	<Null>	<Null>	<Null>	<Null>	<Null>	Ned King excel data ???	<Null>
41	41	Point	<Null>	<Null>	Canada East Coast	Canada East Coast - Newfoundland_1917	Newfoundland_1917	<Null>	<Null>	0	<Null>	47.7036	-54.0348	-159.333	0	0	0	0	<Null>	0	0	0	0	0	<Null>	0	0	0	<Null>	<Null>	<Null>	0	<Null>	0	<Null>	0	<Null>	<Null>	<Null>	<Null>	<Null>	<Null>	<Null>	<Null>	<Null>	<Null>	<Null>	Ned King excel data ???	<Null>
42	42	Point	<Null>	<Null>	Canada East Coast	Canada East Coast - Newfoundland_1918	Newfoundland_1918	<Null>	<Null>	0	<Null>	47.6895	-54.0755	-201.303	0	0	0	0	<Null>	0	0	0	0	0	<Null>	0	0	0	<Null>	<Null>	<Null>	0	<Null>	0	<Null>	0	<Null>	<Null>	<Null>	<Null>	<Null>	<Null>	<Null>	<Null>	<Null>	<Null>	<Null>	Ned King excel data ???	<Null>
43	43	Point	<Null>	<Null>	Canada East Coast	Canada East Coast - Newfoundland_2355	Newfoundland_2355	<Null>	<Null>	0	<Null>	48.3951	-54.1468	0	0	0	0	0	<Null>	0	0	0	0	0	<Null>	0	0	0	<Null>	<Null>	<Null>	0	<Null>	0	<Null>	0	<Null>	<Null>	<Null>	<Null>	<Null>	<Null>	<Null>	<Null>	<Null>	<Null>	<Null>	Ned King excel data ???	<Null>
44	44	Point	<Null>	<Null>	Canada East Coast	Canada East Coast - Newfoundland_2356	Newfoundland_2356	<Null>	<Null>	0	<Null>	47.6401	-53.1082	-272.144	0	0	0	0	<Null>	0	0	0	0	0	<Null>	0	0	0	<Null>	<Null>	<Null>	0	<Null>	0	<Null>	0	<Null>	<Null>	<Null>	<Null>	<Null>	<Null>	<Null>	<Null>	<Null>	<Null>	<Null>	Ned King excel data ???	<Null>
45	45	Point	<Null>	<Null>	Canada East Coast	Canada East Coast - Newfoundland_6768	Newfoundland_6768	<Null>	<Null>	0	<Null>	48.134	-53.2915	-468	0	0	0	0	<Null>	0	0	0	0	0	<Null>	0	0	0	<Null>	<Null>	<Null>	0	<Null>	0	<Null>	0	<Null>	<Null>	<Null>	<Null>	<Null>	<Null>	<Null>	<Null>	<Null>	<Null>	<Null>	Ned King excel data ???	<Null>
46	46	Point	<Null>	<Null>	Canada East Coast	Canada East Coast - Newfoundland_6771	Newfoundland_6771	<Null>	<Null>	0	<Null>	49.0089	-50.1553	-350	0	0	0	0	<Null>	0	0	0	0	0	<Null>	0	0	0	<Null>	<Null>	<Null>	0	<Null>	0	<Null>	0	<Null>	<Null>	<Null>	<Null>	<Null>	<Null>	<Null>	<Null>	<Null>	<Null>	<Null>	Ned King excel data ???	<Null>
47	47	Point	<Null>	<Null>	Canada East Coast	Canada East Coast - Newfoundland_6772	Newfoundland_6772	<Null>	<Null>	0	<Null>	49.0019	-50.0942	-488	0	0	0	0	<Null>	0	0	0	0	0	<Null>	0	0	0	<Null>	<Null>	<Null>	0	<Null>	0	<Null>	0	<Null>	<Null>	<Null>	<Null>	<Null>	<Null>	<Null>	<Null>	<Null>	<Null>	<Null>	Ned King excel data ???	<Null>
48	48	Point	<Null>	<Null>	Canada East Coast	Canada East Coast - Newfoundland_6773	Newfoundland_6773	<Null>	<Null>	0	<Null>	49.0089	-50.1553	-350	0	0	0	0	<Null>	0	0	0	0	0	<Null>	0	0	0	<Null>	<Null>	<Null>	0	<Null>	0	<Null>	0	<Null>	<Null>	<Null>	<Null>	<Null>	<Null>	<Null>	<Null>	<Null>	<Null>	<Null>	Ned King excel data ???	<Null>
49	49	Point	<Null>	<Null>	Canada East Coast	Canada East Coast - Newfoundland_6774	Newfoundland_6774	<Null>	<Null>	0	<Null>	48.8607	-50.0433	-389.444	0	0	0	0	<Null>	0	0	0	0	0	<Null>	0	0	0	<Null>	<Null>	<Null>	0	<Null>	0	<Null>	0	<Null>	<Null>	<Null>	<Null>	<Null>	<Null>	<Null>	<Null>	<Null>	<Null>	<Null>	Ned King excel data ???	<Null>
50	50	Point	<Null>	<Null>	Canada East Coast	Canada East Coast - Newfoundland_6775	Newfoundland_6775	<Null>	<Null>	0	<Null>	48.8607	-50.0841	-313.089	0	0	0	0	<Null>	0	0	0	0	0	<Null>	0	0	0	<Null>	<Null>	<Null>	0	<Null>	0	<Null>	0	<Null>	<Null>	<Null>	<Null>	<Null>	<Null>	<Null>	<Null>	<Null>	<Null>	<Null>	Ned King excel data ???	<Null>
51	51	Point	<Null>	<Null>	Canada East Coast	Canada East Coast - Newfoundland_6829	Newfoundland_6829	<Null>	<Null>	0	<Null>	47.9647	-53.4442	-291.205	0	0	0	0	<Null>	0	0	0	0	0	<Null>	0	0	0	<Null>	<Null>	<Null>	0	<Null>	0	<Null>	0	<Null>	<Null>	<Null>	<Null>	<Null>	<Null>	<Null>	<Null>	<Null>	<Null>	<Null>	Ned King excel data ???	<Null>
52	52	Point	<Null>	<Null>	Canada East Coast	Canada East Coast - Newfoundland_6830	Newfoundland_6830	<Null>	<Null>	0	<Null>	48.0211	-53.3933	-149.075	0	0	0	0	<Null>	0	0	0	0	0	<Null>	0	0	0	<Null>	<Null>	<Null>	0	<Null>	0	<Null>	0	<Null>	<Null>	<Null>	<Null>	<Null>	<Null>	<Null>	<Null>	<Null>	<Null>	<Null>	Ned King excel data ???	<Null>
53	53	Point	<Null>	<Null>	Canada East Coast	Canada East Coast - Newfoundland_6831	Newfoundland_6831	<Null>	<Null>	0	<Null>	48.0211	-53.3933	-149.075	0	0	0	0	<Null>	0	0	0	0	0	<Null>	0	0	0	<Null>	<Null>	<Null>	0	<Null>	0	<Null>	0	<Null>	<Null>	<Null>	<Null>	<Null>	<Null>	<Null>	<Null>	<Null>	<Null>	<Null>	Ned King excel data ???	<Null>
54	54	Point	<Null>	<Null>	Canada East Coast	Canada East Coast - Newfoundland_6832	Newfoundland_6832	<Null>	<Null>	0	<Null>	48.0353	-53.3831	-140.119	0	0	0	0	<Null>	0	0	0	0	0	<Null>	0	0	0	<Null>	<Null>	<Null>	0	<Null>	0	<Null>	0	<Null>	<Null>	<Null>	<Null>	<Null>	<Null>	<Null>	<Null>	<Null>	<Null>	<Null>	Ned King excel data ???	<Null>
55	55	Point	<Null>	<Null>	Canada East Coast	Canada East Coast - Newfoundland_6833	Newfoundland_6833	<Null>	<Null>	0	<Null>	48.0776	-53.3424	-127.576	0	0	0	0	<Null>	0	0	0	0	0	<Null>	0	0	0	<Null>	<Null>	<Null>	0	<Null>	0	<Null>	0	<Null>	<Null>	<Null>	<Null>	<Null>	<Null>	<Null>	<Null>	<Null>	<Null>	<Null>	Ned King excel data ???	<Null>
56	56	Point	<Null>	<Null>	Canada East Coast	Canada East Coast - Newfoundland_6834	Newfoundland_6834	<Null>	<Null>	0	<Null>	48.0776	-53.3424	-127.576	0	0	0	0	<Null>	0	0	0	0	0	<Null>	0	0	0	<Null>	<Null>	<Null>	0	<Null>	0	<Null>	0	<Null>	<Null>	<Null>	<Null>	<Null>	<Null>	<Null>	<Null>	<Null>	<Null>	<Null>	Ned King excel data ???	<Null>
57	57	Point	<Null>	<Null>	Canada East Coast	Canada East Coast - Newfoundland_7465	Newfoundland_7465	<Null>	<Null>	0	<Null>	45.4529	-52.314	-99.032	0	0	0	0	<Null>	0	0	0	0	0	<Null>	0	0	0	<Null>	<Null>	<Null>	0	<Null>	0	<Null>	0	<Null>	<Null>	<Null>	<Null>	<Null>	<Null>	<Null>	<Null>	<Null>	<Null>	<Null>	Ned King excel data ???	<Null>
58	58	Point	<Null>	<Null>	Canada East Coast	Canada East Coast - Newfoundland_13796	Newfoundland_13796	<Null>	<Null>	0	<Null>	53.3795	-53.3795	0	0	0	0	0	<Null>	0	0	0	0	0	<Null>	0	0	0	<Null>	<Null>	<Null>	0	<Null>	0	<Null>	0	<Null>	<Null>	<Null>	<Null>	<Null>	<Null>	<Null>	<Null>	<Null>	<Null>	<Null>	Ned King excel data ???	<Null>
59	59	Point	<Null>	<Null>	Canada East Coast	Canada East Coast - Newfoundland_13797	Newfoundland_13797	<Null>	<Null>	0	<Null>	53.3882	-53.3882	0	0	0	0	0	<Null>	0	0	0	0	0	<Null>	0	0	0	<Null>	<Null>	<Null>	0	<Null>	0	<Null>	0	<Null>	<Null>	<Null>	<Null>	<Null>	<Null>	<Null>	<Null>	<Null>	<Null>	<Null>	Ned King excel data ???	<Null>
60	60	Point	<Null>	<Null>	Canada East Coast	Canada East Coast - Newfoundland_13798	Newfoundland_13798	<Null>	<Null>	0	<Null>	53.4895	-53.4895	0	0	0	0	0	<Null>	0	0	0	0	0	<Null>	0	0	0	<Null>	<Null>	<Null>	0	<Null>	0	<Null>	0	<Null>	<Null>	<Null>	<Null>	<Null>	<Null>	<Null>	<Null>	<Null>	<Null>	<Null>	Ned King excel data ???	<Null>
61	61	Point	<Null>	<Null>	Canada East Coast	Canada East Coast - Newfoundland_13799	Newfoundland_13799	<Null>	<Null>	0	<Null>	53.6097	-53.6097	0	0	0	0	0	<Null>	0	0	0	0	0	<Null>	0	0	0	<Null>	<Null>	<Null>	0	<Null>	0	<Null>	0	<Null>	<Null>	<Null>	<Null>	<Null>	<Null>	<Null>	<Null>	<Null>	<Null>	<Null>	Ned King excel data ???	<Null>
62	62	Point	<Null>	<Null>	Canada West Coast	Canada West Coast_1	<Null>	<Null>	<Null>	0	<Null>	49.6521	-124.928	0	0	0	0	0	<Null>	0	0	0	0	0	<Null>	0	0	0	<Null>	<Null>	<Null>	0	<Null>	0	<Null>	0	<Null>	<Null>	<Null>	<Null>	<Null>	<Null>	<Null>	<Null>	<Null>	<Null>	<Null>	<Null>	Geological Survey of Canada - Pacific
63	63	Point	<Null>	<Null>	Canada West Coast	Canada West Coast_2	<Null>	<Null>	<Null>	0	<Null>	49.6488	-124.919	0	0	0	0	0	<Null>	0	0	0	0	0	<Null>	0	0	0	<Null>	<Null>	<Null>	0	<Null>	0	<Null>	0	<Null>	<Null>	<Null>	<Null>	<Null>	<Null>	<Null>	<Null>	<Null>	<Null>	<Null>	<Null>	Geological Survey of Canada - Pacific
64	64	Point	<Null>	<Null>	Canada West Coast	Canada West Coast_3	<Null>	<Null>	<Null>	0	<Null>	49.642	-124.88	0	0	0	0	0	<Null>	0	0	0	0	0	<Null>	0	0	0	<Null>	<Null>	<Null>	0	<Null>	0	<Null>	0	<Null>	<Null>	<Null>	<Null>	<Null>	<Null>	<Null>	<Null>	<Null>	<Null>	<Null>	<Null>	Geological Survey of Canada - Pacific
65	65	Point	<Null>	<Null>	Canada West Coast	Canada West Coast_4	<Null>	<Null>	<Null>	0	<Null>	49.6224	-124.861	0	0	0	0	0	<Null>	0	0	0	0	0	<Null>	0	0	0	<Null>	<Null>	<Null>	0	<Null>	0	<Null>	0	<Null>	<Null>	<Null>	<Null>	<Null>	<Null>	<Null>	<Null>	<Null>	<Null>	<Null>	<Null>	Geological Survey of Canada - Pacific
66	66	Point	<Null>	<Null>	Canada West Coast	Canada West Coast_5	<Null>	<Null>	<Null>	0	<Null>	49.6504	-124.843	0	0	0	0	0	<Null>	0	0	0	0	0	<Null>	0	0	0	<Null>	<Null>	<Null>	0	<Null>	0	<Null>	0	<Null>	<Null>	<Null>	<Null>	<Null>	<Null>	<Null>	<Null>	<Null>	<Null>	<Null>	<Null>	Geological Survey of Canada - Pacific
67	67	Point	<Null>	<Null>	Canada West Coast	Canada West Coast_6	<Null>	<Null>	<Null>	0	<Null>	49.4675	-124.741	0	0	0	0	0	<Null>	0	0	0	0	0	<Null>	0	0	0	<Null>	<Null>	<Null>	0	<Null>	0	<Null>	0	<Null>	<Null>	<Null>	<Null>	<Null>	<Null>	<Null>	<Null>	<Null>	<Null>	<Null>	<Null>	Geological Survey of Canada - Pacific
68	68	Point	<Null>	<Null>	Canada West Coast	Canada West Coast_7	<Null>	<Null>	<Null>	0	<Null>	49.457	-124.044	0	0	0	0	0	<Null>	0	0	0	0	0	<Null>	0	0	0	<Null>	<Null>	<Null>	0	<Null>	0	<Null>	0	<Null>	<Null>	<Null>	<Null>	<Null>	<Null>	<Null>	<Null>	<Null>	<Null>	<Null>	<Null>	Geological Survey of Canada - Pacific
69	69	Point	<Null>	<Null>	Canada West Coast	Canada West Coast_8	<Null>	<Null>	<Null>	0	<Null>	49.2928	-124.007	0	0	0	0	0	<Null>	0	0	0	0	0	<Null>	0	0	0	<Null>	<Null>	<Null>	0	<Null>	0	<Null>	0	<Null>	<Null>	<Null>	<Null>	<Null>	<Null>	<Null>	<Null>	<Null>	<Null>	<Null>	<Null>	Geological Survey of Canada - Pacific
70	70	Point	<Null>	<Null>	Canada West Coast	Canada West Coast_9	<Null>	<Null>	<Null>	0	<Null>	49.7689	-124.457	0	0	0	0	0	<Null>	0	0	0	0	0	<Null>	0	0	0	<Null>	<Null>	<Null>	0	<Null>	0	<Null>	0	<Null>	<Null>	<Null>	<Null>	<Null>	<Null>	<Null>	<Null>	<Null>	<Null>	<Null>	<Null>	Geological Survey of Canada - Pacific
71	71	Point	<Null>	<Null>	Canada West Coast	Canada West Coast_10	<Null>	<Null>	<Null>	0	<Null>	49.0936	-123.348	0	0	0	0	0	<Null>	0	0	0	0	0	<Null>	0	0	0	<Null>	<Null>	<Null>	0	<Null>	0	<Null>	0	<Null>	<Null>	<Null>	<Null>	<Null>	<Null>	<Null>	<Null>	<Null>	<Null>	<Null>	<Null>	Geological Survey of Canada - Pacific
72	72	Point	<Null>	<Null>	Canada West Coast	Canada West Coast_11	<Null>	<Null>	<Null>	0	<Null>	49.1293	-123.323	0	0	0	0	0	<Null>	0	0	0	0	0	<Null>	0	0	0	<Null>	<Null>	<Null>	0	<Null>	0	<Null>	0	<Null>	<Null>	<Null>	<Null>	<Null>	<Null>	<Null>	<Null>	<Null>	<Null>	<Null>	<Null>	Geological Survey of Canada - Pacific
73	73	Point	<Null>	<Null>	Canada West Coast	Canada West Coast_12	<Null>	<Null>	<Null>	0	<Null>	49.0235	-123.271	0	0	0	0	0	<Null>	0	0	0	0	0	<Null>	0	0	0	<Null>	<Null>	<Null>	0	<Null>	0	<Null>	0	<Null>	<Null>	<Null>	<Null>	<Null>	<Null>	<Null>	<Null>	<Null>	<Null>	<Null>	<Null>	Geological Survey of Canada - Pacific
74	74	Point	<Null>	<Null>	Canada West Coast	Canada West Coast_13	<Null>	<Null>	<Null>	0	<Null>	49.0501	-123.338	0	0	0	0	0	<Null>	0	0	0	0	0	<Null>	0	0	0	<Null>	<Null>	<Null>	0	<Null>	0	<Null>	0	<Null>	<Null>	<Null>	<Null>	<Null>	<Null>	<Null>	<Null>	<Null>	<Null>	<Null>	<Null>	Geological Survey of Canada - Pacific
75	75	Point	<Null>	<Null>	Canada West Coast	Canada West Coast_14	<Null>	<Null>	<Null>	0	<Null>	48.9975	-123.202	0	0	0	0	0	<Null>	0	0	0	0	0	<Null>	0	0	0	<Null>	<Null>	<Null>	0	<Null>	0	<Null>	0	<Null>	<Null>	<Null>	<Null>	<Null>	<Null>	<Null>	<Null>	<Null>	<Null>	<Null>	<Null>	Geological Survey of Canada - Pacific
76	76	Point	<Null>	<Null>	Canada West Coast	Canada West Coast_15	<Null>	<Null>	<Null>	0	<Null>	48.9685	-123.09	0	0	0	0	0	<Null>	0	0	0	0	0	<Null>	0	0	0	<Null>	<Null>	<Null>	0	<Null>	0	<Null>	0	<Null>	<Null>	<Null>	<Null>	<Null>	<Null>	<Null>	<Null>	<Null>	<Null>	<Null>	<Null>	Geological Survey of Canada - Pacific
77	77	Point	<Null>	<Null>	Canada West Coast	Canada West Coast_16	<Null>	<Null>	<Null>	0	<Null>	49.3419	-123.983	0	0	0	0	0	<Null>	0	0	0	0	0	<Null>	0	0	0	<Null>	<Null>	<Null>	0	<Null>	0	<Null>	0	<Null>	<Null>	<Null>	<Null>	<Null>	<Null>	<Null>	<Null>	<Null>	<Null>	<Null>	<Null>	Geological Survey of Canada - Pacific
78	78	Point	<Null>	<Null>	Canada West Coast	Canada West Coast_17	<Null>	<Null>	<Null>	0	<Null>	49.3404	-123.976	0	0	0	0	0	<Null>	0	0	0	0	0	<Null>	0	0	0	<Null>	<Null>	<Null>	0	<Null>	0	<Null>	0	<Null>	<Null>	<Null>	<Null>	<Null>	<Null>	<Null>	<Null>	<Null>	<Null>	<Null>	<Null>	Geological Survey of Canada - Pacific
79	79	Point	<Null>	<Null>	Canada West Coast	Canada West Coast_18	<Null>	<Null>	<Null>	0	<Null>	49.4342	-124.089	0	0	0	0	0	<Null>	0	0	0	0	0	<Null>	0	0	0	<Null>	<Null>	<Null>	0	<Null>	0	<Null>	0	<Null>	<Null>	<Null>	<Null>	<Null>	<Null>	<Null>	<Null>	<Null>	<Null>	<Null>	<Null>	Geological Survey of Canada - Pacific
80	80	Point	<Null>	<Null>	Canada West Coast	Canada West Coast_19	<Null>	<Null>	<Null>	0	<Null>	49.3638	-123.752	0	0	0	0	0	<Null>	0	0	0	0	0	<Null>	0	0	0	<Null>	<Null>	<Null>	0	<Null>	0	<Null>	0	<Null>	<Null>	<Null>	<Null>	<Null>	<Null>	<Null>	<Null>	<Null>	<Null>	<Null>	<Null>	Geological Survey of Canada - Pacific
81	81	Point	<Null>	<Null>	Canada West Coast	Canada West Coast_20	<Null>	<Null>	<Null>	0	<Null>	49.3493	-123.725	0	0	0	0	0	<Null>	0	0	0	0	0	<Null>	0	0	0	<Null>	<Null>	<Null>	0	<Null>	0	<Null>	0	<Null>	<Null>	<Null>	<Null>	<Null>	<Null>	<Null>	<Null>	<Null>	<Null>	<Null>	<Null>	Geological Survey of Canada - Pacific
82	82	Point	<Null>	<Null>	Canada West Coast	Canada West Coast_21	<Null>	<Null>	<Null>	0	<Null>	49.3751	-123.554	0	0	0	0	0	<Null>	0	0	0	0	0	<Null>	0	0	0	<Null>	<Null>	<Null>	0	<Null>	0	<Null>	0	<Null>	<Null>	<Null>	<Null>	<Null>	<Null>	<Null>	<Null>	<Null>	<Null>	<Null>	<Null>	Geological Survey of Canada - Pacific
83	83	Point	<Null>	<Null>	Canada West Coast	Canada West Coast_22	<Null>	<Null>	<Null>	0	<Null>	49.3889	-123.575	0	0	0	0	0	<Null>	0	0	0	0	0	<Null>	0	0	0	<Null>	<Null>	<Null>	0	<Null>	0	<Null>	0	<Null>	<Null>	<Null>	<Null>	<Null>	<Null>	<Null>	<Null>	<Null>	<Null>	<Null>	<Null>	Geological Survey of Canada - Pacific
84	84	Point	<Null>	<Null>	Canada West Coast	Canada West Coast_23	<Null>	<Null>	<Null>	0	<Null>	49.3647	-123.872	0	0	0	0	0	<Null>	0	0	0	0	0	<Null>	0	0	0	<Null>	<Null>	<Null>	0	<Null>	0	<Null>	0	<Null>	<Null>	<Null>	<Null>	<Null>	<Null>	<Null>	<Null>	<Null>	<Null>	<Null>	<Null>	Geological Survey of Canada - Pacific
85	85	Point	<Null>	<Null>	Canada West Coast	Canada West Coast_24	<Null>	<Null>	<Null>	0	<Null>	49.9842	-125.093	0	0	0	0	0	<Null>	0	0	0	0	0	<Null>	0	0	0	<Null>	<Null>	<Null>	0	<Null>	0	<Null>	0	<Null>	<Null>	<Null>	<Null>	<Null>	<Null>	<Null>	<Null>	<Null>	<Null>	<Null>	<Null>	Geological Survey of Canada - Pacific
86	86	Point	<Null>	<Null>	Canada West Coast	Canada West Coast_25	<Null>	<Null>	<Null>	0	<Null>	50.0118	-125.124	0	0	0	0	0	<Null>	0	0	0	0	0	<Null>	0	0	0	<Null>	<Null>	<Null>	0	<Null>	0	<Null>	0	<Null>	<Null>	<Null>	<Null>	<Null>	<Null>	<Null>	<Null>	<Null>	<Null>	<Null>	<Null>	Geological Survey of Canada - Pacific
87	87	Point	<Null>	<Null>	Canada West Coast	Canada West Coast_26	<Null>	<Null>	<Null>	0	<Null>	50.0209	-125.139	0	0	0	0	0	<Null>	0	0	0	0	0	<Null>	0	0	0	<Null>	<Null>	<Null>	0	<Null>	0	<Null>	0	<Null>	<Null>	<Null>	<Null>	<Null>	<Null>	<Null>	<Null>	<Null>	<Null>	<Null>	<Null>	Geological Survey of Canada - Pacific
88	88	Point	<Null>	<Null>	Canada West Coast	Canada West Coast_27	<Null>	<Null>	<Null>	0	<Null>	50.0438	-125.157	0	0	0	0	0	<Null>	0	0	0	0	0	<Null>	0	0	0	<Null>	<Null>	<Null>	0	<Null>	0	<Null>	0	<Null>	<Null>	<Null>	<Null>	<Null>	<Null>	<Null>	<Null>	<Null>	<Null>	<Null>	<Null>	Geological Survey of Canada - Pacific
89	89	Point	<Null>	<Null>	Canada West Coast	Canada West Coast_28	<Null>	<Null>	<Null>	0	<Null>	50.3701	-124.958	0	0	0	0	0	<Null>	0	0	0	0	0	<Null>	0	0	0	<Null>	<Null>	<Null>	0	<Null>	0	<Null>	0	<Null>	<Null>	<Null>	<Null>	<Null>	<Null>	<Null>	<Null>	<Null>	<Null>	<Null>	<Null>	Geological Survey of Canada - Pacific
90	90	Point	<Null>	<Null>	Canada West Coast	Canada West Coast_29	<Null>	<Null>	<Null>	0	<Null>	50.1668	-123.916	0	0	0	0	0	<Null>	0	0	0	0	0	<Null>	0	0	0	<Null>	<Null>	<Null>	0	<Null>	0	<Null>	0	<Null>	<Null>	<Null>	<Null>	<Null>	<Null>	<Null>	<Null>	<Null>	<Null>	<Null>	<Null>	Geological Survey of Canada - Pacific
91	91	Point	<Null>	<Null>	Canada West Coast	Canada West Coast_30	<Null>	<Null>	<Null>	0	<Null>	49.8868	-123.883	0	0	0	0	0	<Null>	0	0	0	0	0	<Null>	0	0	0	<Null>	<Null>	<Null>	0	<Null>	0	<Null>	0	<Null>	<Null>	<Null>	<Null>	<Null>	<Null>	<Null>	<Null>	<Null>	<Null>	<Null>	<Null>	Geological Survey of Canada - Pacific
92	92	Point	<Null>	<Null>	Canada West Coast	Canada West Coast_31	<Null>	<Null>	<Null>	0	<Null>	49.8796	-123.879	0	0	0	0	0	<Null>	0	0	0	0	0	<Null>	0	0	0	<Null>	<Null>	<Null>	0	<Null>	0	<Null>	0	<Null>	<Null>	<Null>	<Null>	<Null>	<Null>	<Null>	<Null>	<Null>	<Null>	<Null>	<Null>	Geological Survey of Canada - Pacific
93	93	Point	<Null>	<Null>	Canada West Coast	Canada West Coast_32	<Null>	<Null>	<Null>	0	<Null>	49.8475	-123.885	0	0	0	0	0	<Null>	0	0	0	0	0	<Null>	0	0	0	<Null>	<Null>	<Null>	0	<Null>	0	<Null>	0	<Null>	<Null>	<Null>	<Null>	<Null>	<Null>	<Null>	<Null>	<Null>	<Null>	<Null>	<Null>	Geological Survey of Canada - Pacific
94	94	Point	<Null>	<Null>	Canada West Coast	Canada West Coast_33	<Null>	<Null>	<Null>	0	<Null>	49.4365	-123.737	0	0	0	0	0	<Null>	0	0	0	0	0	<Null>	0	0	0	<Null>	<Null>	<Null>	0	<Null>	0	<Null>	0	<Null>	<Null>	<Null>	<Null>	<Null>	<Null>	<Null>	<Null>	<Null>	<Null>	<Null>	<Null>	Geological Survey of Canada - Pacific
95	95	Point	<Null>	<Null>	Canada West Coast	Canada West Coast_34	<Null>	<Null>	<Null>	0	<Null>	49.6921	-124.676	0	0	0	0	0	<Null>	0	0	0	0	0	<Null>	0	0	0	<Null>	<Null>	<Null>	0	<Null>	0	<Null>	0	<Null>	<Null>	<Null>	<Null>	<Null>	<Null>	<Null>	<Null>	<Null>	<Null>	<Null>	<Null>	Geological Survey of Canada - Pacific
96	96	Point	<Null>	<Null>	Canada West Coast	Canada West Coast_35	<Null>	<Null>	<Null>	0	<Null>	49.7956	-124.02	0	0	0	0	0	<Null>	0	0	0	0	0	<Null>	0	0	0	<Null>	<Null>	<Null>	0	<Null>	0	<Null>	0	<Null>	<Null>	<Null>	<Null>	<Null>	<Null>	<Null>	<Null>	<Null>	<Null>	<Null>	<Null>	Geological Survey of Canada - Pacific
97	97	Point	<Null>	<Null>	Canada West Coast	Canada West Coast_36	<Null>	<Null>	<Null>	0	<Null>	49.9173	-125.018	0	0	0	0	0	<Null>	0	0	0	0	0	<Null>	0	0	0	<Null>	<Null>	<Null>	0	<Null>	0	<Null>	0	<Null>	<Null>	<Null>	<Null>	<Null>	<Null>	<Null>	<Null>	<Null>	<Null>	<Null>	<Null>	Geological Survey of Canada - Pacific
98	98	Point	<Null>	<Null>	Canada West Coast	Canada West Coast_37	<Null>	<Null>	<Null>	0	<Null>	49.8913	-124.995	0	0	0	0	0	<Null>	0	0	0	0	0	<Null>	0	0	0	<Null>	<Null>	<Null>	0	<Null>	0	<Null>	0	<Null>	<Null>	<Null>	<Null>	<Null>	<Null>	<Null>	<Null>	<Null>	<Null>	<Null>	<Null>	Geological Survey of Canada - Pacific
99	99	Point	<Null>	<Null>	Canada West Coast	Canada West Coast_38	<Null>	<Null>	<Null>	0	<Null>	50.0099	-124.945	0	0	0	0	0	<Null>	0	0	0	0	0	<Null>	0	0	0	<Null>	<Null>	<Null>	0	<Null>	0	<Null>	0	<Null>	<Null>	<Null>	<Null>	<Null>	<Null>	<Null>	<Null>	<Null>	<Null>	<Null>	<Null>	Geological Survey of Canada - Pacific
100	100	Point	<Null>	<Null>	Canada West Coast	Canada West Coast_39	<Null>	<Null>	<Null>	0	<Null>	49.864	-124.617	0	0	0	0	0	<Null>	0	0	0	0	0	<Null>	0	0	0	<Null>	<Null>	<Null>	0	<Null>	0	<Null>	0	<Null>	<Null>	<Null>	<Null>	<Null>	<Null>	<Null>	<Null>	<Null>	<Null>	<Null>	<Null>	Geological Survey of Canada - Pacific
101	101	Point	<Null>	<Null>	Canada West Coast	Canada West Coast_40	<Null>	<Null>	<Null>	0	<Null>	49.8756	-124.627	0	0	0	0	0	<Null>	0	0	0	0	0	<Null>	0	0	0	<Null>	<Null>	<Null>	0	<Null>	0	<Null>	0	<Null>	<Null>	<Null>	<Null>	<Null>	<Null>	<Null>	<Null>	<Null>	<Null>	<Null>	<Null>	Geological Survey of Canada - Pacific
102	102	Point	<Null>	<Null>	Canada West Coast	Canada West Coast_41	<Null>	<Null>	<Null>	0	<Null>	50.3552	-124.697	0	0	0	0	0	<Null>	0	0	0	0	0	<Null>	0	0	0	<Null>	<Null>	<Null>	0	<Null>	0	<Null>	0	<Null>	<Null>	<Null>	<Null>	<Null>	<Null>	<Null>	<Null>	<Null>	<Null>	<Null>	<Null>	Geological Survey of Canada - Pacific
103	103	Point	<Null>	<Null>	Canada West Coast	Canada West Coast_42	<Null>	<Null>	<Null>	0	<Null>	50.4155	-124.607	0	0	0	0	0	<Null>	0	0	0	0	0	<Null>	0	0	0	<Null>	<Null>	<Null>	0	<Null>	0	<Null>	0	<Null>	<Null>	<Null>	<Null>	<Null>	<Null>	<Null>	<Null>	<Null>	<Null>	<Null>	<Null>	Geological Survey of Canada - Pacific
104	104	Point	<Null>	<Null>	Canada West Coast	Canada West Coast_43	<Null>	<Null>	<Null>	0	<Null>	50.4161	-124.6	0	0	0	0	0	<Null>	0	0	0	0	0	<Null>	0	0	0	<Null>	<Null>	<Null>	0	<Null>	0	<Null>	0	<Null>	<Null>	<Null>	<Null>	<Null>	<Null>	<Null>	<Null>	<Null>	<Null>	<Null>	<Null>	Geological Survey of Canada - Pacific
105	105	Point	<Null>	<Null>	Canada West Coast	Canada West Coast_44	<Null>	<Null>	<Null>	0	<Null>	50.4147	-124.586	0	0	0	0	0	<Null>	0	0	0	0	0	<Null>	0	0	0	<Null>	<Null>	<Null>	0	<Null>	0	<Null>	0	<Null>	<Null>	<Null>	<Null>	<Null>	<Null>	<Null>	<Null>	<Null>	<Null>	<Null>	<Null>	Geological Survey of Canada - Pacific
106	106	Point	<Null>	<Null>	Canada West Coast	Canada West Coast_45	<Null>	<Null>	<Null>	0	<Null>	50.4369	-124.509	0	0	0	0	0	<Null>	0	0	0	0	0	<Null>	0	0	0	<Null>	<Null>	<Null>	0	<Null>	0	<Null>	0	<Null>	<Null>	<Null>	<Null>	<Null>	<Null>	<Null>	<Null>	<Null>	<Null>	<Null>	<Null>	Geological Survey of Canada - Pacific
107	107	Point	<Null>	<Null>	Canada West Coast	Canada West Coast_46	<Null>	<Null>	<Null>	0	<Null>	50.4445	-124.478	0	0	0	0	0	<Null>	0	0	0	0	0	<Null>	0	0	0	<Null>	<Null>	<Null>	0	<Null>	0	<Null>	0	<Null>	<Null>	<Null>	<Null>	<Null>	<Null>	<Null>	<Null>	<Null>	<Null>	<Null>	<Null>	Geological Survey of Canada - Pacific
108	108	Point	<Null>	<Null>	Canada West Coast	Canada West Coast_47	<Null>	<Null>	<Null>	0	<Null>	50.4022	-124.559	0	0	0	0	0	<Null>	0	0	0	0	0	<Null>	0	0	0	<Null>	<Null>	<Null>	0	<Null>	0	<Null>	0	<Null>	<Null>	<Null>	<Null>	<Null>	<Null>	<Null>	<Null>	<Null>	<Null>	<Null>	<Null>	Geological Survey of Canada - Pacific
109	109	Point	<Null>	<Null>	Canada West Coast	Canada West Coast_48	<Null>	<Null>	<Null>	0	<Null>	50.2416	-125.015	0	0	0	0	0	<Null>	0	0	0	0	0	<Null>	0	0	0	<Null>	<Null>	<Null>	0	<Null>	0	<Null>	0	<Null>	<Null>	<Null>	<Null>	<Null>	<Null>	<Null>	<Null>	<Null>	<Null>	<Null>	<Null>	Geological Survey of Canada - Pacific
110	110	Point	<Null>	<Null>	Canada West Coast	Canada West Coast_49	<Null>	<Null>	<Null>	0	<Null>	49.6141	-124.847	0	0	0	0	0	<Null>	0	0	0	0	0	<Null>	0	0	0	<Null>	<Null>	<Null>	0	<Null>	0	<Null>	0	<Null>	<Null>	<Null>	<Null>	<Null>	<Null>	<Null>	<Null>	<Null>	<Null>	<Null>	<Null>	Geological Survey of Canada - Pacific
111	111	Point	<Null>	<Null>	Canada West Coast	Canada West Coast_50	<Null>	<Null>	<Null>	0	<Null>	50.1852	-123.933	0	0	0	0	0	<Null>	0	0	0	0	0	<Null>	0	0	0	<Null>	<Null>	<Null>	0	<Null>	0	<Null>	0	<Null>	<Null>	<Null>	<Null>	<Null>	<Null>	<Null>	<Null>	<Null>	<Null>	<Null>	<Null>	Geological Survey of Canada - Pacific
112	112	Point	<Null>	<Null>	Canada West Coast	Canada West Coast_51	<Null>	<Null>	<Null>	0	<Null>	50.138	-123.821	0	0	0	0	0	<Null>	0	0	0	0	0	<Null>	0	0	0	<Null>	<Null>	<Null>	0	<Null>	0	<Null>	0	<Null>	<Null>	<Null>	<Null>	<Null>	<Null>	<Null>	<Null>	<Null>	<Null>	<Null>	<Null>	Geological Survey of Canada - Pacific
113	113	Point	<Null>	<Null>	Canada West Coast	Canada West Coast_52	<Null>	<Null>	<Null>	0	<Null>	49.9108	-123.955	0	0	0	0	0	<Null>	0	0	0	0	0	<Null>	0	0	0	<Null>	<Null>	<Null>	0	<Null>	0	<Null>	0	<Null>	<Null>	<Null>	<Null>	<Null>	<Null>	<Null>	<Null>	<Null>	<Null>	<Null>	<Null>	Geological Survey of Canada - Pacific
114	114	Point	<Null>	<Null>	Canada West Coast	Canada West Coast_53	<Null>	<Null>	<Null>	0	<Null>	49.9294	-123.961	0	0	0	0	0	<Null>	0	0	0	0	0	<Null>	0	0	0	<Null>	<Null>	<Null>	0	<Null>	0	<Null>	0	<Null>	<Null>	<Null>	<Null>	<Null>	<Null>	<Null>	<Null>	<Null>	<Null>	<Null>	<Null>	Geological Survey of Canada - Pacific
115	115	Point	<Null>	<Null>	Canada West Coast	Canada West Coast_54	<Null>	<Null>	<Null>	0	<Null>	50.4225	-124.661	0	0	0	0	0	<Null>	0	0	0	0	0	<Null>	0	0	0	<Null>	<Null>	<Null>	0	<Null>	0	<Null>	0	<Null>	<Null>	<Null>	<Null>	<Null>	<Null>	<Null>	<Null>	<Null>	<Null>	<Null>	<Null>	Geological Survey of Canada - Pacific
116	116	Point	<Null>	<Null>	Canada West Coast	Canada West Coast_55	<Null>	<Null>	<Null>	0	<Null>	50.2658	-124.993	0	0	0	0	0	<Null>	0	0	0	0	0	<Null>	0	0	0	<Null>	<Null>	<Null>	0	<Null>	0	<Null>	0	<Null>	<Null>	<Null>	<Null>	<Null>	<Null>	<Null>	<Null>	<Null>	<Null>	<Null>	<Null>	Geological Survey of Canada - Pacific
117	117	Point	<Null>	<Null>	Canada West Coast	Canada West Coast_56	<Null>	<Null>	<Null>	0	<Null>	49.8685	-124.62	0	0	0	0	0	<Null>	0	0	0	0	0	<Null>	0	0	0	<Null>	<Null>	<Null>	0	<Null>	0	<Null>	0	<Null>	<Null>	<Null>	<Null>	<Null>	<Null>	<Null>	<Null>	<Null>	<Null>	<Null>	<Null>	Geological Survey of Canada - Pacific
118	118	Point	<Null>	<Null>	Canada West Coast	Canada West Coast_57	<Null>	<Null>	<Null>	0	<Null>	49.8326	-124.678	0	0	0	0	0	<Null>	0	0	0	0	0	<Null>	0	0	0	<Null>	<Null>	<Null>	0	<Null>	0	<Null>	0	<Null>	<Null>	<Null>	<Null>	<Null>	<Null>	<Null>	<Null>	<Null>	<Null>	<Null>	<Null>	Geological Survey of Canada - Pacific
119	119	Point	<Null>	<Null>	Canada West Coast	Canada West Coast_58	<Null>	<Null>	<Null>	0	<Null>	49.8331	-124.669	0	0	0	0	0	<Null>	0	0	0	0	0	<Null>	0	0	0	<Null>	<Null>	<Null>	0	<Null>	0	<Null>	0	<Null>	<Null>	<Null>	<Null>	<Null>	<Null>	<Null>	<Null>	<Null>	<Null>	<Null>	<Null>	Geological Survey of Canada - Pacific
120	120	Point	<Null>	<Null>	Canada West Coast	Canada West Coast_59	<Null>	<Null>	<Null>	0	<Null>	49.8289	-124.641	0	0	0	0	0	<Null>	0	0	0	0	0	<Null>	0	0	0	<Null>	<Null>	<Null>	0	<Null>	0	<Null>	0	<Null>	<Null>	<Null>	<Null>	<Null>	<Null>	<Null>	<Null>	<Null>	<Null>	<Null>	<Null>	Geological Survey of Canada - Pacific
121	121	Point	<Null>	<Null>	Canada West Coast	Canada West Coast_60	<Null>	<Null>	<Null>	0	<Null>	49.6918	-124.557	0	0	0	0	0	<Null>	0	0	0	0	0	<Null>	0	0	0	<Null>	<Null>	<Null>	0	<Null>	0	<Null>	0	<Null>	<Null>	<Null>	<Null>	<Null>	<Null>	<Null>	<Null>	<Null>	<Null>	<Null>	<Null>	Geological Survey of Canada - Pacific
122	122	Point	<Null>	<Null>	Canada West Coast	Canada West Coast_61	<Null>	<Null>	<Null>	0	<Null>	49.699	-124.566	0	0	0	0	0	<Null>	0	0	0	0	0	<Null>	0	0	0	<Null>	<Null>	<Null>	0	<Null>	0	<Null>	0	<Null>	<Null>	<Null>	<Null>	<Null>	<Null>	<Null>	<Null>	<Null>	<Null>	<Null>	<Null>	Geological Survey of Canada - Pacific
123	123	Point	<Null>	<Null>	Canada West Coast	Canada West Coast_62	<Null>	<Null>	<Null>	0	<Null>	49.3491	-124.06	0	0	0	0	0	<Null>	0	0	0	0	0	<Null>	0	0	0	<Null>	<Null>	<Null>	0	<Null>	0	<Null>	0	<Null>	<Null>	<Null>	<Null>	<Null>	<Null>	<Null>	<Null>	<Null>	<Null>	<Null>	<Null>	Geological Survey of Canada - Pacific
124	124	Point	<Null>	<Null>	Canada West Coast	Canada West Coast_63	<Null>	<Null>	<Null>	0	<Null>	49.3455	-124.021	0	0	0	0	0	<Null>	0	0	0	0	0	<Null>	0	0	0	<Null>	<Null>	<Null>	0	<Null>	0	<Null>	0	<Null>	<Null>	<Null>	<Null>	<Null>	<Null>	<Null>	<Null>	<Null>	<Null>	<Null>	<Null>	Geological Survey of Canada - Pacific
125	125	Point	<Null>	<Null>	Canada West Coast	Canada West Coast_64	<Null>	<Null>	<Null>	0	<Null>	50.0067	-124.951	0	0	0	0	0	<Null>	0	0	0	0	0	<Null>	0	0	0	<Null>	<Null>	<Null>	0	<Null>	0	<Null>	0	<Null>	<Null>	<Null>	<Null>	<Null>	<Null>	<Null>	<Null>	<Null>	<Null>	<Null>	<Null>	Geological Survey of Canada - Pacific
126	126	Point	<Null>	<Null>	Canada West Coast	Canada West Coast_65	<Null>	<Null>	<Null>	0	<Null>	50.001	-124.962	0	0	0	0	0	<Null>	0	0	0	0	0	<Null>	0	0	0	<Null>	<Null>	<Null>	0	<Null>	0	<Null>	0	<Null>	<Null>	<Null>	<Null>	<Null>	<Null>	<Null>	<Null>	<Null>	<Null>	<Null>	<Null>	Geological Survey of Canada - Pacific
127	127	Point	<Null>	<Null>	Canada West Coast	Canada West Coast_66	<Null>	<Null>	<Null>	0	<Null>	49.9941	-124.966	0	0	0	0	0	<Null>	0	0	0	0	0	<Null>	0	0	0	<Null>	<Null>	<Null>	0	<Null>	0	<Null>	0	<Null>	<Null>	<Null>	<Null>	<Null>	<Null>	<Null>	<Null>	<Null>	<Null>	<Null>	<Null>	Geological Survey of Canada - Pacific
128	128	Point	<Null>	<Null>	Canada West Coast	Canada West Coast_67	<Null>	<Null>	<Null>	0	<Null>	49.1776	-123.882	0	0	0	0	0	<Null>	0	0	0	0	0	<Null>	0	0	0	<Null>	<Null>	<Null>	0	<Null>	0	<Null>	0	<Null>	<Null>	<Null>	<Null>	<Null>	<Null>	<Null>	<Null>	<Null>	<Null>	<Null>	<Null>	Geological Survey of Canada - Pacific
129	129	Point	<Null>	<Null>	Canada West Coast	Canada West Coast_68	<Null>	<Null>	<Null>	0	<Null>	50.4353	-125.064	0	0	0	0	0	<Null>	0	0	0	0	0	<Null>	0	0	0	<Null>	<Null>	<Null>	0	<Null>	0	<Null>	0	<Null>	<Null>	<Null>	<Null>	<Null>	<Null>	<Null>	<Null>	<Null>	<Null>	<Null>	<Null>	Geological Survey of Canada - Pacific
130	130	Point	<Null>	<Null>	Canada West Coast	Canada West Coast_69	<Null>	<Null>	<Null>	0	<Null>	50.2249	-124.639	0	0	0	0	0	<Null>	0	0	0	0	0	<Null>	0	0	0	<Null>	<Null>	<Null>	0	<Null>	0	<Null>	0	<Null>	<Null>	<Null>	<Null>	<Null>	<Null>	<Null>	<Null>	<Null>	<Null>	<Null>	<Null>	Geological Survey of Canada - Pacific
131	131	Point	<Null>	<Null>	Canada West Coast	Canada West Coast_70	<Null>	<Null>	<Null>	0	<Null>	50.2109	-124.64	0	0	0	0	0	<Null>	0	0	0	0	0	<Null>	0	0	0	<Null>	<Null>	<Null>	0	<Null>	0	<Null>	0	<Null>	<Null>	<Null>	<Null>	<Null>	<Null>	<Null>	<Null>	<Null>	<Null>	<Null>	<Null>	Geological Survey of Canada - Pacific
132	132	Point	<Null>	<Null>	Canada West Coast	Canada West Coast_71	<Null>	<Null>	<Null>	0	<Null>	49.8713	-123.883	0	0	0	0	0	<Null>	0	0	0	0	0	<Null>	0	0	0	<Null>	<Null>	<Null>	0	<Null>	0	<Null>	0	<Null>	<Null>	<Null>	<Null>	<Null>	<Null>	<Null>	<Null>	<Null>	<Null>	<Null>	<Null>	Geological Survey of Canada - Pacific
133	133	Point	<Null>	<Null>	Canada West Coast	Canada West Coast_72	<Null>	<Null>	<Null>	0	<Null>	49.034	-125.155	0	0	0	0	0	<Null>	0	0	0	0	0	<Null>	0	0	0	<Null>	<Null>	<Null>	0	<Null>	0	<Null>	0	<Null>	<Null>	<Null>	<Null>	<Null>	<Null>	<Null>	<Null>	<Null>	<Null>	<Null>	<Null>	Geological Survey of Canada - Pacific
134	134	Point	<Null>	<Null>	Canada West Coast	Canada West Coast_73	<Null>	<Null>	<Null>	0	<Null>	49.061	-124.848	0	0	0	0	0	<Null>	0	0	0	0	0	<Null>	0	0	0	<Null>	<Null>	<Null>	0	<Null>	0	<Null>	0	<Null>	<Null>	<Null>	<Null>	<Null>	<Null>	<Null>	<Null>	<Null>	<Null>	<Null>	<Null>	Geological Survey of Canada - Pacific
135	135	Point	<Null>	<Null>	Canada West Coast	Canada West Coast_74	<Null>	<Null>	<Null>	0	<Null>	50.0919	-123.764	0	0	0	0	0	<Null>	0	0	0	0	0	<Null>	0	0	0	<Null>	<Null>	<Null>	0	<Null>	0	<Null>	0	<Null>	<Null>	<Null>	<Null>	<Null>	<Null>	<Null>	<Null>	<Null>	<Null>	<Null>	<Null>	Geological Survey of Canada - Pacific
136	136	Point	<Null>	<Null>	Canada West Coast	Canada West Coast_75	<Null>	<Null>	<Null>	0	<Null>	50.3045	-124.893	0	0	0	0	0	<Null>	0	0	0	0	0	<Null>	0	0	0	<Null>	<Null>	<Null>	0	<Null>	0	<Null>	0	<Null>	<Null>	<Null>	<Null>	<Null>	<Null>	<Null>	<Null>	<Null>	<Null>	<Null>	<Null>	Geological Survey of Canada - Pacific
137	137	Point	<Null>	<Null>	Canada West Coast	Canada West Coast_76	<Null>	<Null>	<Null>	0	<Null>	50.3037	-124.887	0	0	0	0	0	<Null>	0	0	0	0	0	<Null>	0	0	0	<Null>	<Null>	<Null>	0	<Null>	0	<Null>	0	<Null>	<Null>	<Null>	<Null>	<Null>	<Null>	<Null>	<Null>	<Null>	<Null>	<Null>	<Null>	Geological Survey of Canada - Pacific
138	138	Point	<Null>	<Null>	Canada West Coast	Canada West Coast_77	<Null>	<Null>	<Null>	0	<Null>	50.1033	-125.171	0	0	0	0	0	<Null>	0	0	0	0	0	<Null>	0	0	0	<Null>	<Null>	<Null>	0	<Null>	0	<Null>	0	<Null>	<Null>	<Null>	<Null>	<Null>	<Null>	<Null>	<Null>	<Null>	<Null>	<Null>	<Null>	Geological Survey of Canada - Pacific
139	139	Point	<Null>	<Null>	Canada West Coast	Canada West Coast_78	<Null>	<Null>	<Null>	0	<Null>	49.7617	-124.421	0	0	0	0	0	<Null>	0	0	0	0	0	<Null>	0	0	0	<Null>	<Null>	<Null>	0	<Null>	0	<Null>	0	<Null>	<Null>	<Null>	<Null>	<Null>	<Null>	<Null>	<Null>	<Null>	<Null>	<Null>	<Null>	Geological Survey of Canada - Pacific
140	140	Point	<Null>	<Null>	Canada West Coast	Canada West Coast_79	<Null>	<Null>	<Null>	0	<Null>	49.7633	-124.438	0	0	0	0	0	<Null>	0	0	0	0	0	<Null>	0	0	0	<Null>	<Null>	<Null>	0	<Null>	0	<Null>	0	<Null>	<Null>	<Null>	<Null>	<Null>	<Null>	<Null>	<Null>	<Null>	<Null>	<Null>	<Null>	Geological Survey of Canada - Pacific
141	141	Point	<Null>	<Null>	Canada West Coast	Canada West Coast_80	<Null>	<Null>	<Null>	0	<Null>	49.7579	-124.4	0	0	0	0	0	<Null>	0	0	0	0	0	<Null>	0	0	0	<Null>	<Null>	<Null>	0	<Null>	0	<Null>	0	<Null>	<Null>	<Null>	<Null>	<Null>	<Null>	<Null>	<Null>	<Null>	<Null>	<Null>	<Null>	Geological Survey of Canada - Pacific
142	142	Point	<Null>	<Null>	Canada West Coast	Canada West Coast_81	<Null>	<Null>	<Null>	0	<Null>	50.1862	-123.965	0	0	0	0	0	<Null>	0	0	0	0	0	<Null>	0	0	0	<Null>	<Null>	<Null>	0	<Null>	0	<Null>	0	<Null>	<Null>	<Null>	<Null>	<Null>	<Null>	<Null>	<Null>	<Null>	<Null>	<Null>	<Null>	Geological Survey of Canada - Pacific
143	143	Point	<Null>	<Null>	Canada West Coast	Canada West Coast_82	<Null>	<Null>	<Null>	0	<Null>	50.1378	-123.852	0	0	0	0	0	<Null>	0	0	0	0	0	<Null>	0	0	0	<Null>	<Null>	<Null>	0	<Null>	0	<Null>	0	<Null>	<Null>	<Null>	<Null>	<Null>	<Null>	<Null>	<Null>	<Null>	<Null>	<Null>	<Null>	Geological Survey of Canada - Pacific
144	144	Point	<Null>	<Null>	Canada West Coast	Canada West Coast_83	<Null>	<Null>	<Null>	0	<Null>	49.9435	-123.971	0	0	0	0	0	<Null>	0	0	0	0	0	<Null>	0	0	0	<Null>	<Null>	<Null>	0	<Null>	0	<Null>	0	<Null>	<Null>	<Null>	<Null>	<Null>	<Null>	<Null>	<Null>	<Null>	<Null>	<Null>	<Null>	Geological Survey of Canada - Pacific
145	145	Point	<Null>	<Null>	Canada West Coast	Canada West Coast_84	<Null>	<Null>	<Null>	0	<Null>	49.3786	-123.507	0	0	0	0	0	<Null>	0	0	0	0	0	<Null>	0	0	0	<Null>	<Null>	<Null>	0	<Null>	0	<Null>	0	<Null>	<Null>	<Null>	<Null>	<Null>	<Null>	<Null>	<Null>	<Null>	<Null>	<Null>	<Null>	Geological Survey of Canada - Pacific
146	146	Point	<Null>	<Null>	Canada West Coast	Canada West Coast_85	<Null>	<Null>	<Null>	0	<Null>	49.3403	-123.442	0	0	0	0	0	<Null>	0	0	0	0	0	<Null>	0	0	0	<Null>	<Null>	<Null>	0	<Null>	0	<Null>	0	<Null>	<Null>	<Null>	<Null>	<Null>	<Null>	<Null>	<Null>	<Null>	<Null>	<Null>	<Null>	Geological Survey of Canada - Pacific
147	147	Point	<Null>	<Null>	Canada West Coast	Canada West Coast_86	<Null>	<Null>	<Null>	0	<Null>	49.3728	-123.533	0	0	0	0	0	<Null>	0	0	0	0	0	<Null>	0	0	0	<Null>	<Null>	<Null>	0	<Null>	0	<Null>	0	<Null>	<Null>	<Null>	<Null>	<Null>	<Null>	<Null>	<Null>	<Null>	<Null>	<Null>	<Null>	Geological Survey of Canada - Pacific
148	148	Point	<Null>	<Null>	Canada West Coast	Canada West Coast_87	<Null>	<Null>	<Null>	0	<Null>	49.3769	-123.528	0	0	0	0	0	<Null>	0	0	0	0	0	<Null>	0	0	0	<Null>	<Null>	<Null>	0	<Null>	0	<Null>	0	<Null>	<Null>	<Null>	<Null>	<Null>	<Null>	<Null>	<Null>	<Null>	<Null>	<Null>	<Null>	Geological Survey of Canada - Pacific
149	149	Point	<Null>	<Null>	Canada West Coast	Canada West Coast_88	<Null>	<Null>	<Null>	0	<Null>	49.3914	-123.497	0	0	0	0	0	<Null>	0	0	0	0	0	<Null>	0	0	0	<Null>	<Null>	<Null>	0	<Null>	0	<Null>	0	<Null>	<Null>	<Null>	<Null>	<Null>	<Null>	<Null>	<Null>	<Null>	<Null>	<Null>	<Null>	Geological Survey of Canada - Pacific
150	150	Point	<Null>	<Null>	Canada West Coast	Canada West Coast_89	<Null>	<Null>	<Null>	0	<Null>	49.413	-123.438	0	0	0	0	0	<Null>	0	0	0	0	0	<Null>	0	0	0	<Null>	<Null>	<Null>	0	<Null>	0	<Null>	0	<Null>	<Null>	<Null>	<Null>	<Null>	<Null>	<Null>	<Null>	<Null>	<Null>	<Null>	<Null>	Geological Survey of Canada - Pacific
151	151	Point	<Null>	<Null>	Canada West Coast	Canada West Coast_90	<Null>	<Null>	<Null>	0	<Null>	49.394	-123.398	0	0	0	0	0	<Null>	0	0	0	0	0	<Null>	0	0	0	<Null>	<Null>	<Null>	0	<Null>	0	<Null>	0	<Null>	<Null>	<Null>	<Null>	<Null>	<Null>	<Null>	<Null>	<Null>	<Null>	<Null>	<Null>	Geological Survey of Canada - Pacific
152	152	Point	<Null>	<Null>	Canada West Coast	Canada West Coast_91	<Null>	<Null>	<Null>	0	<Null>	50.2536	-124.618	0	0	0	0	0	<Null>	0	0	0	0	0	<Null>	0	0	0	<Null>	<Null>	<Null>	0	<Null>	0	<Null>	0	<Null>	<Null>	<Null>	<Null>	<Null>	<Null>	<Null>	<Null>	<Null>	<Null>	<Null>	<Null>	Geological Survey of Canada - Pacific
153	153	Point	<Null>	<Null>	Canada West Coast	Canada West Coast_92	<Null>	<Null>	<Null>	0	<Null>	50.5821	-124.953	0	0	0	0	0	<Null>	0	0	0	0	0	<Null>	0	0	0	<Null>	<Null>	<Null>	0	<Null>	0	<Null>	0	<Null>	<Null>	<Null>	<Null>	<Null>	<Null>	<Null>	<Null>	<Null>	<Null>	<Null>	<Null>	Geological Survey of Canada - Pacific
154	154	Point	<Null>	<Null>	Canada West Coast	Canada West Coast_93	<Null>	<Null>	<Null>	0	<Null>	50.671	-124.915	0	0	0	0	0	<Null>	0	0	0	0	0	<Null>	0	0	0	<Null>	<Null>	<Null>	0	<Null>	0	<Null>	0	<Null>	<Null>	<Null>	<Null>	<Null>	<Null>	<Null>	<Null>	<Null>	<Null>	<Null>	<Null>	Geological Survey of Canada - Pacific
155	155	Point	<Null>	<Null>	Canada West Coast	Canada West Coast_94	<Null>	<Null>	<Null>	0	<Null>	50.6955	-124.907	0	0	0	0	0	<Null>	0	0	0	0	0	<Null>	0	0	0	<Null>	<Null>	<Null>	0	<Null>	0	<Null>	0	<Null>	<Null>	<Null>	<Null>	<Null>	<Null>	<Null>	<Null>	<Null>	<Null>	<Null>	<Null>	Geological Survey of Canada - Pacific
156	156	Point	<Null>	<Null>	Canada West Coast	Canada West Coast_95	<Null>	<Null>	<Null>	0	<Null>	50.6993	-124.908	0	0	0	0	0	<Null>	0	0	0	0	0	<Null>	0	0	0	<Null>	<Null>	<Null>	0	<Null>	0	<Null>	0	<Null>	<Null>	<Null>	<Null>	<Null>	<Null>	<Null>	<Null>	<Null>	<Null>	<Null>	<Null>	Geological Survey of Canada - Pacific
157	157	Point	<Null>	<Null>	Canada West Coast	Canada West Coast_96	<Null>	<Null>	<Null>	0	<Null>	50.7042	-124.906	0	0	0	0	0	<Null>	0	0	0	0	0	<Null>	0	0	0	<Null>	<Null>	<Null>	0	<Null>	0	<Null>	0	<Null>	<Null>	<Null>	<Null>	<Null>	<Null>	<Null>	<Null>	<Null>	<Null>	<Null>	<Null>	Geological Survey of Canada - Pacific
158	158	Point	<Null>	<Null>	Canada West Coast	Canada West Coast_97	<Null>	<Null>	<Null>	0	<Null>	50.7101	-124.903	0	0	0	0	0	<Null>	0	0	0	0	0	<Null>	0	0	0	<Null>	<Null>	<Null>	0	<Null>	0	<Null>	0	<Null>	<Null>	<Null>	<Null>	<Null>	<Null>	<Null>	<Null>	<Null>	<Null>	<Null>	<Null>	Geological Survey of Canada - Pacific
159	159	Point	<Null>	<Null>	Canada West Coast	Canada West Coast_98	<Null>	<Null>	<Null>	0	<Null>	50.7596	-124.943	0	0	0	0	0	<Null>	0	0	0	0	0	<Null>	0	0	0	<Null>	<Null>	<Null>	0	<Null>	0	<Null>	0	<Null>	<Null>	<Null>	<Null>	<Null>	<Null>	<Null>	<Null>	<Null>	<Null>	<Null>	<Null>	Geological Survey of Canada - Pacific
160	160	Point	<Null>	<Null>	Canada West Coast	Canada West Coast_99	<Null>	<Null>	<Null>	0	<Null>	50.7707	-124.942	0	0	0	0	0	<Null>	0	0	0	0	0	<Null>	0	0	0	<Null>	<Null>	<Null>	0	<Null>	0	<Null>	0	<Null>	<Null>	<Null>	<Null>	<Null>	<Null>	<Null>	<Null>	<Null>	<Null>	<Null>	<Null>	Geological Survey of Canada - Pacific
161	161	Point	<Null>	<Null>	Canada West Coast	Canada West Coast_100	<Null>	<Null>	<Null>	0	<Null>	50.7984	-124.973	0	0	0	0	0	<Null>	0	0	0	0	0	<Null>	0	0	0	<Null>	<Null>	<Null>	0	<Null>	0	<Null>	0	<Null>	<Null>	<Null>	<Null>	<Null>	<Null>	<Null>	<Null>	<Null>	<Null>	<Null>	<Null>	Geological Survey of Canada - Pacific
162	162	Point	<Null>	<Null>	Canada West Coast	Canada West Coast_101	<Null>	<Null>	<Null>	0	<Null>	50.8106	-124.973	0	0	0	0	0	<Null>	0	0	0	0	0	<Null>	0	0	0	<Null>	<Null>	<Null>	0	<Null>	0	<Null>	0	<Null>	<Null>	<Null>	<Null>	<Null>	<Null>	<Null>	<Null>	<Null>	<Null>	<Null>	<Null>	Geological Survey of Canada - Pacific
163	163	Point	<Null>	<Null>	Canada West Coast	Canada West Coast_102	<Null>	<Null>	<Null>	0	<Null>	50.8187	-124.968	0	0	0	0	0	<Null>	0	0	0	0	0	<Null>	0	0	0	<Null>	<Null>	<Null>	0	<Null>	0	<Null>	0	<Null>	<Null>	<Null>	<Null>	<Null>	<Null>	<Null>	<Null>	<Null>	<Null>	<Null>	<Null>	Geological Survey of Canada - Pacific
164	164	Point	<Null>	<Null>	Canada West Coast	Canada West Coast_103	<Null>	<Null>	<Null>	0	<Null>	50.8314	-124.914	0	0	0	0	0	<Null>	0	0	0	0	0	<Null>	0	0	0	<Null>	<Null>	<Null>	0	<Null>	0	<Null>	0	<Null>	<Null>	<Null>	<Null>	<Null>	<Null>	<Null>	<Null>	<Null>	<Null>	<Null>	<Null>	Geological Survey of Canada - Pacific
165	165	Point	<Null>	<Null>	Canada West Coast	Canada West Coast_104	<Null>	<Null>	<Null>	0	<Null>	50.8343	-124.908	0	0	0	0	0	<Null>	0	0	0	0	0	<Null>	0	0	0	<Null>	<Null>	<Null>	0	<Null>	0	<Null>	0	<Null>	<Null>	<Null>	<Null>	<Null>	<Null>	<Null>	<Null>	<Null>	<Null>	<Null>	<Null>	Geological Survey of Canada - Pacific
166	166	Point	<Null>	<Null>	Canada West Coast	Canada West Coast_105	<Null>	<Null>	<Null>	0	<Null>	50.8426	-124.907	0	0	0	0	0	<Null>	0	0	0	0	0	<Null>	0	0	0	<Null>	<Null>	<Null>	0	<Null>	0	<Null>	0	<Null>	<Null>	<Null>	<Null>	<Null>	<Null>	<Null>	<Null>	<Null>	<Null>	<Null>	<Null>	Geological Survey of Canada - Pacific
167	167	Point	<Null>	<Null>	Canada West Coast	Canada West Coast_106	<Null>	<Null>	<Null>	0	<Null>	50.8457	-124.898	0	0	0	0	0	<Null>	0	0	0	0	0	<Null>	0	0	0	<Null>	<Null>	<Null>	0	<Null>	0	<Null>	0	<Null>	<Null>	<Null>	<Null>	<Null>	<Null>	<Null>	<Null>	<Null>	<Null>	<Null>	<Null>	Geological Survey of Canada - Pacific
168	168	Point	<Null>	<Null>	Canada West Coast	Canada West Coast_107	<Null>	<Null>	<Null>	0	<Null>	50.8447	-124.901	0	0	0	0	0	<Null>	0	0	0	0	0	<Null>	0	0	0	<Null>	<Null>	<Null>	0	<Null>	0	<Null>	0	<Null>	<Null>	<Null>	<Null>	<Null>	<Null>	<Null>	<Null>	<Null>	<Null>	<Null>	<Null>	Geological Survey of Canada - Pacific
169	169	Point	<Null>	<Null>	Canada West Coast	Canada West Coast_108	<Null>	<Null>	<Null>	0	<Null>	50.8552	-124.89	0	0	0	0	0	<Null>	0	0	0	0	0	<Null>	0	0	0	<Null>	<Null>	<Null>	0	<Null>	0	<Null>	0	<Null>	<Null>	<Null>	<Null>	<Null>	<Null>	<Null>	<Null>	<Null>	<Null>	<Null>	<Null>	Geological Survey of Canada - Pacific
170	170	Point	<Null>	<Null>	Canada West Coast	Canada West Coast_109	<Null>	<Null>	<Null>	0	<Null>	50.8578	-124.893	0	0	0	0	0	<Null>	0	0	0	0	0	<Null>	0	0	0	<Null>	<Null>	<Null>	0	<Null>	0	<Null>	0	<Null>	<Null>	<Null>	<Null>	<Null>	<Null>	<Null>	<Null>	<Null>	<Null>	<Null>	<Null>	Geological Survey of Canada - Pacific
171	171	Point	<Null>	<Null>	Canada West Coast	Canada West Coast_110	<Null>	<Null>	<Null>	0	<Null>	50.8641	-124.892	0	0	0	0	0	<Null>	0	0	0	0	0	<Null>	0	0	0	<Null>	<Null>	<Null>	0	<Null>	0	<Null>	0	<Null>	<Null>	<Null>	<Null>	<Null>	<Null>	<Null>	<Null>	<Null>	<Null>	<Null>	<Null>	Geological Survey of Canada - Pacific
172	172	Point	<Null>	<Null>	Canada West Coast	Canada West Coast_111	<Null>	<Null>	<Null>	0	<Null>	50.8848	-124.872	0	0	0	0	0	<Null>	0	0	0	0	0	<Null>	0	0	0	<Null>	<Null>	<Null>	0	<Null>	0	<Null>	0	<Null>	<Null>	<Null>	<Null>	<Null>	<Null>	<Null>	<Null>	<Null>	<Null>	<Null>	<Null>	Geological Survey of Canada - Pacific
209	173	Point	<Null>	<Null>	Canada West Coast	Canada West Coast_112	<Null>	<Null>	<Null>	0	<Null>	50.8955	-124.857	0	0	0	0	0	<Null>	0	0	0	0	0	<Null>	0	0	0	<Null>	<Null>	<Null>	0	<Null>	0	<Null>	0	<Null>	<Null>	<Null>	<Null>	<Null>	<Null>	<Null>	<Null>	<Null>	<Null>	<Null>	<Null>	Geological Survey of Canada - Pacific
210	174	Point	<Null>	<Null>	Canada West Coast	Canada West Coast_113	<Null>	<Null>	<Null>	0	<Null>	50.8938	-124.861	0	0	0	0	0	<Null>	0	0	0	0	0	<Null>	0	0	0	<Null>	<Null>	<Null>	0	<Null>	0	<Null>	0	<Null>	<Null>	<Null>	<Null>	<Null>	<Null>	<Null>	<Null>	<Null>	<Null>	<Null>	<Null>	Geological Survey of Canada - Pacific
211	175	Point	<Null>	<Null>	Canada West Coast	Canada West Coast_114	<Null>	<Null>	<Null>	0	<Null>	50.913	-124.849	0	0	0	0	0	<Null>	0	0	0	0	0	<Null>	0	0	0	<Null>	<Null>	<Null>	0	<Null>	0	<Null>	0	<Null>	<Null>	<Null>	<Null>	<Null>	<Null>	<Null>	<Null>	<Null>	<Null>	<Null>	<Null>	Geological Survey of Canada - Pacific
212	176	Point	<Null>	<Null>	Canada West Coast	Canada West Coast_115	<Null>	<Null>	<Null>	0	<Null>	50.8623	-124.847	0	0	0	0	0	<Null>	0	0	0	0	0	<Null>	0	0	0	<Null>	<Null>	<Null>	0	<Null>	0	<Null>	0	<Null>	<Null>	<Null>	<Null>	<Null>	<Null>	<Null>	<Null>	<Null>	<Null>	<Null>	<Null>	Geological Survey of Canada - Pacific
213	177	Point	<Null>	<Null>	Canada West Coast	Canada West Coast_116	<Null>	<Null>	<Null>	0	<Null>	50.8261	-124.87	0	0	0	0	0	<Null>	0	0	0	0	0	<Null>	0	0	0	<Null>	<Null>	<Null>	0	<Null>	0	<Null>	0	<Null>	<Null>	<Null>	<Null>	<Null>	<Null>	<Null>	<Null>	<Null>	<Null>	<Null>	<Null>	Geological Survey of Canada - Pacific
214	178	Point	<Null>	<Null>	Canada West Coast	Canada West Coast_117	<Null>	<Null>	<Null>	0	<Null>	50.7572	-124.871	0	0	0	0	0	<Null>	0	0	0	0	0	<Null>	0	0	0	<Null>	<Null>	<Null>	0	<Null>	0	<Null>	0	<Null>	<Null>	<Null>	<Null>	<Null>	<Null>	<Null>	<Null>	<Null>	<Null>	<Null>	<Null>	Geological Survey of Canada - Pacific
215	179	Point	<Null>	<Null>	Canada West Coast	Canada West Coast_118	<Null>	<Null>	<Null>	0	<Null>	50.7403	-124.85	0	0	0	0	0	<Null>	0	0	0	0	0	<Null>	0	0	0	<Null>	<Null>	<Null>	0	<Null>	0	<Null>	0	<Null>	<Null>	<Null>	<Null>	<Null>	<Null>	<Null>	<Null>	<Null>	<Null>	<Null>	<Null>	Geological Survey of Canada - Pacific
216	180	Point	<Null>	<Null>	Canada West Coast	Canada West Coast_119	<Null>	<Null>	<Null>	0	<Null>	50.7323	-124.839	0	0	0	0	0	<Null>	0	0	0	0	0	<Null>	0	0	0	<Null>	<Null>	<Null>	0	<Null>	0	<Null>	0	<Null>	<Null>	<Null>	<Null>	<Null>	<Null>	<Null>	<Null>	<Null>	<Null>	<Null>	<Null>	Geological Survey of Canada - Pacific
217	181	Point	<Null>	<Null>	Canada West Coast	Canada West Coast_120	<Null>	<Null>	<Null>	0	<Null>	50.7143	-124.843	0	0	0	0	0	<Null>	0	0	0	0	0	<Null>	0	0	0	<Null>	<Null>	<Null>	0	<Null>	0	<Null>	0	<Null>	<Null>	<Null>	<Null>	<Null>	<Null>	<Null>	<Null>	<Null>	<Null>	<Null>	<Null>	Geological Survey of Canada - Pacific
218	182	Point	<Null>	<Null>	Canada West Coast	Canada West Coast_121	<Null>	<Null>	<Null>	0	<Null>	50.6674	-124.863	0	0	0	0	0	<Null>	0	0	0	0	0	<Null>	0	0	0	<Null>	<Null>	<Null>	0	<Null>	0	<Null>	0	<Null>	<Null>	<Null>	<Null>	<Null>	<Null>	<Null>	<Null>	<Null>	<Null>	<Null>	<Null>	Geological Survey of Canada - Pacific
219	183	Point	<Null>	<Null>	Canada West Coast	Canada West Coast_122	<Null>	<Null>	<Null>	0	<Null>	50.6626	-124.867	0	0	0	0	0	<Null>	0	0	0	0	0	<Null>	0	0	0	<Null>	<Null>	<Null>	0	<Null>	0	<Null>	0	<Null>	<Null>	<Null>	<Null>	<Null>	<Null>	<Null>	<Null>	<Null>	<Null>	<Null>	<Null>	Geological Survey of Canada - Pacific
220	184	Point	<Null>	<Null>	Canada West Coast	Canada West Coast_123	<Null>	<Null>	<Null>	0	<Null>	50.577	-124.88	0	0	0	0	0	<Null>	0	0	0	0	0	<Null>	0	0	0	<Null>	<Null>	<Null>	0	<Null>	0	<Null>	0	<Null>	<Null>	<Null>	<Null>	<Null>	<Null>	<Null>	<Null>	<Null>	<Null>	<Null>	<Null>	Geological Survey of Canada - Pacific
221	185	Point	<Null>	<Null>	Canada West Coast	Canada West Coast_124	<Null>	<Null>	<Null>	0	<Null>	50.5055	-124.977	0	0	0	0	0	<Null>	0	0	0	0	0	<Null>	0	0	0	<Null>	<Null>	<Null>	0	<Null>	0	<Null>	0	<Null>	<Null>	<Null>	<Null>	<Null>	<Null>	<Null>	<Null>	<Null>	<Null>	<Null>	<Null>	Geological Survey of Canada - Pacific
222	186	Point	<Null>	<Null>	Canada West Coast	Canada West Coast_125	<Null>	<Null>	<Null>	0	<Null>	50.5119	-125.028	0	0	0	0	0	<Null>	0	0	0	0	0	<Null>	0	0	0	<Null>	<Null>	<Null>	0	<Null>	0	<Null>	0	<Null>	<Null>	<Null>	<Null>	<Null>	<Null>	<Null>	<Null>	<Null>	<Null>	<Null>	<Null>	Geological Survey of Canada - Pacific
223	187	Point	<Null>	<Null>	Canada West Coast	Canada West Coast_126	<Null>	<Null>	<Null>	0	<Null>	50.3972	-125.096	0	0	0	0	0	<Null>	0	0	0	0	0	<Null>	0	0	0	<Null>	<Null>	<Null>	0	<Null>	0	<Null>	0	<Null>	<Null>	<Null>	<Null>	<Null>	<Null>	<Null>	<Null>	<Null>	<Null>	<Null>	<Null>	Geological Survey of Canada - Pacific
224	188	Point	<Null>	<Null>	Canada West Coast	Canada West Coast_127	<Null>	<Null>	<Null>	0	<Null>	50.3907	-125.082	0	0	0	0	0	<Null>	0	0	0	0	0	<Null>	0	0	0	<Null>	<Null>	<Null>	0	<Null>	0	<Null>	0	<Null>	<Null>	<Null>	<Null>	<Null>	<Null>	<Null>	<Null>	<Null>	<Null>	<Null>	<Null>	Geological Survey of Canada - Pacific
225	189	Point	<Null>	<Null>	Canada West Coast	Canada West Coast_128	<Null>	<Null>	<Null>	0	<Null>	50.3854	-125.063	0	0	0	0	0	<Null>	0	0	0	0	0	<Null>	0	0	0	<Null>	<Null>	<Null>	0	<Null>	0	<Null>	0	<Null>	<Null>	<Null>	<Null>	<Null>	<Null>	<Null>	<Null>	<Null>	<Null>	<Null>	<Null>	Geological Survey of Canada - Pacific
226	190	Point	<Null>	<Null>	Canada West Coast	Canada West Coast_129	<Null>	<Null>	<Null>	0	<Null>	50.3975	-125.064	0	0	0	0	0	<Null>	0	0	0	0	0	<Null>	0	0	0	<Null>	<Null>	<Null>	0	<Null>	0	<Null>	0	<Null>	<Null>	<Null>	<Null>	<Null>	<Null>	<Null>	<Null>	<Null>	<Null>	<Null>	<Null>	Geological Survey of Canada - Pacific
227	191	Point	<Null>	<Null>	Canada West Coast	Canada West Coast_130	<Null>	<Null>	<Null>	0	<Null>	50.3611	-124.974	0	0	0	0	0	<Null>	0	0	0	0	0	<Null>	0	0	0	<Null>	<Null>	<Null>	0	<Null>	0	<Null>	0	<Null>	<Null>	<Null>	<Null>	<Null>	<Null>	<Null>	<Null>	<Null>	<Null>	<Null>	<Null>	Geological Survey of Canada - Pacific
228	192	Point	<Null>	<Null>	Canada West Coast	Canada West Coast_131	<Null>	<Null>	<Null>	0	<Null>	50.3714	-124.966	0	0	0	0	0	<Null>	0	0	0	0	0	<Null>	0	0	0	<Null>	<Null>	<Null>	0	<Null>	0	<Null>	0	<Null>	<Null>	<Null>	<Null>	<Null>	<Null>	<Null>	<Null>	<Null>	<Null>	<Null>	<Null>	Geological Survey of Canada - Pacific
229	193	Point	<Null>	<Null>	Canada West Coast	Canada West Coast_132	<Null>	<Null>	<Null>	0	<Null>	50.3747	-124.964	0	0	0	0	0	<Null>	0	0	0	0	0	<Null>	0	0	0	<Null>	<Null>	<Null>	0	<Null>	0	<Null>	0	<Null>	<Null>	<Null>	<Null>	<Null>	<Null>	<Null>	<Null>	<Null>	<Null>	<Null>	<Null>	Geological Survey of Canada - Pacific
230	194	Point	<Null>	<Null>	Canada West Coast	Canada West Coast_133	<Null>	<Null>	<Null>	0	<Null>	50.4002	-124.973	0	0	0	0	0	<Null>	0	0	0	0	0	<Null>	0	0	0	<Null>	<Null>	<Null>	0	<Null>	0	<Null>	0	<Null>	<Null>	<Null>	<Null>	<Null>	<Null>	<Null>	<Null>	<Null>	<Null>	<Null>	<Null>	Geological Survey of Canada - Pacific
231	195	Point	<Null>	<Null>	Canada West Coast	Canada West Coast_134	<Null>	<Null>	<Null>	0	<Null>	50.405	-124.975	0	0	0	0	0	<Null>	0	0	0	0	0	<Null>	0	0	0	<Null>	<Null>	<Null>	0	<Null>	0	<Null>	0	<Null>	<Null>	<Null>	<Null>	<Null>	<Null>	<Null>	<Null>	<Null>	<Null>	<Null>	<Null>	Geological Survey of Canada - Pacific
232	196	Point	<Null>	<Null>	Canada West Coast	Canada West Coast_135	<Null>	<Null>	<Null>	0	<Null>	50.4244	-124.984	0	0	0	0	0	<Null>	0	0	0	0	0	<Null>	0	0	0	<Null>	<Null>	<Null>	0	<Null>	0	<Null>	0	<Null>	<Null>	<Null>	<Null>	<Null>	<Null>	<Null>	<Null>	<Null>	<Null>	<Null>	<Null>	Geological Survey of Canada - Pacific
233	197	Point	<Null>	<Null>	Canada West Coast	Canada West Coast_136	<Null>	<Null>	<Null>	0	<Null>	50.4379	-125.004	0	0	0	0	0	<Null>	0	0	0	0	0	<Null>	0	0	0	<Null>	<Null>	<Null>	0	<Null>	0	<Null>	0	<Null>	<Null>	<Null>	<Null>	<Null>	<Null>	<Null>	<Null>	<Null>	<Null>	<Null>	<Null>	Geological Survey of Canada - Pacific
234	198	Point	<Null>	<Null>	Canada West Coast	Canada West Coast_137	<Null>	<Null>	<Null>	0	<Null>	50.3356	-124.965	0	0	0	0	0	<Null>	0	0	0	0	0	<Null>	0	0	0	<Null>	<Null>	<Null>	0	<Null>	0	<Null>	0	<Null>	<Null>	<Null>	<Null>	<Null>	<Null>	<Null>	<Null>	<Null>	<Null>	<Null>	<Null>	Geological Survey of Canada - Pacific
235	199	Point	<Null>	<Null>	Canada West Coast	Canada West Coast_138	<Null>	<Null>	<Null>	0	<Null>	50.2898	-124.852	0	0	0	0	0	<Null>	0	0	0	0	0	<Null>	0	0	0	<Null>	<Null>	<Null>	0	<Null>	0	<Null>	0	<Null>	<Null>	<Null>	<Null>	<Null>	<Null>	<Null>	<Null>	<Null>	<Null>	<Null>	<Null>	Geological Survey of Canada - Pacific
236	200	Point	<Null>	<Null>	Canada West Coast	Canada West Coast_139	<Null>	<Null>	<Null>	0	<Null>	50.2428	-124.639	0	0	0	0	0	<Null>	0	0	0	0	0	<Null>	0	0	0	<Null>	<Null>	<Null>	0	<Null>	0	<Null>	0	<Null>	<Null>	<Null>	<Null>	<Null>	<Null>	<Null>	<Null>	<Null>	<Null>	<Null>	<Null>	Geological Survey of Canada - Pacific
237	201	Point	<Null>	<Null>	Canada West Coast	Canada West Coast_140	<Null>	<Null>	<Null>	0	<Null>	50.2597	-124.646	0	0	0	0	0	<Null>	0	0	0	0	0	<Null>	0	0	0	<Null>	<Null>	<Null>	0	<Null>	0	<Null>	0	<Null>	<Null>	<Null>	<Null>	<Null>	<Null>	<Null>	<Null>	<Null>	<Null>	<Null>	<Null>	Geological Survey of Canada - Pacific
238	202	Point	<Null>	<Null>	Canada West Coast	Canada West Coast_141	<Null>	<Null>	<Null>	0	<Null>	50.3128	-124.699	0	0	0	0	0	<Null>	0	0	0	0	0	<Null>	0	0	0	<Null>	<Null>	<Null>	0	<Null>	0	<Null>	0	<Null>	<Null>	<Null>	<Null>	<Null>	<Null>	<Null>	<Null>	<Null>	<Null>	<Null>	<Null>	Geological Survey of Canada - Pacific
239	203	Point	<Null>	<Null>	Canada West Coast	Canada West Coast_142	<Null>	<Null>	<Null>	0	<Null>	50.2063	-124.63	0	0	0	0	0	<Null>	0	0	0	0	0	<Null>	0	0	0	<Null>	<Null>	<Null>	0	<Null>	0	<Null>	0	<Null>	<Null>	<Null>	<Null>	<Null>	<Null>	<Null>	<Null>	<Null>	<Null>	<Null>	<Null>	Geological Survey of Canada - Pacific
240	204	Point	<Null>	<Null>	Canada West Coast	Canada West Coast_143	<Null>	<Null>	<Null>	0	<Null>	50.213	-124.625	0	0	0	0	0	<Null>	0	0	0	0	0	<Null>	0	0	0	<Null>	<Null>	<Null>	0	<Null>	0	<Null>	0	<Null>	<Null>	<Null>	<Null>	<Null>	<Null>	<Null>	<Null>	<Null>	<Null>	<Null>	<Null>	Geological Survey of Canada - Pacific
241	205	Point	<Null>	<Null>	Canada West Coast	Canada West Coast_144	<Null>	<Null>	<Null>	0	<Null>	50.2229	-124.625	0	0	0	0	0	<Null>	0	0	0	0	0	<Null>	0	0	0	<Null>	<Null>	<Null>	0	<Null>	0	<Null>	0	<Null>	<Null>	<Null>	<Null>	<Null>	<Null>	<Null>	<Null>	<Null>	<Null>	<Null>	<Null>	Geological Survey of Canada - Pacific
242	206	Point	<Null>	<Null>	Canada West Coast	Canada West Coast_145	<Null>	<Null>	<Null>	0	<Null>	50.2439	-124.623	0	0	0	0	0	<Null>	0	0	0	0	0	<Null>	0	0	0	<Null>	<Null>	<Null>	0	<Null>	0	<Null>	0	<Null>	<Null>	<Null>	<Null>	<Null>	<Null>	<Null>	<Null>	<Null>	<Null>	<Null>	<Null>	Geological Survey of Canada - Pacific
243	207	Point	<Null>	<Null>	Canada West Coast	Canada West Coast_146	<Null>	<Null>	<Null>	0	<Null>	50.2359	-124.634	0	0	0	0	0	<Null>	0	0	0	0	0	<Null>	0	0	0	<Null>	<Null>	<Null>	0	<Null>	0	<Null>	0	<Null>	<Null>	<Null>	<Null>	<Null>	<Null>	<Null>	<Null>	<Null>	<Null>	<Null>	<Null>	Geological Survey of Canada - Pacific
244	208	Point	<Null>	<Null>	Canada West Coast	Canada West Coast_147	<Null>	<Null>	<Null>	0	<Null>	50.2724	-124.651	0	0	0	0	0	<Null>	0	0	0	0	0	<Null>	0	0	0	<Null>	<Null>	<Null>	0	<Null>	0	<Null>	0	<Null>	<Null>	<Null>	<Null>	<Null>	<Null>	<Null>	<Null>	<Null>	<Null>	<Null>	<Null>	Geological Survey of Canada - Pacific
245	209	Point	<Null>	<Null>	Canada West Coast	Canada West Coast_148	<Null>	<Null>	<Null>	0	<Null>	50.2887	-124.669	0	0	0	0	0	<Null>	0	0	0	0	0	<Null>	0	0	0	<Null>	<Null>	<Null>	0	<Null>	0	<Null>	0	<Null>	<Null>	<Null>	<Null>	<Null>	<Null>	<Null>	<Null>	<Null>	<Null>	<Null>	<Null>	Geological Survey of Canada - Pacific
246	210	Point	<Null>	<Null>	Canada West Coast	Canada West Coast_149	<Null>	<Null>	<Null>	0	<Null>	50.2824	-124.637	0	0	0	0	0	<Null>	0	0	0	0	0	<Null>	0	0	0	<Null>	<Null>	<Null>	0	<Null>	0	<Null>	0	<Null>	<Null>	<Null>	<Null>	<Null>	<Null>	<Null>	<Null>	<Null>	<Null>	<Null>	<Null>	Geological Survey of Canada - Pacific
247	211	Point	<Null>	<Null>	Canada West Coast	Canada West Coast_150	<Null>	<Null>	<Null>	0	<Null>	50.2901	-124.645	0	0	0	0	0	<Null>	0	0	0	0	0	<Null>	0	0	0	<Null>	<Null>	<Null>	0	<Null>	0	<Null>	0	<Null>	<Null>	<Null>	<Null>	<Null>	<Null>	<Null>	<Null>	<Null>	<Null>	<Null>	<Null>	Geological Survey of Canada - Pacific
248	212	Point	<Null>	<Null>	Canada West Coast	Canada West Coast_151	<Null>	<Null>	<Null>	0	<Null>	50.3162	-124.711	0	0	0	0	0	<Null>	0	0	0	0	0	<Null>	0	0	0	<Null>	<Null>	<Null>	0	<Null>	0	<Null>	0	<Null>	<Null>	<Null>	<Null>	<Null>	<Null>	<Null>	<Null>	<Null>	<Null>	<Null>	<Null>	Geological Survey of Canada - Pacific
249	213	Point	<Null>	<Null>	Canada West Coast	Canada West Coast_152	<Null>	<Null>	<Null>	0	<Null>	50.174	-125.012	0	0	0	0	0	<Null>	0	0	0	0	0	<Null>	0	0	0	<Null>	<Null>	<Null>	0	<Null>	0	<Null>	0	<Null>	<Null>	<Null>	<Null>	<Null>	<Null>	<Null>	<Null>	<Null>	<Null>	<Null>	<Null>	Geological Survey of Canada - Pacific
250	214	Point	<Null>	<Null>	Canada West Coast	Canada West Coast_153	<Null>	<Null>	<Null>	0	<Null>	49.6618	-123.248	0	0	0	0	0	<Null>	0	0	0	0	0	<Null>	0	0	0	<Null>	<Null>	<Null>	0	<Null>	0	<Null>	0	<Null>	<Null>	<Null>	<Null>	<Null>	<Null>	<Null>	<Null>	<Null>	<Null>	<Null>	<Null>	Geological Survey of Canada - Pacific
251	215	Point	<Null>	<Null>	Canada West Coast	Canada West Coast_154	<Null>	<Null>	<Null>	0	<Null>	49.5789	-123.315	0	0	0	0	0	<Null>	0	0	0	0	0	<Null>	0	0	0	<Null>	<Null>	<Null>	0	<Null>	0	<Null>	0	<Null>	<Null>	<Null>	<Null>	<Null>	<Null>	<Null>	<Null>	<Null>	<Null>	<Null>	<Null>	Geological Survey of Canada - Pacific
252	216	Point	<Null>	<Null>	Canada West Coast	Canada West Coast_155	<Null>	<Null>	<Null>	0	<Null>	49.5953	-123.255	0	0	0	0	0	<Null>	0	0	0	0	0	<Null>	0	0	0	<Null>	<Null>	<Null>	0	<Null>	0	<Null>	0	<Null>	<Null>	<Null>	<Null>	<Null>	<Null>	<Null>	<Null>	<Null>	<Null>	<Null>	<Null>	Geological Survey of Canada - Pacific
253	217	Point	<Null>	<Null>	Canada West Coast	Canada West Coast_156	<Null>	<Null>	<Null>	0	<Null>	49.5566	-123.384	0	0	0	0	0	<Null>	0	0	0	0	0	<Null>	0	0	0	<Null>	<Null>	<Null>	0	<Null>	0	<Null>	0	<Null>	<Null>	<Null>	<Null>	<Null>	<Null>	<Null>	<Null>	<Null>	<Null>	<Null>	<Null>	Geological Survey of Canada - Pacific
254	218	Point	<Null>	<Null>	Canada West Coast	Canada West Coast_157	<Null>	<Null>	<Null>	0	<Null>	49.545	-123.415	0	0	0	0	0	<Null>	0	0	0	0	0	<Null>	0	0	0	<Null>	<Null>	<Null>	0	<Null>	0	<Null>	0	<Null>	<Null>	<Null>	<Null>	<Null>	<Null>	<Null>	<Null>	<Null>	<Null>	<Null>	<Null>	Geological Survey of Canada - Pacific
255	219	Point	<Null>	<Null>	Canada West Coast	Canada West Coast_158	<Null>	<Null>	<Null>	0	<Null>	50.105	-123.822	0	0	0	0	0	<Null>	0	0	0	0	0	<Null>	0	0	0	<Null>	<Null>	<Null>	0	<Null>	0	<Null>	0	<Null>	<Null>	<Null>	<Null>	<Null>	<Null>	<Null>	<Null>	<Null>	<Null>	<Null>	<Null>	Geological Survey of Canada - Pacific
256	220	Point	<Null>	<Null>	Canada West Coast	Canada West Coast_159	<Null>	<Null>	<Null>	0	<Null>	50.1217	-123.838	0	0	0	0	0	<Null>	0	0	0	0	0	<Null>	0	0	0	<Null>	<Null>	<Null>	0	<Null>	0	<Null>	0	<Null>	<Null>	<Null>	<Null>	<Null>	<Null>	<Null>	<Null>	<Null>	<Null>	<Null>	<Null>	Geological Survey of Canada - Pacific
257	221	Point	<Null>	<Null>	Canada West Coast	Canada West Coast_160	<Null>	<Null>	<Null>	0	<Null>	48.9958	-125.142	0	0	0	0	0	<Null>	0	0	0	0	0	<Null>	0	0	0	<Null>	<Null>	<Null>	0	<Null>	0	<Null>	0	<Null>	<Null>	<Null>	<Null>	<Null>	<Null>	<Null>	<Null>	<Null>	<Null>	<Null>	<Null>	Geological Survey of Canada - Pacific
258	222	Point	<Null>	<Null>	Canada West Coast	Canada West Coast_161	<Null>	<Null>	<Null>	0	<Null>	50.2275	-125.035	0	0	0	0	0	<Null>	0	0	0	0	0	<Null>	0	0	0	<Null>	<Null>	<Null>	0	<Null>	0	<Null>	0	<Null>	<Null>	<Null>	<Null>	<Null>	<Null>	<Null>	<Null>	<Null>	<Null>	<Null>	<Null>	Geological Survey of Canada - Pacific
259	223	Point	<Null>	<Null>	Canada West Coast	Canada West Coast_162	<Null>	<Null>	<Null>	0	<Null>	50.545	-124.983	0	0	0	0	0	<Null>	0	0	0	0	0	<Null>	0	0	0	<Null>	<Null>	<Null>	0	<Null>	0	<Null>	0	<Null>	<Null>	<Null>	<Null>	<Null>	<Null>	<Null>	<Null>	<Null>	<Null>	<Null>	<Null>	Geological Survey of Canada - Pacific
260	224	Point	<Null>	<Null>	Canada West Coast	Canada West Coast_163	<Null>	<Null>	<Null>	0	<Null>	50.5551	-124.984	0	0	0	0	0	<Null>	0	0	0	0	0	<Null>	0	0	0	<Null>	<Null>	<Null>	0	<Null>	0	<Null>	0	<Null>	<Null>	<Null>	<Null>	<Null>	<Null>	<Null>	<Null>	<Null>	<Null>	<Null>	<Null>	Geological Survey of Canada - Pacific
261	225	Point	<Null>	<Null>	Canada West Coast	Canada West Coast_164	<Null>	<Null>	<Null>	0	<Null>	50.5672	-124.979	0	0	0	0	0	<Null>	0	0	0	0	0	<Null>	0	0	0	<Null>	<Null>	<Null>	0	<Null>	0	<Null>	0	<Null>	<Null>	<Null>	<Null>	<Null>	<Null>	<Null>	<Null>	<Null>	<Null>	<Null>	<Null>	Geological Survey of Canada - Pacific
262	226	Point	<Null>	<Null>	Canada West Coast	Canada West Coast_165	<Null>	<Null>	<Null>	0	<Null>	50.0303	-125.145	0	0	0	0	0	<Null>	0	0	0	0	0	<Null>	0	0	0	<Null>	<Null>	<Null>	0	<Null>	0	<Null>	0	<Null>	<Null>	<Null>	<Null>	<Null>	<Null>	<Null>	<Null>	<Null>	<Null>	<Null>	<Null>	Geological Survey of Canada - Pacific
263	227	Point	<Null>	<Null>	Canada West Coast	Canada West Coast_166	<Null>	<Null>	<Null>	0	<Null>	50.7776	-124.932	0	0	0	0	0	<Null>	0	0	0	0	0	<Null>	0	0	0	<Null>	<Null>	<Null>	0	<Null>	0	<Null>	0	<Null>	<Null>	<Null>	<Null>	<Null>	<Null>	<Null>	<Null>	<Null>	<Null>	<Null>	<Null>	Geological Survey of Canada - Pacific
264	228	Point	<Null>	<Null>	Canada West Coast	Canada West Coast_167	<Null>	<Null>	<Null>	0	<Null>	50.8226	-124.939	0	0	0	0	0	<Null>	0	0	0	0	0	<Null>	0	0	0	<Null>	<Null>	<Null>	0	<Null>	0	<Null>	0	<Null>	<Null>	<Null>	<Null>	<Null>	<Null>	<Null>	<Null>	<Null>	<Null>	<Null>	<Null>	Geological Survey of Canada - Pacific
265	229	Point	<Null>	<Null>	Canada West Coast	Canada West Coast_168	<Null>	<Null>	<Null>	0	<Null>	50.8493	-124.852	0	0	0	0	0	<Null>	0	0	0	0	0	<Null>	0	0	0	<Null>	<Null>	<Null>	0	<Null>	0	<Null>	0	<Null>	<Null>	<Null>	<Null>	<Null>	<Null>	<Null>	<Null>	<Null>	<Null>	<Null>	<Null>	Geological Survey of Canada - Pacific
266	230	Point	<Null>	<Null>	Canada West Coast	Canada West Coast_169	<Null>	<Null>	<Null>	0	<Null>	50.8562	-124.849	0	0	0	0	0	<Null>	0	0	0	0	0	<Null>	0	0	0	<Null>	<Null>	<Null>	0	<Null>	0	<Null>	0	<Null>	<Null>	<Null>	<Null>	<Null>	<Null>	<Null>	<Null>	<Null>	<Null>	<Null>	<Null>	Geological Survey of Canada - Pacific
267	231	Point	<Null>	<Null>	Canada West Coast	Canada West Coast_170	<Null>	<Null>	<Null>	0	<Null>	50.846	-124.851	0	0	0	0	0	<Null>	0	0	0	0	0	<Null>	0	0	0	<Null>	<Null>	<Null>	0	<Null>	0	<Null>	0	<Null>	<Null>	<Null>	<Null>	<Null>	<Null>	<Null>	<Null>	<Null>	<Null>	<Null>	<Null>	Geological Survey of Canada - Pacific
268	232	Point	<Null>	<Null>	Canada West Coast	Canada West Coast_171	<Null>	<Null>	<Null>	0	<Null>	50.8744	-124.835	0	0	0	0	0	<Null>	0	0	0	0	0	<Null>	0	0	0	<Null>	<Null>	<Null>	0	<Null>	0	<Null>	0	<Null>	<Null>	<Null>	<Null>	<Null>	<Null>	<Null>	<Null>	<Null>	<Null>	<Null>	<Null>	Geological Survey of Canada - Pacific
269	233	Point	<Null>	<Null>	Canada West Coast	Canada West Coast_172	<Null>	<Null>	<Null>	0	<Null>	50.8704	-124.844	0	0	0	0	0	<Null>	0	0	0	0	0	<Null>	0	0	0	<Null>	<Null>	<Null>	0	<Null>	0	<Null>	0	<Null>	<Null>	<Null>	<Null>	<Null>	<Null>	<Null>	<Null>	<Null>	<Null>	<Null>	<Null>	Geological Survey of Canada - Pacific
270	234	Point	<Null>	<Null>	Canada West Coast	Canada West Coast_173	<Null>	<Null>	<Null>	0	<Null>	50.838	-124.859	0	0	0	0	0	<Null>	0	0	0	0	0	<Null>	0	0	0	<Null>	<Null>	<Null>	0	<Null>	0	<Null>	0	<Null>	<Null>	<Null>	<Null>	<Null>	<Null>	<Null>	<Null>	<Null>	<Null>	<Null>	<Null>	Geological Survey of Canada - Pacific
271	235	Point	<Null>	<Null>	Canada West Coast	Canada West Coast_174	<Null>	<Null>	<Null>	0	<Null>	50.8342	-124.864	0	0	0	0	0	<Null>	0	0	0	0	0	<Null>	0	0	0	<Null>	<Null>	<Null>	0	<Null>	0	<Null>	0	<Null>	<Null>	<Null>	<Null>	<Null>	<Null>	<Null>	<Null>	<Null>	<Null>	<Null>	<Null>	Geological Survey of Canada - Pacific
272	236	Point	<Null>	<Null>	Canada West Coast	Canada West Coast_175	<Null>	<Null>	<Null>	0	<Null>	50.8325	-124.866	0	0	0	0	0	<Null>	0	0	0	0	0	<Null>	0	0	0	<Null>	<Null>	<Null>	0	<Null>	0	<Null>	0	<Null>	<Null>	<Null>	<Null>	<Null>	<Null>	<Null>	<Null>	<Null>	<Null>	<Null>	<Null>	Geological Survey of Canada - Pacific
273	237	Point	<Null>	<Null>	Canada West Coast	Canada West Coast_176	<Null>	<Null>	<Null>	0	<Null>	50.5904	-124.883	0	0	0	0	0	<Null>	0	0	0	0	0	<Null>	0	0	0	<Null>	<Null>	<Null>	0	<Null>	0	<Null>	0	<Null>	<Null>	<Null>	<Null>	<Null>	<Null>	<Null>	<Null>	<Null>	<Null>	<Null>	<Null>	Geological Survey of Canada - Pacific
274	238	Point	<Null>	<Null>	Canada West Coast	Canada West Coast_177	<Null>	<Null>	<Null>	0	<Null>	50.6543	-124.908	0	0	0	0	0	<Null>	0	0	0	0	0	<Null>	0	0	0	<Null>	<Null>	<Null>	0	<Null>	0	<Null>	0	<Null>	<Null>	<Null>	<Null>	<Null>	<Null>	<Null>	<Null>	<Null>	<Null>	<Null>	<Null>	Geological Survey of Canada - Pacific
275	239	Point	<Null>	<Null>	Canada West Coast	Canada West Coast_178	<Null>	<Null>	<Null>	0	<Null>	50.6846	-124.904	0	0	0	0	0	<Null>	0	0	0	0	0	<Null>	0	0	0	<Null>	<Null>	<Null>	0	<Null>	0	<Null>	0	<Null>	<Null>	<Null>	<Null>	<Null>	<Null>	<Null>	<Null>	<Null>	<Null>	<Null>	<Null>	Geological Survey of Canada - Pacific
276	240	Point	<Null>	<Null>	Canada West Coast	Canada West Coast_179	<Null>	<Null>	<Null>	0	<Null>	50.7051	-124.845	0	0	0	0	0	<Null>	0	0	0	0	0	<Null>	0	0	0	<Null>	<Null>	<Null>	0	<Null>	0	<Null>	0	<Null>	<Null>	<Null>	<Null>	<Null>	<Null>	<Null>	<Null>	<Null>	<Null>	<Null>	<Null>	Geological Survey of Canada - Pacific
277	241	Point	<Null>	<Null>	Canada West Coast	Canada West Coast_180	<Null>	<Null>	<Null>	0	<Null>	50.6875	-124.87	0	0	0	0	0	<Null>	0	0	0	0	0	<Null>	0	0	0	<Null>	<Null>	<Null>	0	<Null>	0	<Null>	0	<Null>	<Null>	<Null>	<Null>	<Null>	<Null>	<Null>	<Null>	<Null>	<Null>	<Null>	<Null>	Geological Survey of Canada - Pacific
278	242	Point	<Null>	<Null>	Canada West Coast	Canada West Coast_181	<Null>	<Null>	<Null>	0	<Null>	50.8553	-124.853	0	0	0	0	0	<Null>	0	0	0	0	0	<Null>	0	0	0	<Null>	<Null>	<Null>	0	<Null>	0	<Null>	0	<Null>	<Null>	<Null>	<Null>	<Null>	<Null>	<Null>	<Null>	<Null>	<Null>	<Null>	<Null>	Geological Survey of Canada - Pacific
279	243	Point	<Null>	<Null>	Canada West Coast	Canada West Coast_182	<Null>	<Null>	<Null>	0	<Null>	50.8529	-124.85	0	0	0	0	0	<Null>	0	0	0	0	0	<Null>	0	0	0	<Null>	<Null>	<Null>	0	<Null>	0	<Null>	0	<Null>	<Null>	<Null>	<Null>	<Null>	<Null>	<Null>	<Null>	<Null>	<Null>	<Null>	<Null>	Geological Survey of Canada - Pacific
280	244	Point	<Null>	<Null>	Canada West Coast	Canada West Coast_183	<Null>	<Null>	<Null>	0	<Null>	50.8588	-124.848	0	0	0	0	0	<Null>	0	0	0	0	0	<Null>	0	0	0	<Null>	<Null>	<Null>	0	<Null>	0	<Null>	0	<Null>	<Null>	<Null>	<Null>	<Null>	<Null>	<Null>	<Null>	<Null>	<Null>	<Null>	<Null>	Geological Survey of Canada - Pacific
281	245	Point	<Null>	<Null>	Canada West Coast	Canada West Coast_184	<Null>	<Null>	<Null>	0	<Null>	50.5659	-124.891	0	0	0	0	0	<Null>	0	0	0	0	0	<Null>	0	0	0	<Null>	<Null>	<Null>	0	<Null>	0	<Null>	0	<Null>	<Null>	<Null>	<Null>	<Null>	<Null>	<Null>	<Null>	<Null>	<Null>	<Null>	<Null>	Geological Survey of Canada - Pacific
282	246	Point	<Null>	<Null>	Canada West Coast	Canada West Coast_185	<Null>	<Null>	<Null>	0	<Null>	50.5342	-124.946	0	0	0	0	0	<Null>	0	0	0	0	0	<Null>	0	0	0	<Null>	<Null>	<Null>	0	<Null>	0	<Null>	0	<Null>	<Null>	<Null>	<Null>	<Null>	<Null>	<Null>	<Null>	<Null>	<Null>	<Null>	<Null>	Geological Survey of Canada - Pacific
283	247	Point	<Null>	<Null>	Canada West Coast	Canada West Coast_186	<Null>	<Null>	<Null>	0	<Null>	50.0717	-125.086	0	0	0	0	0	<Null>	0	0	0	0	0	<Null>	0	0	0	<Null>	<Null>	<Null>	0	<Null>	0	<Null>	0	<Null>	<Null>	<Null>	<Null>	<Null>	<Null>	<Null>	<Null>	<Null>	<Null>	<Null>	<Null>	Geological Survey of Canada - Pacific
284	248	Point	<Null>	<Null>	Canada West Coast	Canada West Coast_187	<Null>	<Null>	<Null>	0	<Null>	50.1113	-125.189	0	0	0	0	0	<Null>	0	0	0	0	0	<Null>	0	0	0	<Null>	<Null>	<Null>	0	<Null>	0	<Null>	0	<Null>	<Null>	<Null>	<Null>	<Null>	<Null>	<Null>	<Null>	<Null>	<Null>	<Null>	<Null>	Geological Survey of Canada - Pacific
285	249	Point	<Null>	<Null>	Canada West Coast	Canada West Coast_188	<Null>	<Null>	<Null>	0	<Null>	50.1071	-125.183	0	0	0	0	0	<Null>	0	0	0	0	0	<Null>	0	0	0	<Null>	<Null>	<Null>	0	<Null>	0	<Null>	0	<Null>	<Null>	<Null>	<Null>	<Null>	<Null>	<Null>	<Null>	<Null>	<Null>	<Null>	<Null>	Geological Survey of Canada - Pacific
286	250	Point	<Null>	<Null>	Canada West Coast	Canada West Coast_189	<Null>	<Null>	<Null>	0	<Null>	50.106	-125.179	0	0	0	0	0	<Null>	0	0	0	0	0	<Null>	0	0	0	<Null>	<Null>	<Null>	0	<Null>	0	<Null>	0	<Null>	<Null>	<Null>	<Null>	<Null>	<Null>	<Null>	<Null>	<Null>	<Null>	<Null>	<Null>	Geological Survey of Canada - Pacific
287	251	Point	<Null>	<Null>	Canada West Coast	Canada West Coast_190	<Null>	<Null>	<Null>	0	<Null>	50.0963	-125.168	0	0	0	0	0	<Null>	0	0	0	0	0	<Null>	0	0	0	<Null>	<Null>	<Null>	0	<Null>	0	<Null>	0	<Null>	<Null>	<Null>	<Null>	<Null>	<Null>	<Null>	<Null>	<Null>	<Null>	<Null>	<Null>	Geological Survey of Canada - Pacific
288	252	Point	<Null>	<Null>	Canada West Coast	Canada West Coast_191	<Null>	<Null>	<Null>	0	<Null>	49.7881	-124.503	0	0	0	0	0	<Null>	0	0	0	0	0	<Null>	0	0	0	<Null>	<Null>	<Null>	0	<Null>	0	<Null>	0	<Null>	<Null>	<Null>	<Null>	<Null>	<Null>	<Null>	<Null>	<Null>	<Null>	<Null>	<Null>	Geological Survey of Canada - Pacific
289	253	Point	<Null>	<Null>	Canada West Coast	Canada West Coast_192	<Null>	<Null>	<Null>	0	<Null>	49.4212	-123.241	0	0	0	0	0	<Null>	0	0	0	0	0	<Null>	0	0	0	<Null>	<Null>	<Null>	0	<Null>	0	<Null>	0	<Null>	<Null>	<Null>	<Null>	<Null>	<Null>	<Null>	<Null>	<Null>	<Null>	<Null>	<Null>	Geological Survey of Canada - Pacific
290	254	Point	<Null>	<Null>	Canada West Coast	Canada West Coast_193	<Null>	<Null>	<Null>	0	<Null>	49.3955	-123.264	0	0	0	0	0	<Null>	0	0	0	0	0	<Null>	0	0	0	<Null>	<Null>	<Null>	0	<Null>	0	<Null>	0	<Null>	<Null>	<Null>	<Null>	<Null>	<Null>	<Null>	<Null>	<Null>	<Null>	<Null>	<Null>	Geological Survey of Canada - Pacific
291	255	Point	<Null>	<Null>	Canada West Coast	Canada West Coast_194	<Null>	<Null>	<Null>	0	<Null>	49.5162	-123.266	0	0	0	0	0	<Null>	0	0	0	0	0	<Null>	0	0	0	<Null>	<Null>	<Null>	0	<Null>	0	<Null>	0	<Null>	<Null>	<Null>	<Null>	<Null>	<Null>	<Null>	<Null>	<Null>	<Null>	<Null>	<Null>	Geological Survey of Canada - Pacific
292	256	Point	<Null>	<Null>	Canada West Coast	Canada West Coast_195	<Null>	<Null>	<Null>	0	<Null>	49.5218	-123.265	0	0	0	0	0	<Null>	0	0	0	0	0	<Null>	0	0	0	<Null>	<Null>	<Null>	0	<Null>	0	<Null>	0	<Null>	<Null>	<Null>	<Null>	<Null>	<Null>	<Null>	<Null>	<Null>	<Null>	<Null>	<Null>	Geological Survey of Canada - Pacific
293	257	Point	<Null>	<Null>	Canada West Coast	Canada West Coast_196	<Null>	<Null>	<Null>	0	<Null>	49.5003	-123.255	0	0	0	0	0	<Null>	0	0	0	0	0	<Null>	0	0	0	<Null>	<Null>	<Null>	0	<Null>	0	<Null>	0	<Null>	<Null>	<Null>	<Null>	<Null>	<Null>	<Null>	<Null>	<Null>	<Null>	<Null>	<Null>	Geological Survey of Canada - Pacific
294	258	Point	<Null>	<Null>	Canada West Coast	Canada West Coast_197	<Null>	<Null>	<Null>	0	<Null>	49.535	-123.258	0	0	0	0	0	<Null>	0	0	0	0	0	<Null>	0	0	0	<Null>	<Null>	<Null>	0	<Null>	0	<Null>	0	<Null>	<Null>	<Null>	<Null>	<Null>	<Null>	<Null>	<Null>	<Null>	<Null>	<Null>	<Null>	Geological Survey of Canada - Pacific
295	259	Point	<Null>	<Null>	Canada West Coast	Canada West Coast_198	<Null>	<Null>	<Null>	0	<Null>	49.5258	-123.264	0	0	0	0	0	<Null>	0	0	0	0	0	<Null>	0	0	0	<Null>	<Null>	<Null>	0	<Null>	0	<Null>	0	<Null>	<Null>	<Null>	<Null>	<Null>	<Null>	<Null>	<Null>	<Null>	<Null>	<Null>	<Null>	Geological Survey of Canada - Pacific
296	260	Point	<Null>	<Null>	Canada West Coast	Canada West Coast_199	<Null>	<Null>	<Null>	0	<Null>	49.4793	-123.251	0	0	0	0	0	<Null>	0	0	0	0	0	<Null>	0	0	0	<Null>	<Null>	<Null>	0	<Null>	0	<Null>	0	<Null>	<Null>	<Null>	<Null>	<Null>	<Null>	<Null>	<Null>	<Null>	<Null>	<Null>	<Null>	Geological Survey of Canada - Pacific
297	261	Point	<Null>	<Null>	Canada West Coast	Canada West Coast_200	<Null>	<Null>	<Null>	0	<Null>	49.4885	-123.252	0	0	0	0	0	<Null>	0	0	0	0	0	<Null>	0	0	0	<Null>	<Null>	<Null>	0	<Null>	0	<Null>	0	<Null>	<Null>	<Null>	<Null>	<Null>	<Null>	<Null>	<Null>	<Null>	<Null>	<Null>	<Null>	Geological Survey of Canada - Pacific
298	262	Point	<Null>	<Null>	Canada West Coast	Canada West Coast_201	<Null>	<Null>	<Null>	0	<Null>	49.6224	-123.222	0	0	0	0	0	<Null>	0	0	0	0	0	<Null>	0	0	0	<Null>	<Null>	<Null>	0	<Null>	0	<Null>	0	<Null>	<Null>	<Null>	<Null>	<Null>	<Null>	<Null>	<Null>	<Null>	<Null>	<Null>	<Null>	Geological Survey of Canada - Pacific
299	263	Point	<Null>	<Null>	Canada West Coast	Canada West Coast_202	<Null>	<Null>	<Null>	0	<Null>	49.6738	-123.184	0	0	0	0	0	<Null>	0	0	0	0	0	<Null>	0	0	0	<Null>	<Null>	<Null>	0	<Null>	0	<Null>	0	<Null>	<Null>	<Null>	<Null>	<Null>	<Null>	<Null>	<Null>	<Null>	<Null>	<Null>	<Null>	Geological Survey of Canada - Pacific
300	264	Point	<Null>	<Null>	Canada West Coast	Canada West Coast_203	<Null>	<Null>	<Null>	0	<Null>	49.659	-123.213	0	0	0	0	0	<Null>	0	0	0	0	0	<Null>	0	0	0	<Null>	<Null>	<Null>	0	<Null>	0	<Null>	0	<Null>	<Null>	<Null>	<Null>	<Null>	<Null>	<Null>	<Null>	<Null>	<Null>	<Null>	<Null>	Geological Survey of Canada - Pacific
301	265	Point	<Null>	<Null>	Canada West Coast	Canada West Coast_204	<Null>	<Null>	<Null>	0	<Null>	49.571	-123.267	0	0	0	0	0	<Null>	0	0	0	0	0	<Null>	0	0	0	<Null>	<Null>	<Null>	0	<Null>	0	<Null>	0	<Null>	<Null>	<Null>	<Null>	<Null>	<Null>	<Null>	<Null>	<Null>	<Null>	<Null>	<Null>	Geological Survey of Canada - Pacific
302	266	Point	<Null>	<Null>	Canada West Coast	Canada West Coast_205	<Null>	<Null>	<Null>	0	<Null>	49.5632	-123.261	0	0	0	0	0	<Null>	0	0	0	0	0	<Null>	0	0	0	<Null>	<Null>	<Null>	0	<Null>	0	<Null>	0	<Null>	<Null>	<Null>	<Null>	<Null>	<Null>	<Null>	<Null>	<Null>	<Null>	<Null>	<Null>	Geological Survey of Canada - Pacific
303	267	Point	<Null>	<Null>	Canada West Coast	Canada West Coast_206	<Null>	<Null>	<Null>	0	<Null>	49.567	-123.255	0	0	0	0	0	<Null>	0	0	0	0	0	<Null>	0	0	0	<Null>	<Null>	<Null>	0	<Null>	0	<Null>	0	<Null>	<Null>	<Null>	<Null>	<Null>	<Null>	<Null>	<Null>	<Null>	<Null>	<Null>	<Null>	Geological Survey of Canada - Pacific
304	268	Point	<Null>	<Null>	Canada West Coast	Canada West Coast_207	<Null>	<Null>	<Null>	0	<Null>	49.5552	-123.31	0	0	0	0	0	<Null>	0	0	0	0	0	<Null>	0	0	0	<Null>	<Null>	<Null>	0	<Null>	0	<Null>	0	<Null>	<Null>	<Null>	<Null>	<Null>	<Null>	<Null>	<Null>	<Null>	<Null>	<Null>	<Null>	Geological Survey of Canada - Pacific
305	269	Point	<Null>	<Null>	Canada West Coast	Canada West Coast_208	<Null>	<Null>	<Null>	0	<Null>	49.4537	-123.463	0	0	0	0	0	<Null>	0	0	0	0	0	<Null>	0	0	0	<Null>	<Null>	<Null>	0	<Null>	0	<Null>	0	<Null>	<Null>	<Null>	<Null>	<Null>	<Null>	<Null>	<Null>	<Null>	<Null>	<Null>	<Null>	Geological Survey of Canada - Pacific
306	270	Point	<Null>	<Null>	Canada West Coast	Canada West Coast_209	<Null>	<Null>	<Null>	0	<Null>	49.4503	-123.463	0	0	0	0	0	<Null>	0	0	0	0	0	<Null>	0	0	0	<Null>	<Null>	<Null>	0	<Null>	0	<Null>	0	<Null>	<Null>	<Null>	<Null>	<Null>	<Null>	<Null>	<Null>	<Null>	<Null>	<Null>	<Null>	Geological Survey of Canada - Pacific
307	271	Point	<Null>	<Null>	Canada West Coast	Canada West Coast_210	<Null>	<Null>	<Null>	0	<Null>	49.4588	-123.467	0	0	0	0	0	<Null>	0	0	0	0	0	<Null>	0	0	0	<Null>	<Null>	<Null>	0	<Null>	0	<Null>	0	<Null>	<Null>	<Null>	<Null>	<Null>	<Null>	<Null>	<Null>	<Null>	<Null>	<Null>	<Null>	Geological Survey of Canada - Pacific
308	272	Point	<Null>	<Null>	Canada West Coast	Canada West Coast_211	<Null>	<Null>	<Null>	0	<Null>	49.4942	-123.45	0	0	0	0	0	<Null>	0	0	0	0	0	<Null>	0	0	0	<Null>	<Null>	<Null>	0	<Null>	0	<Null>	0	<Null>	<Null>	<Null>	<Null>	<Null>	<Null>	<Null>	<Null>	<Null>	<Null>	<Null>	<Null>	Geological Survey of Canada - Pacific
309	273	Point	<Null>	<Null>	Canada West Coast	Canada West Coast_212	<Null>	<Null>	<Null>	0	<Null>	49.5736	-123.243	0	0	0	0	0	<Null>	0	0	0	0	0	<Null>	0	0	0	<Null>	<Null>	<Null>	0	<Null>	0	<Null>	0	<Null>	<Null>	<Null>	<Null>	<Null>	<Null>	<Null>	<Null>	<Null>	<Null>	<Null>	<Null>	Geological Survey of Canada - Pacific
310	274	Point	<Null>	<Null>	Canada West Coast	Canada West Coast_213	<Null>	<Null>	<Null>	0	<Null>	49.8141	-123.913	0	0	0	0	0	<Null>	0	0	0	0	0	<Null>	0	0	0	<Null>	<Null>	<Null>	0	<Null>	0	<Null>	0	<Null>	<Null>	<Null>	<Null>	<Null>	<Null>	<Null>	<Null>	<Null>	<Null>	<Null>	<Null>	Geological Survey of Canada - Pacific
311	275	Point	<Null>	<Null>	Canada West Coast	Canada West Coast_214	<Null>	<Null>	<Null>	0	<Null>	49.8275	-123.897	0	0	0	0	0	<Null>	0	0	0	0	0	<Null>	0	0	0	<Null>	<Null>	<Null>	0	<Null>	0	<Null>	0	<Null>	<Null>	<Null>	<Null>	<Null>	<Null>	<Null>	<Null>	<Null>	<Null>	<Null>	<Null>	Geological Survey of Canada - Pacific
312	276	Point	<Null>	<Null>	Canada West Coast	Canada West Coast_215	<Null>	<Null>	<Null>	0	<Null>	50.0044	-123.945	0	0	0	0	0	<Null>	0	0	0	0	0	<Null>	0	0	0	<Null>	<Null>	<Null>	0	<Null>	0	<Null>	0	<Null>	<Null>	<Null>	<Null>	<Null>	<Null>	<Null>	<Null>	<Null>	<Null>	<Null>	<Null>	Geological Survey of Canada - Pacific
313	277	Point	<Null>	<Null>	Canada West Coast	Canada West Coast_216	<Null>	<Null>	<Null>	0	<Null>	49.5159	-123.481	0	0	0	0	0	<Null>	0	0	0	0	0	<Null>	0	0	0	<Null>	<Null>	<Null>	0	<Null>	0	<Null>	0	<Null>	<Null>	<Null>	<Null>	<Null>	<Null>	<Null>	<Null>	<Null>	<Null>	<Null>	<Null>	Geological Survey of Canada - Pacific
314	278	Point	<Null>	<Null>	Canada West Coast	Canada West Coast_217	<Null>	<Null>	<Null>	0	<Null>	49.5297	-123.461	0	0	0	0	0	<Null>	0	0	0	0	0	<Null>	0	0	0	<Null>	<Null>	<Null>	0	<Null>	0	<Null>	0	<Null>	<Null>	<Null>	<Null>	<Null>	<Null>	<Null>	<Null>	<Null>	<Null>	<Null>	<Null>	Geological Survey of Canada - Pacific
315	279	Point	<Null>	<Null>	Canada West Coast	Canada West Coast_218	<Null>	<Null>	<Null>	0	<Null>	49.4921	-123.47	0	0	0	0	0	<Null>	0	0	0	0	0	<Null>	0	0	0	<Null>	<Null>	<Null>	0	<Null>	0	<Null>	0	<Null>	<Null>	<Null>	<Null>	<Null>	<Null>	<Null>	<Null>	<Null>	<Null>	<Null>	<Null>	Geological Survey of Canada - Pacific
316	280	Point	<Null>	<Null>	Canada West Coast	Canada West Coast_219	<Null>	<Null>	<Null>	0	<Null>	49.4709	-123.476	0	0	0	0	0	<Null>	0	0	0	0	0	<Null>	0	0	0	<Null>	<Null>	<Null>	0	<Null>	0	<Null>	0	<Null>	<Null>	<Null>	<Null>	<Null>	<Null>	<Null>	<Null>	<Null>	<Null>	<Null>	<Null>	Geological Survey of Canada - Pacific
317	281	Point	<Null>	<Null>	Canada West Coast	Canada West Coast_220	<Null>	<Null>	<Null>	0	<Null>	49.4692	-123.46	0	0	0	0	0	<Null>	0	0	0	0	0	<Null>	0	0	0	<Null>	<Null>	<Null>	0	<Null>	0	<Null>	0	<Null>	<Null>	<Null>	<Null>	<Null>	<Null>	<Null>	<Null>	<Null>	<Null>	<Null>	<Null>	Geological Survey of Canada - Pacific
318	282	Point	<Null>	<Null>	Canada West Coast	Canada West Coast_221	<Null>	<Null>	<Null>	0	<Null>	49.4595	-123.454	0	0	0	0	0	<Null>	0	0	0	0	0	<Null>	0	0	0	<Null>	<Null>	<Null>	0	<Null>	0	<Null>	0	<Null>	<Null>	<Null>	<Null>	<Null>	<Null>	<Null>	<Null>	<Null>	<Null>	<Null>	<Null>	Geological Survey of Canada - Pacific
319	283	Point	<Null>	<Null>	Canada West Coast	Canada West Coast_222	<Null>	<Null>	<Null>	0	<Null>	49.4303	-123.469	0	0	0	0	0	<Null>	0	0	0	0	0	<Null>	0	0	0	<Null>	<Null>	<Null>	0	<Null>	0	<Null>	0	<Null>	<Null>	<Null>	<Null>	<Null>	<Null>	<Null>	<Null>	<Null>	<Null>	<Null>	<Null>	Geological Survey of Canada - Pacific
320	284	Point	<Null>	<Null>	Canada West Coast	Canada West Coast_223	<Null>	<Null>	<Null>	0	<Null>	49.5363	-123.447	0	0	0	0	0	<Null>	0	0	0	0	0	<Null>	0	0	0	<Null>	<Null>	<Null>	0	<Null>	0	<Null>	0	<Null>	<Null>	<Null>	<Null>	<Null>	<Null>	<Null>	<Null>	<Null>	<Null>	<Null>	<Null>	Geological Survey of Canada - Pacific
321	285	Point	<Null>	<Null>	Canada West Coast	Canada West Coast_224	<Null>	<Null>	<Null>	0	<Null>	49.6464	-123.257	0	0	0	0	0	<Null>	0	0	0	0	0	<Null>	0	0	0	<Null>	<Null>	<Null>	0	<Null>	0	<Null>	0	<Null>	<Null>	<Null>	<Null>	<Null>	<Null>	<Null>	<Null>	<Null>	<Null>	<Null>	<Null>	Geological Survey of Canada - Pacific
322	286	Point	<Null>	<Null>	Canada West Coast	Canada West Coast_225	<Null>	<Null>	<Null>	0	<Null>	49.6442	-123.257	0	0	0	0	0	<Null>	0	0	0	0	0	<Null>	0	0	0	<Null>	<Null>	<Null>	0	<Null>	0	<Null>	0	<Null>	<Null>	<Null>	<Null>	<Null>	<Null>	<Null>	<Null>	<Null>	<Null>	<Null>	<Null>	Geological Survey of Canada - Pacific
323	287	Point	<Null>	<Null>	Canada West Coast	Canada West Coast_226	<Null>	<Null>	<Null>	0	<Null>	49.6431	-123.256	0	0	0	0	0	<Null>	0	0	0	0	0	<Null>	0	0	0	<Null>	<Null>	<Null>	0	<Null>	0	<Null>	0	<Null>	<Null>	<Null>	<Null>	<Null>	<Null>	<Null>	<Null>	<Null>	<Null>	<Null>	<Null>	Geological Survey of Canada - Pacific
324	288	Point	<Null>	<Null>	Canada West Coast	Canada West Coast_227	<Null>	<Null>	<Null>	0	<Null>	49.5091	-123.337	0	0	0	0	0	<Null>	0	0	0	0	0	<Null>	0	0	0	<Null>	<Null>	<Null>	0	<Null>	0	<Null>	0	<Null>	<Null>	<Null>	<Null>	<Null>	<Null>	<Null>	<Null>	<Null>	<Null>	<Null>	<Null>	Geological Survey of Canada - Pacific
325	289	Point	<Null>	<Null>	Canada West Coast	Canada West Coast_228	<Null>	<Null>	<Null>	0	<Null>	49.5206	-123.279	0	0	0	0	0	<Null>	0	0	0	0	0	<Null>	0	0	0	<Null>	<Null>	<Null>	0	<Null>	0	<Null>	0	<Null>	<Null>	<Null>	<Null>	<Null>	<Null>	<Null>	<Null>	<Null>	<Null>	<Null>	<Null>	Geological Survey of Canada - Pacific
326	290	Point	<Null>	<Null>	Canada West Coast	Canada West Coast_229	<Null>	<Null>	<Null>	0	<Null>	49.543	-123.287	0	0	0	0	0	<Null>	0	0	0	0	0	<Null>	0	0	0	<Null>	<Null>	<Null>	0	<Null>	0	<Null>	0	<Null>	<Null>	<Null>	<Null>	<Null>	<Null>	<Null>	<Null>	<Null>	<Null>	<Null>	<Null>	Geological Survey of Canada - Pacific
327	291	Point	<Null>	<Null>	Canada West Coast	Canada West Coast_230	<Null>	<Null>	<Null>	0	<Null>	49.5457	-123.291	0	0	0	0	0	<Null>	0	0	0	0	0	<Null>	0	0	0	<Null>	<Null>	<Null>	0	<Null>	0	<Null>	0	<Null>	<Null>	<Null>	<Null>	<Null>	<Null>	<Null>	<Null>	<Null>	<Null>	<Null>	<Null>	Geological Survey of Canada - Pacific
328	292	Point	<Null>	<Null>	Canada West Coast	Canada West Coast_231	<Null>	<Null>	<Null>	0	<Null>	49.881	-124.059	0	0	0	0	0	<Null>	0	0	0	0	0	<Null>	0	0	0	<Null>	<Null>	<Null>	0	<Null>	0	<Null>	0	<Null>	<Null>	<Null>	<Null>	<Null>	<Null>	<Null>	<Null>	<Null>	<Null>	<Null>	<Null>	Geological Survey of Canada - Pacific
329	293	Point	<Null>	<Null>	Canada West Coast	Canada West Coast_232	<Null>	<Null>	<Null>	0	<Null>	49.9071	-124.046	0	0	0	0	0	<Null>	0	0	0	0	0	<Null>	0	0	0	<Null>	<Null>	<Null>	0	<Null>	0	<Null>	0	<Null>	<Null>	<Null>	<Null>	<Null>	<Null>	<Null>	<Null>	<Null>	<Null>	<Null>	<Null>	Geological Survey of Canada - Pacific
330	294	Point	<Null>	<Null>	Canada West Coast	Canada West Coast_233	<Null>	<Null>	<Null>	0	<Null>	49.9099	-124.044	0	0	0	0	0	<Null>	0	0	0	0	0	<Null>	0	0	0	<Null>	<Null>	<Null>	0	<Null>	0	<Null>	0	<Null>	<Null>	<Null>	<Null>	<Null>	<Null>	<Null>	<Null>	<Null>	<Null>	<Null>	<Null>	Geological Survey of Canada - Pacific
331	295	Point	<Null>	<Null>	Canada West Coast	Canada West Coast_234	<Null>	<Null>	<Null>	0	<Null>	49.9135	-124.043	0	0	0	0	0	<Null>	0	0	0	0	0	<Null>	0	0	0	<Null>	<Null>	<Null>	0	<Null>	0	<Null>	0	<Null>	<Null>	<Null>	<Null>	<Null>	<Null>	<Null>	<Null>	<Null>	<Null>	<Null>	<Null>	Geological Survey of Canada - Pacific
332	296	Point	<Null>	<Null>	Canada West Coast	Canada West Coast_235	<Null>	<Null>	<Null>	0	<Null>	49.9074	-124.022	0	0	0	0	0	<Null>	0	0	0	0	0	<Null>	0	0	0	<Null>	<Null>	<Null>	0	<Null>	0	<Null>	0	<Null>	<Null>	<Null>	<Null>	<Null>	<Null>	<Null>	<Null>	<Null>	<Null>	<Null>	<Null>	Geological Survey of Canada - Pacific
333	297	Point	<Null>	<Null>	Canada West Coast	Canada West Coast_236	<Null>	<Null>	<Null>	0	<Null>	49.9895	-123.998	0	0	0	0	0	<Null>	0	0	0	0	0	<Null>	0	0	0	<Null>	<Null>	<Null>	0	<Null>	0	<Null>	0	<Null>	<Null>	<Null>	<Null>	<Null>	<Null>	<Null>	<Null>	<Null>	<Null>	<Null>	<Null>	Geological Survey of Canada - Pacific
334	298	Point	<Null>	<Null>	Canada West Coast	Canada West Coast_237	<Null>	<Null>	<Null>	0	<Null>	49.0314	-125.155	0	0	0	0	0	<Null>	0	0	0	0	0	<Null>	0	0	0	<Null>	<Null>	<Null>	0	<Null>	0	<Null>	0	<Null>	<Null>	<Null>	<Null>	<Null>	<Null>	<Null>	<Null>	<Null>	<Null>	<Null>	<Null>	Geological Survey of Canada - Pacific
335	299	Point	<Null>	<Null>	Canada West Coast	Canada West Coast_238	<Null>	<Null>	<Null>	0	<Null>	49.0246	-125.158	0	0	0	0	0	<Null>	0	0	0	0	0	<Null>	0	0	0	<Null>	<Null>	<Null>	0	<Null>	0	<Null>	0	<Null>	<Null>	<Null>	<Null>	<Null>	<Null>	<Null>	<Null>	<Null>	<Null>	<Null>	<Null>	Geological Survey of Canada - Pacific
336	300	Point	<Null>	<Null>	Canada West Coast	Canada West Coast_239	<Null>	<Null>	<Null>	0	<Null>	48.9836	-124.949	0	0	0	0	0	<Null>	0	0	0	0	0	<Null>	0	0	0	<Null>	<Null>	<Null>	0	<Null>	0	<Null>	0	<Null>	<Null>	<Null>	<Null>	<Null>	<Null>	<Null>	<Null>	<Null>	<Null>	<Null>	<Null>	Geological Survey of Canada - Pacific
337	301	Point	<Null>	<Null>	Canada West Coast	Canada West Coast_240	<Null>	<Null>	<Null>	0	<Null>	48.9897	-124.899	0	0	0	0	0	<Null>	0	0	0	0	0	<Null>	0	0	0	<Null>	<Null>	<Null>	0	<Null>	0	<Null>	0	<Null>	<Null>	<Null>	<Null>	<Null>	<Null>	<Null>	<Null>	<Null>	<Null>	<Null>	<Null>	Geological Survey of Canada - Pacific
338	302	Point	<Null>	<Null>	Canada West Coast	Canada West Coast_241	<Null>	<Null>	<Null>	0	<Null>	48.9931	-124.887	0	0	0	0	0	<Null>	0	0	0	0	0	<Null>	0	0	0	<Null>	<Null>	<Null>	0	<Null>	0	<Null>	0	<Null>	<Null>	<Null>	<Null>	<Null>	<Null>	<Null>	<Null>	<Null>	<Null>	<Null>	<Null>	Geological Survey of Canada - Pacific
339	303	Point	<Null>	<Null>	Canada West Coast	Canada West Coast_242	<Null>	<Null>	<Null>	0	<Null>	49.0043	-124.882	0	0	0	0	0	<Null>	0	0	0	0	0	<Null>	0	0	0	<Null>	<Null>	<Null>	0	<Null>	0	<Null>	0	<Null>	<Null>	<Null>	<Null>	<Null>	<Null>	<Null>	<Null>	<Null>	<Null>	<Null>	<Null>	Geological Survey of Canada - Pacific
340	304	Point	<Null>	<Null>	Canada West Coast	Canada West Coast_243	<Null>	<Null>	<Null>	0	<Null>	49.008	-124.864	0	0	0	0	0	<Null>	0	0	0	0	0	<Null>	0	0	0	<Null>	<Null>	<Null>	0	<Null>	0	<Null>	0	<Null>	<Null>	<Null>	<Null>	<Null>	<Null>	<Null>	<Null>	<Null>	<Null>	<Null>	<Null>	Geological Survey of Canada - Pacific
341	305	Point	<Null>	<Null>	Canada West Coast	Canada West Coast_244	<Null>	<Null>	<Null>	0	<Null>	49.0187	-124.867	0	0	0	0	0	<Null>	0	0	0	0	0	<Null>	0	0	0	<Null>	<Null>	<Null>	0	<Null>	0	<Null>	0	<Null>	<Null>	<Null>	<Null>	<Null>	<Null>	<Null>	<Null>	<Null>	<Null>	<Null>	<Null>	Geological Survey of Canada - Pacific
342	306	Point	<Null>	<Null>	Canada West Coast	Canada West Coast_245	<Null>	<Null>	<Null>	0	<Null>	49.0809	-125.168	0	0	0	0	0	<Null>	0	0	0	0	0	<Null>	0	0	0	<Null>	<Null>	<Null>	0	<Null>	0	<Null>	0	<Null>	<Null>	<Null>	<Null>	<Null>	<Null>	<Null>	<Null>	<Null>	<Null>	<Null>	<Null>	Geological Survey of Canada - Pacific
343	307	Point	<Null>	<Null>	Canada West Coast	Canada West Coast_246	<Null>	<Null>	<Null>	0	<Null>	50.0022	-123.982	0	0	0	0	0	<Null>	0	0	0	0	0	<Null>	0	0	0	<Null>	<Null>	<Null>	0	<Null>	0	<Null>	0	<Null>	<Null>	<Null>	<Null>	<Null>	<Null>	<Null>	<Null>	<Null>	<Null>	<Null>	<Null>	Geological Survey of Canada - Pacific
344	308	Point	<Null>	<Null>	Canada West Coast	Canada West Coast_247	<Null>	<Null>	<Null>	0	<Null>	50.0101	-123.971	0	0	0	0	0	<Null>	0	0	0	0	0	<Null>	0	0	0	<Null>	<Null>	<Null>	0	<Null>	0	<Null>	0	<Null>	<Null>	<Null>	<Null>	<Null>	<Null>	<Null>	<Null>	<Null>	<Null>	<Null>	<Null>	Geological Survey of Canada - Pacific
345	309	Point	<Null>	<Null>	Canada West Coast	Canada West Coast_248	<Null>	<Null>	<Null>	0	<Null>	50.0141	-123.957	0	0	0	0	0	<Null>	0	0	0	0	0	<Null>	0	0	0	<Null>	<Null>	<Null>	0	<Null>	0	<Null>	0	<Null>	<Null>	<Null>	<Null>	<Null>	<Null>	<Null>	<Null>	<Null>	<Null>	<Null>	<Null>	Geological Survey of Canada - Pacific
346	310	Point	<Null>	<Null>	Canada West Coast	Canada West Coast_249	<Null>	<Null>	<Null>	0	<Null>	50.0213	-123.92	0	0	0	0	0	<Null>	0	0	0	0	0	<Null>	0	0	0	<Null>	<Null>	<Null>	0	<Null>	0	<Null>	0	<Null>	<Null>	<Null>	<Null>	<Null>	<Null>	<Null>	<Null>	<Null>	<Null>	<Null>	<Null>	Geological Survey of Canada - Pacific
347	311	Point	<Null>	<Null>	Canada West Coast	Canada West Coast_250	<Null>	<Null>	<Null>	0	<Null>	50.0313	-123.894	0	0	0	0	0	<Null>	0	0	0	0	0	<Null>	0	0	0	<Null>	<Null>	<Null>	0	<Null>	0	<Null>	0	<Null>	<Null>	<Null>	<Null>	<Null>	<Null>	<Null>	<Null>	<Null>	<Null>	<Null>	<Null>	Geological Survey of Canada - Pacific
348	312	Point	<Null>	<Null>	Canada West Coast	Canada West Coast_251	<Null>	<Null>	<Null>	0	<Null>	50.0098	-123.908	0	0	0	0	0	<Null>	0	0	0	0	0	<Null>	0	0	0	<Null>	<Null>	<Null>	0	<Null>	0	<Null>	0	<Null>	<Null>	<Null>	<Null>	<Null>	<Null>	<Null>	<Null>	<Null>	<Null>	<Null>	<Null>	Geological Survey of Canada - Pacific
349	313	Point	<Null>	<Null>	Canada West Coast	Canada West Coast_252	<Null>	<Null>	<Null>	0	<Null>	50.0445	-123.813	0	0	0	0	0	<Null>	0	0	0	0	0	<Null>	0	0	0	<Null>	<Null>	<Null>	0	<Null>	0	<Null>	0	<Null>	<Null>	<Null>	<Null>	<Null>	<Null>	<Null>	<Null>	<Null>	<Null>	<Null>	<Null>	Geological Survey of Canada - Pacific
350	314	Point	<Null>	<Null>	Canada West Coast	Canada West Coast_253	<Null>	<Null>	<Null>	0	<Null>	50.0816	-123.779	0	0	0	0	0	<Null>	0	0	0	0	0	<Null>	0	0	0	<Null>	<Null>	<Null>	0	<Null>	0	<Null>	0	<Null>	<Null>	<Null>	<Null>	<Null>	<Null>	<Null>	<Null>	<Null>	<Null>	<Null>	<Null>	Geological Survey of Canada - Pacific
351	315	Point	<Null>	<Null>	Canada West Coast	Canada West Coast_254	<Null>	<Null>	<Null>	0	<Null>	50.078	-123.81	0	0	0	0	0	<Null>	0	0	0	0	0	<Null>	0	0	0	<Null>	<Null>	<Null>	0	<Null>	0	<Null>	0	<Null>	<Null>	<Null>	<Null>	<Null>	<Null>	<Null>	<Null>	<Null>	<Null>	<Null>	<Null>	Geological Survey of Canada - Pacific
352	316	Point	<Null>	<Null>	Canada West Coast	Canada West Coast_255	<Null>	<Null>	<Null>	0	<Null>	50.2061	-123.978	0	0	0	0	0	<Null>	0	0	0	0	0	<Null>	0	0	0	<Null>	<Null>	<Null>	0	<Null>	0	<Null>	0	<Null>	<Null>	<Null>	<Null>	<Null>	<Null>	<Null>	<Null>	<Null>	<Null>	<Null>	<Null>	Geological Survey of Canada - Pacific
353	317	Point	<Null>	<Null>	Canada West Coast	Canada West Coast_256	<Null>	<Null>	<Null>	0	<Null>	50.1823	-123.954	0	0	0	0	0	<Null>	0	0	0	0	0	<Null>	0	0	0	<Null>	<Null>	<Null>	0	<Null>	0	<Null>	0	<Null>	<Null>	<Null>	<Null>	<Null>	<Null>	<Null>	<Null>	<Null>	<Null>	<Null>	<Null>	Geological Survey of Canada - Pacific
354	318	Point	<Null>	<Null>	Canada West Coast	Canada West Coast_257	<Null>	<Null>	<Null>	0	<Null>	49.8946	-123.89	0	0	0	0	0	<Null>	0	0	0	0	0	<Null>	0	0	0	<Null>	<Null>	<Null>	0	<Null>	0	<Null>	0	<Null>	<Null>	<Null>	<Null>	<Null>	<Null>	<Null>	<Null>	<Null>	<Null>	<Null>	<Null>	Geological Survey of Canada - Pacific
355	319	Point	<Null>	<Null>	Canada West Coast	Canada West Coast_258	<Null>	<Null>	<Null>	0	<Null>	49.0265	-124.861	0	0	0	0	0	<Null>	0	0	0	0	0	<Null>	0	0	0	<Null>	<Null>	<Null>	0	<Null>	0	<Null>	0	<Null>	<Null>	<Null>	<Null>	<Null>	<Null>	<Null>	<Null>	<Null>	<Null>	<Null>	<Null>	Geological Survey of Canada - Pacific
356	320	Point	<Null>	<Null>	Canada West Coast	Canada West Coast_259	<Null>	<Null>	<Null>	0	<Null>	49.0294	-124.862	0	0	0	0	0	<Null>	0	0	0	0	0	<Null>	0	0	0	<Null>	<Null>	<Null>	0	<Null>	0	<Null>	0	<Null>	<Null>	<Null>	<Null>	<Null>	<Null>	<Null>	<Null>	<Null>	<Null>	<Null>	<Null>	Geological Survey of Canada - Pacific
357	321	Point	<Null>	<Null>	Canada West Coast	Canada West Coast_260	<Null>	<Null>	<Null>	0	<Null>	49.0349	-124.86	0	0	0	0	0	<Null>	0	0	0	0	0	<Null>	0	0	0	<Null>	<Null>	<Null>	0	<Null>	0	<Null>	0	<Null>	<Null>	<Null>	<Null>	<Null>	<Null>	<Null>	<Null>	<Null>	<Null>	<Null>	<Null>	Geological Survey of Canada - Pacific
358	322	Point	<Null>	<Null>	Canada West Coast	Canada West Coast_261	<Null>	<Null>	<Null>	0	<Null>	49.0383	-124.85	0	0	0	0	0	<Null>	0	0	0	0	0	<Null>	0	0	0	<Null>	<Null>	<Null>	0	<Null>	0	<Null>	0	<Null>	<Null>	<Null>	<Null>	<Null>	<Null>	<Null>	<Null>	<Null>	<Null>	<Null>	<Null>	Geological Survey of Canada - Pacific
359	323	Point	<Null>	<Null>	Canada West Coast	Canada West Coast_262	<Null>	<Null>	<Null>	0	<Null>	49.0596	-124.862	0	0	0	0	0	<Null>	0	0	0	0	0	<Null>	0	0	0	<Null>	<Null>	<Null>	0	<Null>	0	<Null>	0	<Null>	<Null>	<Null>	<Null>	<Null>	<Null>	<Null>	<Null>	<Null>	<Null>	<Null>	<Null>	Geological Survey of Canada - Pacific
360	324	Point	<Null>	<Null>	Canada West Coast	Canada West Coast_263	<Null>	<Null>	<Null>	0	<Null>	49.0785	-124.843	0	0	0	0	0	<Null>	0	0	0	0	0	<Null>	0	0	0	<Null>	<Null>	<Null>	0	<Null>	0	<Null>	0	<Null>	<Null>	<Null>	<Null>	<Null>	<Null>	<Null>	<Null>	<Null>	<Null>	<Null>	<Null>	Geological Survey of Canada - Pacific
361	325	Point	<Null>	<Null>	Canada West Coast	Canada West Coast_264	<Null>	<Null>	<Null>	0	<Null>	49.1051	-124.824	0	0	0	0	0	<Null>	0	0	0	0	0	<Null>	0	0	0	<Null>	<Null>	<Null>	0	<Null>	0	<Null>	0	<Null>	<Null>	<Null>	<Null>	<Null>	<Null>	<Null>	<Null>	<Null>	<Null>	<Null>	<Null>	Geological Survey of Canada - Pacific
362	326	Point	<Null>	<Null>	Canada West Coast	Canada West Coast_265	<Null>	<Null>	<Null>	0	<Null>	49.1328	-124.812	0	0	0	0	0	<Null>	0	0	0	0	0	<Null>	0	0	0	<Null>	<Null>	<Null>	0	<Null>	0	<Null>	0	<Null>	<Null>	<Null>	<Null>	<Null>	<Null>	<Null>	<Null>	<Null>	<Null>	<Null>	<Null>	Geological Survey of Canada - Pacific
363	327	Point	<Null>	<Null>	Canada West Coast	Canada West Coast_266	<Null>	<Null>	<Null>	0	<Null>	49.1409	-124.81	0	0	0	0	0	<Null>	0	0	0	0	0	<Null>	0	0	0	<Null>	<Null>	<Null>	0	<Null>	0	<Null>	0	<Null>	<Null>	<Null>	<Null>	<Null>	<Null>	<Null>	<Null>	<Null>	<Null>	<Null>	<Null>	Geological Survey of Canada - Pacific
364	328	Point	<Null>	<Null>	Canada West Coast	Canada West Coast_267	<Null>	<Null>	<Null>	0	<Null>	49.1394	-124.796	0	0	0	0	0	<Null>	0	0	0	0	0	<Null>	0	0	0	<Null>	<Null>	<Null>	0	<Null>	0	<Null>	0	<Null>	<Null>	<Null>	<Null>	<Null>	<Null>	<Null>	<Null>	<Null>	<Null>	<Null>	<Null>	Geological Survey of Canada - Pacific
365	329	Point	<Null>	<Null>	Canada West Coast	Canada West Coast_268	<Null>	<Null>	<Null>	0	<Null>	49.1522	-124.798	0	0	0	0	0	<Null>	0	0	0	0	0	<Null>	0	0	0	<Null>	<Null>	<Null>	0	<Null>	0	<Null>	0	<Null>	<Null>	<Null>	<Null>	<Null>	<Null>	<Null>	<Null>	<Null>	<Null>	<Null>	<Null>	Geological Survey of Canada - Pacific
366	330	Point	<Null>	<Null>	Canada West Coast	Canada West Coast_269	<Null>	<Null>	<Null>	0	<Null>	49.1821	-124.821	0	0	0	0	0	<Null>	0	0	0	0	0	<Null>	0	0	0	<Null>	<Null>	<Null>	0	<Null>	0	<Null>	0	<Null>	<Null>	<Null>	<Null>	<Null>	<Null>	<Null>	<Null>	<Null>	<Null>	<Null>	<Null>	Geological Survey of Canada - Pacific
367	331	Point	<Null>	<Null>	Canada West Coast	Canada West Coast_270	<Null>	<Null>	<Null>	0	<Null>	49.2162	-124.819	0	0	0	0	0	<Null>	0	0	0	0	0	<Null>	0	0	0	<Null>	<Null>	<Null>	0	<Null>	0	<Null>	0	<Null>	<Null>	<Null>	<Null>	<Null>	<Null>	<Null>	<Null>	<Null>	<Null>	<Null>	<Null>	Geological Survey of Canada - Pacific
368	332	Point	<Null>	<Null>	Canada West Coast	Canada West Coast_271	<Null>	<Null>	<Null>	0	<Null>	48.5279	-124.541	0	0	0	0	0	<Null>	0	0	0	0	0	<Null>	0	0	0	<Null>	<Null>	<Null>	0	<Null>	0	<Null>	0	<Null>	<Null>	<Null>	<Null>	<Null>	<Null>	<Null>	<Null>	<Null>	<Null>	<Null>	<Null>	Geological Survey of Canada - Pacific
369	333	Point	<Null>	<Null>	Canada West Coast	Canada West Coast_272	<Null>	<Null>	<Null>	0	<Null>	48.5291	-124.534	0	0	0	0	0	<Null>	0	0	0	0	0	<Null>	0	0	0	<Null>	<Null>	<Null>	0	<Null>	0	<Null>	0	<Null>	<Null>	<Null>	<Null>	<Null>	<Null>	<Null>	<Null>	<Null>	<Null>	<Null>	<Null>	Geological Survey of Canada - Pacific
370	334	Point	<Null>	<Null>	Canada West Coast	Canada West Coast_273	<Null>	<Null>	<Null>	0	<Null>	48.5291	-124.549	0	0	0	0	0	<Null>	0	0	0	0	0	<Null>	0	0	0	<Null>	<Null>	<Null>	0	<Null>	0	<Null>	0	<Null>	<Null>	<Null>	<Null>	<Null>	<Null>	<Null>	<Null>	<Null>	<Null>	<Null>	<Null>	Geological Survey of Canada - Pacific
371	335	Point	<Null>	<Null>	Canada West Coast	Canada West Coast_274	<Null>	<Null>	<Null>	0	<Null>	48.468	-124.336	0	0	0	0	0	<Null>	0	0	0	0	0	<Null>	0	0	0	<Null>	<Null>	<Null>	0	<Null>	0	<Null>	0	<Null>	<Null>	<Null>	<Null>	<Null>	<Null>	<Null>	<Null>	<Null>	<Null>	<Null>	<Null>	Geological Survey of Canada - Pacific
372	336	Point	<Null>	<Null>	Canada West Coast	Canada West Coast_275	<Null>	<Null>	<Null>	0	<Null>	48.467	-124.333	0	0	0	0	0	<Null>	0	0	0	0	0	<Null>	0	0	0	<Null>	<Null>	<Null>	0	<Null>	0	<Null>	0	<Null>	<Null>	<Null>	<Null>	<Null>	<Null>	<Null>	<Null>	<Null>	<Null>	<Null>	<Null>	Geological Survey of Canada - Pacific
373	337	Point	<Null>	<Null>	Canada West Coast	Canada West Coast_276	<Null>	<Null>	<Null>	0	<Null>	48.4642	-124.317	0	0	0	0	0	<Null>	0	0	0	0	0	<Null>	0	0	0	<Null>	<Null>	<Null>	0	<Null>	0	<Null>	0	<Null>	<Null>	<Null>	<Null>	<Null>	<Null>	<Null>	<Null>	<Null>	<Null>	<Null>	<Null>	Geological Survey of Canada - Pacific
374	338	Point	<Null>	<Null>	Canada West Coast	Canada West Coast_277	<Null>	<Null>	<Null>	0	<Null>	48.4712	-124.341	0	0	0	0	0	<Null>	0	0	0	0	0	<Null>	0	0	0	<Null>	<Null>	<Null>	0	<Null>	0	<Null>	0	<Null>	<Null>	<Null>	<Null>	<Null>	<Null>	<Null>	<Null>	<Null>	<Null>	<Null>	<Null>	Geological Survey of Canada - Pacific
375	339	Point	<Null>	<Null>	Canada West Coast	Canada West Coast_278	<Null>	<Null>	<Null>	0	<Null>	48.444	-124.286	0	0	0	0	0	<Null>	0	0	0	0	0	<Null>	0	0	0	<Null>	<Null>	<Null>	0	<Null>	0	<Null>	0	<Null>	<Null>	<Null>	<Null>	<Null>	<Null>	<Null>	<Null>	<Null>	<Null>	<Null>	<Null>	Geological Survey of Canada - Pacific
376	340	Point	<Null>	<Null>	Canada West Coast	Canada West Coast_279	<Null>	<Null>	<Null>	0	<Null>	48.4385	-124.262	0	0	0	0	0	<Null>	0	0	0	0	0	<Null>	0	0	0	<Null>	<Null>	<Null>	0	<Null>	0	<Null>	0	<Null>	<Null>	<Null>	<Null>	<Null>	<Null>	<Null>	<Null>	<Null>	<Null>	<Null>	<Null>	Geological Survey of Canada - Pacific
382	341	Point	<Null>	<Null>	Canada West Coast	Canada West Coast_280	<Null>	<Null>	<Null>	0	<Null>	48.433	-124.204	0	0	0	0	0	<Null>	0	0	0	0	0	<Null>	0	0	0	<Null>	<Null>	<Null>	0	<Null>	0	<Null>	0	<Null>	<Null>	<Null>	<Null>	<Null>	<Null>	<Null>	<Null>	<Null>	<Null>	<Null>	<Null>	Geological Survey of Canada - Pacific
383	342	Point	<Null>	<Null>	Canada West Coast	Canada West Coast_281	<Null>	<Null>	<Null>	0	<Null>	48.3901	-124.069	0	0	0	0	0	<Null>	0	0	0	0	0	<Null>	0	0	0	<Null>	<Null>	<Null>	0	<Null>	0	<Null>	0	<Null>	<Null>	<Null>	<Null>	<Null>	<Null>	<Null>	<Null>	<Null>	<Null>	<Null>	<Null>	Geological Survey of Canada - Pacific
384	343	Point	<Null>	<Null>	Canada West Coast	Canada West Coast_282	<Null>	<Null>	<Null>	0	<Null>	48.3868	-124.058	0	0	0	0	0	<Null>	0	0	0	0	0	<Null>	0	0	0	<Null>	<Null>	<Null>	0	<Null>	0	<Null>	0	<Null>	<Null>	<Null>	<Null>	<Null>	<Null>	<Null>	<Null>	<Null>	<Null>	<Null>	<Null>	Geological Survey of Canada - Pacific
385	344	Point	<Null>	<Null>	Canada West Coast	Canada West Coast_283	<Null>	<Null>	<Null>	0	<Null>	48.3818	-124	0	0	0	0	0	<Null>	0	0	0	0	0	<Null>	0	0	0	<Null>	<Null>	<Null>	0	<Null>	0	<Null>	0	<Null>	<Null>	<Null>	<Null>	<Null>	<Null>	<Null>	<Null>	<Null>	<Null>	<Null>	<Null>	Geological Survey of Canada - Pacific
386	345	Point	<Null>	<Null>	Canada West Coast	Canada West Coast_284	<Null>	<Null>	<Null>	0	<Null>	48.3841	-124.027	0	0	0	0	0	<Null>	0	0	0	0	0	<Null>	0	0	0	<Null>	<Null>	<Null>	0	<Null>	0	<Null>	0	<Null>	<Null>	<Null>	<Null>	<Null>	<Null>	<Null>	<Null>	<Null>	<Null>	<Null>	<Null>	Geological Survey of Canada - Pacific
387	346	Point	<Null>	<Null>	Canada West Coast	Canada West Coast_285	<Null>	<Null>	<Null>	0	<Null>	48.3709	-123.924	0	0	0	0	0	<Null>	0	0	0	0	0	<Null>	0	0	0	<Null>	<Null>	<Null>	0	<Null>	0	<Null>	0	<Null>	<Null>	<Null>	<Null>	<Null>	<Null>	<Null>	<Null>	<Null>	<Null>	<Null>	<Null>	Geological Survey of Canada - Pacific
173	347	Point	<Null>	<Null>	Canada West Coast	Canada West Coast_286	<Null>	<Null>	<Null>	0	<Null>	48.3666	-123.909	0	0	0	0	0	<Null>	0	0	0	0	0	<Null>	0	0	0	<Null>	<Null>	<Null>	0	<Null>	0	<Null>	0	<Null>	<Null>	<Null>	<Null>	<Null>	<Null>	<Null>	<Null>	<Null>	<Null>	<Null>	<Null>	Geological Survey of Canada - Pacific
174	348	Point	<Null>	<Null>	Canada West Coast	Canada West Coast_287	<Null>	<Null>	<Null>	0	<Null>	48.3601	-123.87	0	0	0	0	0	<Null>	0	0	0	0	0	<Null>	0	0	0	<Null>	<Null>	<Null>	0	<Null>	0	<Null>	0	<Null>	<Null>	<Null>	<Null>	<Null>	<Null>	<Null>	<Null>	<Null>	<Null>	<Null>	<Null>	Geological Survey of Canada - Pacific
175	349	Point	<Null>	<Null>	Canada West Coast	Canada West Coast_288	<Null>	<Null>	<Null>	0	<Null>	48.3264	-123.731	0	0	0	0	0	<Null>	0	0	0	0	0	<Null>	0	0	0	<Null>	<Null>	<Null>	0	<Null>	0	<Null>	0	<Null>	<Null>	<Null>	<Null>	<Null>	<Null>	<Null>	<Null>	<Null>	<Null>	<Null>	<Null>	Geological Survey of Canada - Pacific
176	350	Point	<Null>	<Null>	Canada West Coast	Canada West Coast_289	<Null>	<Null>	<Null>	0	<Null>	48.334	-123.754	0	0	0	0	0	<Null>	0	0	0	0	0	<Null>	0	0	0	<Null>	<Null>	<Null>	0	<Null>	0	<Null>	0	<Null>	<Null>	<Null>	<Null>	<Null>	<Null>	<Null>	<Null>	<Null>	<Null>	<Null>	<Null>	Geological Survey of Canada - Pacific
177	351	Point	<Null>	<Null>	Canada West Coast	Canada West Coast_290	<Null>	<Null>	<Null>	0	<Null>	48.5298	-123.546	0	0	0	0	0	<Null>	0	0	0	0	0	<Null>	0	0	0	<Null>	<Null>	<Null>	0	<Null>	0	<Null>	0	<Null>	<Null>	<Null>	<Null>	<Null>	<Null>	<Null>	<Null>	<Null>	<Null>	<Null>	<Null>	Geological Survey of Canada - Pacific
178	352	Point	<Null>	<Null>	Canada West Coast	Canada West Coast_291	<Null>	<Null>	<Null>	0	<Null>	48.5441	-123.554	0	0	0	0	0	<Null>	0	0	0	0	0	<Null>	0	0	0	<Null>	<Null>	<Null>	0	<Null>	0	<Null>	0	<Null>	<Null>	<Null>	<Null>	<Null>	<Null>	<Null>	<Null>	<Null>	<Null>	<Null>	<Null>	Geological Survey of Canada - Pacific
179	353	Point	<Null>	<Null>	Canada West Coast	Canada West Coast_292	<Null>	<Null>	<Null>	0	<Null>	48.5731	-123.511	0	0	0	0	0	<Null>	0	0	0	0	0	<Null>	0	0	0	<Null>	<Null>	<Null>	0	<Null>	0	<Null>	0	<Null>	<Null>	<Null>	<Null>	<Null>	<Null>	<Null>	<Null>	<Null>	<Null>	<Null>	<Null>	Geological Survey of Canada - Pacific
180	354	Point	<Null>	<Null>	Canada West Coast	Canada West Coast_293	<Null>	<Null>	<Null>	0	<Null>	48.578	-123.514	0	0	0	0	0	<Null>	0	0	0	0	0	<Null>	0	0	0	<Null>	<Null>	<Null>	0	<Null>	0	<Null>	0	<Null>	<Null>	<Null>	<Null>	<Null>	<Null>	<Null>	<Null>	<Null>	<Null>	<Null>	<Null>	Geological Survey of Canada - Pacific
181	355	Point	<Null>	<Null>	Canada West Coast	Canada West Coast_294	<Null>	<Null>	<Null>	0	<Null>	48.5841	-123.518	0	0	0	0	0	<Null>	0	0	0	0	0	<Null>	0	0	0	<Null>	<Null>	<Null>	0	<Null>	0	<Null>	0	<Null>	<Null>	<Null>	<Null>	<Null>	<Null>	<Null>	<Null>	<Null>	<Null>	<Null>	<Null>	Geological Survey of Canada - Pacific
182	356	Point	<Null>	<Null>	Canada West Coast	Canada West Coast_295	<Null>	<Null>	<Null>	0	<Null>	48.5887	-123.518	0	0	0	0	0	<Null>	0	0	0	0	0	<Null>	0	0	0	<Null>	<Null>	<Null>	0	<Null>	0	<Null>	0	<Null>	<Null>	<Null>	<Null>	<Null>	<Null>	<Null>	<Null>	<Null>	<Null>	<Null>	<Null>	Geological Survey of Canada - Pacific
183	357	Point	<Null>	<Null>	Canada West Coast	Canada West Coast_296	<Null>	<Null>	<Null>	0	<Null>	48.5947	-123.517	0	0	0	0	0	<Null>	0	0	0	0	0	<Null>	0	0	0	<Null>	<Null>	<Null>	0	<Null>	0	<Null>	0	<Null>	<Null>	<Null>	<Null>	<Null>	<Null>	<Null>	<Null>	<Null>	<Null>	<Null>	<Null>	Geological Survey of Canada - Pacific
184	358	Point	<Null>	<Null>	Canada West Coast	Canada West Coast_297	<Null>	<Null>	<Null>	0	<Null>	48.6009	-123.513	0	0	0	0	0	<Null>	0	0	0	0	0	<Null>	0	0	0	<Null>	<Null>	<Null>	0	<Null>	0	<Null>	0	<Null>	<Null>	<Null>	<Null>	<Null>	<Null>	<Null>	<Null>	<Null>	<Null>	<Null>	<Null>	Geological Survey of Canada - Pacific
185	359	Point	<Null>	<Null>	Canada West Coast	Canada West Coast_298	<Null>	<Null>	<Null>	0	<Null>	48.6109	-123.511	0	0	0	0	0	<Null>	0	0	0	0	0	<Null>	0	0	0	<Null>	<Null>	<Null>	0	<Null>	0	<Null>	0	<Null>	<Null>	<Null>	<Null>	<Null>	<Null>	<Null>	<Null>	<Null>	<Null>	<Null>	<Null>	Geological Survey of Canada - Pacific
186	360	Point	<Null>	<Null>	Canada West Coast	Canada West Coast_299	<Null>	<Null>	<Null>	0	<Null>	48.6217	-123.512	0	0	0	0	0	<Null>	0	0	0	0	0	<Null>	0	0	0	<Null>	<Null>	<Null>	0	<Null>	0	<Null>	0	<Null>	<Null>	<Null>	<Null>	<Null>	<Null>	<Null>	<Null>	<Null>	<Null>	<Null>	<Null>	Geological Survey of Canada - Pacific
187	361	Point	<Null>	<Null>	Canada West Coast	Canada West Coast_300	<Null>	<Null>	<Null>	0	<Null>	48.6183	-123.51	0	0	0	0	0	<Null>	0	0	0	0	0	<Null>	0	0	0	<Null>	<Null>	<Null>	0	<Null>	0	<Null>	0	<Null>	<Null>	<Null>	<Null>	<Null>	<Null>	<Null>	<Null>	<Null>	<Null>	<Null>	<Null>	Geological Survey of Canada - Pacific
188	362	Point	<Null>	<Null>	Canada West Coast	Canada West Coast_301	<Null>	<Null>	<Null>	0	<Null>	48.6256	-123.514	0	0	0	0	0	<Null>	0	0	0	0	0	<Null>	0	0	0	<Null>	<Null>	<Null>	0	<Null>	0	<Null>	0	<Null>	<Null>	<Null>	<Null>	<Null>	<Null>	<Null>	<Null>	<Null>	<Null>	<Null>	<Null>	Geological Survey of Canada - Pacific
189	363	Point	<Null>	<Null>	Canada West Coast	Canada West Coast_302	<Null>	<Null>	<Null>	0	<Null>	48.6347	-123.518	0	0	0	0	0	<Null>	0	0	0	0	0	<Null>	0	0	0	<Null>	<Null>	<Null>	0	<Null>	0	<Null>	0	<Null>	<Null>	<Null>	<Null>	<Null>	<Null>	<Null>	<Null>	<Null>	<Null>	<Null>	<Null>	Geological Survey of Canada - Pacific
190	364	Point	<Null>	<Null>	Canada West Coast	Canada West Coast_303	<Null>	<Null>	<Null>	0	<Null>	48.6441	-123.522	0	0	0	0	0	<Null>	0	0	0	0	0	<Null>	0	0	0	<Null>	<Null>	<Null>	0	<Null>	0	<Null>	0	<Null>	<Null>	<Null>	<Null>	<Null>	<Null>	<Null>	<Null>	<Null>	<Null>	<Null>	<Null>	Geological Survey of Canada - Pacific
191	365	Point	<Null>	<Null>	Canada West Coast	Canada West Coast_304	<Null>	<Null>	<Null>	0	<Null>	48.6695	-123.5	0	0	0	0	0	<Null>	0	0	0	0	0	<Null>	0	0	0	<Null>	<Null>	<Null>	0	<Null>	0	<Null>	0	<Null>	<Null>	<Null>	<Null>	<Null>	<Null>	<Null>	<Null>	<Null>	<Null>	<Null>	<Null>	Geological Survey of Canada - Pacific
192	366	Point	<Null>	<Null>	Canada West Coast	Canada West Coast_305	<Null>	<Null>	<Null>	0	<Null>	48.6637	-123.497	0	0	0	0	0	<Null>	0	0	0	0	0	<Null>	0	0	0	<Null>	<Null>	<Null>	0	<Null>	0	<Null>	0	<Null>	<Null>	<Null>	<Null>	<Null>	<Null>	<Null>	<Null>	<Null>	<Null>	<Null>	<Null>	Geological Survey of Canada - Pacific
193	367	Point	<Null>	<Null>	Canada West Coast	Canada West Coast_306	<Null>	<Null>	<Null>	0	<Null>	48.6585	-123.497	0	0	0	0	0	<Null>	0	0	0	0	0	<Null>	0	0	0	<Null>	<Null>	<Null>	0	<Null>	0	<Null>	0	<Null>	<Null>	<Null>	<Null>	<Null>	<Null>	<Null>	<Null>	<Null>	<Null>	<Null>	<Null>	Geological Survey of Canada - Pacific
388	368	Point	<Null>	<Null>	Canada West Coast	Canada West Coast_307	<Null>	<Null>	<Null>	0	<Null>	48.5674	-123.5	0	0	0	0	0	<Null>	0	0	0	0	0	<Null>	0	0	0	<Null>	<Null>	<Null>	0	<Null>	0	<Null>	0	<Null>	<Null>	<Null>	<Null>	<Null>	<Null>	<Null>	<Null>	<Null>	<Null>	<Null>	<Null>	Geological Survey of Canada - Pacific
389	369	Point	<Null>	<Null>	Canada West Coast	Canada West Coast_308	<Null>	<Null>	<Null>	0	<Null>	48.5692	-123.499	0	0	0	0	0	<Null>	0	0	0	0	0	<Null>	0	0	0	<Null>	<Null>	<Null>	0	<Null>	0	<Null>	0	<Null>	<Null>	<Null>	<Null>	<Null>	<Null>	<Null>	<Null>	<Null>	<Null>	<Null>	<Null>	Geological Survey of Canada - Pacific
390	370	Point	<Null>	<Null>	Canada West Coast	Canada West Coast_309	<Null>	<Null>	<Null>	0	<Null>	48.5561	-123.51	0	0	0	0	0	<Null>	0	0	0	0	0	<Null>	0	0	0	<Null>	<Null>	<Null>	0	<Null>	0	<Null>	0	<Null>	<Null>	<Null>	<Null>	<Null>	<Null>	<Null>	<Null>	<Null>	<Null>	<Null>	<Null>	Geological Survey of Canada - Pacific
391	371	Point	<Null>	<Null>	Canada West Coast	Canada West Coast_310	<Null>	<Null>	<Null>	0	<Null>	48.6045	-123.49	0	0	0	0	0	<Null>	0	0	0	0	0	<Null>	0	0	0	<Null>	<Null>	<Null>	0	<Null>	0	<Null>	0	<Null>	<Null>	<Null>	<Null>	<Null>	<Null>	<Null>	<Null>	<Null>	<Null>	<Null>	<Null>	Geological Survey of Canada - Pacific
392	372	Point	<Null>	<Null>	Canada West Coast	Canada West Coast_311	<Null>	<Null>	<Null>	0	<Null>	48.6172	-123.49	0	0	0	0	0	<Null>	0	0	0	0	0	<Null>	0	0	0	<Null>	<Null>	<Null>	0	<Null>	0	<Null>	0	<Null>	<Null>	<Null>	<Null>	<Null>	<Null>	<Null>	<Null>	<Null>	<Null>	<Null>	<Null>	Geological Survey of Canada - Pacific
393	373	Point	<Null>	<Null>	Canada West Coast	Canada West Coast_312	<Null>	<Null>	<Null>	0	<Null>	48.6134	-123.491	0	0	0	0	0	<Null>	0	0	0	0	0	<Null>	0	0	0	<Null>	<Null>	<Null>	0	<Null>	0	<Null>	0	<Null>	<Null>	<Null>	<Null>	<Null>	<Null>	<Null>	<Null>	<Null>	<Null>	<Null>	<Null>	Geological Survey of Canada - Pacific
394	374	Point	<Null>	<Null>	Canada West Coast	Canada West Coast_313	<Null>	<Null>	<Null>	0	<Null>	48.6226	-123.492	0	0	0	0	0	<Null>	0	0	0	0	0	<Null>	0	0	0	<Null>	<Null>	<Null>	0	<Null>	0	<Null>	0	<Null>	<Null>	<Null>	<Null>	<Null>	<Null>	<Null>	<Null>	<Null>	<Null>	<Null>	<Null>	Geological Survey of Canada - Pacific
395	375	Point	<Null>	<Null>	Canada West Coast	Canada West Coast_314	<Null>	<Null>	<Null>	0	<Null>	48.6213	-123.491	0	0	0	0	0	<Null>	0	0	0	0	0	<Null>	0	0	0	<Null>	<Null>	<Null>	0	<Null>	0	<Null>	0	<Null>	<Null>	<Null>	<Null>	<Null>	<Null>	<Null>	<Null>	<Null>	<Null>	<Null>	<Null>	Geological Survey of Canada - Pacific
396	376	Point	<Null>	<Null>	Canada West Coast	Canada West Coast_315	<Null>	<Null>	<Null>	0	<Null>	48.5943	-123.495	0	0	0	0	0	<Null>	0	0	0	0	0	<Null>	0	0	0	<Null>	<Null>	<Null>	0	<Null>	0	<Null>	0	<Null>	<Null>	<Null>	<Null>	<Null>	<Null>	<Null>	<Null>	<Null>	<Null>	<Null>	<Null>	Geological Survey of Canada - Pacific
397	377	Point	<Null>	<Null>	Canada West Coast	Canada West Coast_316	<Null>	<Null>	<Null>	0	<Null>	48.5961	-123.494	0	0	0	0	0	<Null>	0	0	0	0	0	<Null>	0	0	0	<Null>	<Null>	<Null>	0	<Null>	0	<Null>	0	<Null>	<Null>	<Null>	<Null>	<Null>	<Null>	<Null>	<Null>	<Null>	<Null>	<Null>	<Null>	Geological Survey of Canada - Pacific
398	378	Point	<Null>	<Null>	Canada West Coast	Canada West Coast_317	<Null>	<Null>	<Null>	0	<Null>	48.5914	-123.495	0	0	0	0	0	<Null>	0	0	0	0	0	<Null>	0	0	0	<Null>	<Null>	<Null>	0	<Null>	0	<Null>	0	<Null>	<Null>	<Null>	<Null>	<Null>	<Null>	<Null>	<Null>	<Null>	<Null>	<Null>	<Null>	Geological Survey of Canada - Pacific
399	379	Point	<Null>	<Null>	Canada West Coast	Canada West Coast_318	<Null>	<Null>	<Null>	0	<Null>	48.5899	-123.494	0	0	0	0	0	<Null>	0	0	0	0	0	<Null>	0	0	0	<Null>	<Null>	<Null>	0	<Null>	0	<Null>	0	<Null>	<Null>	<Null>	<Null>	<Null>	<Null>	<Null>	<Null>	<Null>	<Null>	<Null>	<Null>	Geological Survey of Canada - Pacific
400	380	Point	<Null>	<Null>	Canada West Coast	Canada West Coast_319	<Null>	<Null>	<Null>	0	<Null>	48.5881	-123.493	0	0	0	0	0	<Null>	0	0	0	0	0	<Null>	0	0	0	<Null>	<Null>	<Null>	0	<Null>	0	<Null>	0	<Null>	<Null>	<Null>	<Null>	<Null>	<Null>	<Null>	<Null>	<Null>	<Null>	<Null>	<Null>	Geological Survey of Canada - Pacific
401	381	Point	<Null>	<Null>	Canada West Coast	Canada West Coast_320	<Null>	<Null>	<Null>	0	<Null>	48.58	-123.494	0	0	0	0	0	<Null>	0	0	0	0	0	<Null>	0	0	0	<Null>	<Null>	<Null>	0	<Null>	0	<Null>	0	<Null>	<Null>	<Null>	<Null>	<Null>	<Null>	<Null>	<Null>	<Null>	<Null>	<Null>	<Null>	Geological Survey of Canada - Pacific
402	382	Point	<Null>	<Null>	Canada West Coast	Canada West Coast_321	<Null>	<Null>	<Null>	0	<Null>	48.583	-123.492	0	0	0	0	0	<Null>	0	0	0	0	0	<Null>	0	0	0	<Null>	<Null>	<Null>	0	<Null>	0	<Null>	0	<Null>	<Null>	<Null>	<Null>	<Null>	<Null>	<Null>	<Null>	<Null>	<Null>	<Null>	<Null>	Geological Survey of Canada - Pacific
403	383	Point	<Null>	<Null>	Canada West Coast	Canada West Coast_322	<Null>	<Null>	<Null>	0	<Null>	48.5994	-123.493	0	0	0	0	0	<Null>	0	0	0	0	0	<Null>	0	0	0	<Null>	<Null>	<Null>	0	<Null>	0	<Null>	0	<Null>	<Null>	<Null>	<Null>	<Null>	<Null>	<Null>	<Null>	<Null>	<Null>	<Null>	<Null>	Geological Survey of Canada - Pacific
404	384	Point	<Null>	<Null>	Canada West Coast	Canada West Coast_323	<Null>	<Null>	<Null>	0	<Null>	48.6025	-123.492	0	0	0	0	0	<Null>	0	0	0	0	0	<Null>	0	0	0	<Null>	<Null>	<Null>	0	<Null>	0	<Null>	0	<Null>	<Null>	<Null>	<Null>	<Null>	<Null>	<Null>	<Null>	<Null>	<Null>	<Null>	<Null>	Geological Survey of Canada - Pacific
405	385	Point	<Null>	<Null>	Canada West Coast	Canada West Coast_324	<Null>	<Null>	<Null>	0	<Null>	48.6607	-123.521	0	0	0	0	0	<Null>	0	0	0	0	0	<Null>	0	0	0	<Null>	<Null>	<Null>	0	<Null>	0	<Null>	0	<Null>	<Null>	<Null>	<Null>	<Null>	<Null>	<Null>	<Null>	<Null>	<Null>	<Null>	<Null>	Geological Survey of Canada - Pacific
406	386	Point	<Null>	<Null>	Canada West Coast	Canada West Coast_325	<Null>	<Null>	<Null>	0	<Null>	48.6442	-123.532	0	0	0	0	0	<Null>	0	0	0	0	0	<Null>	0	0	0	<Null>	<Null>	<Null>	0	<Null>	0	<Null>	0	<Null>	<Null>	<Null>	<Null>	<Null>	<Null>	<Null>	<Null>	<Null>	<Null>	<Null>	<Null>	Geological Survey of Canada - Pacific
407	387	Point	<Null>	<Null>	Canada West Coast	Canada West Coast_326	<Null>	<Null>	<Null>	0	<Null>	48.6342	-123.526	0	0	0	0	0	<Null>	0	0	0	0	0	<Null>	0	0	0	<Null>	<Null>	<Null>	0	<Null>	0	<Null>	0	<Null>	<Null>	<Null>	<Null>	<Null>	<Null>	<Null>	<Null>	<Null>	<Null>	<Null>	<Null>	Geological Survey of Canada - Pacific
408	388	Point	<Null>	<Null>	Canada West Coast	Canada West Coast_327	<Null>	<Null>	<Null>	0	<Null>	48.6413	-123.532	0	0	0	0	0	<Null>	0	0	0	0	0	<Null>	0	0	0	<Null>	<Null>	<Null>	0	<Null>	0	<Null>	0	<Null>	<Null>	<Null>	<Null>	<Null>	<Null>	<Null>	<Null>	<Null>	<Null>	<Null>	<Null>	Geological Survey of Canada - Pacific
409	389	Point	<Null>	<Null>	Canada West Coast	Canada West Coast_328	<Null>	<Null>	<Null>	0	<Null>	48.6273	-123.522	0	0	0	0	0	<Null>	0	0	0	0	0	<Null>	0	0	0	<Null>	<Null>	<Null>	0	<Null>	0	<Null>	0	<Null>	<Null>	<Null>	<Null>	<Null>	<Null>	<Null>	<Null>	<Null>	<Null>	<Null>	<Null>	Geological Survey of Canada - Pacific
410	390	Point	<Null>	<Null>	Canada West Coast	Canada West Coast_329	<Null>	<Null>	<Null>	0	<Null>	48.6305	-123.524	0	0	0	0	0	<Null>	0	0	0	0	0	<Null>	0	0	0	<Null>	<Null>	<Null>	0	<Null>	0	<Null>	0	<Null>	<Null>	<Null>	<Null>	<Null>	<Null>	<Null>	<Null>	<Null>	<Null>	<Null>	<Null>	Geological Survey of Canada - Pacific
411	391	Point	<Null>	<Null>	Canada West Coast	Canada West Coast_330	<Null>	<Null>	<Null>	0	<Null>	48.5521	-123.552	0	0	0	0	0	<Null>	0	0	0	0	0	<Null>	0	0	0	<Null>	<Null>	<Null>	0	<Null>	0	<Null>	0	<Null>	<Null>	<Null>	<Null>	<Null>	<Null>	<Null>	<Null>	<Null>	<Null>	<Null>	<Null>	Geological Survey of Canada - Pacific
412	392	Point	<Null>	<Null>	Canada West Coast	Canada West Coast_331	<Null>	<Null>	<Null>	0	<Null>	48.5503	-123.554	0	0	0	0	0	<Null>	0	0	0	0	0	<Null>	0	0	0	<Null>	<Null>	<Null>	0	<Null>	0	<Null>	0	<Null>	<Null>	<Null>	<Null>	<Null>	<Null>	<Null>	<Null>	<Null>	<Null>	<Null>	<Null>	Geological Survey of Canada - Pacific
413	393	Point	<Null>	<Null>	Canada West Coast	Canada West Coast_332	<Null>	<Null>	<Null>	0	<Null>	49.0725	-125.155	0	0	0	0	0	<Null>	0	0	0	0	0	<Null>	0	0	0	<Null>	<Null>	<Null>	0	<Null>	0	<Null>	0	<Null>	<Null>	<Null>	<Null>	<Null>	<Null>	<Null>	<Null>	<Null>	<Null>	<Null>	<Null>	Geological Survey of Canada - Pacific
414	394	Point	<Null>	<Null>	Canada West Coast	Canada West Coast_333	<Null>	<Null>	<Null>	0	<Null>	49.0739	-125.16	0	0	0	0	0	<Null>	0	0	0	0	0	<Null>	0	0	0	<Null>	<Null>	<Null>	0	<Null>	0	<Null>	0	<Null>	<Null>	<Null>	<Null>	<Null>	<Null>	<Null>	<Null>	<Null>	<Null>	<Null>	<Null>	Geological Survey of Canada - Pacific
415	395	Point	<Null>	<Null>	Canada West Coast	Canada West Coast_334	<Null>	<Null>	<Null>	0	<Null>	49.0725	-125.163	0	0	0	0	0	<Null>	0	0	0	0	0	<Null>	0	0	0	<Null>	<Null>	<Null>	0	<Null>	0	<Null>	0	<Null>	<Null>	<Null>	<Null>	<Null>	<Null>	<Null>	<Null>	<Null>	<Null>	<Null>	<Null>	Geological Survey of Canada - Pacific
416	396	Point	<Null>	<Null>	Canada West Coast	Canada West Coast_335	<Null>	<Null>	<Null>	0	<Null>	49.0644	-125.15	0	0	0	0	0	<Null>	0	0	0	0	0	<Null>	0	0	0	<Null>	<Null>	<Null>	0	<Null>	0	<Null>	0	<Null>	<Null>	<Null>	<Null>	<Null>	<Null>	<Null>	<Null>	<Null>	<Null>	<Null>	<Null>	Geological Survey of Canada - Pacific
417	397	Point	<Null>	<Null>	Canada West Coast	Canada West Coast_336	<Null>	<Null>	<Null>	0	<Null>	49.0676	-125.151	0	0	0	0	0	<Null>	0	0	0	0	0	<Null>	0	0	0	<Null>	<Null>	<Null>	0	<Null>	0	<Null>	0	<Null>	<Null>	<Null>	<Null>	<Null>	<Null>	<Null>	<Null>	<Null>	<Null>	<Null>	<Null>	Geological Survey of Canada - Pacific
418	398	Point	<Null>	<Null>	Canada West Coast	Canada West Coast_337	<Null>	<Null>	<Null>	0	<Null>	49.0701	-125.152	0	0	0	0	0	<Null>	0	0	0	0	0	<Null>	0	0	0	<Null>	<Null>	<Null>	0	<Null>	0	<Null>	0	<Null>	<Null>	<Null>	<Null>	<Null>	<Null>	<Null>	<Null>	<Null>	<Null>	<Null>	<Null>	Geological Survey of Canada - Pacific
419	399	Point	<Null>	<Null>	Canada West Coast	Canada West Coast_338	<Null>	<Null>	<Null>	0	<Null>	49.0665	-125.155	0	0	0	0	0	<Null>	0	0	0	0	0	<Null>	0	0	0	<Null>	<Null>	<Null>	0	<Null>	0	<Null>	0	<Null>	<Null>	<Null>	<Null>	<Null>	<Null>	<Null>	<Null>	<Null>	<Null>	<Null>	<Null>	Geological Survey of Canada - Pacific
420	400	Point	<Null>	<Null>	Canada West Coast	Canada West Coast_339	<Null>	<Null>	<Null>	0	<Null>	49.053	-125.142	0	0	0	0	0	<Null>	0	0	0	0	0	<Null>	0	0	0	<Null>	<Null>	<Null>	0	<Null>	0	<Null>	0	<Null>	<Null>	<Null>	<Null>	<Null>	<Null>	<Null>	<Null>	<Null>	<Null>	<Null>	<Null>	Geological Survey of Canada - Pacific
421	401	Point	<Null>	<Null>	Canada West Coast	Canada West Coast_340	<Null>	<Null>	<Null>	0	<Null>	49.0584	-125.146	0	0	0	0	0	<Null>	0	0	0	0	0	<Null>	0	0	0	<Null>	<Null>	<Null>	0	<Null>	0	<Null>	0	<Null>	<Null>	<Null>	<Null>	<Null>	<Null>	<Null>	<Null>	<Null>	<Null>	<Null>	<Null>	Geological Survey of Canada - Pacific
422	402	Point	<Null>	<Null>	Canada West Coast	Canada West Coast_341	<Null>	<Null>	<Null>	0	<Null>	49.0909	-125.192	0	0	0	0	0	<Null>	0	0	0	0	0	<Null>	0	0	0	<Null>	<Null>	<Null>	0	<Null>	0	<Null>	0	<Null>	<Null>	<Null>	<Null>	<Null>	<Null>	<Null>	<Null>	<Null>	<Null>	<Null>	<Null>	Geological Survey of Canada - Pacific
423	403	Point	<Null>	<Null>	Canada West Coast	Canada West Coast_342	<Null>	<Null>	<Null>	0	<Null>	49.0889	-125.187	0	0	0	0	0	<Null>	0	0	0	0	0	<Null>	0	0	0	<Null>	<Null>	<Null>	0	<Null>	0	<Null>	0	<Null>	<Null>	<Null>	<Null>	<Null>	<Null>	<Null>	<Null>	<Null>	<Null>	<Null>	<Null>	Geological Survey of Canada - Pacific
424	404	Point	<Null>	<Null>	Canada West Coast	Canada West Coast_343	<Null>	<Null>	<Null>	0	<Null>	49.0489	-125.16	0	0	0	0	0	<Null>	0	0	0	0	0	<Null>	0	0	0	<Null>	<Null>	<Null>	0	<Null>	0	<Null>	0	<Null>	<Null>	<Null>	<Null>	<Null>	<Null>	<Null>	<Null>	<Null>	<Null>	<Null>	<Null>	Geological Survey of Canada - Pacific
425	405	Point	<Null>	<Null>	Canada West Coast	Canada West Coast_344	<Null>	<Null>	<Null>	0	<Null>	49.0405	-125.143	0	0	0	0	0	<Null>	0	0	0	0	0	<Null>	0	0	0	<Null>	<Null>	<Null>	0	<Null>	0	<Null>	0	<Null>	<Null>	<Null>	<Null>	<Null>	<Null>	<Null>	<Null>	<Null>	<Null>	<Null>	<Null>	Geological Survey of Canada - Pacific
426	406	Point	<Null>	<Null>	Canada West Coast	Canada West Coast_345	<Null>	<Null>	<Null>	0	<Null>	49.0454	-125.147	0	0	0	0	0	<Null>	0	0	0	0	0	<Null>	0	0	0	<Null>	<Null>	<Null>	0	<Null>	0	<Null>	0	<Null>	<Null>	<Null>	<Null>	<Null>	<Null>	<Null>	<Null>	<Null>	<Null>	<Null>	<Null>	Geological Survey of Canada - Pacific
427	407	Point	<Null>	<Null>	Canada West Coast	Canada West Coast_346	<Null>	<Null>	<Null>	0	<Null>	49.0415	-125.157	0	0	0	0	0	<Null>	0	0	0	0	0	<Null>	0	0	0	<Null>	<Null>	<Null>	0	<Null>	0	<Null>	0	<Null>	<Null>	<Null>	<Null>	<Null>	<Null>	<Null>	<Null>	<Null>	<Null>	<Null>	<Null>	Geological Survey of Canada - Pacific
428	408	Point	<Null>	<Null>	Canada West Coast	Canada West Coast_347	<Null>	<Null>	<Null>	0	<Null>	49.0293	-125.154	0	0	0	0	0	<Null>	0	0	0	0	0	<Null>	0	0	0	<Null>	<Null>	<Null>	0	<Null>	0	<Null>	0	<Null>	<Null>	<Null>	<Null>	<Null>	<Null>	<Null>	<Null>	<Null>	<Null>	<Null>	<Null>	Geological Survey of Canada - Pacific
429	409	Point	<Null>	<Null>	Canada West Coast	Canada West Coast_348	<Null>	<Null>	<Null>	0	<Null>	50.2059	-124.949	0	0	0	0	0	<Null>	0	0	0	0	0	<Null>	0	0	0	<Null>	<Null>	<Null>	0	<Null>	0	<Null>	0	<Null>	<Null>	<Null>	<Null>	<Null>	<Null>	<Null>	<Null>	<Null>	<Null>	<Null>	<Null>	Geological Survey of Canada - Pacific
430	410	Point	<Null>	<Null>	Canada West Coast	Canada West Coast_349	<Null>	<Null>	<Null>	0	<Null>	50.2266	-124.968	0	0	0	0	0	<Null>	0	0	0	0	0	<Null>	0	0	0	<Null>	<Null>	<Null>	0	<Null>	0	<Null>	0	<Null>	<Null>	<Null>	<Null>	<Null>	<Null>	<Null>	<Null>	<Null>	<Null>	<Null>	<Null>	Geological Survey of Canada - Pacific
431	411	Point	<Null>	<Null>	Canada West Coast	Canada West Coast_350	<Null>	<Null>	<Null>	0	<Null>	50.3049	-124.96	0	0	0	0	0	<Null>	0	0	0	0	0	<Null>	0	0	0	<Null>	<Null>	<Null>	0	<Null>	0	<Null>	0	<Null>	<Null>	<Null>	<Null>	<Null>	<Null>	<Null>	<Null>	<Null>	<Null>	<Null>	<Null>	Geological Survey of Canada - Pacific
432	412	Point	<Null>	<Null>	Canada West Coast	Canada West Coast_351	<Null>	<Null>	<Null>	0	<Null>	50.3462	-124.988	0	0	0	0	0	<Null>	0	0	0	0	0	<Null>	0	0	0	<Null>	<Null>	<Null>	0	<Null>	0	<Null>	0	<Null>	<Null>	<Null>	<Null>	<Null>	<Null>	<Null>	<Null>	<Null>	<Null>	<Null>	<Null>	Geological Survey of Canada - Pacific
433	413	Point	<Null>	<Null>	Canada West Coast	Canada West Coast_352	<Null>	<Null>	<Null>	0	<Null>	50.2508	-124.987	0	0	0	0	0	<Null>	0	0	0	0	0	<Null>	0	0	0	<Null>	<Null>	<Null>	0	<Null>	0	<Null>	0	<Null>	<Null>	<Null>	<Null>	<Null>	<Null>	<Null>	<Null>	<Null>	<Null>	<Null>	<Null>	Geological Survey of Canada - Pacific
434	414	Point	<Null>	<Null>	Canada West Coast	Canada West Coast_353	<Null>	<Null>	<Null>	0	<Null>	50.2431	-124.983	0	0	0	0	0	<Null>	0	0	0	0	0	<Null>	0	0	0	<Null>	<Null>	<Null>	0	<Null>	0	<Null>	0	<Null>	<Null>	<Null>	<Null>	<Null>	<Null>	<Null>	<Null>	<Null>	<Null>	<Null>	<Null>	Geological Survey of Canada - Pacific
435	415	Point	<Null>	<Null>	Canada West Coast	Canada West Coast_354	<Null>	<Null>	<Null>	0	<Null>	50.2434	-125.001	0	0	0	0	0	<Null>	0	0	0	0	0	<Null>	0	0	0	<Null>	<Null>	<Null>	0	<Null>	0	<Null>	0	<Null>	<Null>	<Null>	<Null>	<Null>	<Null>	<Null>	<Null>	<Null>	<Null>	<Null>	<Null>	Geological Survey of Canada - Pacific
436	416	Point	<Null>	<Null>	Canada West Coast	Canada West Coast_355	<Null>	<Null>	<Null>	0	<Null>	50.2412	-124.99	0	0	0	0	0	<Null>	0	0	0	0	0	<Null>	0	0	0	<Null>	<Null>	<Null>	0	<Null>	0	<Null>	0	<Null>	<Null>	<Null>	<Null>	<Null>	<Null>	<Null>	<Null>	<Null>	<Null>	<Null>	<Null>	Geological Survey of Canada - Pacific
437	417	Point	<Null>	<Null>	Canada West Coast	Canada West Coast_356	<Null>	<Null>	<Null>	0	<Null>	50.1823	-124.904	0	0	0	0	0	<Null>	0	0	0	0	0	<Null>	0	0	0	<Null>	<Null>	<Null>	0	<Null>	0	<Null>	0	<Null>	<Null>	<Null>	<Null>	<Null>	<Null>	<Null>	<Null>	<Null>	<Null>	<Null>	<Null>	Geological Survey of Canada - Pacific
438	418	Point	<Null>	<Null>	Canada West Coast	Canada West Coast_357	<Null>	<Null>	<Null>	0	<Null>	50.1763	-124.892	0	0	0	0	0	<Null>	0	0	0	0	0	<Null>	0	0	0	<Null>	<Null>	<Null>	0	<Null>	0	<Null>	0	<Null>	<Null>	<Null>	<Null>	<Null>	<Null>	<Null>	<Null>	<Null>	<Null>	<Null>	<Null>	Geological Survey of Canada - Pacific
439	419	Point	<Null>	<Null>	Canada West Coast	Canada West Coast_358	<Null>	<Null>	<Null>	0	<Null>	50.1773	-124.877	0	0	0	0	0	<Null>	0	0	0	0	0	<Null>	0	0	0	<Null>	<Null>	<Null>	0	<Null>	0	<Null>	0	<Null>	<Null>	<Null>	<Null>	<Null>	<Null>	<Null>	<Null>	<Null>	<Null>	<Null>	<Null>	Geological Survey of Canada - Pacific
440	420	Point	<Null>	<Null>	Canada West Coast	Canada West Coast_359	<Null>	<Null>	<Null>	0	<Null>	50.2836	-124.953	0	0	0	0	0	<Null>	0	0	0	0	0	<Null>	0	0	0	<Null>	<Null>	<Null>	0	<Null>	0	<Null>	0	<Null>	<Null>	<Null>	<Null>	<Null>	<Null>	<Null>	<Null>	<Null>	<Null>	<Null>	<Null>	Geological Survey of Canada - Pacific
441	421	Point	<Null>	<Null>	Canada West Coast	Canada West Coast_360	<Null>	<Null>	<Null>	0	<Null>	50.1561	-124.689	0	0	0	0	0	<Null>	0	0	0	0	0	<Null>	0	0	0	<Null>	<Null>	<Null>	0	<Null>	0	<Null>	0	<Null>	<Null>	<Null>	<Null>	<Null>	<Null>	<Null>	<Null>	<Null>	<Null>	<Null>	<Null>	Geological Survey of Canada - Pacific
442	422	Point	<Null>	<Null>	Canada West Coast	Canada West Coast_361	<Null>	<Null>	<Null>	0	<Null>	50.1695	-124.683	0	0	0	0	0	<Null>	0	0	0	0	0	<Null>	0	0	0	<Null>	<Null>	<Null>	0	<Null>	0	<Null>	0	<Null>	<Null>	<Null>	<Null>	<Null>	<Null>	<Null>	<Null>	<Null>	<Null>	<Null>	<Null>	Geological Survey of Canada - Pacific
443	423	Point	<Null>	<Null>	Canada West Coast	Canada West Coast_362	<Null>	<Null>	<Null>	0	<Null>	50.118	-124.897	0	0	0	0	0	<Null>	0	0	0	0	0	<Null>	0	0	0	<Null>	<Null>	<Null>	0	<Null>	0	<Null>	0	<Null>	<Null>	<Null>	<Null>	<Null>	<Null>	<Null>	<Null>	<Null>	<Null>	<Null>	<Null>	Geological Survey of Canada - Pacific
444	424	Point	<Null>	<Null>	Canada West Coast	Canada West Coast_363	<Null>	<Null>	<Null>	0	<Null>	50.109	-124.891	0	0	0	0	0	<Null>	0	0	0	0	0	<Null>	0	0	0	<Null>	<Null>	<Null>	0	<Null>	0	<Null>	0	<Null>	<Null>	<Null>	<Null>	<Null>	<Null>	<Null>	<Null>	<Null>	<Null>	<Null>	<Null>	Geological Survey of Canada - Pacific
445	425	Point	<Null>	<Null>	Canada West Coast	Canada West Coast_364	<Null>	<Null>	<Null>	0	<Null>	49.963	-124.85	0	0	0	0	0	<Null>	0	0	0	0	0	<Null>	0	0	0	<Null>	<Null>	<Null>	0	<Null>	0	<Null>	0	<Null>	<Null>	<Null>	<Null>	<Null>	<Null>	<Null>	<Null>	<Null>	<Null>	<Null>	<Null>	Geological Survey of Canada - Pacific
446	426	Point	<Null>	<Null>	Canada West Coast	Canada West Coast_365	<Null>	<Null>	<Null>	0	<Null>	49.9584	-124.786	0	0	0	0	0	<Null>	0	0	0	0	0	<Null>	0	0	0	<Null>	<Null>	<Null>	0	<Null>	0	<Null>	0	<Null>	<Null>	<Null>	<Null>	<Null>	<Null>	<Null>	<Null>	<Null>	<Null>	<Null>	<Null>	Geological Survey of Canada - Pacific
447	427	Point	<Null>	<Null>	Canada West Coast	Canada West Coast_366	<Null>	<Null>	<Null>	0	<Null>	49.9509	-124.756	0	0	0	0	0	<Null>	0	0	0	0	0	<Null>	0	0	0	<Null>	<Null>	<Null>	0	<Null>	0	<Null>	0	<Null>	<Null>	<Null>	<Null>	<Null>	<Null>	<Null>	<Null>	<Null>	<Null>	<Null>	<Null>	Geological Survey of Canada - Pacific
448	428	Point	<Null>	<Null>	Canada West Coast	Canada West Coast_367	<Null>	<Null>	<Null>	0	<Null>	49.7021	-124.566	0	0	0	0	0	<Null>	0	0	0	0	0	<Null>	0	0	0	<Null>	<Null>	<Null>	0	<Null>	0	<Null>	0	<Null>	<Null>	<Null>	<Null>	<Null>	<Null>	<Null>	<Null>	<Null>	<Null>	<Null>	<Null>	Geological Survey of Canada - Pacific
449	429	Point	<Null>	<Null>	Canada West Coast	Canada West Coast_368	<Null>	<Null>	<Null>	0	<Null>	49.6766	-124.527	0	0	0	0	0	<Null>	0	0	0	0	0	<Null>	0	0	0	<Null>	<Null>	<Null>	0	<Null>	0	<Null>	0	<Null>	<Null>	<Null>	<Null>	<Null>	<Null>	<Null>	<Null>	<Null>	<Null>	<Null>	<Null>	Geological Survey of Canada - Pacific
450	430	Point	<Null>	<Null>	Canada West Coast	Canada West Coast_369	<Null>	<Null>	<Null>	0	<Null>	49.2756	-124.006	0	0	0	0	0	<Null>	0	0	0	0	0	<Null>	0	0	0	<Null>	<Null>	<Null>	0	<Null>	0	<Null>	0	<Null>	<Null>	<Null>	<Null>	<Null>	<Null>	<Null>	<Null>	<Null>	<Null>	<Null>	<Null>	Geological Survey of Canada - Pacific
451	431	Point	<Null>	<Null>	Canada West Coast	Canada West Coast_370	<Null>	<Null>	<Null>	0	<Null>	49.196	-123.799	0	0	0	0	0	<Null>	0	0	0	0	0	<Null>	0	0	0	<Null>	<Null>	<Null>	0	<Null>	0	<Null>	0	<Null>	<Null>	<Null>	<Null>	<Null>	<Null>	<Null>	<Null>	<Null>	<Null>	<Null>	<Null>	Geological Survey of Canada - Pacific
452	432	Point	<Null>	<Null>	Canada West Coast	Canada West Coast_371	<Null>	<Null>	<Null>	0	<Null>	48.8503	-123.589	0	0	0	0	0	<Null>	0	0	0	0	0	<Null>	0	0	0	<Null>	<Null>	<Null>	0	<Null>	0	<Null>	0	<Null>	<Null>	<Null>	<Null>	<Null>	<Null>	<Null>	<Null>	<Null>	<Null>	<Null>	<Null>	Geological Survey of Canada - Pacific
453	433	Point	<Null>	<Null>	Canada West Coast	Canada West Coast_372	<Null>	<Null>	<Null>	0	<Null>	48.8533	-123.598	0	0	0	0	0	<Null>	0	0	0	0	0	<Null>	0	0	0	<Null>	<Null>	<Null>	0	<Null>	0	<Null>	0	<Null>	<Null>	<Null>	<Null>	<Null>	<Null>	<Null>	<Null>	<Null>	<Null>	<Null>	<Null>	Geological Survey of Canada - Pacific
454	434	Point	<Null>	<Null>	Canada West Coast	Canada West Coast_373	<Null>	<Null>	<Null>	0	<Null>	48.8153	-123.603	0	0	0	0	0	<Null>	0	0	0	0	0	<Null>	0	0	0	<Null>	<Null>	<Null>	0	<Null>	0	<Null>	0	<Null>	<Null>	<Null>	<Null>	<Null>	<Null>	<Null>	<Null>	<Null>	<Null>	<Null>	<Null>	Geological Survey of Canada - Pacific
455	435	Point	<Null>	<Null>	Canada West Coast	Canada West Coast_374	<Null>	<Null>	<Null>	0	<Null>	49.5971	-123.23	0	0	0	0	0	<Null>	0	0	0	0	0	<Null>	0	0	0	<Null>	<Null>	<Null>	0	<Null>	0	<Null>	0	<Null>	<Null>	<Null>	<Null>	<Null>	<Null>	<Null>	<Null>	<Null>	<Null>	<Null>	<Null>	Geological Survey of Canada - Pacific
456	436	Point	<Null>	<Null>	Canada West Coast	Canada West Coast_375	<Null>	<Null>	<Null>	0	<Null>	48.5259	-123.541	0	0	0	0	0	<Null>	0	0	0	0	0	<Null>	0	0	0	<Null>	<Null>	<Null>	0	<Null>	0	<Null>	0	<Null>	<Null>	<Null>	<Null>	<Null>	<Null>	<Null>	<Null>	<Null>	<Null>	<Null>	<Null>	Geological Survey of Canada - Pacific
457	437	Point	<Null>	<Null>	Canada West Coast	Canada West Coast_376	<Null>	<Null>	<Null>	0	<Null>	48.5172	-123.537	0	0	0	0	0	<Null>	0	0	0	0	0	<Null>	0	0	0	<Null>	<Null>	<Null>	0	<Null>	0	<Null>	0	<Null>	<Null>	<Null>	<Null>	<Null>	<Null>	<Null>	<Null>	<Null>	<Null>	<Null>	<Null>	Geological Survey of Canada - Pacific
458	438	Point	<Null>	<Null>	Canada West Coast	Canada West Coast_377	<Null>	<Null>	<Null>	0	<Null>	48.5227	-123.537	0	0	0	0	0	<Null>	0	0	0	0	0	<Null>	0	0	0	<Null>	<Null>	<Null>	0	<Null>	0	<Null>	0	<Null>	<Null>	<Null>	<Null>	<Null>	<Null>	<Null>	<Null>	<Null>	<Null>	<Null>	<Null>	Geological Survey of Canada - Pacific
459	439	Point	<Null>	<Null>	Canada West Coast	Canada West Coast_378	<Null>	<Null>	<Null>	0	<Null>	48.5065	-123.551	0	0	0	0	0	<Null>	0	0	0	0	0	<Null>	0	0	0	<Null>	<Null>	<Null>	0	<Null>	0	<Null>	0	<Null>	<Null>	<Null>	<Null>	<Null>	<Null>	<Null>	<Null>	<Null>	<Null>	<Null>	<Null>	Geological Survey of Canada - Pacific
460	440	Point	<Null>	<Null>	Canada West Coast	Canada West Coast_379	<Null>	<Null>	<Null>	0	<Null>	48.5577	-123.532	0	0	0	0	0	<Null>	0	0	0	0	0	<Null>	0	0	0	<Null>	<Null>	<Null>	0	<Null>	0	<Null>	0	<Null>	<Null>	<Null>	<Null>	<Null>	<Null>	<Null>	<Null>	<Null>	<Null>	<Null>	<Null>	Geological Survey of Canada - Pacific
461	441	Point	<Null>	<Null>	Canada West Coast	Canada West Coast_380	<Null>	<Null>	<Null>	0	<Null>	48.5697	-123.51	0	0	0	0	0	<Null>	0	0	0	0	0	<Null>	0	0	0	<Null>	<Null>	<Null>	0	<Null>	0	<Null>	0	<Null>	<Null>	<Null>	<Null>	<Null>	<Null>	<Null>	<Null>	<Null>	<Null>	<Null>	<Null>	Geological Survey of Canada - Pacific
462	442	Point	<Null>	<Null>	Canada West Coast	Canada West Coast_381	<Null>	<Null>	<Null>	0	<Null>	49.5266	-124.552	0	0	0	0	0	<Null>	0	0	0	0	0	<Null>	0	0	0	<Null>	<Null>	<Null>	0	<Null>	0	<Null>	0	<Null>	<Null>	<Null>	<Null>	<Null>	<Null>	<Null>	<Null>	<Null>	<Null>	<Null>	<Null>	Geological Survey of Canada - Pacific
463	443	Point	<Null>	<Null>	Canada West Coast	Canada West Coast_382	<Null>	<Null>	<Null>	0	<Null>	49.3023	-123.679	0	0	0	0	0	<Null>	0	0	0	0	0	<Null>	0	0	0	<Null>	<Null>	<Null>	0	<Null>	0	<Null>	0	<Null>	<Null>	<Null>	<Null>	<Null>	<Null>	<Null>	<Null>	<Null>	<Null>	<Null>	<Null>	Geological Survey of Canada - Pacific
464	444	Point	<Null>	<Null>	Canada West Coast	Canada West Coast_383	<Null>	<Null>	<Null>	0	<Null>	49.3052	-123.685	0	0	0	0	0	<Null>	0	0	0	0	0	<Null>	0	0	0	<Null>	<Null>	<Null>	0	<Null>	0	<Null>	0	<Null>	<Null>	<Null>	<Null>	<Null>	<Null>	<Null>	<Null>	<Null>	<Null>	<Null>	<Null>	Geological Survey of Canada - Pacific
465	445	Point	<Null>	<Null>	Canada West Coast	Canada West Coast_384	<Null>	<Null>	<Null>	0	<Null>	49.3008	-123.675	0	0	0	0	0	<Null>	0	0	0	0	0	<Null>	0	0	0	<Null>	<Null>	<Null>	0	<Null>	0	<Null>	0	<Null>	<Null>	<Null>	<Null>	<Null>	<Null>	<Null>	<Null>	<Null>	<Null>	<Null>	<Null>	Geological Survey of Canada - Pacific
466	446	Point	<Null>	<Null>	Canada West Coast	Canada West Coast_385	<Null>	<Null>	<Null>	0	<Null>	49.304	-123.645	0	0	0	0	0	<Null>	0	0	0	0	0	<Null>	0	0	0	<Null>	<Null>	<Null>	0	<Null>	0	<Null>	0	<Null>	<Null>	<Null>	<Null>	<Null>	<Null>	<Null>	<Null>	<Null>	<Null>	<Null>	<Null>	Geological Survey of Canada - Pacific
467	447	Point	<Null>	<Null>	Canada West Coast	Canada West Coast_386	<Null>	<Null>	<Null>	0	<Null>	49.3123	-123.661	0	0	0	0	0	<Null>	0	0	0	0	0	<Null>	0	0	0	<Null>	<Null>	<Null>	0	<Null>	0	<Null>	0	<Null>	<Null>	<Null>	<Null>	<Null>	<Null>	<Null>	<Null>	<Null>	<Null>	<Null>	<Null>	Geological Survey of Canada - Pacific
468	448	Point	<Null>	<Null>	Canada West Coast	Canada West Coast_387	<Null>	<Null>	<Null>	0	<Null>	49.3017	-123.58	0	0	0	0	0	<Null>	0	0	0	0	0	<Null>	0	0	0	<Null>	<Null>	<Null>	0	<Null>	0	<Null>	0	<Null>	<Null>	<Null>	<Null>	<Null>	<Null>	<Null>	<Null>	<Null>	<Null>	<Null>	<Null>	Geological Survey of Canada - Pacific
469	449	Point	<Null>	<Null>	Canada West Coast	Canada West Coast_388	<Null>	<Null>	<Null>	0	<Null>	49.2957	-123.567	0	0	0	0	0	<Null>	0	0	0	0	0	<Null>	0	0	0	<Null>	<Null>	<Null>	0	<Null>	0	<Null>	0	<Null>	<Null>	<Null>	<Null>	<Null>	<Null>	<Null>	<Null>	<Null>	<Null>	<Null>	<Null>	Geological Survey of Canada - Pacific
470	450	Point	<Null>	<Null>	Canada West Coast	Canada West Coast_389	<Null>	<Null>	<Null>	0	<Null>	49.2891	-123.56	0	0	0	0	0	<Null>	0	0	0	0	0	<Null>	0	0	0	<Null>	<Null>	<Null>	0	<Null>	0	<Null>	0	<Null>	<Null>	<Null>	<Null>	<Null>	<Null>	<Null>	<Null>	<Null>	<Null>	<Null>	<Null>	Geological Survey of Canada - Pacific
471	451	Point	<Null>	<Null>	Canada West Coast	Canada West Coast_390	<Null>	<Null>	<Null>	0	<Null>	49.2847	-123.551	0	0	0	0	0	<Null>	0	0	0	0	0	<Null>	0	0	0	<Null>	<Null>	<Null>	0	<Null>	0	<Null>	0	<Null>	<Null>	<Null>	<Null>	<Null>	<Null>	<Null>	<Null>	<Null>	<Null>	<Null>	<Null>	Geological Survey of Canada - Pacific
472	452	Point	<Null>	<Null>	Canada West Coast	Canada West Coast_391	<Null>	<Null>	<Null>	0	<Null>	48.5145	-124.874	0	0	0	0	0	<Null>	0	0	0	0	0	<Null>	0	0	0	<Null>	<Null>	<Null>	0	<Null>	0	<Null>	0	<Null>	<Null>	<Null>	<Null>	<Null>	<Null>	<Null>	<Null>	<Null>	<Null>	<Null>	<Null>	Geological Survey of Canada - Pacific
473	453	Point	<Null>	<Null>	Canada West Coast	Canada West Coast_392	<Null>	<Null>	<Null>	0	<Null>	48.503	-124.861	0	0	0	0	0	<Null>	0	0	0	0	0	<Null>	0	0	0	<Null>	<Null>	<Null>	0	<Null>	0	<Null>	0	<Null>	<Null>	<Null>	<Null>	<Null>	<Null>	<Null>	<Null>	<Null>	<Null>	<Null>	<Null>	Geological Survey of Canada - Pacific
474	454	Point	<Null>	<Null>	Canada West Coast	Canada West Coast_393	<Null>	<Null>	<Null>	0	<Null>	49.6695	-124.07	0	0	0	0	0	<Null>	0	0	0	0	0	<Null>	0	0	0	<Null>	<Null>	<Null>	0	<Null>	0	<Null>	0	<Null>	<Null>	<Null>	<Null>	<Null>	<Null>	<Null>	<Null>	<Null>	<Null>	<Null>	<Null>	Geological Survey of Canada - Pacific
475	455	Point	<Null>	<Null>	Canada West Coast	Canada West Coast_394	<Null>	<Null>	<Null>	0	<Null>	50.4132	-124.513	0	0	0	0	0	<Null>	0	0	0	0	0	<Null>	0	0	0	<Null>	<Null>	<Null>	0	<Null>	0	<Null>	0	<Null>	<Null>	<Null>	<Null>	<Null>	<Null>	<Null>	<Null>	<Null>	<Null>	<Null>	<Null>	Geological Survey of Canada - Pacific
476	456	Point	<Null>	<Null>	Canada West Coast	Canada West Coast_395	<Null>	<Null>	<Null>	0	<Null>	50.4288	-124.474	0	0	0	0	0	<Null>	0	0	0	0	0	<Null>	0	0	0	<Null>	<Null>	<Null>	0	<Null>	0	<Null>	0	<Null>	<Null>	<Null>	<Null>	<Null>	<Null>	<Null>	<Null>	<Null>	<Null>	<Null>	<Null>	Geological Survey of Canada - Pacific
477	457	Point	<Null>	<Null>	Canada West Coast	Canada West Coast_396	<Null>	<Null>	<Null>	0	<Null>	50.4296	-124.467	0	0	0	0	0	<Null>	0	0	0	0	0	<Null>	0	0	0	<Null>	<Null>	<Null>	0	<Null>	0	<Null>	0	<Null>	<Null>	<Null>	<Null>	<Null>	<Null>	<Null>	<Null>	<Null>	<Null>	<Null>	<Null>	Geological Survey of Canada - Pacific
478	458	Point	<Null>	<Null>	Canada West Coast	Canada West Coast_397	<Null>	<Null>	<Null>	0	<Null>	50.4333	-124.453	0	0	0	0	0	<Null>	0	0	0	0	0	<Null>	0	0	0	<Null>	<Null>	<Null>	0	<Null>	0	<Null>	0	<Null>	<Null>	<Null>	<Null>	<Null>	<Null>	<Null>	<Null>	<Null>	<Null>	<Null>	<Null>	Geological Survey of Canada - Pacific
479	459	Point	<Null>	<Null>	Canada West Coast	Canada West Coast_398	<Null>	<Null>	<Null>	0	<Null>	50.4421	-124.413	0	0	0	0	0	<Null>	0	0	0	0	0	<Null>	0	0	0	<Null>	<Null>	<Null>	0	<Null>	0	<Null>	0	<Null>	<Null>	<Null>	<Null>	<Null>	<Null>	<Null>	<Null>	<Null>	<Null>	<Null>	<Null>	Geological Survey of Canada - Pacific
480	460	Point	<Null>	<Null>	Canada West Coast	Canada West Coast_399	<Null>	<Null>	<Null>	0	<Null>	50.4409	-124.418	0	0	0	0	0	<Null>	0	0	0	0	0	<Null>	0	0	0	<Null>	<Null>	<Null>	0	<Null>	0	<Null>	0	<Null>	<Null>	<Null>	<Null>	<Null>	<Null>	<Null>	<Null>	<Null>	<Null>	<Null>	<Null>	Geological Survey of Canada - Pacific
481	461	Point	<Null>	<Null>	Canada West Coast	Canada West Coast_400	<Null>	<Null>	<Null>	0	<Null>	50.4417	-124.421	0	0	0	0	0	<Null>	0	0	0	0	0	<Null>	0	0	0	<Null>	<Null>	<Null>	0	<Null>	0	<Null>	0	<Null>	<Null>	<Null>	<Null>	<Null>	<Null>	<Null>	<Null>	<Null>	<Null>	<Null>	<Null>	Geological Survey of Canada - Pacific
482	462	Point	<Null>	<Null>	Canada West Coast	Canada West Coast_401	<Null>	<Null>	<Null>	0	<Null>	50.8774	-124.825	0	0	0	0	0	<Null>	0	0	0	0	0	<Null>	0	0	0	<Null>	<Null>	<Null>	0	<Null>	0	<Null>	0	<Null>	<Null>	<Null>	<Null>	<Null>	<Null>	<Null>	<Null>	<Null>	<Null>	<Null>	<Null>	Geological Survey of Canada - Pacific
483	463	Point	<Null>	<Null>	Canada West Coast	Canada West Coast_402	<Null>	<Null>	<Null>	0	<Null>	50.8798	-124.823	0	0	0	0	0	<Null>	0	0	0	0	0	<Null>	0	0	0	<Null>	<Null>	<Null>	0	<Null>	0	<Null>	0	<Null>	<Null>	<Null>	<Null>	<Null>	<Null>	<Null>	<Null>	<Null>	<Null>	<Null>	<Null>	Geological Survey of Canada - Pacific
484	464	Point	<Null>	<Null>	Canada West Coast	Canada West Coast_403	<Null>	<Null>	<Null>	0	<Null>	50.8825	-124.822	0	0	0	0	0	<Null>	0	0	0	0	0	<Null>	0	0	0	<Null>	<Null>	<Null>	0	<Null>	0	<Null>	0	<Null>	<Null>	<Null>	<Null>	<Null>	<Null>	<Null>	<Null>	<Null>	<Null>	<Null>	<Null>	Geological Survey of Canada - Pacific
485	465	Point	<Null>	<Null>	Canada West Coast	Canada West Coast_404	<Null>	<Null>	<Null>	0	<Null>	50.8769	-124.826	0	0	0	0	0	<Null>	0	0	0	0	0	<Null>	0	0	0	<Null>	<Null>	<Null>	0	<Null>	0	<Null>	0	<Null>	<Null>	<Null>	<Null>	<Null>	<Null>	<Null>	<Null>	<Null>	<Null>	<Null>	<Null>	Geological Survey of Canada - Pacific
486	466	Point	<Null>	<Null>	Canada West Coast	Canada West Coast_405	<Null>	<Null>	<Null>	0	<Null>	50.8477	-124.896	0	0	0	0	0	<Null>	0	0	0	0	0	<Null>	0	0	0	<Null>	<Null>	<Null>	0	<Null>	0	<Null>	0	<Null>	<Null>	<Null>	<Null>	<Null>	<Null>	<Null>	<Null>	<Null>	<Null>	<Null>	<Null>	Geological Survey of Canada - Pacific
487	467	Point	<Null>	<Null>	Canada West Coast	Canada West Coast_406	<Null>	<Null>	<Null>	0	<Null>	50.8492	-124.894	0	0	0	0	0	<Null>	0	0	0	0	0	<Null>	0	0	0	<Null>	<Null>	<Null>	0	<Null>	0	<Null>	0	<Null>	<Null>	<Null>	<Null>	<Null>	<Null>	<Null>	<Null>	<Null>	<Null>	<Null>	<Null>	Geological Survey of Canada - Pacific
488	468	Point	<Null>	<Null>	Canada West Coast	Canada West Coast_407	<Null>	<Null>	<Null>	0	<Null>	50.8506	-124.892	0	0	0	0	0	<Null>	0	0	0	0	0	<Null>	0	0	0	<Null>	<Null>	<Null>	0	<Null>	0	<Null>	0	<Null>	<Null>	<Null>	<Null>	<Null>	<Null>	<Null>	<Null>	<Null>	<Null>	<Null>	<Null>	Geological Survey of Canada - Pacific
489	469	Point	<Null>	<Null>	Canada West Coast	Canada West Coast_408	<Null>	<Null>	<Null>	0	<Null>	50.8517	-124.892	0	0	0	0	0	<Null>	0	0	0	0	0	<Null>	0	0	0	<Null>	<Null>	<Null>	0	<Null>	0	<Null>	0	<Null>	<Null>	<Null>	<Null>	<Null>	<Null>	<Null>	<Null>	<Null>	<Null>	<Null>	<Null>	Geological Survey of Canada - Pacific
490	470	Point	<Null>	<Null>	Canada West Coast	Canada West Coast_409	<Null>	<Null>	<Null>	0	<Null>	50.8526	-124.892	0	0	0	0	0	<Null>	0	0	0	0	0	<Null>	0	0	0	<Null>	<Null>	<Null>	0	<Null>	0	<Null>	0	<Null>	<Null>	<Null>	<Null>	<Null>	<Null>	<Null>	<Null>	<Null>	<Null>	<Null>	<Null>	Geological Survey of Canada - Pacific
491	471	Point	<Null>	<Null>	Canada West Coast	Canada West Coast_410	<Null>	<Null>	<Null>	0	<Null>	50.4029	-125.323	0	0	0	0	0	<Null>	0	0	0	0	0	<Null>	0	0	0	<Null>	<Null>	<Null>	0	<Null>	0	<Null>	0	<Null>	<Null>	<Null>	<Null>	<Null>	<Null>	<Null>	<Null>	<Null>	<Null>	<Null>	<Null>	Geological Survey of Canada - Pacific
492	472	Point	<Null>	<Null>	Canada West Coast	Canada West Coast_411	<Null>	<Null>	<Null>	0	<Null>	50.4346	-125.307	0	0	0	0	0	<Null>	0	0	0	0	0	<Null>	0	0	0	<Null>	<Null>	<Null>	0	<Null>	0	<Null>	0	<Null>	<Null>	<Null>	<Null>	<Null>	<Null>	<Null>	<Null>	<Null>	<Null>	<Null>	<Null>	Geological Survey of Canada - Pacific
493	473	Point	<Null>	<Null>	Canada West Coast	Canada West Coast_412	<Null>	<Null>	<Null>	0	<Null>	50.4453	-125.301	0	0	0	0	0	<Null>	0	0	0	0	0	<Null>	0	0	0	<Null>	<Null>	<Null>	0	<Null>	0	<Null>	0	<Null>	<Null>	<Null>	<Null>	<Null>	<Null>	<Null>	<Null>	<Null>	<Null>	<Null>	<Null>	Geological Survey of Canada - Pacific
494	474	Point	<Null>	<Null>	Canada West Coast	Canada West Coast_413	<Null>	<Null>	<Null>	0	<Null>	48.9002	-123.645	0	0	0	0	0	<Null>	0	0	0	0	0	<Null>	0	0	0	<Null>	<Null>	<Null>	0	<Null>	0	<Null>	0	<Null>	<Null>	<Null>	<Null>	<Null>	<Null>	<Null>	<Null>	<Null>	<Null>	<Null>	<Null>	Geological Survey of Canada - Pacific
495	475	Point	<Null>	<Null>	Canada West Coast	Canada West Coast_414	<Null>	<Null>	<Null>	0	<Null>	49.2624	-124.095	0	0	0	0	0	<Null>	0	0	0	0	0	<Null>	0	0	0	<Null>	<Null>	<Null>	0	<Null>	0	<Null>	0	<Null>	<Null>	<Null>	<Null>	<Null>	<Null>	<Null>	<Null>	<Null>	<Null>	<Null>	<Null>	Geological Survey of Canada - Pacific
496	476	Point	<Null>	<Null>	Canada West Coast	Canada West Coast_415	<Null>	<Null>	<Null>	0	<Null>	49.4611	-122.876	0	0	0	0	0	<Null>	0	0	0	0	0	<Null>	0	0	0	<Null>	<Null>	<Null>	0	<Null>	0	<Null>	0	<Null>	<Null>	<Null>	<Null>	<Null>	<Null>	<Null>	<Null>	<Null>	<Null>	<Null>	<Null>	Geological Survey of Canada - Pacific
497	477	Point	<Null>	<Null>	Canada West Coast	Canada West Coast_416	<Null>	<Null>	<Null>	0	<Null>	49.4621	-122.881	0	0	0	0	0	<Null>	0	0	0	0	0	<Null>	0	0	0	<Null>	<Null>	<Null>	0	<Null>	0	<Null>	0	<Null>	<Null>	<Null>	<Null>	<Null>	<Null>	<Null>	<Null>	<Null>	<Null>	<Null>	<Null>	Geological Survey of Canada - Pacific
498	478	Point	<Null>	<Null>	Canada West Coast	Canada West Coast_417	<Null>	<Null>	<Null>	0	<Null>	49.4577	-122.884	0	0	0	0	0	<Null>	0	0	0	0	0	<Null>	0	0	0	<Null>	<Null>	<Null>	0	<Null>	0	<Null>	0	<Null>	<Null>	<Null>	<Null>	<Null>	<Null>	<Null>	<Null>	<Null>	<Null>	<Null>	<Null>	Geological Survey of Canada - Pacific
499	479	Point	<Null>	<Null>	Canada West Coast	Canada West Coast_418	<Null>	<Null>	<Null>	0	<Null>	49.4556	-122.883	0	0	0	0	0	<Null>	0	0	0	0	0	<Null>	0	0	0	<Null>	<Null>	<Null>	0	<Null>	0	<Null>	0	<Null>	<Null>	<Null>	<Null>	<Null>	<Null>	<Null>	<Null>	<Null>	<Null>	<Null>	<Null>	Geological Survey of Canada - Pacific
500	480	Point	<Null>	<Null>	Canada West Coast	Canada West Coast_419	<Null>	<Null>	<Null>	0	<Null>	49.4556	-122.868	0	0	0	0	0	<Null>	0	0	0	0	0	<Null>	0	0	0	<Null>	<Null>	<Null>	0	<Null>	0	<Null>	0	<Null>	<Null>	<Null>	<Null>	<Null>	<Null>	<Null>	<Null>	<Null>	<Null>	<Null>	<Null>	Geological Survey of Canada - Pacific
501	481	Point	<Null>	<Null>	Canada West Coast	Canada West Coast_420	<Null>	<Null>	<Null>	0	<Null>	49.4492	-122.866	0	0	0	0	0	<Null>	0	0	0	0	0	<Null>	0	0	0	<Null>	<Null>	<Null>	0	<Null>	0	<Null>	0	<Null>	<Null>	<Null>	<Null>	<Null>	<Null>	<Null>	<Null>	<Null>	<Null>	<Null>	<Null>	Geological Survey of Canada - Pacific
502	482	Point	<Null>	<Null>	Canada West Coast	Canada West Coast_421	<Null>	<Null>	<Null>	0	<Null>	49.4468	-122.862	0	0	0	0	0	<Null>	0	0	0	0	0	<Null>	0	0	0	<Null>	<Null>	<Null>	0	<Null>	0	<Null>	0	<Null>	<Null>	<Null>	<Null>	<Null>	<Null>	<Null>	<Null>	<Null>	<Null>	<Null>	<Null>	Geological Survey of Canada - Pacific
503	483	Point	<Null>	<Null>	Canada West Coast	Canada West Coast_422	<Null>	<Null>	<Null>	0	<Null>	49.4447	-122.869	0	0	0	0	0	<Null>	0	0	0	0	0	<Null>	0	0	0	<Null>	<Null>	<Null>	0	<Null>	0	<Null>	0	<Null>	<Null>	<Null>	<Null>	<Null>	<Null>	<Null>	<Null>	<Null>	<Null>	<Null>	<Null>	Geological Survey of Canada - Pacific
504	484	Point	<Null>	<Null>	Canada West Coast	Canada West Coast_423	<Null>	<Null>	<Null>	0	<Null>	49.4461	-122.861	0	0	0	0	0	<Null>	0	0	0	0	0	<Null>	0	0	0	<Null>	<Null>	<Null>	0	<Null>	0	<Null>	0	<Null>	<Null>	<Null>	<Null>	<Null>	<Null>	<Null>	<Null>	<Null>	<Null>	<Null>	<Null>	Geological Survey of Canada - Pacific
505	485	Point	<Null>	<Null>	Canada West Coast	Canada West Coast_424	<Null>	<Null>	<Null>	0	<Null>	49.4437	-122.861	0	0	0	0	0	<Null>	0	0	0	0	0	<Null>	0	0	0	<Null>	<Null>	<Null>	0	<Null>	0	<Null>	0	<Null>	<Null>	<Null>	<Null>	<Null>	<Null>	<Null>	<Null>	<Null>	<Null>	<Null>	<Null>	Geological Survey of Canada - Pacific
506	486	Point	<Null>	<Null>	Canada West Coast	Canada West Coast_425	<Null>	<Null>	<Null>	0	<Null>	49.4337	-122.857	0	0	0	0	0	<Null>	0	0	0	0	0	<Null>	0	0	0	<Null>	<Null>	<Null>	0	<Null>	0	<Null>	0	<Null>	<Null>	<Null>	<Null>	<Null>	<Null>	<Null>	<Null>	<Null>	<Null>	<Null>	<Null>	Geological Survey of Canada - Pacific
507	487	Point	<Null>	<Null>	Canada West Coast	Canada West Coast_426	<Null>	<Null>	<Null>	0	<Null>	49.4358	-122.862	0	0	0	0	0	<Null>	0	0	0	0	0	<Null>	0	0	0	<Null>	<Null>	<Null>	0	<Null>	0	<Null>	0	<Null>	<Null>	<Null>	<Null>	<Null>	<Null>	<Null>	<Null>	<Null>	<Null>	<Null>	<Null>	Geological Survey of Canada - Pacific
508	488	Point	<Null>	<Null>	Canada West Coast	Canada West Coast_427	<Null>	<Null>	<Null>	0	<Null>	49.4375	-122.864	0	0	0	0	0	<Null>	0	0	0	0	0	<Null>	0	0	0	<Null>	<Null>	<Null>	0	<Null>	0	<Null>	0	<Null>	<Null>	<Null>	<Null>	<Null>	<Null>	<Null>	<Null>	<Null>	<Null>	<Null>	<Null>	Geological Survey of Canada - Pacific
509	489	Point	<Null>	<Null>	Canada West Coast	Canada West Coast_428	<Null>	<Null>	<Null>	0	<Null>	49.4391	-122.865	0	0	0	0	0	<Null>	0	0	0	0	0	<Null>	0	0	0	<Null>	<Null>	<Null>	0	<Null>	0	<Null>	0	<Null>	<Null>	<Null>	<Null>	<Null>	<Null>	<Null>	<Null>	<Null>	<Null>	<Null>	<Null>	Geological Survey of Canada - Pacific
510	490	Point	<Null>	<Null>	Canada West Coast	Canada West Coast_429	<Null>	<Null>	<Null>	0	<Null>	49.4305	-122.861	0	0	0	0	0	<Null>	0	0	0	0	0	<Null>	0	0	0	<Null>	<Null>	<Null>	0	<Null>	0	<Null>	0	<Null>	<Null>	<Null>	<Null>	<Null>	<Null>	<Null>	<Null>	<Null>	<Null>	<Null>	<Null>	Geological Survey of Canada - Pacific
511	491	Point	<Null>	<Null>	Canada West Coast	Canada West Coast_430	<Null>	<Null>	<Null>	0	<Null>	49.4223	-122.859	0	0	0	0	0	<Null>	0	0	0	0	0	<Null>	0	0	0	<Null>	<Null>	<Null>	0	<Null>	0	<Null>	0	<Null>	<Null>	<Null>	<Null>	<Null>	<Null>	<Null>	<Null>	<Null>	<Null>	<Null>	<Null>	Geological Survey of Canada - Pacific
512	492	Point	<Null>	<Null>	Canada West Coast	Canada West Coast_431	<Null>	<Null>	<Null>	0	<Null>	49.4105	-122.864	0	0	0	0	0	<Null>	0	0	0	0	0	<Null>	0	0	0	<Null>	<Null>	<Null>	0	<Null>	0	<Null>	0	<Null>	<Null>	<Null>	<Null>	<Null>	<Null>	<Null>	<Null>	<Null>	<Null>	<Null>	<Null>	Geological Survey of Canada - Pacific
513	493	Point	<Null>	<Null>	Canada West Coast	Canada West Coast_432	<Null>	<Null>	<Null>	0	<Null>	49.3955	-122.881	0	0	0	0	0	<Null>	0	0	0	0	0	<Null>	0	0	0	<Null>	<Null>	<Null>	0	<Null>	0	<Null>	0	<Null>	<Null>	<Null>	<Null>	<Null>	<Null>	<Null>	<Null>	<Null>	<Null>	<Null>	<Null>	Geological Survey of Canada - Pacific
514	494	Point	<Null>	<Null>	Canada West Coast	Canada West Coast_433	<Null>	<Null>	<Null>	0	<Null>	49.4094	-122.879	0	0	0	0	0	<Null>	0	0	0	0	0	<Null>	0	0	0	<Null>	<Null>	<Null>	0	<Null>	0	<Null>	0	<Null>	<Null>	<Null>	<Null>	<Null>	<Null>	<Null>	<Null>	<Null>	<Null>	<Null>	<Null>	Geological Survey of Canada - Pacific
515	495	Point	<Null>	<Null>	Canada West Coast	Canada West Coast_434	<Null>	<Null>	<Null>	0	<Null>	49.3811	-122.868	0	0	0	0	0	<Null>	0	0	0	0	0	<Null>	0	0	0	<Null>	<Null>	<Null>	0	<Null>	0	<Null>	0	<Null>	<Null>	<Null>	<Null>	<Null>	<Null>	<Null>	<Null>	<Null>	<Null>	<Null>	<Null>	Geological Survey of Canada - Pacific
516	496	Point	<Null>	<Null>	Canada West Coast	Canada West Coast_435	<Null>	<Null>	<Null>	0	<Null>	49.3704	-122.876	0	0	0	0	0	<Null>	0	0	0	0	0	<Null>	0	0	0	<Null>	<Null>	<Null>	0	<Null>	0	<Null>	0	<Null>	<Null>	<Null>	<Null>	<Null>	<Null>	<Null>	<Null>	<Null>	<Null>	<Null>	<Null>	Geological Survey of Canada - Pacific
517	497	Point	<Null>	<Null>	Canada West Coast	Canada West Coast_436	<Null>	<Null>	<Null>	0	<Null>	49.3744	-122.886	0	0	0	0	0	<Null>	0	0	0	0	0	<Null>	0	0	0	<Null>	<Null>	<Null>	0	<Null>	0	<Null>	0	<Null>	<Null>	<Null>	<Null>	<Null>	<Null>	<Null>	<Null>	<Null>	<Null>	<Null>	<Null>	Geological Survey of Canada - Pacific
518	498	Point	<Null>	<Null>	Canada West Coast	Canada West Coast_437	<Null>	<Null>	<Null>	0	<Null>	49.3506	-122.905	0	0	0	0	0	<Null>	0	0	0	0	0	<Null>	0	0	0	<Null>	<Null>	<Null>	0	<Null>	0	<Null>	0	<Null>	<Null>	<Null>	<Null>	<Null>	<Null>	<Null>	<Null>	<Null>	<Null>	<Null>	<Null>	Geological Survey of Canada - Pacific
519	499	Point	<Null>	<Null>	Canada West Coast	Canada West Coast_438	<Null>	<Null>	<Null>	0	<Null>	49.3547	-122.905	0	0	0	0	0	<Null>	0	0	0	0	0	<Null>	0	0	0	<Null>	<Null>	<Null>	0	<Null>	0	<Null>	0	<Null>	<Null>	<Null>	<Null>	<Null>	<Null>	<Null>	<Null>	<Null>	<Null>	<Null>	<Null>	Geological Survey of Canada - Pacific
520	500	Point	<Null>	<Null>	Canada West Coast	Canada West Coast_439	<Null>	<Null>	<Null>	0	<Null>	49.3384	-122.923	0	0	0	0	0	<Null>	0	0	0	0	0	<Null>	0	0	0	<Null>	<Null>	<Null>	0	<Null>	0	<Null>	0	<Null>	<Null>	<Null>	<Null>	<Null>	<Null>	<Null>	<Null>	<Null>	<Null>	<Null>	<Null>	Geological Survey of Canada - Pacific
521	501	Point	<Null>	<Null>	Canada West Coast	Canada West Coast_440	<Null>	<Null>	<Null>	0	<Null>	49.2929	-122.978	0	0	0	0	0	<Null>	0	0	0	0	0	<Null>	0	0	0	<Null>	<Null>	<Null>	0	<Null>	0	<Null>	0	<Null>	<Null>	<Null>	<Null>	<Null>	<Null>	<Null>	<Null>	<Null>	<Null>	<Null>	<Null>	Geological Survey of Canada - Pacific
522	502	Point	<Null>	<Null>	Canada West Coast	Canada West Coast_441	<Null>	<Null>	<Null>	0	<Null>	49.2903	-122.918	0	0	0	0	0	<Null>	0	0	0	0	0	<Null>	0	0	0	<Null>	<Null>	<Null>	0	<Null>	0	<Null>	0	<Null>	<Null>	<Null>	<Null>	<Null>	<Null>	<Null>	<Null>	<Null>	<Null>	<Null>	<Null>	Geological Survey of Canada - Pacific
523	503	Point	<Null>	<Null>	Canada West Coast	Canada West Coast_442	<Null>	<Null>	<Null>	0	<Null>	49.2907	-122.914	0	0	0	0	0	<Null>	0	0	0	0	0	<Null>	0	0	0	<Null>	<Null>	<Null>	0	<Null>	0	<Null>	0	<Null>	<Null>	<Null>	<Null>	<Null>	<Null>	<Null>	<Null>	<Null>	<Null>	<Null>	<Null>	Geological Survey of Canada - Pacific
524	504	Point	<Null>	<Null>	Canada West Coast	Canada West Coast_443	<Null>	<Null>	<Null>	0	<Null>	49.2489	-123.312	0	0	0	0	0	<Null>	0	0	0	0	0	<Null>	0	0	0	<Null>	<Null>	<Null>	0	<Null>	0	<Null>	0	<Null>	<Null>	<Null>	<Null>	<Null>	<Null>	<Null>	<Null>	<Null>	<Null>	<Null>	<Null>	Geological Survey of Canada - Pacific
525	505	Point	<Null>	<Null>	Canada West Coast	Canada West Coast_444	<Null>	<Null>	<Null>	0	<Null>	49.1977	-123.334	0	0	0	0	0	<Null>	0	0	0	0	0	<Null>	0	0	0	<Null>	<Null>	<Null>	0	<Null>	0	<Null>	0	<Null>	<Null>	<Null>	<Null>	<Null>	<Null>	<Null>	<Null>	<Null>	<Null>	<Null>	<Null>	Geological Survey of Canada - Pacific
526	506	Point	<Null>	<Null>	Canada West Coast	Canada West Coast_445	<Null>	<Null>	<Null>	0	<Null>	50.3412	-124.758	0	0	0	0	0	<Null>	0	0	0	0	0	<Null>	0	0	0	<Null>	<Null>	<Null>	0	<Null>	0	<Null>	0	<Null>	<Null>	<Null>	<Null>	<Null>	<Null>	<Null>	<Null>	<Null>	<Null>	<Null>	<Null>	Geological Survey of Canada - Pacific
527	507	Point	<Null>	<Null>	Canada West Coast	Canada West Coast_446	<Null>	<Null>	<Null>	0	<Null>	50.344	-124.704	0	0	0	0	0	<Null>	0	0	0	0	0	<Null>	0	0	0	<Null>	<Null>	<Null>	0	<Null>	0	<Null>	0	<Null>	<Null>	<Null>	<Null>	<Null>	<Null>	<Null>	<Null>	<Null>	<Null>	<Null>	<Null>	Geological Survey of Canada - Pacific
528	508	Point	<Null>	<Null>	Canada West Coast	Canada West Coast_447	<Null>	<Null>	<Null>	0	<Null>	50.3682	-124.715	0	0	0	0	0	<Null>	0	0	0	0	0	<Null>	0	0	0	<Null>	<Null>	<Null>	0	<Null>	0	<Null>	0	<Null>	<Null>	<Null>	<Null>	<Null>	<Null>	<Null>	<Null>	<Null>	<Null>	<Null>	<Null>	Geological Survey of Canada - Pacific
529	509	Point	<Null>	<Null>	Canada West Coast	Canada West Coast_448	<Null>	<Null>	<Null>	0	<Null>	50.3726	-124.679	0	0	0	0	0	<Null>	0	0	0	0	0	<Null>	0	0	0	<Null>	<Null>	<Null>	0	<Null>	0	<Null>	0	<Null>	<Null>	<Null>	<Null>	<Null>	<Null>	<Null>	<Null>	<Null>	<Null>	<Null>	<Null>	Geological Survey of Canada - Pacific
530	510	Point	<Null>	<Null>	Canada West Coast	Canada West Coast_449	<Null>	<Null>	<Null>	0	<Null>	50.3789	-124.7	0	0	0	0	0	<Null>	0	0	0	0	0	<Null>	0	0	0	<Null>	<Null>	<Null>	0	<Null>	0	<Null>	0	<Null>	<Null>	<Null>	<Null>	<Null>	<Null>	<Null>	<Null>	<Null>	<Null>	<Null>	<Null>	Geological Survey of Canada - Pacific
531	511	Point	<Null>	<Null>	Canada West Coast	Canada West Coast_450	<Null>	<Null>	<Null>	0	<Null>	50.384	-124.675	0	0	0	0	0	<Null>	0	0	0	0	0	<Null>	0	0	0	<Null>	<Null>	<Null>	0	<Null>	0	<Null>	0	<Null>	<Null>	<Null>	<Null>	<Null>	<Null>	<Null>	<Null>	<Null>	<Null>	<Null>	<Null>	Geological Survey of Canada - Pacific
532	512	Point	<Null>	<Null>	Canada West Coast	Canada West Coast_451	<Null>	<Null>	<Null>	0	<Null>	50.3965	-124.691	0	0	0	0	0	<Null>	0	0	0	0	0	<Null>	0	0	0	<Null>	<Null>	<Null>	0	<Null>	0	<Null>	0	<Null>	<Null>	<Null>	<Null>	<Null>	<Null>	<Null>	<Null>	<Null>	<Null>	<Null>	<Null>	Geological Survey of Canada - Pacific
533	513	Point	<Null>	<Null>	Canada West Coast	Canada West Coast_452	<Null>	<Null>	<Null>	0	<Null>	50.4052	-124.682	0	0	0	0	0	<Null>	0	0	0	0	0	<Null>	0	0	0	<Null>	<Null>	<Null>	0	<Null>	0	<Null>	0	<Null>	<Null>	<Null>	<Null>	<Null>	<Null>	<Null>	<Null>	<Null>	<Null>	<Null>	<Null>	Geological Survey of Canada - Pacific
534	514	Point	<Null>	<Null>	Canada West Coast	Canada West Coast_453	<Null>	<Null>	<Null>	0	<Null>	50.4014	-124.657	0	0	0	0	0	<Null>	0	0	0	0	0	<Null>	0	0	0	<Null>	<Null>	<Null>	0	<Null>	0	<Null>	0	<Null>	<Null>	<Null>	<Null>	<Null>	<Null>	<Null>	<Null>	<Null>	<Null>	<Null>	<Null>	Geological Survey of Canada - Pacific
535	515	Point	<Null>	<Null>	Canada West Coast	Canada West Coast_454	<Null>	<Null>	<Null>	0	<Null>	50.4129	-124.677	0	0	0	0	0	<Null>	0	0	0	0	0	<Null>	0	0	0	<Null>	<Null>	<Null>	0	<Null>	0	<Null>	0	<Null>	<Null>	<Null>	<Null>	<Null>	<Null>	<Null>	<Null>	<Null>	<Null>	<Null>	<Null>	Geological Survey of Canada - Pacific
536	516	Point	<Null>	<Null>	Canada West Coast	Canada West Coast_455	<Null>	<Null>	<Null>	0	<Null>	50.4002	-124.531	0	0	0	0	0	<Null>	0	0	0	0	0	<Null>	0	0	0	<Null>	<Null>	<Null>	0	<Null>	0	<Null>	0	<Null>	<Null>	<Null>	<Null>	<Null>	<Null>	<Null>	<Null>	<Null>	<Null>	<Null>	<Null>	Geological Survey of Canada - Pacific
537	517	Point	<Null>	<Null>	Canada West Coast	Canada West Coast_456	<Null>	<Null>	<Null>	0	<Null>	50.403	-124.626	0	0	0	0	0	<Null>	0	0	0	0	0	<Null>	0	0	0	<Null>	<Null>	<Null>	0	<Null>	0	<Null>	0	<Null>	<Null>	<Null>	<Null>	<Null>	<Null>	<Null>	<Null>	<Null>	<Null>	<Null>	<Null>	Geological Survey of Canada - Pacific
538	518	Point	<Null>	<Null>	Canada West Coast	Canada West Coast_457	<Null>	<Null>	<Null>	0	<Null>	50.4146	-124.619	0	0	0	0	0	<Null>	0	0	0	0	0	<Null>	0	0	0	<Null>	<Null>	<Null>	0	<Null>	0	<Null>	0	<Null>	<Null>	<Null>	<Null>	<Null>	<Null>	<Null>	<Null>	<Null>	<Null>	<Null>	<Null>	Geological Survey of Canada - Pacific
539	519	Point	<Null>	<Null>	Canada West Coast	Canada West Coast_458	<Null>	<Null>	<Null>	0	<Null>	50.3803	-124.952	0	0	0	0	0	<Null>	0	0	0	0	0	<Null>	0	0	0	<Null>	<Null>	<Null>	0	<Null>	0	<Null>	0	<Null>	<Null>	<Null>	<Null>	<Null>	<Null>	<Null>	<Null>	<Null>	<Null>	<Null>	<Null>	Geological Survey of Canada - Pacific
540	520	Point	<Null>	<Null>	Canada West Coast	Canada West Coast_459	<Null>	<Null>	<Null>	0	<Null>	49.5823	-123.236	0	0	0	0	0	<Null>	0	0	0	0	0	<Null>	0	0	0	<Null>	<Null>	<Null>	0	<Null>	0	<Null>	0	<Null>	<Null>	<Null>	<Null>	<Null>	<Null>	<Null>	<Null>	<Null>	<Null>	<Null>	<Null>	Geological Survey of Canada - Pacific
541	521	Point	<Null>	<Null>	Canada West Coast	Canada West Coast_460	<Null>	<Null>	<Null>	0	<Null>	49.4573	-123.244	0	0	0	0	0	<Null>	0	0	0	0	0	<Null>	0	0	0	<Null>	<Null>	<Null>	0	<Null>	0	<Null>	0	<Null>	<Null>	<Null>	<Null>	<Null>	<Null>	<Null>	<Null>	<Null>	<Null>	<Null>	<Null>	Geological Survey of Canada - Pacific
542	522	Point	<Null>	<Null>	Canada West Coast	Canada West Coast_461	<Null>	<Null>	<Null>	0	<Null>	49.4308	-123.242	0	0	0	0	0	<Null>	0	0	0	0	0	<Null>	0	0	0	<Null>	<Null>	<Null>	0	<Null>	0	<Null>	0	<Null>	<Null>	<Null>	<Null>	<Null>	<Null>	<Null>	<Null>	<Null>	<Null>	<Null>	<Null>	Geological Survey of Canada - Pacific
543	523	Point	<Null>	<Null>	Canada West Coast	Canada West Coast_462	<Null>	<Null>	<Null>	0	<Null>	49.4361	-123.241	0	0	0	0	0	<Null>	0	0	0	0	0	<Null>	0	0	0	<Null>	<Null>	<Null>	0	<Null>	0	<Null>	0	<Null>	<Null>	<Null>	<Null>	<Null>	<Null>	<Null>	<Null>	<Null>	<Null>	<Null>	<Null>	Geological Survey of Canada - Pacific
544	524	Point	<Null>	<Null>	Canada West Coast	Canada West Coast_463	<Null>	<Null>	<Null>	0	<Null>	49.4407	-123.243	0	0	0	0	0	<Null>	0	0	0	0	0	<Null>	0	0	0	<Null>	<Null>	<Null>	0	<Null>	0	<Null>	0	<Null>	<Null>	<Null>	<Null>	<Null>	<Null>	<Null>	<Null>	<Null>	<Null>	<Null>	<Null>	Geological Survey of Canada - Pacific
545	525	Point	<Null>	<Null>	Canada West Coast	Canada West Coast_464	<Null>	<Null>	<Null>	0	<Null>	49.41	-123.249	0	0	0	0	0	<Null>	0	0	0	0	0	<Null>	0	0	0	<Null>	<Null>	<Null>	0	<Null>	0	<Null>	0	<Null>	<Null>	<Null>	<Null>	<Null>	<Null>	<Null>	<Null>	<Null>	<Null>	<Null>	<Null>	Geological Survey of Canada - Pacific
546	526	Point	<Null>	<Null>	Canada West Coast	Canada West Coast_465	<Null>	<Null>	<Null>	0	<Null>	49.403	-123.253	0	0	0	0	0	<Null>	0	0	0	0	0	<Null>	0	0	0	<Null>	<Null>	<Null>	0	<Null>	0	<Null>	0	<Null>	<Null>	<Null>	<Null>	<Null>	<Null>	<Null>	<Null>	<Null>	<Null>	<Null>	<Null>	Geological Survey of Canada - Pacific
377	527	Point	<Null>	<Null>	Canada West Coast	Canada West Coast_466	<Null>	<Null>	<Null>	0	<Null>	49.6364	-123.255	0	0	0	0	0	<Null>	0	0	0	0	0	<Null>	0	0	0	<Null>	<Null>	<Null>	0	<Null>	0	<Null>	0	<Null>	<Null>	<Null>	<Null>	<Null>	<Null>	<Null>	<Null>	<Null>	<Null>	<Null>	<Null>	Geological Survey of Canada - Pacific
378	528	Point	<Null>	<Null>	Canada West Coast	Canada West Coast_467	<Null>	<Null>	<Null>	0	<Null>	49.6569	-123.219	0	0	0	0	0	<Null>	0	0	0	0	0	<Null>	0	0	0	<Null>	<Null>	<Null>	0	<Null>	0	<Null>	0	<Null>	<Null>	<Null>	<Null>	<Null>	<Null>	<Null>	<Null>	<Null>	<Null>	<Null>	<Null>	Geological Survey of Canada - Pacific
379	529	Point	<Null>	<Null>	Canada West Coast	Canada West Coast_468	<Null>	<Null>	<Null>	0	<Null>	49.6594	-123.209	0	0	0	0	0	<Null>	0	0	0	0	0	<Null>	0	0	0	<Null>	<Null>	<Null>	0	<Null>	0	<Null>	0	<Null>	<Null>	<Null>	<Null>	<Null>	<Null>	<Null>	<Null>	<Null>	<Null>	<Null>	<Null>	Geological Survey of Canada - Pacific
380	530	Point	<Null>	<Null>	Canada West Coast	Canada West Coast_469	<Null>	<Null>	<Null>	0	<Null>	49.6596	-123.205	0	0	0	0	0	<Null>	0	0	0	0	0	<Null>	0	0	0	<Null>	<Null>	<Null>	0	<Null>	0	<Null>	0	<Null>	<Null>	<Null>	<Null>	<Null>	<Null>	<Null>	<Null>	<Null>	<Null>	<Null>	<Null>	Geological Survey of Canada - Pacific
381	531	Point	<Null>	<Null>	Canada West Coast	Canada West Coast_470	<Null>	<Null>	<Null>	0	<Null>	49.6618	-123.188	0	0	0	0	0	<Null>	0	0	0	0	0	<Null>	0	0	0	<Null>	<Null>	<Null>	0	<Null>	0	<Null>	0	<Null>	<Null>	<Null>	<Null>	<Null>	<Null>	<Null>	<Null>	<Null>	<Null>	<Null>	<Null>	Geological Survey of Canada - Pacific
547	532	Point	<Null>	<Null>	Canada West Coast	Canada West Coast_471	<Null>	<Null>	<Null>	0	<Null>	49.6451	-123.226	0	0	0	0	0	<Null>	0	0	0	0	0	<Null>	0	0	0	<Null>	<Null>	<Null>	0	<Null>	0	<Null>	0	<Null>	<Null>	<Null>	<Null>	<Null>	<Null>	<Null>	<Null>	<Null>	<Null>	<Null>	<Null>	Geological Survey of Canada - Pacific
548	533	Point	<Null>	<Null>	Canada West Coast	Canada West Coast_472	<Null>	<Null>	<Null>	0	<Null>	49.6515	-123.226	0	0	0	0	0	<Null>	0	0	0	0	0	<Null>	0	0	0	<Null>	<Null>	<Null>	0	<Null>	0	<Null>	0	<Null>	<Null>	<Null>	<Null>	<Null>	<Null>	<Null>	<Null>	<Null>	<Null>	<Null>	<Null>	Geological Survey of Canada - Pacific
194	534	Point	<Null>	<Null>	Canada West Coast	Canada West Coast_473	<Null>	<Null>	<Null>	0	<Null>	49.6657	-123.237	0	0	0	0	0	<Null>	0	0	0	0	0	<Null>	0	0	0	<Null>	<Null>	<Null>	0	<Null>	0	<Null>	0	<Null>	<Null>	<Null>	<Null>	<Null>	<Null>	<Null>	<Null>	<Null>	<Null>	<Null>	<Null>	Geological Survey of Canada - Pacific
195	535	Point	<Null>	<Null>	Canada West Coast	Canada West Coast_474	<Null>	<Null>	<Null>	0	<Null>	49.6046	-123.225	0	0	0	0	0	<Null>	0	0	0	0	0	<Null>	0	0	0	<Null>	<Null>	<Null>	0	<Null>	0	<Null>	0	<Null>	<Null>	<Null>	<Null>	<Null>	<Null>	<Null>	<Null>	<Null>	<Null>	<Null>	<Null>	Geological Survey of Canada - Pacific
196	536	Point	<Null>	<Null>	Canada West Coast	Canada West Coast_475	<Null>	<Null>	<Null>	0	<Null>	49.5911	-123.23	0	0	0	0	0	<Null>	0	0	0	0	0	<Null>	0	0	0	<Null>	<Null>	<Null>	0	<Null>	0	<Null>	0	<Null>	<Null>	<Null>	<Null>	<Null>	<Null>	<Null>	<Null>	<Null>	<Null>	<Null>	<Null>	Geological Survey of Canada - Pacific
197	537	Point	<Null>	<Null>	Canada West Coast	Canada West Coast_476	<Null>	<Null>	<Null>	0	<Null>	49.5693	-123.293	0	0	0	0	0	<Null>	0	0	0	0	0	<Null>	0	0	0	<Null>	<Null>	<Null>	0	<Null>	0	<Null>	0	<Null>	<Null>	<Null>	<Null>	<Null>	<Null>	<Null>	<Null>	<Null>	<Null>	<Null>	<Null>	Geological Survey of Canada - Pacific
198	538	Point	<Null>	<Null>	Canada West Coast	Canada West Coast_477	<Null>	<Null>	<Null>	0	<Null>	49.5474	-123.247	0	0	0	0	0	<Null>	0	0	0	0	0	<Null>	0	0	0	<Null>	<Null>	<Null>	0	<Null>	0	<Null>	0	<Null>	<Null>	<Null>	<Null>	<Null>	<Null>	<Null>	<Null>	<Null>	<Null>	<Null>	<Null>	Geological Survey of Canada - Pacific
199	539	Point	<Null>	<Null>	Canada West Coast	Canada West Coast_478	<Null>	<Null>	<Null>	0	<Null>	49.4454	-123.242	0	0	0	0	0	<Null>	0	0	0	0	0	<Null>	0	0	0	<Null>	<Null>	<Null>	0	<Null>	0	<Null>	0	<Null>	<Null>	<Null>	<Null>	<Null>	<Null>	<Null>	<Null>	<Null>	<Null>	<Null>	<Null>	Geological Survey of Canada - Pacific
200	540	Point	<Null>	<Null>	Canada West Coast	Canada West Coast_479	<Null>	<Null>	<Null>	0	<Null>	49.4271	-123.257	0	0	0	0	0	<Null>	0	0	0	0	0	<Null>	0	0	0	<Null>	<Null>	<Null>	0	<Null>	0	<Null>	0	<Null>	<Null>	<Null>	<Null>	<Null>	<Null>	<Null>	<Null>	<Null>	<Null>	<Null>	<Null>	Geological Survey of Canada - Pacific
201	541	Point	<Null>	<Null>	Canada West Coast	Canada West Coast_480	<Null>	<Null>	<Null>	0	<Null>	49.4796	-123.474	0	0	0	0	0	<Null>	0	0	0	0	0	<Null>	0	0	0	<Null>	<Null>	<Null>	0	<Null>	0	<Null>	0	<Null>	<Null>	<Null>	<Null>	<Null>	<Null>	<Null>	<Null>	<Null>	<Null>	<Null>	<Null>	Geological Survey of Canada - Pacific
202	542	Point	<Null>	<Null>	Canada West Coast	Canada West Coast_481	<Null>	<Null>	<Null>	0	<Null>	49.5506	-123.301	0	0	0	0	0	<Null>	0	0	0	0	0	<Null>	0	0	0	<Null>	<Null>	<Null>	0	<Null>	0	<Null>	0	<Null>	<Null>	<Null>	<Null>	<Null>	<Null>	<Null>	<Null>	<Null>	<Null>	<Null>	<Null>	Geological Survey of Canada - Pacific
203	543	Point	<Null>	<Null>	Canada West Coast	Canada West Coast_482	<Null>	<Null>	<Null>	0	<Null>	49.5538	-123.363	0	0	0	0	0	<Null>	0	0	0	0	0	<Null>	0	0	0	<Null>	<Null>	<Null>	0	<Null>	0	<Null>	0	<Null>	<Null>	<Null>	<Null>	<Null>	<Null>	<Null>	<Null>	<Null>	<Null>	<Null>	<Null>	Geological Survey of Canada - Pacific
204	544	Point	<Null>	<Null>	Canada West Coast	Canada West Coast_483	<Null>	<Null>	<Null>	0	<Null>	49.4923	-123.289	0	0	0	0	0	<Null>	0	0	0	0	0	<Null>	0	0	0	<Null>	<Null>	<Null>	0	<Null>	0	<Null>	0	<Null>	<Null>	<Null>	<Null>	<Null>	<Null>	<Null>	<Null>	<Null>	<Null>	<Null>	<Null>	Geological Survey of Canada - Pacific
205	545	Point	<Null>	<Null>	Canada West Coast	Canada West Coast_484	<Null>	<Null>	<Null>	0	<Null>	49.4852	-123.284	0	0	0	0	0	<Null>	0	0	0	0	0	<Null>	0	0	0	<Null>	<Null>	<Null>	0	<Null>	0	<Null>	0	<Null>	<Null>	<Null>	<Null>	<Null>	<Null>	<Null>	<Null>	<Null>	<Null>	<Null>	<Null>	Geological Survey of Canada - Pacific
206	546	Point	<Null>	<Null>	Canada West Coast	Canada West Coast_485	<Null>	<Null>	<Null>	0	<Null>	50.1966	-123.956	0	0	0	0	0	<Null>	0	0	0	0	0	<Null>	0	0	0	<Null>	<Null>	<Null>	0	<Null>	0	<Null>	0	<Null>	<Null>	<Null>	<Null>	<Null>	<Null>	<Null>	<Null>	<Null>	<Null>	<Null>	<Null>	Geological Survey of Canada - Pacific
207	547	Point	<Null>	<Null>	Canada West Coast	Canada West Coast_486	<Null>	<Null>	<Null>	0	<Null>	50.1993	-123.96	0	0	0	0	0	<Null>	0	0	0	0	0	<Null>	0	0	0	<Null>	<Null>	<Null>	0	<Null>	0	<Null>	0	<Null>	<Null>	<Null>	<Null>	<Null>	<Null>	<Null>	<Null>	<Null>	<Null>	<Null>	<Null>	Geological Survey of Canada - Pacific
208	548	Point	<Null>	<Null>	Canada West Coast	Canada West Coast_487	<Null>	<Null>	<Null>	0	<Null>	50.1954	-123.954	0	0	0	0	0	<Null>	0	0	0	0	0	<Null>	0	0	0	<Null>	<Null>	<Null>	0	<Null>	0	<Null>	0	<Null>	<Null>	<Null>	<Null>	<Null>	<Null>	<Null>	<Null>	<Null>	<Null>	<Null>	<Null>	Geological Survey of Canada - Pacific
549	549	Point	<Null>	<Null>	Canada West Coast	Canada West Coast_488	<Null>	<Null>	<Null>	0	<Null>	50.1937	-123.952	0	0	0	0	0	<Null>	0	0	0	0	0	<Null>	0	0	0	<Null>	<Null>	<Null>	0	<Null>	0	<Null>	0	<Null>	<Null>	<Null>	<Null>	<Null>	<Null>	<Null>	<Null>	<Null>	<Null>	<Null>	<Null>	Geological Survey of Canada - Pacific
550	550	Point	<Null>	<Null>	Canada West Coast	Canada West Coast_489	<Null>	<Null>	<Null>	0	<Null>	50.1927	-123.95	0	0	0	0	0	<Null>	0	0	0	0	0	<Null>	0	0	0	<Null>	<Null>	<Null>	0	<Null>	0	<Null>	0	<Null>	<Null>	<Null>	<Null>	<Null>	<Null>	<Null>	<Null>	<Null>	<Null>	<Null>	<Null>	Geological Survey of Canada - Pacific
551	551	Point	<Null>	<Null>	Canada West Coast	Canada West Coast_490	<Null>	<Null>	<Null>	0	<Null>	50.1922	-123.948	0	0	0	0	0	<Null>	0	0	0	0	0	<Null>	0	0	0	<Null>	<Null>	<Null>	0	<Null>	0	<Null>	0	<Null>	<Null>	<Null>	<Null>	<Null>	<Null>	<Null>	<Null>	<Null>	<Null>	<Null>	<Null>	Geological Survey of Canada - Pacific
552	552	Point	<Null>	<Null>	Canada West Coast	Canada West Coast_491	<Null>	<Null>	<Null>	0	<Null>	50.1914	-123.946	0	0	0	0	0	<Null>	0	0	0	0	0	<Null>	0	0	0	<Null>	<Null>	<Null>	0	<Null>	0	<Null>	0	<Null>	<Null>	<Null>	<Null>	<Null>	<Null>	<Null>	<Null>	<Null>	<Null>	<Null>	<Null>	Geological Survey of Canada - Pacific
553	553	Point	<Null>	<Null>	Canada West Coast	Canada West Coast_492	<Null>	<Null>	<Null>	0	<Null>	50.1894	-123.942	0	0	0	0	0	<Null>	0	0	0	0	0	<Null>	0	0	0	<Null>	<Null>	<Null>	0	<Null>	0	<Null>	0	<Null>	<Null>	<Null>	<Null>	<Null>	<Null>	<Null>	<Null>	<Null>	<Null>	<Null>	<Null>	Geological Survey of Canada - Pacific
554	554	Point	<Null>	<Null>	Canada West Coast	Canada West Coast_493	<Null>	<Null>	<Null>	0	<Null>	50.1882	-123.94	0	0	0	0	0	<Null>	0	0	0	0	0	<Null>	0	0	0	<Null>	<Null>	<Null>	0	<Null>	0	<Null>	0	<Null>	<Null>	<Null>	<Null>	<Null>	<Null>	<Null>	<Null>	<Null>	<Null>	<Null>	<Null>	Geological Survey of Canada - Pacific
555	555	Point	<Null>	<Null>	Canada West Coast	Canada West Coast_494	<Null>	<Null>	<Null>	0	<Null>	50.1878	-123.937	0	0	0	0	0	<Null>	0	0	0	0	0	<Null>	0	0	0	<Null>	<Null>	<Null>	0	<Null>	0	<Null>	0	<Null>	<Null>	<Null>	<Null>	<Null>	<Null>	<Null>	<Null>	<Null>	<Null>	<Null>	<Null>	Geological Survey of Canada - Pacific
556	556	Point	<Null>	<Null>	Canada West Coast	Canada West Coast_495	<Null>	<Null>	<Null>	0	<Null>	50.1834	-123.929	0	0	0	0	0	<Null>	0	0	0	0	0	<Null>	0	0	0	<Null>	<Null>	<Null>	0	<Null>	0	<Null>	0	<Null>	<Null>	<Null>	<Null>	<Null>	<Null>	<Null>	<Null>	<Null>	<Null>	<Null>	<Null>	Geological Survey of Canada - Pacific
557	557	Point	<Null>	<Null>	Canada West Coast	Canada West Coast_496	<Null>	<Null>	<Null>	0	<Null>	50.1825	-123.921	0	0	0	0	0	<Null>	0	0	0	0	0	<Null>	0	0	0	<Null>	<Null>	<Null>	0	<Null>	0	<Null>	0	<Null>	<Null>	<Null>	<Null>	<Null>	<Null>	<Null>	<Null>	<Null>	<Null>	<Null>	<Null>	Geological Survey of Canada - Pacific
558	558	Point	<Null>	<Null>	Canada West Coast	Canada West Coast_497	<Null>	<Null>	<Null>	0	<Null>	50.1786	-123.918	0	0	0	0	0	<Null>	0	0	0	0	0	<Null>	0	0	0	<Null>	<Null>	<Null>	0	<Null>	0	<Null>	0	<Null>	<Null>	<Null>	<Null>	<Null>	<Null>	<Null>	<Null>	<Null>	<Null>	<Null>	<Null>	Geological Survey of Canada - Pacific
559	559	Point	<Null>	<Null>	Canada West Coast	Canada West Coast_498	<Null>	<Null>	<Null>	0	<Null>	50.1799	-123.919	0	0	0	0	0	<Null>	0	0	0	0	0	<Null>	0	0	0	<Null>	<Null>	<Null>	0	<Null>	0	<Null>	0	<Null>	<Null>	<Null>	<Null>	<Null>	<Null>	<Null>	<Null>	<Null>	<Null>	<Null>	<Null>	Geological Survey of Canada - Pacific
560	560	Point	<Null>	<Null>	Canada West Coast	Canada West Coast_499	<Null>	<Null>	<Null>	0	<Null>	50.1805	-123.921	0	0	0	0	0	<Null>	0	0	0	0	0	<Null>	0	0	0	<Null>	<Null>	<Null>	0	<Null>	0	<Null>	0	<Null>	<Null>	<Null>	<Null>	<Null>	<Null>	<Null>	<Null>	<Null>	<Null>	<Null>	<Null>	Geological Survey of Canada - Pacific
561	561	Point	<Null>	<Null>	Canada West Coast	Canada West Coast_500	<Null>	<Null>	<Null>	0	<Null>	50.1671	-123.883	0	0	0	0	0	<Null>	0	0	0	0	0	<Null>	0	0	0	<Null>	<Null>	<Null>	0	<Null>	0	<Null>	0	<Null>	<Null>	<Null>	<Null>	<Null>	<Null>	<Null>	<Null>	<Null>	<Null>	<Null>	<Null>	Geological Survey of Canada - Pacific
562	562	Point	<Null>	<Null>	Canada West Coast	Canada West Coast_501	<Null>	<Null>	<Null>	0	<Null>	50.1553	-123.861	0	0	0	0	0	<Null>	0	0	0	0	0	<Null>	0	0	0	<Null>	<Null>	<Null>	0	<Null>	0	<Null>	0	<Null>	<Null>	<Null>	<Null>	<Null>	<Null>	<Null>	<Null>	<Null>	<Null>	<Null>	<Null>	Geological Survey of Canada - Pacific
563	563	Point	<Null>	<Null>	Canada West Coast	Canada West Coast_502	<Null>	<Null>	<Null>	0	<Null>	50.0675	-123.793	0	0	0	0	0	<Null>	0	0	0	0	0	<Null>	0	0	0	<Null>	<Null>	<Null>	0	<Null>	0	<Null>	0	<Null>	<Null>	<Null>	<Null>	<Null>	<Null>	<Null>	<Null>	<Null>	<Null>	<Null>	<Null>	Geological Survey of Canada - Pacific
564	564	Point	<Null>	<Null>	Canada West Coast	Canada West Coast_503	<Null>	<Null>	<Null>	0	<Null>	50.0407	-123.831	0	0	0	0	0	<Null>	0	0	0	0	0	<Null>	0	0	0	<Null>	<Null>	<Null>	0	<Null>	0	<Null>	0	<Null>	<Null>	<Null>	<Null>	<Null>	<Null>	<Null>	<Null>	<Null>	<Null>	<Null>	<Null>	Geological Survey of Canada - Pacific
565	565	Point	<Null>	<Null>	Canada West Coast	Canada West Coast_504	<Null>	<Null>	<Null>	0	<Null>	49.9114	-123.918	0	0	0	0	0	<Null>	0	0	0	0	0	<Null>	0	0	0	<Null>	<Null>	<Null>	0	<Null>	0	<Null>	0	<Null>	<Null>	<Null>	<Null>	<Null>	<Null>	<Null>	<Null>	<Null>	<Null>	<Null>	<Null>	Geological Survey of Canada - Pacific
566	566	Point	<Null>	<Null>	Canada West Coast	Canada West Coast_505	<Null>	<Null>	<Null>	0	<Null>	49.9103	-123.906	0	0	0	0	0	<Null>	0	0	0	0	0	<Null>	0	0	0	<Null>	<Null>	<Null>	0	<Null>	0	<Null>	0	<Null>	<Null>	<Null>	<Null>	<Null>	<Null>	<Null>	<Null>	<Null>	<Null>	<Null>	<Null>	Geological Survey of Canada - Pacific
567	567	Point	<Null>	<Null>	Canada West Coast	Canada West Coast_506	<Null>	<Null>	<Null>	0	<Null>	49.9127	-123.888	0	0	0	0	0	<Null>	0	0	0	0	0	<Null>	0	0	0	<Null>	<Null>	<Null>	0	<Null>	0	<Null>	0	<Null>	<Null>	<Null>	<Null>	<Null>	<Null>	<Null>	<Null>	<Null>	<Null>	<Null>	<Null>	Geological Survey of Canada - Pacific
568	568	Point	<Null>	<Null>	Canada West Coast	Canada West Coast_507	<Null>	<Null>	<Null>	0	<Null>	49.8026	-123.93	0	0	0	0	0	<Null>	0	0	0	0	0	<Null>	0	0	0	<Null>	<Null>	<Null>	0	<Null>	0	<Null>	0	<Null>	<Null>	<Null>	<Null>	<Null>	<Null>	<Null>	<Null>	<Null>	<Null>	<Null>	<Null>	Geological Survey of Canada - Pacific
569	569	Point	<Null>	<Null>	Canada West Coast	Canada West Coast_508	<Null>	<Null>	<Null>	0	<Null>	50.2749	-124.632	0	0	0	0	0	<Null>	0	0	0	0	0	<Null>	0	0	0	<Null>	<Null>	<Null>	0	<Null>	0	<Null>	0	<Null>	<Null>	<Null>	<Null>	<Null>	<Null>	<Null>	<Null>	<Null>	<Null>	<Null>	<Null>	Geological Survey of Canada - Pacific
570	570	Point	<Null>	<Null>	Canada West Coast	Canada West Coast_509	<Null>	<Null>	<Null>	0	<Null>	50.7506	-124.868	0	0	0	0	0	<Null>	0	0	0	0	0	<Null>	0	0	0	<Null>	<Null>	<Null>	0	<Null>	0	<Null>	0	<Null>	<Null>	<Null>	<Null>	<Null>	<Null>	<Null>	<Null>	<Null>	<Null>	<Null>	<Null>	Geological Survey of Canada - Pacific
571	571	Point	<Null>	<Null>	Canada West Coast	Canada West Coast_510	<Null>	<Null>	<Null>	0	<Null>	50.5817	-124.931	0	0	0	0	0	<Null>	0	0	0	0	0	<Null>	0	0	0	<Null>	<Null>	<Null>	0	<Null>	0	<Null>	0	<Null>	<Null>	<Null>	<Null>	<Null>	<Null>	<Null>	<Null>	<Null>	<Null>	<Null>	<Null>	Geological Survey of Canada - Pacific
572	572	Point	<Null>	<Null>	Canada West Coast	Canada West Coast_511	<Null>	<Null>	<Null>	0	<Null>	50.1703	-123.936	0	0	0	0	0	<Null>	0	0	0	0	0	<Null>	0	0	0	<Null>	<Null>	<Null>	0	<Null>	0	<Null>	0	<Null>	<Null>	<Null>	<Null>	<Null>	<Null>	<Null>	<Null>	<Null>	<Null>	<Null>	<Null>	Geological Survey of Canada - Pacific
573	573	Point	<Null>	<Null>	Canada West Coast	Canada West Coast_512	<Null>	<Null>	<Null>	0	<Null>	49.4081	-124.402	0	0	0	0	0	<Null>	0	0	0	0	0	<Null>	0	0	0	<Null>	<Null>	<Null>	0	<Null>	0	<Null>	0	<Null>	<Null>	<Null>	<Null>	<Null>	<Null>	<Null>	<Null>	<Null>	<Null>	<Null>	<Null>	Geological Survey of Canada - Pacific
574	574	Point	<Null>	<Null>	Canada West Coast	Canada West Coast_513	<Null>	<Null>	<Null>	0	<Null>	49.3766	-124.5	0	0	0	0	0	<Null>	0	0	0	0	0	<Null>	0	0	0	<Null>	<Null>	<Null>	0	<Null>	0	<Null>	0	<Null>	<Null>	<Null>	<Null>	<Null>	<Null>	<Null>	<Null>	<Null>	<Null>	<Null>	<Null>	Geological Survey of Canada - Pacific
575	575	Point	<Null>	<Null>	Canada West Coast	Canada West Coast_514	<Null>	<Null>	<Null>	0	<Null>	49.3773	-124.485	0	0	0	0	0	<Null>	0	0	0	0	0	<Null>	0	0	0	<Null>	<Null>	<Null>	0	<Null>	0	<Null>	0	<Null>	<Null>	<Null>	<Null>	<Null>	<Null>	<Null>	<Null>	<Null>	<Null>	<Null>	<Null>	Geological Survey of Canada - Pacific
576	576	Point	<Null>	<Null>	Canada West Coast	Canada West Coast_515	<Null>	<Null>	<Null>	0	<Null>	48.5227	-124.477	0	0	0	0	0	<Null>	0	0	0	0	0	<Null>	0	0	0	<Null>	<Null>	<Null>	0	<Null>	0	<Null>	0	<Null>	<Null>	<Null>	<Null>	<Null>	<Null>	<Null>	<Null>	<Null>	<Null>	<Null>	<Null>	Geological Survey of Canada - Pacific
577	577	Point	<Null>	<Null>	Canada West Coast	Canada West Coast_516	<Null>	<Null>	<Null>	0	<Null>	48.7541	-123.62	0	0	0	0	0	<Null>	0	0	0	0	0	<Null>	0	0	0	<Null>	<Null>	<Null>	0	<Null>	0	<Null>	0	<Null>	<Null>	<Null>	<Null>	<Null>	<Null>	<Null>	<Null>	<Null>	<Null>	<Null>	<Null>	Geological Survey of Canada - Pacific
578	578	Point	<Null>	<Null>	Canada West Coast	Canada West Coast_517	<Null>	<Null>	<Null>	0	<Null>	50.4818	-125.061	0	0	0	0	0	<Null>	0	0	0	0	0	<Null>	0	0	0	<Null>	<Null>	<Null>	0	<Null>	0	<Null>	0	<Null>	<Null>	<Null>	<Null>	<Null>	<Null>	<Null>	<Null>	<Null>	<Null>	<Null>	<Null>	Geological Survey of Canada - Pacific
579	579	Point	<Null>	<Null>	Canada West Coast	Canada West Coast_518	<Null>	<Null>	<Null>	0	<Null>	50.4968	-125.011	0	0	0	0	0	<Null>	0	0	0	0	0	<Null>	0	0	0	<Null>	<Null>	<Null>	0	<Null>	0	<Null>	0	<Null>	<Null>	<Null>	<Null>	<Null>	<Null>	<Null>	<Null>	<Null>	<Null>	<Null>	<Null>	Geological Survey of Canada - Pacific
580	580	Point	<Null>	<Null>	Canada West Coast	Canada West Coast_519	<Null>	<Null>	<Null>	0	<Null>	50.3116	-125.097	0	0	0	0	0	<Null>	0	0	0	0	0	<Null>	0	0	0	<Null>	<Null>	<Null>	0	<Null>	0	<Null>	0	<Null>	<Null>	<Null>	<Null>	<Null>	<Null>	<Null>	<Null>	<Null>	<Null>	<Null>	<Null>	Geological Survey of Canada - Pacific
581	581	Point	<Null>	<Null>	Canada West Coast	Canada West Coast_520	<Null>	<Null>	<Null>	0	<Null>	49.6586	-124.928	0	0	0	0	0	<Null>	0	0	0	0	0	<Null>	0	0	0	<Null>	<Null>	<Null>	0	<Null>	0	<Null>	0	<Null>	<Null>	<Null>	<Null>	<Null>	<Null>	<Null>	<Null>	<Null>	<Null>	<Null>	<Null>	Geological Survey of Canada - Pacific
582	582	Point	<Null>	<Null>	Canada West Coast	Canada West Coast_521	<Null>	<Null>	<Null>	0	<Null>	49.663	-124.926	0	0	0	0	0	<Null>	0	0	0	0	0	<Null>	0	0	0	<Null>	<Null>	<Null>	0	<Null>	0	<Null>	0	<Null>	<Null>	<Null>	<Null>	<Null>	<Null>	<Null>	<Null>	<Null>	<Null>	<Null>	<Null>	Geological Survey of Canada - Pacific
583	583	Point	<Null>	<Null>	Canada West Coast	Canada West Coast_522	<Null>	<Null>	<Null>	0	<Null>	49.6539	-124.911	0	0	0	0	0	<Null>	0	0	0	0	0	<Null>	0	0	0	<Null>	<Null>	<Null>	0	<Null>	0	<Null>	0	<Null>	<Null>	<Null>	<Null>	<Null>	<Null>	<Null>	<Null>	<Null>	<Null>	<Null>	<Null>	Geological Survey of Canada - Pacific
584	584	Point	<Null>	<Null>	Canada West Coast	Canada West Coast_523	<Null>	<Null>	<Null>	0	<Null>	49.6523	-124.894	0	0	0	0	0	<Null>	0	0	0	0	0	<Null>	0	0	0	<Null>	<Null>	<Null>	0	<Null>	0	<Null>	0	<Null>	<Null>	<Null>	<Null>	<Null>	<Null>	<Null>	<Null>	<Null>	<Null>	<Null>	<Null>	Geological Survey of Canada - Pacific
585	585	Point	<Null>	<Null>	Canada West Coast	Canada West Coast_524	<Null>	<Null>	<Null>	0	<Null>	49.6504	-124.889	0	0	0	0	0	<Null>	0	0	0	0	0	<Null>	0	0	0	<Null>	<Null>	<Null>	0	<Null>	0	<Null>	0	<Null>	<Null>	<Null>	<Null>	<Null>	<Null>	<Null>	<Null>	<Null>	<Null>	<Null>	<Null>	Geological Survey of Canada - Pacific
586	586	Point	<Null>	<Null>	Canada West Coast	Canada West Coast_525	<Null>	<Null>	<Null>	0	<Null>	49.6345	-124.871	0	0	0	0	0	<Null>	0	0	0	0	0	<Null>	0	0	0	<Null>	<Null>	<Null>	0	<Null>	0	<Null>	0	<Null>	<Null>	<Null>	<Null>	<Null>	<Null>	<Null>	<Null>	<Null>	<Null>	<Null>	<Null>	Geological Survey of Canada - Pacific
587	587	Point	<Null>	<Null>	Canada West Coast	Canada West Coast_526	<Null>	<Null>	<Null>	0	<Null>	49.6321	-124.868	0	0	0	0	0	<Null>	0	0	0	0	0	<Null>	0	0	0	<Null>	<Null>	<Null>	0	<Null>	0	<Null>	0	<Null>	<Null>	<Null>	<Null>	<Null>	<Null>	<Null>	<Null>	<Null>	<Null>	<Null>	<Null>	Geological Survey of Canada - Pacific
588	588	Point	<Null>	<Null>	Canada West Coast	Canada West Coast_527	<Null>	<Null>	<Null>	0	<Null>	49.6311	-124.866	0	0	0	0	0	<Null>	0	0	0	0	0	<Null>	0	0	0	<Null>	<Null>	<Null>	0	<Null>	0	<Null>	0	<Null>	<Null>	<Null>	<Null>	<Null>	<Null>	<Null>	<Null>	<Null>	<Null>	<Null>	<Null>	Geological Survey of Canada - Pacific
589	589	Point	<Null>	<Null>	Canada West Coast	Canada West Coast_528	<Null>	<Null>	<Null>	0	<Null>	49.6104	-124.845	0	0	0	0	0	<Null>	0	0	0	0	0	<Null>	0	0	0	<Null>	<Null>	<Null>	0	<Null>	0	<Null>	0	<Null>	<Null>	<Null>	<Null>	<Null>	<Null>	<Null>	<Null>	<Null>	<Null>	<Null>	<Null>	Geological Survey of Canada - Pacific
590	590	Point	<Null>	<Null>	Canada West Coast	Canada West Coast_529	<Null>	<Null>	<Null>	0	<Null>	49.6082	-124.846	0	0	0	0	0	<Null>	0	0	0	0	0	<Null>	0	0	0	<Null>	<Null>	<Null>	0	<Null>	0	<Null>	0	<Null>	<Null>	<Null>	<Null>	<Null>	<Null>	<Null>	<Null>	<Null>	<Null>	<Null>	<Null>	Geological Survey of Canada - Pacific
591	591	Point	<Null>	<Null>	Canada West Coast	Canada West Coast_530	<Null>	<Null>	<Null>	0	<Null>	49.6072	-124.843	0	0	0	0	0	<Null>	0	0	0	0	0	<Null>	0	0	0	<Null>	<Null>	<Null>	0	<Null>	0	<Null>	0	<Null>	<Null>	<Null>	<Null>	<Null>	<Null>	<Null>	<Null>	<Null>	<Null>	<Null>	<Null>	Geological Survey of Canada - Pacific
592	592	Point	<Null>	<Null>	Canada West Coast	Canada West Coast_531	<Null>	<Null>	<Null>	0	<Null>	50.295	-124.939	0	0	0	0	0	<Null>	0	0	0	0	0	<Null>	0	0	0	<Null>	<Null>	<Null>	0	<Null>	0	<Null>	0	<Null>	<Null>	<Null>	<Null>	<Null>	<Null>	<Null>	<Null>	<Null>	<Null>	<Null>	<Null>	Geological Survey of Canada - Pacific
593	593	Point	<Null>	<Null>	Canada West Coast	Canada West Coast_532	<Null>	<Null>	<Null>	0	<Null>	50.2962	-124.937	0	0	0	0	0	<Null>	0	0	0	0	0	<Null>	0	0	0	<Null>	<Null>	<Null>	0	<Null>	0	<Null>	0	<Null>	<Null>	<Null>	<Null>	<Null>	<Null>	<Null>	<Null>	<Null>	<Null>	<Null>	<Null>	Geological Survey of Canada - Pacific
594	594	Point	<Null>	<Null>	Canada West Coast	Canada West Coast_533	<Null>	<Null>	<Null>	0	<Null>	50.2972	-124.936	0	0	0	0	0	<Null>	0	0	0	0	0	<Null>	0	0	0	<Null>	<Null>	<Null>	0	<Null>	0	<Null>	0	<Null>	<Null>	<Null>	<Null>	<Null>	<Null>	<Null>	<Null>	<Null>	<Null>	<Null>	<Null>	Geological Survey of Canada - Pacific
595	595	Point	<Null>	<Null>	Canada West Coast	Canada West Coast_534	<Null>	<Null>	<Null>	0	<Null>	50.3162	-124.964	0	0	0	0	0	<Null>	0	0	0	0	0	<Null>	0	0	0	<Null>	<Null>	<Null>	0	<Null>	0	<Null>	0	<Null>	<Null>	<Null>	<Null>	<Null>	<Null>	<Null>	<Null>	<Null>	<Null>	<Null>	<Null>	Geological Survey of Canada - Pacific
596	596	Point	<Null>	<Null>	Canada West Coast	Canada West Coast_535	<Null>	<Null>	<Null>	0	<Null>	50.3204	-124.912	0	0	0	0	0	<Null>	0	0	0	0	0	<Null>	0	0	0	<Null>	<Null>	<Null>	0	<Null>	0	<Null>	0	<Null>	<Null>	<Null>	<Null>	<Null>	<Null>	<Null>	<Null>	<Null>	<Null>	<Null>	<Null>	Geological Survey of Canada - Pacific
597	597	Point	<Null>	<Null>	Canada West Coast	Canada West Coast_536	<Null>	<Null>	<Null>	0	<Null>	50.3118	-124.876	0	0	0	0	0	<Null>	0	0	0	0	0	<Null>	0	0	0	<Null>	<Null>	<Null>	0	<Null>	0	<Null>	0	<Null>	<Null>	<Null>	<Null>	<Null>	<Null>	<Null>	<Null>	<Null>	<Null>	<Null>	<Null>	Geological Survey of Canada - Pacific
598	598	Point	<Null>	<Null>	Canada West Coast	Canada West Coast_537	<Null>	<Null>	<Null>	0	<Null>	50.2979	-124.867	0	0	0	0	0	<Null>	0	0	0	0	0	<Null>	0	0	0	<Null>	<Null>	<Null>	0	<Null>	0	<Null>	0	<Null>	<Null>	<Null>	<Null>	<Null>	<Null>	<Null>	<Null>	<Null>	<Null>	<Null>	<Null>	Geological Survey of Canada - Pacific
599	599	Point	<Null>	<Null>	Canada West Coast	Canada West Coast_538	<Null>	<Null>	<Null>	0	<Null>	50.3346	-124.772	0	0	0	0	0	<Null>	0	0	0	0	0	<Null>	0	0	0	<Null>	<Null>	<Null>	0	<Null>	0	<Null>	0	<Null>	<Null>	<Null>	<Null>	<Null>	<Null>	<Null>	<Null>	<Null>	<Null>	<Null>	<Null>	Geological Survey of Canada - Pacific
600	600	Point	<Null>	<Null>	Canada West Coast	Canada West Coast_539	<Null>	<Null>	<Null>	0	<Null>	49.4819	-124.009	0	0	0	0	0	<Null>	0	0	0	0	0	<Null>	0	0	0	<Null>	<Null>	<Null>	0	<Null>	0	<Null>	0	<Null>	<Null>	<Null>	<Null>	<Null>	<Null>	<Null>	<Null>	<Null>	<Null>	<Null>	<Null>	Geological Survey of Canada - Pacific
601	601	Point	<Null>	<Null>	Canada West Coast	Canada West Coast_540	<Null>	<Null>	<Null>	0	<Null>	49.5232	-124	0	0	0	0	0	<Null>	0	0	0	0	0	<Null>	0	0	0	<Null>	<Null>	<Null>	0	<Null>	0	<Null>	0	<Null>	<Null>	<Null>	<Null>	<Null>	<Null>	<Null>	<Null>	<Null>	<Null>	<Null>	<Null>	Geological Survey of Canada - Pacific
602	602	Point	<Null>	<Null>	Canada West Coast	Canada West Coast_541	<Null>	<Null>	<Null>	0	<Null>	49.6574	-124.19	0	0	0	0	0	<Null>	0	0	0	0	0	<Null>	0	0	0	<Null>	<Null>	<Null>	0	<Null>	0	<Null>	0	<Null>	<Null>	<Null>	<Null>	<Null>	<Null>	<Null>	<Null>	<Null>	<Null>	<Null>	<Null>	Geological Survey of Canada - Pacific
603	603	Point	<Null>	<Null>	Canada West Coast	Canada West Coast_542	<Null>	<Null>	<Null>	0	<Null>	49.5161	-124.232	0	0	0	0	0	<Null>	0	0	0	0	0	<Null>	0	0	0	<Null>	<Null>	<Null>	0	<Null>	0	<Null>	0	<Null>	<Null>	<Null>	<Null>	<Null>	<Null>	<Null>	<Null>	<Null>	<Null>	<Null>	<Null>	Geological Survey of Canada - Pacific
604	604	Point	<Null>	<Null>	Canada West Coast	Canada West Coast_543	<Null>	<Null>	<Null>	0	<Null>	50.404	-124.632	0	0	0	0	0	<Null>	0	0	0	0	0	<Null>	0	0	0	<Null>	<Null>	<Null>	0	<Null>	0	<Null>	0	<Null>	<Null>	<Null>	<Null>	<Null>	<Null>	<Null>	<Null>	<Null>	<Null>	<Null>	<Null>	Geological Survey of Canada - Pacific
605	605	Point	<Null>	<Null>	Canada West Coast	Canada West Coast_544	<Null>	<Null>	<Null>	0	<Null>	50.4634	-124.404	0	0	0	0	0	<Null>	0	0	0	0	0	<Null>	0	0	0	<Null>	<Null>	<Null>	0	<Null>	0	<Null>	0	<Null>	<Null>	<Null>	<Null>	<Null>	<Null>	<Null>	<Null>	<Null>	<Null>	<Null>	<Null>	Geological Survey of Canada - Pacific
606	606	Point	<Null>	<Null>	Canada West Coast	Canada West Coast_545	<Null>	<Null>	<Null>	0	<Null>	50.4735	-124.381	0	0	0	0	0	<Null>	0	0	0	0	0	<Null>	0	0	0	<Null>	<Null>	<Null>	0	<Null>	0	<Null>	0	<Null>	<Null>	<Null>	<Null>	<Null>	<Null>	<Null>	<Null>	<Null>	<Null>	<Null>	<Null>	Geological Survey of Canada - Pacific
607	607	Point	<Null>	<Null>	Canada West Coast	Canada West Coast_546	<Null>	<Null>	<Null>	0	<Null>	50.4581	-124.39	0	0	0	0	0	<Null>	0	0	0	0	0	<Null>	0	0	0	<Null>	<Null>	<Null>	0	<Null>	0	<Null>	0	<Null>	<Null>	<Null>	<Null>	<Null>	<Null>	<Null>	<Null>	<Null>	<Null>	<Null>	<Null>	Geological Survey of Canada - Pacific
608	608	Point	<Null>	<Null>	Canada West Coast	Canada West Coast_547	<Null>	<Null>	<Null>	0	<Null>	50.4006	-124.549	0	0	0	0	0	<Null>	0	0	0	0	0	<Null>	0	0	0	<Null>	<Null>	<Null>	0	<Null>	0	<Null>	0	<Null>	<Null>	<Null>	<Null>	<Null>	<Null>	<Null>	<Null>	<Null>	<Null>	<Null>	<Null>	Geological Survey of Canada - Pacific
609	609	Point	<Null>	<Null>	Canada West Coast	Canada West Coast_548	<Null>	<Null>	<Null>	0	<Null>	50.4014	-124.583	0	0	0	0	0	<Null>	0	0	0	0	0	<Null>	0	0	0	<Null>	<Null>	<Null>	0	<Null>	0	<Null>	0	<Null>	<Null>	<Null>	<Null>	<Null>	<Null>	<Null>	<Null>	<Null>	<Null>	<Null>	<Null>	Geological Survey of Canada - Pacific
610	610	Point	<Null>	<Null>	Canada West Coast	Canada West Coast_549	<Null>	<Null>	<Null>	0	<Null>	50.4012	-124.602	0	0	0	0	0	<Null>	0	0	0	0	0	<Null>	0	0	0	<Null>	<Null>	<Null>	0	<Null>	0	<Null>	0	<Null>	<Null>	<Null>	<Null>	<Null>	<Null>	<Null>	<Null>	<Null>	<Null>	<Null>	<Null>	Geological Survey of Canada - Pacific
611	611	Point	<Null>	<Null>	Canada West Coast	Canada West Coast_550	<Null>	<Null>	<Null>	0	<Null>	50.4011	-124.607	0	0	0	0	0	<Null>	0	0	0	0	0	<Null>	0	0	0	<Null>	<Null>	<Null>	0	<Null>	0	<Null>	0	<Null>	<Null>	<Null>	<Null>	<Null>	<Null>	<Null>	<Null>	<Null>	<Null>	<Null>	<Null>	Geological Survey of Canada - Pacific
612	612	Point	<Null>	<Null>	Canada West Coast	Canada West Coast_551	<Null>	<Null>	<Null>	0	<Null>	50.395	-124.666	0	0	0	0	0	<Null>	0	0	0	0	0	<Null>	0	0	0	<Null>	<Null>	<Null>	0	<Null>	0	<Null>	0	<Null>	<Null>	<Null>	<Null>	<Null>	<Null>	<Null>	<Null>	<Null>	<Null>	<Null>	<Null>	Geological Survey of Canada - Pacific
613	613	Point	<Null>	<Null>	Canada West Coast	Canada West Coast_552	<Null>	<Null>	<Null>	0	<Null>	50.3927	-124.669	0	0	0	0	0	<Null>	0	0	0	0	0	<Null>	0	0	0	<Null>	<Null>	<Null>	0	<Null>	0	<Null>	0	<Null>	<Null>	<Null>	<Null>	<Null>	<Null>	<Null>	<Null>	<Null>	<Null>	<Null>	<Null>	Geological Survey of Canada - Pacific
614	614	Point	<Null>	<Null>	Canada West Coast	Canada West Coast_553	<Null>	<Null>	<Null>	0	<Null>	50.3138	-124.743	0	0	0	0	0	<Null>	0	0	0	0	0	<Null>	0	0	0	<Null>	<Null>	<Null>	0	<Null>	0	<Null>	0	<Null>	<Null>	<Null>	<Null>	<Null>	<Null>	<Null>	<Null>	<Null>	<Null>	<Null>	<Null>	Geological Survey of Canada - Pacific
615	615	Point	<Null>	<Null>	Canada West Coast	Canada West Coast_554	<Null>	<Null>	<Null>	0	<Null>	50.4402	-125.01	0	0	0	0	0	<Null>	0	0	0	0	0	<Null>	0	0	0	<Null>	<Null>	<Null>	0	<Null>	0	<Null>	0	<Null>	<Null>	<Null>	<Null>	<Null>	<Null>	<Null>	<Null>	<Null>	<Null>	<Null>	<Null>	Geological Survey of Canada - Pacific
616	616	Point	<Null>	<Null>	Canada West Coast	Canada West Coast_555	<Null>	<Null>	<Null>	0	<Null>	50.432	-124.996	0	0	0	0	0	<Null>	0	0	0	0	0	<Null>	0	0	0	<Null>	<Null>	<Null>	0	<Null>	0	<Null>	0	<Null>	<Null>	<Null>	<Null>	<Null>	<Null>	<Null>	<Null>	<Null>	<Null>	<Null>	<Null>	Geological Survey of Canada - Pacific
617	617	Point	<Null>	<Null>	Canada West Coast	Canada West Coast_556	<Null>	<Null>	<Null>	0	<Null>	50.4254	-124.971	0	0	0	0	0	<Null>	0	0	0	0	0	<Null>	0	0	0	<Null>	<Null>	<Null>	0	<Null>	0	<Null>	0	<Null>	<Null>	<Null>	<Null>	<Null>	<Null>	<Null>	<Null>	<Null>	<Null>	<Null>	<Null>	Geological Survey of Canada - Pacific
618	618	Point	<Null>	<Null>	Canada West Coast	Canada West Coast_557	<Null>	<Null>	<Null>	0	<Null>	50.4159	-124.966	0	0	0	0	0	<Null>	0	0	0	0	0	<Null>	0	0	0	<Null>	<Null>	<Null>	0	<Null>	0	<Null>	0	<Null>	<Null>	<Null>	<Null>	<Null>	<Null>	<Null>	<Null>	<Null>	<Null>	<Null>	<Null>	Geological Survey of Canada - Pacific
619	619	Point	<Null>	<Null>	Canada West Coast	Canada West Coast_558	<Null>	<Null>	<Null>	0	<Null>	50.4173	-124.981	0	0	0	0	0	<Null>	0	0	0	0	0	<Null>	0	0	0	<Null>	<Null>	<Null>	0	<Null>	0	<Null>	0	<Null>	<Null>	<Null>	<Null>	<Null>	<Null>	<Null>	<Null>	<Null>	<Null>	<Null>	<Null>	Geological Survey of Canada - Pacific
620	620	Point	<Null>	<Null>	Canada West Coast	Canada West Coast_559	<Null>	<Null>	<Null>	0	<Null>	50.3909	-124.969	0	0	0	0	0	<Null>	0	0	0	0	0	<Null>	0	0	0	<Null>	<Null>	<Null>	0	<Null>	0	<Null>	0	<Null>	<Null>	<Null>	<Null>	<Null>	<Null>	<Null>	<Null>	<Null>	<Null>	<Null>	<Null>	Geological Survey of Canada - Pacific
621	621	Point	<Null>	<Null>	Canada West Coast	Canada West Coast_560	<Null>	<Null>	<Null>	0	<Null>	49.5091	-123.471	0	0	0	0	0	<Null>	0	0	0	0	0	<Null>	0	0	0	<Null>	<Null>	<Null>	0	<Null>	0	<Null>	0	<Null>	<Null>	<Null>	<Null>	<Null>	<Null>	<Null>	<Null>	<Null>	<Null>	<Null>	<Null>	Geological Survey of Canada - Pacific
622	622	Point	<Null>	<Null>	Canada West Coast	Canada West Coast_561	<Null>	<Null>	<Null>	0	<Null>	49.5157	-123.451	0	0	0	0	0	<Null>	0	0	0	0	0	<Null>	0	0	0	<Null>	<Null>	<Null>	0	<Null>	0	<Null>	0	<Null>	<Null>	<Null>	<Null>	<Null>	<Null>	<Null>	<Null>	<Null>	<Null>	<Null>	<Null>	Geological Survey of Canada - Pacific
623	623	Point	<Null>	<Null>	Canada West Coast	Canada West Coast_562	<Null>	<Null>	<Null>	0	<Null>	50.5619	-124.902	0	0	0	0	0	<Null>	0	0	0	0	0	<Null>	0	0	0	<Null>	<Null>	<Null>	0	<Null>	0	<Null>	0	<Null>	<Null>	<Null>	<Null>	<Null>	<Null>	<Null>	<Null>	<Null>	<Null>	<Null>	<Null>	Geological Survey of Canada - Pacific
624	624	Point	<Null>	<Null>	Canada West Coast	Canada West Coast_563	<Null>	<Null>	<Null>	0	<Null>	50.5577	-124.921	0	0	0	0	0	<Null>	0	0	0	0	0	<Null>	0	0	0	<Null>	<Null>	<Null>	0	<Null>	0	<Null>	0	<Null>	<Null>	<Null>	<Null>	<Null>	<Null>	<Null>	<Null>	<Null>	<Null>	<Null>	<Null>	Geological Survey of Canada - Pacific
625	625	Point	<Null>	<Null>	Canada West Coast	Canada West Coast_564	<Null>	<Null>	<Null>	0	<Null>	50.5209	-124.955	0	0	0	0	0	<Null>	0	0	0	0	0	<Null>	0	0	0	<Null>	<Null>	<Null>	0	<Null>	0	<Null>	0	<Null>	<Null>	<Null>	<Null>	<Null>	<Null>	<Null>	<Null>	<Null>	<Null>	<Null>	<Null>	Geological Survey of Canada - Pacific
626	626	Point	<Null>	<Null>	Canada West Coast	Canada West Coast_565	<Null>	<Null>	<Null>	0	<Null>	50.3639	-125.077	0	0	0	0	0	<Null>	0	0	0	0	0	<Null>	0	0	0	<Null>	<Null>	<Null>	0	<Null>	0	<Null>	0	<Null>	<Null>	<Null>	<Null>	<Null>	<Null>	<Null>	<Null>	<Null>	<Null>	<Null>	<Null>	Geological Survey of Canada - Pacific
627	627	Point	<Null>	<Null>	Canada West Coast	Canada West Coast_566	<Null>	<Null>	<Null>	0	<Null>	50.3665	-125.068	0	0	0	0	0	<Null>	0	0	0	0	0	<Null>	0	0	0	<Null>	<Null>	<Null>	0	<Null>	0	<Null>	0	<Null>	<Null>	<Null>	<Null>	<Null>	<Null>	<Null>	<Null>	<Null>	<Null>	<Null>	<Null>	Geological Survey of Canada - Pacific
628	628	Point	<Null>	<Null>	Canada West Coast	Canada West Coast_567	<Null>	<Null>	<Null>	0	<Null>	50.4506	-125.089	0	0	0	0	0	<Null>	0	0	0	0	0	<Null>	0	0	0	<Null>	<Null>	<Null>	0	<Null>	0	<Null>	0	<Null>	<Null>	<Null>	<Null>	<Null>	<Null>	<Null>	<Null>	<Null>	<Null>	<Null>	<Null>	Geological Survey of Canada - Pacific
629	629	Point	<Null>	<Null>	Canada West Coast	Canada West Coast_568	<Null>	<Null>	<Null>	0	<Null>	50.4844	-125.102	0	0	0	0	0	<Null>	0	0	0	0	0	<Null>	0	0	0	<Null>	<Null>	<Null>	0	<Null>	0	<Null>	0	<Null>	<Null>	<Null>	<Null>	<Null>	<Null>	<Null>	<Null>	<Null>	<Null>	<Null>	<Null>	Geological Survey of Canada - Pacific
630	630	Point	<Null>	<Null>	Canada West Coast	Canada West Coast_569	<Null>	<Null>	<Null>	0	<Null>	50.4771	-125.099	0	0	0	0	0	<Null>	0	0	0	0	0	<Null>	0	0	0	<Null>	<Null>	<Null>	0	<Null>	0	<Null>	0	<Null>	<Null>	<Null>	<Null>	<Null>	<Null>	<Null>	<Null>	<Null>	<Null>	<Null>	<Null>	Geological Survey of Canada - Pacific
631	631	Point	<Null>	<Null>	Canada West Coast	Canada West Coast_570	<Null>	<Null>	<Null>	0	<Null>	50.5085	-125.053	0	0	0	0	0	<Null>	0	0	0	0	0	<Null>	0	0	0	<Null>	<Null>	<Null>	0	<Null>	0	<Null>	0	<Null>	<Null>	<Null>	<Null>	<Null>	<Null>	<Null>	<Null>	<Null>	<Null>	<Null>	<Null>	Geological Survey of Canada - Pacific
632	632	Point	<Null>	<Null>	Canada West Coast	Canada West Coast_571	<Null>	<Null>	<Null>	0	<Null>	50.5023	-125.081	0	0	0	0	0	<Null>	0	0	0	0	0	<Null>	0	0	0	<Null>	<Null>	<Null>	0	<Null>	0	<Null>	0	<Null>	<Null>	<Null>	<Null>	<Null>	<Null>	<Null>	<Null>	<Null>	<Null>	<Null>	<Null>	Geological Survey of Canada - Pacific
633	633	Point	<Null>	<Null>	Canada West Coast	Canada West Coast_572	<Null>	<Null>	<Null>	0	<Null>	49.8807	-124.634	0	0	0	0	0	<Null>	0	0	0	0	0	<Null>	0	0	0	<Null>	<Null>	<Null>	0	<Null>	0	<Null>	0	<Null>	<Null>	<Null>	<Null>	<Null>	<Null>	<Null>	<Null>	<Null>	<Null>	<Null>	<Null>	Geological Survey of Canada - Pacific
634	634	Point	<Null>	<Null>	Canada West Coast	Canada West Coast_573	<Null>	<Null>	<Null>	0	<Null>	49.7951	-124.533	0	0	0	0	0	<Null>	0	0	0	0	0	<Null>	0	0	0	<Null>	<Null>	<Null>	0	<Null>	0	<Null>	0	<Null>	<Null>	<Null>	<Null>	<Null>	<Null>	<Null>	<Null>	<Null>	<Null>	<Null>	<Null>	Geological Survey of Canada - Pacific
635	635	Point	<Null>	<Null>	Canada West Coast	Canada West Coast_574	<Null>	<Null>	<Null>	0	<Null>	49.6595	-124.578	0	0	0	0	0	<Null>	0	0	0	0	0	<Null>	0	0	0	<Null>	<Null>	<Null>	0	<Null>	0	<Null>	0	<Null>	<Null>	<Null>	<Null>	<Null>	<Null>	<Null>	<Null>	<Null>	<Null>	<Null>	<Null>	Geological Survey of Canada - Pacific
636	636	Point	<Null>	<Null>	Canada West Coast	Canada West Coast_575	<Null>	<Null>	<Null>	0	<Null>	50.8713	-124.885	0	0	0	0	0	<Null>	0	0	0	0	0	<Null>	0	0	0	<Null>	<Null>	<Null>	0	<Null>	0	<Null>	0	<Null>	<Null>	<Null>	<Null>	<Null>	<Null>	<Null>	<Null>	<Null>	<Null>	<Null>	<Null>	Geological Survey of Canada - Pacific
637	637	Point	<Null>	<Null>	Canada West Coast	Canada West Coast_576	<Null>	<Null>	<Null>	0	<Null>	50.8774	-124.882	0	0	0	0	0	<Null>	0	0	0	0	0	<Null>	0	0	0	<Null>	<Null>	<Null>	0	<Null>	0	<Null>	0	<Null>	<Null>	<Null>	<Null>	<Null>	<Null>	<Null>	<Null>	<Null>	<Null>	<Null>	<Null>	Geological Survey of Canada - Pacific
638	638	Point	<Null>	<Null>	Canada West Coast	Canada West Coast_577	<Null>	<Null>	<Null>	0	<Null>	50.8702	-124.892	0	0	0	0	0	<Null>	0	0	0	0	0	<Null>	0	0	0	<Null>	<Null>	<Null>	0	<Null>	0	<Null>	0	<Null>	<Null>	<Null>	<Null>	<Null>	<Null>	<Null>	<Null>	<Null>	<Null>	<Null>	<Null>	Geological Survey of Canada - Pacific
639	639	Point	<Null>	<Null>	Canada West Coast	Canada West Coast_578	<Null>	<Null>	<Null>	0	<Null>	50.8914	-124.864	0	0	0	0	0	<Null>	0	0	0	0	0	<Null>	0	0	0	<Null>	<Null>	<Null>	0	<Null>	0	<Null>	0	<Null>	<Null>	<Null>	<Null>	<Null>	<Null>	<Null>	<Null>	<Null>	<Null>	<Null>	<Null>	Geological Survey of Canada - Pacific
640	640	Point	<Null>	<Null>	Canada West Coast	Canada West Coast_579	<Null>	<Null>	<Null>	0	<Null>	50.8671	-124.845	0	0	0	0	0	<Null>	0	0	0	0	0	<Null>	0	0	0	<Null>	<Null>	<Null>	0	<Null>	0	<Null>	0	<Null>	<Null>	<Null>	<Null>	<Null>	<Null>	<Null>	<Null>	<Null>	<Null>	<Null>	<Null>	Geological Survey of Canada - Pacific
641	641	Point	<Null>	<Null>	Canada West Coast	Canada West Coast_580	<Null>	<Null>	<Null>	0	<Null>	50.8422	-124.854	0	0	0	0	0	<Null>	0	0	0	0	0	<Null>	0	0	0	<Null>	<Null>	<Null>	0	<Null>	0	<Null>	0	<Null>	<Null>	<Null>	<Null>	<Null>	<Null>	<Null>	<Null>	<Null>	<Null>	<Null>	<Null>	Geological Survey of Canada - Pacific
642	642	Point	<Null>	<Null>	Canada West Coast	Canada West Coast_581	<Null>	<Null>	<Null>	0	<Null>	50.8036	-124.976	0	0	0	0	0	<Null>	0	0	0	0	0	<Null>	0	0	0	<Null>	<Null>	<Null>	0	<Null>	0	<Null>	0	<Null>	<Null>	<Null>	<Null>	<Null>	<Null>	<Null>	<Null>	<Null>	<Null>	<Null>	<Null>	Geological Survey of Canada - Pacific
643	643	Point	<Null>	<Null>	Canada West Coast	Canada West Coast_582	<Null>	<Null>	<Null>	0	<Null>	50.7915	-124.964	0	0	0	0	0	<Null>	0	0	0	0	0	<Null>	0	0	0	<Null>	<Null>	<Null>	0	<Null>	0	<Null>	0	<Null>	<Null>	<Null>	<Null>	<Null>	<Null>	<Null>	<Null>	<Null>	<Null>	<Null>	<Null>	Geological Survey of Canada - Pacific
644	644	Point	<Null>	<Null>	Canada West Coast	Canada West Coast_583	<Null>	<Null>	<Null>	0	<Null>	50.5986	-124.916	0	0	0	0	0	<Null>	0	0	0	0	0	<Null>	0	0	0	<Null>	<Null>	<Null>	0	<Null>	0	<Null>	0	<Null>	<Null>	<Null>	<Null>	<Null>	<Null>	<Null>	<Null>	<Null>	<Null>	<Null>	<Null>	Geological Survey of Canada - Pacific
645	645	Point	<Null>	<Null>	Canada West Coast	Canada West Coast_584	<Null>	<Null>	<Null>	0	<Null>	48.3701	-123.928	0	0	0	0	0	<Null>	0	0	0	0	0	<Null>	0	0	0	<Null>	<Null>	<Null>	0	<Null>	0	<Null>	0	<Null>	<Null>	<Null>	<Null>	<Null>	<Null>	<Null>	<Null>	<Null>	<Null>	<Null>	<Null>	Geological Survey of Canada - Pacific
646	646	Point	<Null>	<Null>	Canada West Coast	Canada West Coast_585	<Null>	<Null>	<Null>	0	<Null>	48.3692	-123.926	0	0	0	0	0	<Null>	0	0	0	0	0	<Null>	0	0	0	<Null>	<Null>	<Null>	0	<Null>	0	<Null>	0	<Null>	<Null>	<Null>	<Null>	<Null>	<Null>	<Null>	<Null>	<Null>	<Null>	<Null>	<Null>	Geological Survey of Canada - Pacific
647	647	Point	<Null>	<Null>	Canada West Coast	Canada West Coast_586	<Null>	<Null>	<Null>	0	<Null>	48.368	-123.923	0	0	0	0	0	<Null>	0	0	0	0	0	<Null>	0	0	0	<Null>	<Null>	<Null>	0	<Null>	0	<Null>	0	<Null>	<Null>	<Null>	<Null>	<Null>	<Null>	<Null>	<Null>	<Null>	<Null>	<Null>	<Null>	Geological Survey of Canada - Pacific
648	648	Point	<Null>	<Null>	Canada West Coast	Canada West Coast_587	<Null>	<Null>	<Null>	0	<Null>	48.3677	-123.914	0	0	0	0	0	<Null>	0	0	0	0	0	<Null>	0	0	0	<Null>	<Null>	<Null>	0	<Null>	0	<Null>	0	<Null>	<Null>	<Null>	<Null>	<Null>	<Null>	<Null>	<Null>	<Null>	<Null>	<Null>	<Null>	Geological Survey of Canada - Pacific
649	649	Point	<Null>	<Null>	Canada West Coast	Canada West Coast_588	<Null>	<Null>	<Null>	0	<Null>	48.3653	-123.884	0	0	0	0	0	<Null>	0	0	0	0	0	<Null>	0	0	0	<Null>	<Null>	<Null>	0	<Null>	0	<Null>	0	<Null>	<Null>	<Null>	<Null>	<Null>	<Null>	<Null>	<Null>	<Null>	<Null>	<Null>	<Null>	Geological Survey of Canada - Pacific
650	650	Point	<Null>	<Null>	Canada West Coast	Canada West Coast_589	<Null>	<Null>	<Null>	0	<Null>	48.3663	-123.89	0	0	0	0	0	<Null>	0	0	0	0	0	<Null>	0	0	0	<Null>	<Null>	<Null>	0	<Null>	0	<Null>	0	<Null>	<Null>	<Null>	<Null>	<Null>	<Null>	<Null>	<Null>	<Null>	<Null>	<Null>	<Null>	Geological Survey of Canada - Pacific
651	651	Point	<Null>	<Null>	Canada West Coast	Canada West Coast_590	<Null>	<Null>	<Null>	0	<Null>	48.3465	-123.825	0	0	0	0	0	<Null>	0	0	0	0	0	<Null>	0	0	0	<Null>	<Null>	<Null>	0	<Null>	0	<Null>	0	<Null>	<Null>	<Null>	<Null>	<Null>	<Null>	<Null>	<Null>	<Null>	<Null>	<Null>	<Null>	Geological Survey of Canada - Pacific
652	652	Point	<Null>	<Null>	Canada West Coast	Canada West Coast_591	<Null>	<Null>	<Null>	0	<Null>	48.4783	-124.343	0	0	0	0	0	<Null>	0	0	0	0	0	<Null>	0	0	0	<Null>	<Null>	<Null>	0	<Null>	0	<Null>	0	<Null>	<Null>	<Null>	<Null>	<Null>	<Null>	<Null>	<Null>	<Null>	<Null>	<Null>	<Null>	Geological Survey of Canada - Pacific
653	653	Point	<Null>	<Null>	Canada West Coast	Canada West Coast_592	<Null>	<Null>	<Null>	0	<Null>	50.0157	-124.919	0	0	0	0	0	<Null>	0	0	0	0	0	<Null>	0	0	0	<Null>	<Null>	<Null>	0	<Null>	0	<Null>	0	<Null>	<Null>	<Null>	<Null>	<Null>	<Null>	<Null>	<Null>	<Null>	<Null>	<Null>	<Null>	Geological Survey of Canada - Pacific
654	654	Point	<Null>	<Null>	Canada West Coast	Canada West Coast_593	<Null>	<Null>	<Null>	0	<Null>	50.1451	-123.825	0	0	0	0	0	<Null>	0	0	0	0	0	<Null>	0	0	0	<Null>	<Null>	<Null>	0	<Null>	0	<Null>	0	<Null>	<Null>	<Null>	<Null>	<Null>	<Null>	<Null>	<Null>	<Null>	<Null>	<Null>	<Null>	Geological Survey of Canada - Pacific
655	655	Point	<Null>	<Null>	Canada West Coast	Canada West Coast_594	<Null>	<Null>	<Null>	0	<Null>	50.1509	-123.835	0	0	0	0	0	<Null>	0	0	0	0	0	<Null>	0	0	0	<Null>	<Null>	<Null>	0	<Null>	0	<Null>	0	<Null>	<Null>	<Null>	<Null>	<Null>	<Null>	<Null>	<Null>	<Null>	<Null>	<Null>	<Null>	Geological Survey of Canada - Pacific
656	656	Point	<Null>	<Null>	Canada West Coast	Canada West Coast_595	<Null>	<Null>	<Null>	0	<Null>	50.3004	-124.667	0	0	0	0	0	<Null>	0	0	0	0	0	<Null>	0	0	0	<Null>	<Null>	<Null>	0	<Null>	0	<Null>	0	<Null>	<Null>	<Null>	<Null>	<Null>	<Null>	<Null>	<Null>	<Null>	<Null>	<Null>	<Null>	Geological Survey of Canada - Pacific
657	657	Point	<Null>	<Null>	Canada West Coast	Canada West Coast_596	<Null>	<Null>	<Null>	0	<Null>	50.191	-124.634	0	0	0	0	0	<Null>	0	0	0	0	0	<Null>	0	0	0	<Null>	<Null>	<Null>	0	<Null>	0	<Null>	0	<Null>	<Null>	<Null>	<Null>	<Null>	<Null>	<Null>	<Null>	<Null>	<Null>	<Null>	<Null>	Geological Survey of Canada - Pacific
658	658	Point	<Null>	<Null>	Canada West Coast	Canada West Coast_597	<Null>	<Null>	<Null>	0	<Null>	50.1909	-124.741	0	0	0	0	0	<Null>	0	0	0	0	0	<Null>	0	0	0	<Null>	<Null>	<Null>	0	<Null>	0	<Null>	0	<Null>	<Null>	<Null>	<Null>	<Null>	<Null>	<Null>	<Null>	<Null>	<Null>	<Null>	<Null>	Geological Survey of Canada - Pacific
659	659	Point	<Null>	<Null>	Canada West Coast	Canada West Coast_598	<Null>	<Null>	<Null>	0	<Null>	50.2314	-124.733	0	0	0	0	0	<Null>	0	0	0	0	0	<Null>	0	0	0	<Null>	<Null>	<Null>	0	<Null>	0	<Null>	0	<Null>	<Null>	<Null>	<Null>	<Null>	<Null>	<Null>	<Null>	<Null>	<Null>	<Null>	<Null>	Geological Survey of Canada - Pacific
660	660	Point	<Null>	<Null>	Canada West Coast	Canada West Coast_599	<Null>	<Null>	<Null>	0	<Null>	50.2529	-124.716	0	0	0	0	0	<Null>	0	0	0	0	0	<Null>	0	0	0	<Null>	<Null>	<Null>	0	<Null>	0	<Null>	0	<Null>	<Null>	<Null>	<Null>	<Null>	<Null>	<Null>	<Null>	<Null>	<Null>	<Null>	<Null>	Geological Survey of Canada - Pacific
661	661	Point	<Null>	<Null>	Canada West Coast	Canada West Coast_600	<Null>	<Null>	<Null>	0	<Null>	50.1834	-124.735	0	0	0	0	0	<Null>	0	0	0	0	0	<Null>	0	0	0	<Null>	<Null>	<Null>	0	<Null>	0	<Null>	0	<Null>	<Null>	<Null>	<Null>	<Null>	<Null>	<Null>	<Null>	<Null>	<Null>	<Null>	<Null>	Geological Survey of Canada - Pacific
662	662	Point	<Null>	<Null>	Canada West Coast	Canada West Coast_601	<Null>	<Null>	<Null>	0	<Null>	50.1925	-124.989	0	0	0	0	0	<Null>	0	0	0	0	0	<Null>	0	0	0	<Null>	<Null>	<Null>	0	<Null>	0	<Null>	0	<Null>	<Null>	<Null>	<Null>	<Null>	<Null>	<Null>	<Null>	<Null>	<Null>	<Null>	<Null>	Geological Survey of Canada - Pacific
663	663	Point	<Null>	<Null>	Canada West Coast	Canada West Coast_602	<Null>	<Null>	<Null>	0	<Null>	50.1836	-125.002	0	0	0	0	0	<Null>	0	0	0	0	0	<Null>	0	0	0	<Null>	<Null>	<Null>	0	<Null>	0	<Null>	0	<Null>	<Null>	<Null>	<Null>	<Null>	<Null>	<Null>	<Null>	<Null>	<Null>	<Null>	<Null>	Geological Survey of Canada - Pacific
664	664	Point	<Null>	<Null>	Canada West Coast	Canada West Coast_603	<Null>	<Null>	<Null>	0	<Null>	50.1704	-125	0	0	0	0	0	<Null>	0	0	0	0	0	<Null>	0	0	0	<Null>	<Null>	<Null>	0	<Null>	0	<Null>	0	<Null>	<Null>	<Null>	<Null>	<Null>	<Null>	<Null>	<Null>	<Null>	<Null>	<Null>	<Null>	Geological Survey of Canada - Pacific
665	665	Point	<Null>	<Null>	Canada West Coast	Canada West Coast_604	<Null>	<Null>	<Null>	0	<Null>	49.4317	-122.873	0	0	0	0	0	<Null>	0	0	0	0	0	<Null>	0	0	0	<Null>	<Null>	<Null>	0	<Null>	0	<Null>	0	<Null>	<Null>	<Null>	<Null>	<Null>	<Null>	<Null>	<Null>	<Null>	<Null>	<Null>	<Null>	Geological Survey of Canada - Pacific
666	666	Point	<Null>	<Null>	Canada West Coast	Canada West Coast_605	<Null>	<Null>	<Null>	0	<Null>	49.447	-122.877	0	0	0	0	0	<Null>	0	0	0	0	0	<Null>	0	0	0	<Null>	<Null>	<Null>	0	<Null>	0	<Null>	0	<Null>	<Null>	<Null>	<Null>	<Null>	<Null>	<Null>	<Null>	<Null>	<Null>	<Null>	<Null>	Geological Survey of Canada - Pacific
667	667	Point	<Null>	<Null>	Canada West Coast	Canada West Coast_606	<Null>	<Null>	<Null>	0	<Null>	49.3765	-122.871	0	0	0	0	0	<Null>	0	0	0	0	0	<Null>	0	0	0	<Null>	<Null>	<Null>	0	<Null>	0	<Null>	0	<Null>	<Null>	<Null>	<Null>	<Null>	<Null>	<Null>	<Null>	<Null>	<Null>	<Null>	<Null>	Geological Survey of Canada - Pacific
668	668	Point	<Null>	<Null>	Canada West Coast	Canada West Coast_607	<Null>	<Null>	<Null>	0	<Null>	49.3744	-122.873	0	0	0	0	0	<Null>	0	0	0	0	0	<Null>	0	0	0	<Null>	<Null>	<Null>	0	<Null>	0	<Null>	0	<Null>	<Null>	<Null>	<Null>	<Null>	<Null>	<Null>	<Null>	<Null>	<Null>	<Null>	<Null>	Geological Survey of Canada - Pacific
669	669	Point	<Null>	<Null>	Canada West Coast	Canada West Coast_608	<Null>	<Null>	<Null>	0	<Null>	49.3584	-122.897	0	0	0	0	0	<Null>	0	0	0	0	0	<Null>	0	0	0	<Null>	<Null>	<Null>	0	<Null>	0	<Null>	0	<Null>	<Null>	<Null>	<Null>	<Null>	<Null>	<Null>	<Null>	<Null>	<Null>	<Null>	<Null>	Geological Survey of Canada - Pacific
670	670	Point	<Null>	<Null>	Canada West Coast	Canada West Coast_609	<Null>	<Null>	<Null>	0	<Null>	50.1566	-123.846	0	0	0	0	0	<Null>	0	0	0	0	0	<Null>	0	0	0	<Null>	<Null>	<Null>	0	<Null>	0	<Null>	0	<Null>	<Null>	<Null>	<Null>	<Null>	<Null>	<Null>	<Null>	<Null>	<Null>	<Null>	<Null>	Geological Survey of Canada - Pacific
671	671	Point	<Null>	<Null>	Canada West Coast	Canada West Coast_610	<Null>	<Null>	<Null>	0	<Null>	48.4776	-124.343	0	0	0	0	0	<Null>	0	0	0	0	0	<Null>	0	0	0	<Null>	<Null>	<Null>	0	<Null>	0	<Null>	0	<Null>	<Null>	<Null>	<Null>	<Null>	<Null>	<Null>	<Null>	<Null>	<Null>	<Null>	<Null>	Geological Survey of Canada - Pacific
672	672	Point	<Null>	<Null>	Canada West Coast	Canada West Coast_611	<Null>	<Null>	<Null>	0	<Null>	48.6372	-123.528	0	0	0	0	0	<Null>	0	0	0	0	0	<Null>	0	0	0	<Null>	<Null>	<Null>	0	<Null>	0	<Null>	0	<Null>	<Null>	<Null>	<Null>	<Null>	<Null>	<Null>	<Null>	<Null>	<Null>	<Null>	<Null>	Geological Survey of Canada - Pacific
673	673	Point	<Null>	<Null>	Canada West Coast	Canada West Coast_612	<Null>	<Null>	<Null>	0	<Null>	50.1531	-123.839	0	0	0	0	0	<Null>	0	0	0	0	0	<Null>	0	0	0	<Null>	<Null>	<Null>	0	<Null>	0	<Null>	0	<Null>	<Null>	<Null>	<Null>	<Null>	<Null>	<Null>	<Null>	<Null>	<Null>	<Null>	<Null>	Geological Survey of Canada - Pacific
674	674	Point	<Null>	<Null>	Canada West Coast	Canada West Coast_613	<Null>	<Null>	<Null>	0	<Null>	50.1478	-123.829	0	0	0	0	0	<Null>	0	0	0	0	0	<Null>	0	0	0	<Null>	<Null>	<Null>	0	<Null>	0	<Null>	0	<Null>	<Null>	<Null>	<Null>	<Null>	<Null>	<Null>	<Null>	<Null>	<Null>	<Null>	<Null>	Geological Survey of Canada - Pacific
675	675	Point	<Null>	<Null>	Canada West Coast	Canada West Coast_614	<Null>	<Null>	<Null>	0	<Null>	50.198	-123.975	0	0	0	0	0	<Null>	0	0	0	0	0	<Null>	0	0	0	<Null>	<Null>	<Null>	0	<Null>	0	<Null>	0	<Null>	<Null>	<Null>	<Null>	<Null>	<Null>	<Null>	<Null>	<Null>	<Null>	<Null>	<Null>	Geological Survey of Canada - Pacific
676	676	Point	<Null>	<Null>	Canada West Coast	Canada West Coast_615	<Null>	<Null>	<Null>	0	<Null>	50.4302	-124.527	0	0	0	0	0	<Null>	0	0	0	0	0	<Null>	0	0	0	<Null>	<Null>	<Null>	0	<Null>	0	<Null>	0	<Null>	<Null>	<Null>	<Null>	<Null>	<Null>	<Null>	<Null>	<Null>	<Null>	<Null>	<Null>	Geological Survey of Canada - Pacific
677	677	Point	<Null>	<Null>	Canada West Coast	Canada West Coast_616	<Null>	<Null>	<Null>	0	<Null>	50.4206	-124.537	0	0	0	0	0	<Null>	0	0	0	0	0	<Null>	0	0	0	<Null>	<Null>	<Null>	0	<Null>	0	<Null>	0	<Null>	<Null>	<Null>	<Null>	<Null>	<Null>	<Null>	<Null>	<Null>	<Null>	<Null>	<Null>	Geological Survey of Canada - Pacific
678	678	Point	<Null>	<Null>	Canada West Coast	Canada West Coast_617	<Null>	<Null>	<Null>	0	<Null>	50.8216	-124.874	0	0	0	0	0	<Null>	0	0	0	0	0	<Null>	0	0	0	<Null>	<Null>	<Null>	0	<Null>	0	<Null>	0	<Null>	<Null>	<Null>	<Null>	<Null>	<Null>	<Null>	<Null>	<Null>	<Null>	<Null>	<Null>	Geological Survey of Canada - Pacific
679	679	Point	<Null>	<Null>	Canada West Coast	Canada West Coast_618	<Null>	<Null>	<Null>	0	<Null>	50.3649	-124.954	0	0	0	0	0	<Null>	0	0	0	0	0	<Null>	0	0	0	<Null>	<Null>	<Null>	0	<Null>	0	<Null>	0	<Null>	<Null>	<Null>	<Null>	<Null>	<Null>	<Null>	<Null>	<Null>	<Null>	<Null>	<Null>	Geological Survey of Canada - Pacific
680	680	Point	<Null>	<Null>	Canada West Coast	Canada West Coast_619	<Null>	<Null>	<Null>	0	<Null>	50.356	-124.963	0	0	0	0	0	<Null>	0	0	0	0	0	<Null>	0	0	0	<Null>	<Null>	<Null>	0	<Null>	0	<Null>	0	<Null>	<Null>	<Null>	<Null>	<Null>	<Null>	<Null>	<Null>	<Null>	<Null>	<Null>	<Null>	Geological Survey of Canada - Pacific
681	681	Point	<Null>	<Null>	Canada West Coast	Canada West Coast_620	<Null>	<Null>	<Null>	0	<Null>	50.0655	-124.85	0	0	0	0	0	<Null>	0	0	0	0	0	<Null>	0	0	0	<Null>	<Null>	<Null>	0	<Null>	0	<Null>	0	<Null>	<Null>	<Null>	<Null>	<Null>	<Null>	<Null>	<Null>	<Null>	<Null>	<Null>	<Null>	Geological Survey of Canada - Pacific
682	682	Point	<Null>	<Null>	Canada West Coast	Canada West Coast_621	<Null>	<Null>	<Null>	0	<Null>	50.0712	-124.827	0	0	0	0	0	<Null>	0	0	0	0	0	<Null>	0	0	0	<Null>	<Null>	<Null>	0	<Null>	0	<Null>	0	<Null>	<Null>	<Null>	<Null>	<Null>	<Null>	<Null>	<Null>	<Null>	<Null>	<Null>	<Null>	Geological Survey of Canada - Pacific
683	683	Point	<Null>	<Null>	Canada West Coast	Canada West Coast_622	<Null>	<Null>	<Null>	0	<Null>	49.7877	-124.032	0	0	0	0	0	<Null>	0	0	0	0	0	<Null>	0	0	0	<Null>	<Null>	<Null>	0	<Null>	0	<Null>	0	<Null>	<Null>	<Null>	<Null>	<Null>	<Null>	<Null>	<Null>	<Null>	<Null>	<Null>	<Null>	Geological Survey of Canada - Pacific
684	684	Point	<Null>	<Null>	Canada West Coast	Canada West Coast_623	<Null>	<Null>	<Null>	0	<Null>	49.8056	-123.998	0	0	0	0	0	<Null>	0	0	0	0	0	<Null>	0	0	0	<Null>	<Null>	<Null>	0	<Null>	0	<Null>	0	<Null>	<Null>	<Null>	<Null>	<Null>	<Null>	<Null>	<Null>	<Null>	<Null>	<Null>	<Null>	Geological Survey of Canada - Pacific
685	685	Point	<Null>	<Null>	Canada West Coast	Canada West Coast_624	<Null>	<Null>	<Null>	0	<Null>	49.6611	-124.303	0	0	0	0	0	<Null>	0	0	0	0	0	<Null>	0	0	0	<Null>	<Null>	<Null>	0	<Null>	0	<Null>	0	<Null>	<Null>	<Null>	<Null>	<Null>	<Null>	<Null>	<Null>	<Null>	<Null>	<Null>	<Null>	Geological Survey of Canada - Pacific
686	686	Point	<Null>	<Null>	Canada West Coast	Canada West Coast_625	<Null>	<Null>	<Null>	0	<Null>	49.8702	-124.068	0	0	0	0	0	<Null>	0	0	0	0	0	<Null>	0	0	0	<Null>	<Null>	<Null>	0	<Null>	0	<Null>	0	<Null>	<Null>	<Null>	<Null>	<Null>	<Null>	<Null>	<Null>	<Null>	<Null>	<Null>	<Null>	Geological Survey of Canada - Pacific
687	687	Point	<Null>	<Null>	Canada West Coast	Canada West Coast_626	<Null>	<Null>	<Null>	0	<Null>	49.3417	-124.261	0	0	0	0	0	<Null>	0	0	0	0	0	<Null>	0	0	0	<Null>	<Null>	<Null>	0	<Null>	0	<Null>	0	<Null>	<Null>	<Null>	<Null>	<Null>	<Null>	<Null>	<Null>	<Null>	<Null>	<Null>	<Null>	Geological Survey of Canada - Pacific
688	688	Point	<Null>	<Null>	Canada West Coast	Canada West Coast_627	<Null>	<Null>	<Null>	0	<Null>	49.3813	-124.408	0	0	0	0	0	<Null>	0	0	0	0	0	<Null>	0	0	0	<Null>	<Null>	<Null>	0	<Null>	0	<Null>	0	<Null>	<Null>	<Null>	<Null>	<Null>	<Null>	<Null>	<Null>	<Null>	<Null>	<Null>	<Null>	Geological Survey of Canada - Pacific
689	689	Point	<Null>	<Null>	Canada West Coast	Canada West Coast_628	<Null>	<Null>	<Null>	0	<Null>	49.3853	-124.441	0	0	0	0	0	<Null>	0	0	0	0	0	<Null>	0	0	0	<Null>	<Null>	<Null>	0	<Null>	0	<Null>	0	<Null>	<Null>	<Null>	<Null>	<Null>	<Null>	<Null>	<Null>	<Null>	<Null>	<Null>	<Null>	Geological Survey of Canada - Pacific
690	690	Point	<Null>	<Null>	Canada West Coast	Canada West Coast_629	<Null>	<Null>	<Null>	0	<Null>	49.4035	-124.373	0	0	0	0	0	<Null>	0	0	0	0	0	<Null>	0	0	0	<Null>	<Null>	<Null>	0	<Null>	0	<Null>	0	<Null>	<Null>	<Null>	<Null>	<Null>	<Null>	<Null>	<Null>	<Null>	<Null>	<Null>	<Null>	Geological Survey of Canada - Pacific
691	691	Point	<Null>	<Null>	Canada West Coast	Canada West Coast_630	<Null>	<Null>	<Null>	0	<Null>	49.0788	-125.166	0	0	0	0	0	<Null>	0	0	0	0	0	<Null>	0	0	0	<Null>	<Null>	<Null>	0	<Null>	0	<Null>	0	<Null>	<Null>	<Null>	<Null>	<Null>	<Null>	<Null>	<Null>	<Null>	<Null>	<Null>	<Null>	Geological Survey of Canada - Pacific
692	692	Point	<Null>	<Null>	Canada West Coast	Canada West Coast_631	<Null>	<Null>	<Null>	0	<Null>	49.0717	-125.155	0	0	0	0	0	<Null>	0	0	0	0	0	<Null>	0	0	0	<Null>	<Null>	<Null>	0	<Null>	0	<Null>	0	<Null>	<Null>	<Null>	<Null>	<Null>	<Null>	<Null>	<Null>	<Null>	<Null>	<Null>	<Null>	Geological Survey of Canada - Pacific
693	693	Point	<Null>	<Null>	Canada West Coast	Canada West Coast_632	<Null>	<Null>	<Null>	0	<Null>	49.1005	-124.821	0	0	0	0	0	<Null>	0	0	0	0	0	<Null>	0	0	0	<Null>	<Null>	<Null>	0	<Null>	0	<Null>	0	<Null>	<Null>	<Null>	<Null>	<Null>	<Null>	<Null>	<Null>	<Null>	<Null>	<Null>	<Null>	Geological Survey of Canada - Pacific
694	694	Point	<Null>	<Null>	Canada West Coast	Canada West Coast_633	<Null>	<Null>	<Null>	0	<Null>	50.4365	-124.98	0	0	0	0	0	<Null>	0	0	0	0	0	<Null>	0	0	0	<Null>	<Null>	<Null>	0	<Null>	0	<Null>	0	<Null>	<Null>	<Null>	<Null>	<Null>	<Null>	<Null>	<Null>	<Null>	<Null>	<Null>	<Null>	Geological Survey of Canada - Pacific
695	695	Point	<Null>	<Null>	Canada West Coast	Canada West Coast_634	<Null>	<Null>	<Null>	0	<Null>	50.4432	-125.009	0	0	0	0	0	<Null>	0	0	0	0	0	<Null>	0	0	0	<Null>	<Null>	<Null>	0	<Null>	0	<Null>	0	<Null>	<Null>	<Null>	<Null>	<Null>	<Null>	<Null>	<Null>	<Null>	<Null>	<Null>	<Null>	Geological Survey of Canada - Pacific
696	696	Point	<Null>	<Null>	Canada West Coast	Canada West Coast_635	<Null>	<Null>	<Null>	0	<Null>	50.3992	-124.96	0	0	0	0	0	<Null>	0	0	0	0	0	<Null>	0	0	0	<Null>	<Null>	<Null>	0	<Null>	0	<Null>	0	<Null>	<Null>	<Null>	<Null>	<Null>	<Null>	<Null>	<Null>	<Null>	<Null>	<Null>	<Null>	Geological Survey of Canada - Pacific
697	697	Point	<Null>	<Null>	Canada West Coast	Canada West Coast_636	<Null>	<Null>	<Null>	0	<Null>	50.861	-124.865	0	0	0	0	0	<Null>	0	0	0	0	0	<Null>	0	0	0	<Null>	<Null>	<Null>	0	<Null>	0	<Null>	0	<Null>	<Null>	<Null>	<Null>	<Null>	<Null>	<Null>	<Null>	<Null>	<Null>	<Null>	<Null>	Geological Survey of Canada - Pacific
698	698	Point	<Null>	<Null>	Canada West Coast	Canada West Coast_637	<Null>	<Null>	<Null>	0	<Null>	49.0955	-124.831	0	0	0	0	0	<Null>	0	0	0	0	0	<Null>	0	0	0	<Null>	<Null>	<Null>	0	<Null>	0	<Null>	0	<Null>	<Null>	<Null>	<Null>	<Null>	<Null>	<Null>	<Null>	<Null>	<Null>	<Null>	<Null>	Geological Survey of Canada - Pacific
699	699	Point	<Null>	<Null>	Canada West Coast	Canada West Coast_638	<Null>	<Null>	<Null>	0	<Null>	53.9166	-128.73	0	0	0	0	0	<Null>	0	0	0	0	0	<Null>	0	0	0	<Null>	<Null>	<Null>	0	<Null>	0	<Null>	0	<Null>	<Null>	<Null>	<Null>	<Null>	<Null>	<Null>	<Null>	Fjord Seascape - Deltas	<Null>	<Null>	<Null>	Geological Survey of Canada - Pacific
700	700	Point	<Null>	<Null>	Canada West Coast	Canada West Coast_639	<Null>	<Null>	<Null>	0	<Null>	53.693	-129.13	0	0	0	0	0	<Null>	0	0	0	0	0	<Null>	0	0	0	<Null>	<Null>	<Null>	0	<Null>	0	<Null>	0	<Null>	<Null>	<Null>	<Null>	<Null>	<Null>	<Null>	<Null>	Fjord Seascape - Deltas	<Null>	<Null>	<Null>	Geological Survey of Canada - Pacific
714	701	Point	<Null>	<Null>	Canada West Coast	Canada West Coast_640	Douglas Channel Slide A	<Null>	<Null>	0	<Null>	53.4979	-129.186	60	350	0	0	0	<Null>	0	0	0	0	0	<Null>	0	0	0	<Null>	<Null>	<Null>	0	<Null>	0	<Null>	0	<Null>	<Null>	<Null>	0.032	Estimated volume is approximate -do not include buried debris spreading into the fiord after initial block sliding.	Mid-Holocene (5000 to 10,000 years BP)	<Null>	Episodically active creeping slide between 13 ka BP and 11.5 ka BP. Estimate constrained to to less than 14000 yrs BP (after deglaciation), but based on evidence of sediment drape/cover, presence of smaller landslides within the sediment drape and erodin	Fjord Seascape - Bedrock creep	Multibeam bathymetry Kongsberg SIS systems Simrad EM2002 and EM710; high-resolution seismic Sparker data and Chirp data with Benthos piston coring	Data collected in water depth greater than 50 meters in 2009 using a hull-mounted Kongsberg-Simrad EM002 and the Kongsberg-Simrad EM 710 at 70-100 kHz in 2010 and inshore deeper than 5 meters using EM3002 multibeam systems; High resolution 220 line km Spa	Canadian Coast Guard Ship (CCGS) Vector cruises in Kitimat Arm and Douglas channel between 2007 and 2010, and on CCGS John P. Tully in November 2013 and October 2014	Geological Survey of Canada - Pacific
715	702	Point	<Null>	<Null>	Canada West Coast	Canada West Coast_641	<Null>	<Null>	<Null>	0	<Null>	53.456	-129.185	0	0	0	0	0	<Null>	0	0	0	0	0	<Null>	0	0	0	<Null>	<Null>	<Null>	0	<Null>	0	<Null>	0	<Null>	<Null>	<Null>	<Null>	<Null>	<Null>	<Null>	<Null>	Fjord Seascape - Unconsolidated sidewall	<Null>	<Null>	<Null>	Geological Survey of Canada - Pacific
716	703	Point	<Null>	<Null>	Canada West Coast	Canada West Coast_642	<Null>	<Null>	<Null>	0	<Null>	53.516	-129.184	0	0	0	0	0	<Null>	0	0	0	0	0	<Null>	0	0	0	<Null>	<Null>	<Null>	0	<Null>	0	<Null>	0	<Null>	<Null>	<Null>	<Null>	<Null>	<Null>	<Null>	<Null>	Fjord Seascape - Unconsolidated sidewall	<Null>	<Null>	<Null>	Geological Survey of Canada - Pacific
717	704	Point	<Null>	<Null>	Canada West Coast	Canada West Coast_643	<Null>	<Null>	<Null>	0	<Null>	53.5421	-129.177	0	0	0	0	0	<Null>	0	0	0	0	0	<Null>	0	0	0	<Null>	<Null>	<Null>	0	<Null>	0	<Null>	0	<Null>	<Null>	<Null>	<Null>	<Null>	<Null>	<Null>	<Null>	Fjord Seascape - Deltas	<Null>	<Null>	<Null>	Geological Survey of Canada - Pacific
718	705	Point	<Null>	<Null>	Canada West Coast	Canada West Coast_644	<Null>	<Null>	<Null>	0	<Null>	53.5508	-129.177	0	0	0	0	0	<Null>	0	0	0	0	0	<Null>	0	0	0	<Null>	<Null>	<Null>	0	<Null>	0	<Null>	0	<Null>	<Null>	<Null>	<Null>	<Null>	<Null>	<Null>	<Null>	Fjord Seascape - Deltas	<Null>	<Null>	<Null>	Geological Survey of Canada - Pacific
719	706	Point	<Null>	<Null>	Canada West Coast	Canada West Coast_645	<Null>	<Null>	<Null>	0	<Null>	53.5885	-129.242	0	0	0	0	0	<Null>	0	0	0	0	0	<Null>	0	0	0	<Null>	<Null>	<Null>	0	<Null>	0	<Null>	0	<Null>	<Null>	<Null>	<Null>	<Null>	<Null>	<Null>	<Null>	Fjord Seascape - Debris flows	<Null>	<Null>	<Null>	Geological Survey of Canada - Pacific
720	707	Point	<Null>	<Null>	Canada West Coast	Canada West Coast_646	<Null>	<Null>	<Null>	0	<Null>	53.5366	-129.232	0	0	0	0	0	<Null>	0	0	0	0	0	<Null>	0	0	0	<Null>	<Null>	<Null>	0	<Null>	0	<Null>	0	<Null>	<Null>	<Null>	<Null>	<Null>	<Null>	<Null>	<Null>	Fjord Seascape - Postglacial Mud	<Null>	<Null>	<Null>	Geological Survey of Canada - Pacific
721	708	Point	<Null>	<Null>	Canada West Coast	Canada West Coast_647	<Null>	<Null>	<Null>	0	<Null>	53.5636	-129.231	0	0	0	0	0	<Null>	0	0	0	0	0	<Null>	0	0	0	<Null>	<Null>	<Null>	0	<Null>	0	<Null>	0	<Null>	<Null>	<Null>	<Null>	<Null>	<Null>	<Null>	<Null>	Fjord Seascape - Moraines	<Null>	<Null>	<Null>	Geological Survey of Canada - Pacific
722	709	Point	<Null>	<Null>	Canada West Coast	Canada West Coast_648	<Null>	<Null>	<Null>	0	<Null>	53.4894	-129.234	0	0	0	0	0	<Null>	0	0	0	0	0	<Null>	0	0	0	<Null>	<Null>	<Null>	0	<Null>	0	<Null>	0	<Null>	<Null>	<Null>	<Null>	<Null>	<Null>	<Null>	<Null>	Fjord Seascape - Postglacial Mud	<Null>	<Null>	<Null>	Geological Survey of Canada - Pacific
723	710	Point	<Null>	<Null>	Canada West Coast	Canada West Coast_649	<Null>	<Null>	<Null>	0	<Null>	53.4627	-129.222	0	0	0	0	0	<Null>	0	0	0	0	0	<Null>	0	0	0	<Null>	<Null>	<Null>	0	<Null>	0	<Null>	0	<Null>	<Null>	<Null>	<Null>	<Null>	<Null>	<Null>	<Null>	Fjord Seascape - Postglacial Mud	<Null>	<Null>	<Null>	Geological Survey of Canada - Pacific
724	711	Point	<Null>	<Null>	Canada West Coast	Canada West Coast_650	<Null>	<Null>	<Null>	0	<Null>	53.5288	-129.176	0	0	0	0	0	<Null>	0	0	0	0	0	<Null>	0	0	0	<Null>	<Null>	<Null>	0	<Null>	0	<Null>	0	<Null>	<Null>	<Null>	<Null>	<Null>	<Null>	<Null>	<Null>	Fjord Seascape - Unconsolidated sidewall	<Null>	<Null>	<Null>	Geological Survey of Canada - Pacific
725	712	Point	<Null>	<Null>	Canada West Coast	Canada West Coast_651	<Null>	<Null>	<Null>	0	<Null>	53.5314	-129.175	0	0	0	0	0	<Null>	0	0	0	0	0	<Null>	0	0	0	<Null>	<Null>	<Null>	0	<Null>	0	<Null>	0	<Null>	<Null>	<Null>	<Null>	<Null>	<Null>	<Null>	<Null>	Fjord Seascape - Unconsolidated sidewall	<Null>	<Null>	<Null>	Geological Survey of Canada - Pacific
726	713	Point	<Null>	<Null>	Canada West Coast	Canada West Coast_652	<Null>	<Null>	<Null>	0	<Null>	53.5352	-129.175	0	0	0	0	0	<Null>	0	0	0	0	0	<Null>	0	0	0	<Null>	<Null>	<Null>	0	<Null>	0	<Null>	0	<Null>	<Null>	<Null>	<Null>	<Null>	<Null>	<Null>	<Null>	Fjord Seascape - Unconsolidated sidewall	<Null>	<Null>	<Null>	Geological Survey of Canada - Pacific
727	714	Point	<Null>	<Null>	Canada West Coast	Canada West Coast_653	<Null>	<Null>	<Null>	0	<Null>	53.5246	-129.177	0	0	0	0	0	<Null>	0	0	0	0	0	<Null>	0	0	0	<Null>	<Null>	<Null>	0	<Null>	0	<Null>	0	<Null>	<Null>	<Null>	<Null>	<Null>	<Null>	<Null>	<Null>	Fjord Seascape - Unconsolidated sidewall	<Null>	<Null>	<Null>	Geological Survey of Canada - Pacific
728	715	Point	<Null>	<Null>	Canada West Coast	Canada West Coast_654	<Null>	<Null>	<Null>	0	<Null>	53.5405	-129.175	0	0	0	0	0	<Null>	0	0	0	0	0	<Null>	0	0	0	<Null>	<Null>	<Null>	0	<Null>	0	<Null>	0	<Null>	<Null>	<Null>	<Null>	<Null>	<Null>	<Null>	<Null>	Fjord Seascape - Unconsolidated sidewall	<Null>	<Null>	<Null>	Geological Survey of Canada - Pacific
729	716	Point	<Null>	<Null>	Canada West Coast	Canada West Coast_655	<Null>	<Null>	<Null>	0	<Null>	53.808	-128.885	0	0	0	0	0	<Null>	0	0	0	0	0	<Null>	0	0	0	<Null>	<Null>	<Null>	0	<Null>	0	<Null>	0	<Null>	<Null>	<Null>	<Null>	<Null>	<Null>	<Null>	<Null>	Fjord Seascape - Postglacial Mud	<Null>	<Null>	<Null>	Geological Survey of Canada - Pacific
730	717	Point	<Null>	<Null>	Canada West Coast	Canada West Coast_656	<Null>	<Null>	<Null>	0	<Null>	53.7161	-128.806	0	0	0	0	0	<Null>	0	0	0	0	0	<Null>	0	0	0	<Null>	<Null>	<Null>	0	<Null>	0	<Null>	0	<Null>	<Null>	<Null>	<Null>	<Null>	<Null>	<Null>	<Null>	Fjord Seascape - Debris flows	<Null>	<Null>	<Null>	Geological Survey of Canada - Pacific
731	718	Point	<Null>	<Null>	Canada West Coast	Canada West Coast_657	<Null>	<Null>	<Null>	0	<Null>	53.695	-128.804	0	0	0	0	0	<Null>	0	0	0	0	0	<Null>	0	0	0	<Null>	<Null>	<Null>	0	<Null>	0	<Null>	0	<Null>	<Null>	<Null>	<Null>	<Null>	<Null>	<Null>	<Null>	Fjord Seascape - Deltas	<Null>	<Null>	<Null>	Geological Survey of Canada - Pacific
732	719	Point	<Null>	<Null>	Canada West Coast	Canada West Coast_658	<Null>	<Null>	<Null>	0	<Null>	53.6775	-128.819	0	0	0	0	0	<Null>	0	0	0	0	0	<Null>	0	0	0	<Null>	<Null>	<Null>	0	<Null>	0	<Null>	0	<Null>	<Null>	<Null>	<Null>	<Null>	<Null>	<Null>	<Null>	Fjord Seascape - Deltas	<Null>	<Null>	<Null>	Geological Survey of Canada - Pacific
733	720	Point	<Null>	<Null>	Canada West Coast	Canada West Coast_659	<Null>	<Null>	<Null>	0	<Null>	53.6556	-129.188	0	0	0	0	0	<Null>	0	0	0	0	0	<Null>	0	0	0	<Null>	<Null>	<Null>	0	<Null>	0	<Null>	0	<Null>	<Null>	<Null>	<Null>	<Null>	<Null>	<Null>	<Null>	Fjord Seascape - Deltas	<Null>	<Null>	<Null>	Geological Survey of Canada - Pacific
734	721	Point	<Null>	<Null>	Canada West Coast	Canada West Coast_660	<Null>	<Null>	<Null>	0	<Null>	50.8793	-125.656	0	0	0	0	0	<Null>	0	0	0	0	0	<Null>	0	0	0	<Null>	<Null>	<Null>	0	<Null>	0	<Null>	0	<Null>	<Null>	<Null>	<Null>	<Null>	<Null>	<Null>	<Null>	<Null>	<Null>	<Null>	<Null>	Geological Survey of Canada - Pacific
735	722	Point	<Null>	<Null>	Canada West Coast	Canada West Coast_661	<Null>	<Null>	<Null>	0	<Null>	50.8998	-125.617	0	0	0	0	0	<Null>	0	0	0	0	0	<Null>	0	0	0	<Null>	<Null>	<Null>	0	<Null>	0	<Null>	0	<Null>	<Null>	<Null>	<Null>	<Null>	<Null>	<Null>	<Null>	<Null>	<Null>	<Null>	<Null>	Geological Survey of Canada - Pacific
736	723	Point	<Null>	<Null>	Canada West Coast	Canada West Coast_662	<Null>	<Null>	<Null>	0	<Null>	50.9029	-125.607	0	0	0	0	0	<Null>	0	0	0	0	0	<Null>	0	0	0	<Null>	<Null>	<Null>	0	<Null>	0	<Null>	0	<Null>	<Null>	<Null>	<Null>	<Null>	<Null>	<Null>	<Null>	<Null>	<Null>	<Null>	<Null>	Geological Survey of Canada - Pacific
737	724	Point	<Null>	<Null>	Canada West Coast	Canada West Coast_663	<Null>	<Null>	<Null>	0	<Null>	50.8969	-125.631	0	0	0	0	0	<Null>	0	0	0	0	0	<Null>	0	0	0	<Null>	<Null>	<Null>	0	<Null>	0	<Null>	0	<Null>	<Null>	<Null>	<Null>	<Null>	<Null>	<Null>	<Null>	<Null>	<Null>	<Null>	<Null>	Geological Survey of Canada - Pacific
738	725	Point	<Null>	<Null>	Canada West Coast	Canada West Coast_664	<Null>	<Null>	<Null>	0	<Null>	50.8855	-125.628	0	0	0	0	0	<Null>	0	0	0	0	0	<Null>	0	0	0	<Null>	<Null>	<Null>	0	<Null>	0	<Null>	0	<Null>	<Null>	<Null>	<Null>	<Null>	<Null>	<Null>	<Null>	<Null>	<Null>	<Null>	<Null>	Geological Survey of Canada - Pacific
739	726	Point	<Null>	<Null>	Canada West Coast	Canada West Coast_665	<Null>	<Null>	<Null>	0	<Null>	50.9889	-125.54	0	0	0	0	0	<Null>	0	0	0	0	0	<Null>	0	0	0	<Null>	<Null>	<Null>	0	<Null>	0	<Null>	0	<Null>	<Null>	<Null>	<Null>	<Null>	<Null>	<Null>	<Null>	<Null>	<Null>	<Null>	<Null>	Geological Survey of Canada - Pacific
740	727	Point	<Null>	<Null>	Canada West Coast	Canada West Coast_666	<Null>	<Null>	<Null>	0	<Null>	50.9497	-125.508	0	0	0	0	0	<Null>	0	0	0	0	0	<Null>	0	0	0	<Null>	<Null>	<Null>	0	<Null>	0	<Null>	0	<Null>	<Null>	<Null>	<Null>	<Null>	<Null>	<Null>	<Null>	<Null>	<Null>	<Null>	<Null>	Geological Survey of Canada - Pacific
741	728	Point	<Null>	<Null>	Canada West Coast	Canada West Coast_667	<Null>	<Null>	<Null>	0	<Null>	50.9406	-125.505	0	0	0	0	0	<Null>	0	0	0	0	0	<Null>	0	0	0	<Null>	<Null>	<Null>	0	<Null>	0	<Null>	0	<Null>	<Null>	<Null>	<Null>	<Null>	<Null>	<Null>	<Null>	<Null>	<Null>	<Null>	<Null>	Geological Survey of Canada - Pacific
742	729	Point	<Null>	<Null>	Canada West Coast	Canada West Coast_668	<Null>	<Null>	<Null>	0	<Null>	51.0185	-125.579	0	0	0	0	0	<Null>	0	0	0	0	0	<Null>	0	0	0	<Null>	<Null>	<Null>	0	<Null>	0	<Null>	0	<Null>	<Null>	<Null>	<Null>	<Null>	<Null>	<Null>	<Null>	<Null>	<Null>	<Null>	<Null>	Geological Survey of Canada - Pacific
743	730	Point	<Null>	<Null>	Canada West Coast	Canada West Coast_669	<Null>	<Null>	<Null>	0	<Null>	50.9694	-125.583	0	0	0	0	0	<Null>	0	0	0	0	0	<Null>	0	0	0	<Null>	<Null>	<Null>	0	<Null>	0	<Null>	0	<Null>	<Null>	<Null>	<Null>	<Null>	<Null>	<Null>	<Null>	<Null>	<Null>	<Null>	<Null>	Geological Survey of Canada - Pacific
744	731	Point	<Null>	<Null>	Canada West Coast	Canada West Coast_670	<Null>	<Null>	<Null>	0	<Null>	50.9601	-125.576	0	0	0	0	0	<Null>	0	0	0	0	0	<Null>	0	0	0	<Null>	<Null>	<Null>	0	<Null>	0	<Null>	0	<Null>	<Null>	<Null>	<Null>	<Null>	<Null>	<Null>	<Null>	<Null>	<Null>	<Null>	<Null>	Geological Survey of Canada - Pacific
745	732	Point	<Null>	<Null>	Canada West Coast	Canada West Coast_671	<Null>	<Null>	<Null>	0	<Null>	50.9557	-125.57	0	0	0	0	0	<Null>	0	0	0	0	0	<Null>	0	0	0	<Null>	<Null>	<Null>	0	<Null>	0	<Null>	0	<Null>	<Null>	<Null>	<Null>	<Null>	<Null>	<Null>	<Null>	<Null>	<Null>	<Null>	<Null>	Geological Survey of Canada - Pacific
746	733	Point	<Null>	<Null>	Canada West Coast	Canada West Coast_672	<Null>	<Null>	<Null>	0	<Null>	50.9553	-125.566	0	0	0	0	0	<Null>	0	0	0	0	0	<Null>	0	0	0	<Null>	<Null>	<Null>	0	<Null>	0	<Null>	0	<Null>	<Null>	<Null>	<Null>	<Null>	<Null>	<Null>	<Null>	<Null>	<Null>	<Null>	<Null>	Geological Survey of Canada - Pacific
747	734	Point	<Null>	<Null>	Canada West Coast	Canada West Coast_673	<Null>	<Null>	<Null>	0	<Null>	50.9623	-125.579	0	0	0	0	0	<Null>	0	0	0	0	0	<Null>	0	0	0	<Null>	<Null>	<Null>	0	<Null>	0	<Null>	0	<Null>	<Null>	<Null>	<Null>	<Null>	<Null>	<Null>	<Null>	<Null>	<Null>	<Null>	<Null>	Geological Survey of Canada - Pacific
748	735	Point	<Null>	<Null>	Canada West Coast	Canada West Coast_674	<Null>	<Null>	<Null>	0	<Null>	50.9313	-125.511	0	0	0	0	0	<Null>	0	0	0	0	0	<Null>	0	0	0	<Null>	<Null>	<Null>	0	<Null>	0	<Null>	0	<Null>	<Null>	<Null>	<Null>	<Null>	<Null>	<Null>	<Null>	<Null>	<Null>	<Null>	<Null>	Geological Survey of Canada - Pacific
749	736	Point	<Null>	<Null>	Canada West Coast	Canada West Coast_675	<Null>	<Null>	<Null>	0	<Null>	50.9332	-125.508	0	0	0	0	0	<Null>	0	0	0	0	0	<Null>	0	0	0	<Null>	<Null>	<Null>	0	<Null>	0	<Null>	0	<Null>	<Null>	<Null>	<Null>	<Null>	<Null>	<Null>	<Null>	<Null>	<Null>	<Null>	<Null>	Geological Survey of Canada - Pacific
750	737	Point	<Null>	<Null>	Canada West Coast	Canada West Coast_676	<Null>	<Null>	<Null>	0	<Null>	50.8711	-125.571	0	0	0	0	0	<Null>	0	0	0	0	0	<Null>	0	0	0	<Null>	<Null>	<Null>	0	<Null>	0	<Null>	0	<Null>	<Null>	<Null>	<Null>	<Null>	<Null>	<Null>	<Null>	<Null>	<Null>	<Null>	<Null>	Geological Survey of Canada - Pacific
751	738	Point	<Null>	<Null>	Canada West Coast	Canada West Coast_677	<Null>	<Null>	<Null>	0	<Null>	50.8752	-125.56	0	0	0	0	0	<Null>	0	0	0	0	0	<Null>	0	0	0	<Null>	<Null>	<Null>	0	<Null>	0	<Null>	0	<Null>	<Null>	<Null>	<Null>	<Null>	<Null>	<Null>	<Null>	<Null>	<Null>	<Null>	<Null>	Geological Survey of Canada - Pacific
752	739	Point	<Null>	<Null>	Canada West Coast	Canada West Coast_678	<Null>	<Null>	<Null>	0	<Null>	50.8782	-125.547	0	0	0	0	0	<Null>	0	0	0	0	0	<Null>	0	0	0	<Null>	<Null>	<Null>	0	<Null>	0	<Null>	0	<Null>	<Null>	<Null>	<Null>	<Null>	<Null>	<Null>	<Null>	<Null>	<Null>	<Null>	<Null>	Geological Survey of Canada - Pacific
753	740	Point	<Null>	<Null>	Canada West Coast	Canada West Coast_679	<Null>	<Null>	<Null>	0	<Null>	50.8687	-125.625	0	0	0	0	0	<Null>	0	0	0	0	0	<Null>	0	0	0	<Null>	<Null>	<Null>	0	<Null>	0	<Null>	0	<Null>	<Null>	<Null>	<Null>	<Null>	<Null>	<Null>	<Null>	<Null>	<Null>	<Null>	<Null>	Geological Survey of Canada - Pacific
754	741	Point	<Null>	<Null>	Canada West Coast	Canada West Coast_680	<Null>	<Null>	<Null>	0	<Null>	50.8133	-125.617	0	0	0	0	0	<Null>	0	0	0	0	0	<Null>	0	0	0	<Null>	<Null>	<Null>	0	<Null>	0	<Null>	0	<Null>	<Null>	<Null>	<Null>	<Null>	<Null>	<Null>	<Null>	<Null>	<Null>	<Null>	<Null>	Geological Survey of Canada - Pacific
755	742	Point	<Null>	<Null>	Canada West Coast	Canada West Coast_681	<Null>	<Null>	<Null>	0	<Null>	50.8275	-125.64	0	0	0	0	0	<Null>	0	0	0	0	0	<Null>	0	0	0	<Null>	<Null>	<Null>	0	<Null>	0	<Null>	0	<Null>	<Null>	<Null>	<Null>	<Null>	<Null>	<Null>	<Null>	<Null>	<Null>	<Null>	<Null>	Geological Survey of Canada - Pacific
756	743	Point	<Null>	<Null>	Canada West Coast	Canada West Coast_682	<Null>	<Null>	<Null>	0	<Null>	50.7957	-125.599	0	0	0	0	0	<Null>	0	0	0	0	0	<Null>	0	0	0	<Null>	<Null>	<Null>	0	<Null>	0	<Null>	0	<Null>	<Null>	<Null>	<Null>	<Null>	<Null>	<Null>	<Null>	<Null>	<Null>	<Null>	<Null>	Geological Survey of Canada - Pacific
757	744	Point	<Null>	<Null>	Canada West Coast	Canada West Coast_683	<Null>	<Null>	<Null>	0	<Null>	50.7841	-125.608	0	0	0	0	0	<Null>	0	0	0	0	0	<Null>	0	0	0	<Null>	<Null>	<Null>	0	<Null>	0	<Null>	0	<Null>	<Null>	<Null>	<Null>	<Null>	<Null>	<Null>	<Null>	<Null>	<Null>	<Null>	<Null>	Geological Survey of Canada - Pacific
758	745	Point	<Null>	<Null>	Canada West Coast	Canada West Coast_684	<Null>	<Null>	<Null>	0	<Null>	50.7599	-125.621	0	0	0	0	0	<Null>	0	0	0	0	0	<Null>	0	0	0	<Null>	<Null>	<Null>	0	<Null>	0	<Null>	0	<Null>	<Null>	<Null>	<Null>	<Null>	<Null>	<Null>	<Null>	<Null>	<Null>	<Null>	<Null>	Geological Survey of Canada - Pacific
759	746	Point	<Null>	<Null>	Canada West Coast	Canada West Coast_685	<Null>	<Null>	<Null>	0	<Null>	50.7647	-125.617	0	0	0	0	0	<Null>	0	0	0	0	0	<Null>	0	0	0	<Null>	<Null>	<Null>	0	<Null>	0	<Null>	0	<Null>	<Null>	<Null>	<Null>	<Null>	<Null>	<Null>	<Null>	<Null>	<Null>	<Null>	<Null>	Geological Survey of Canada - Pacific
760	747	Point	<Null>	<Null>	Canada West Coast	Canada West Coast_686	<Null>	<Null>	<Null>	0	<Null>	50.7563	-125.64	0	0	0	0	0	<Null>	0	0	0	0	0	<Null>	0	0	0	<Null>	<Null>	<Null>	0	<Null>	0	<Null>	0	<Null>	<Null>	<Null>	<Null>	<Null>	<Null>	<Null>	<Null>	<Null>	<Null>	<Null>	<Null>	Geological Survey of Canada - Pacific
761	748	Point	<Null>	<Null>	Canada West Coast	Canada West Coast_687	<Null>	<Null>	<Null>	0	<Null>	50.7727	-125.682	0	0	0	0	0	<Null>	0	0	0	0	0	<Null>	0	0	0	<Null>	<Null>	<Null>	0	<Null>	0	<Null>	0	<Null>	<Null>	<Null>	<Null>	<Null>	<Null>	<Null>	<Null>	<Null>	<Null>	<Null>	<Null>	Geological Survey of Canada - Pacific
762	749	Point	<Null>	<Null>	Canada West Coast	Canada West Coast_688	<Null>	<Null>	<Null>	0	<Null>	50.7625	-125.698	0	0	0	0	0	<Null>	0	0	0	0	0	<Null>	0	0	0	<Null>	<Null>	<Null>	0	<Null>	0	<Null>	0	<Null>	<Null>	<Null>	<Null>	<Null>	<Null>	<Null>	<Null>	<Null>	<Null>	<Null>	<Null>	Geological Survey of Canada - Pacific
763	750	Point	<Null>	<Null>	Canada West Coast	Canada West Coast_689	<Null>	<Null>	<Null>	0	<Null>	50.7433	-125.677	0	0	0	0	0	<Null>	0	0	0	0	0	<Null>	0	0	0	<Null>	<Null>	<Null>	0	<Null>	0	<Null>	0	<Null>	<Null>	<Null>	<Null>	<Null>	<Null>	<Null>	<Null>	<Null>	<Null>	<Null>	<Null>	Geological Survey of Canada - Pacific
764	751	Point	<Null>	<Null>	Canada West Coast	Canada West Coast_690	<Null>	<Null>	<Null>	0	<Null>	50.7449	-125.713	0	0	0	0	0	<Null>	0	0	0	0	0	<Null>	0	0	0	<Null>	<Null>	<Null>	0	<Null>	0	<Null>	0	<Null>	<Null>	<Null>	<Null>	<Null>	<Null>	<Null>	<Null>	<Null>	<Null>	<Null>	<Null>	Geological Survey of Canada - Pacific
765	752	Point	<Null>	<Null>	Canada West Coast	Canada West Coast_691	<Null>	<Null>	<Null>	0	<Null>	50.7398	-125.712	0	0	0	0	0	<Null>	0	0	0	0	0	<Null>	0	0	0	<Null>	<Null>	<Null>	0	<Null>	0	<Null>	0	<Null>	<Null>	<Null>	<Null>	<Null>	<Null>	<Null>	<Null>	<Null>	<Null>	<Null>	<Null>	Geological Survey of Canada - Pacific
766	753	Point	<Null>	<Null>	Canada West Coast	Canada West Coast_692	<Null>	<Null>	<Null>	0	<Null>	50.7228	-125.686	0	0	0	0	0	<Null>	0	0	0	0	0	<Null>	0	0	0	<Null>	<Null>	<Null>	0	<Null>	0	<Null>	0	<Null>	<Null>	<Null>	<Null>	<Null>	<Null>	<Null>	<Null>	<Null>	<Null>	<Null>	<Null>	Geological Survey of Canada - Pacific
767	754	Point	<Null>	<Null>	Canada West Coast	Canada West Coast_693	<Null>	<Null>	<Null>	0	<Null>	50.7263	-125.685	0	0	0	0	0	<Null>	0	0	0	0	0	<Null>	0	0	0	<Null>	<Null>	<Null>	0	<Null>	0	<Null>	0	<Null>	<Null>	<Null>	<Null>	<Null>	<Null>	<Null>	<Null>	<Null>	<Null>	<Null>	<Null>	Geological Survey of Canada - Pacific
768	755	Point	<Null>	<Null>	Canada West Coast	Canada West Coast_694	<Null>	<Null>	<Null>	0	<Null>	50.7292	-125.688	0	0	0	0	0	<Null>	0	0	0	0	0	<Null>	0	0	0	<Null>	<Null>	<Null>	0	<Null>	0	<Null>	0	<Null>	<Null>	<Null>	<Null>	<Null>	<Null>	<Null>	<Null>	<Null>	<Null>	<Null>	<Null>	Geological Survey of Canada - Pacific
769	756	Point	<Null>	<Null>	Canada West Coast	Canada West Coast_695	<Null>	<Null>	<Null>	0	<Null>	50.6945	-125.704	0	0	0	0	0	<Null>	0	0	0	0	0	<Null>	0	0	0	<Null>	<Null>	<Null>	0	<Null>	0	<Null>	0	<Null>	<Null>	<Null>	<Null>	<Null>	<Null>	<Null>	<Null>	<Null>	<Null>	<Null>	<Null>	Geological Survey of Canada - Pacific
770	757	Point	<Null>	<Null>	Canada West Coast	Canada West Coast_696	<Null>	<Null>	<Null>	0	<Null>	50.7059	-125.704	0	0	0	0	0	<Null>	0	0	0	0	0	<Null>	0	0	0	<Null>	<Null>	<Null>	0	<Null>	0	<Null>	0	<Null>	<Null>	<Null>	<Null>	<Null>	<Null>	<Null>	<Null>	<Null>	<Null>	<Null>	<Null>	Geological Survey of Canada - Pacific
771	758	Point	<Null>	<Null>	Canada West Coast	Canada West Coast_697	<Null>	<Null>	<Null>	0	<Null>	50.6995	-125.823	0	0	0	0	0	<Null>	0	0	0	0	0	<Null>	0	0	0	<Null>	<Null>	<Null>	0	<Null>	0	<Null>	0	<Null>	<Null>	<Null>	<Null>	<Null>	<Null>	<Null>	<Null>	<Null>	<Null>	<Null>	<Null>	Geological Survey of Canada - Pacific
772	759	Point	<Null>	<Null>	Canada West Coast	Canada West Coast_698	<Null>	<Null>	<Null>	0	<Null>	50.8164	-125.669	0	0	0	0	0	<Null>	0	0	0	0	0	<Null>	0	0	0	<Null>	<Null>	<Null>	0	<Null>	0	<Null>	0	<Null>	<Null>	<Null>	<Null>	<Null>	<Null>	<Null>	<Null>	<Null>	<Null>	<Null>	<Null>	Geological Survey of Canada - Pacific
773	760	Point	<Null>	<Null>	Canada West Coast	Canada West Coast_699	<Null>	<Null>	<Null>	0	<Null>	50.8217	-125.676	0	0	0	0	0	<Null>	0	0	0	0	0	<Null>	0	0	0	<Null>	<Null>	<Null>	0	<Null>	0	<Null>	0	<Null>	<Null>	<Null>	<Null>	<Null>	<Null>	<Null>	<Null>	<Null>	<Null>	<Null>	<Null>	Geological Survey of Canada - Pacific
774	761	Point	<Null>	<Null>	Canada West Coast	Canada West Coast_700	<Null>	<Null>	<Null>	0	<Null>	50.8725	-125.676	0	0	0	0	0	<Null>	0	0	0	0	0	<Null>	0	0	0	<Null>	<Null>	<Null>	0	<Null>	0	<Null>	0	<Null>	<Null>	<Null>	<Null>	<Null>	<Null>	<Null>	<Null>	<Null>	<Null>	<Null>	<Null>	Geological Survey of Canada - Pacific
775	762	Point	<Null>	<Null>	Canada West Coast	Canada West Coast_701	<Null>	<Null>	<Null>	0	<Null>	50.8074	-125.648	0	0	0	0	0	<Null>	0	0	0	0	0	<Null>	0	0	0	<Null>	<Null>	<Null>	0	<Null>	0	<Null>	0	<Null>	<Null>	<Null>	<Null>	<Null>	<Null>	<Null>	<Null>	<Null>	<Null>	<Null>	<Null>	Geological Survey of Canada - Pacific
776	763	Point	<Null>	<Null>	Canada West Coast	Canada West Coast_702	<Null>	<Null>	<Null>	0	<Null>	51.1098	-126.961	0	0	0	0	0	<Null>	0	0	0	0	0	<Null>	0	0	0	<Null>	<Null>	<Null>	0	<Null>	0	<Null>	0	<Null>	<Null>	<Null>	<Null>	<Null>	<Null>	<Null>	<Null>	<Null>	<Null>	<Null>	<Null>	Geological Survey of Canada - Pacific
777	764	Point	<Null>	<Null>	Canada West Coast	Canada West Coast_703	<Null>	<Null>	<Null>	0	<Null>	51.107	-126.934	0	0	0	0	0	<Null>	0	0	0	0	0	<Null>	0	0	0	<Null>	<Null>	<Null>	0	<Null>	0	<Null>	0	<Null>	<Null>	<Null>	<Null>	<Null>	<Null>	<Null>	<Null>	<Null>	<Null>	<Null>	<Null>	Geological Survey of Canada - Pacific
778	765	Point	<Null>	<Null>	Canada West Coast	Canada West Coast_704	<Null>	<Null>	<Null>	0	<Null>	51.1058	-127.012	0	0	0	0	0	<Null>	0	0	0	0	0	<Null>	0	0	0	<Null>	<Null>	<Null>	0	<Null>	0	<Null>	0	<Null>	<Null>	<Null>	<Null>	<Null>	<Null>	<Null>	<Null>	<Null>	<Null>	<Null>	<Null>	Geological Survey of Canada - Pacific
779	766	Point	<Null>	<Null>	Canada West Coast	Canada West Coast_705	<Null>	<Null>	<Null>	0	<Null>	51.1131	-127.042	0	0	0	0	0	<Null>	0	0	0	0	0	<Null>	0	0	0	<Null>	<Null>	<Null>	0	<Null>	0	<Null>	0	<Null>	<Null>	<Null>	<Null>	<Null>	<Null>	<Null>	<Null>	<Null>	<Null>	<Null>	<Null>	Geological Survey of Canada - Pacific
780	767	Point	<Null>	<Null>	Canada West Coast	Canada West Coast_706	<Null>	<Null>	<Null>	0	<Null>	51.1138	-127.065	0	0	0	0	0	<Null>	0	0	0	0	0	<Null>	0	0	0	<Null>	<Null>	<Null>	0	<Null>	0	<Null>	0	<Null>	<Null>	<Null>	<Null>	<Null>	<Null>	<Null>	<Null>	<Null>	<Null>	<Null>	<Null>	Geological Survey of Canada - Pacific
781	768	Point	<Null>	<Null>	Canada West Coast	Canada West Coast_707	<Null>	<Null>	<Null>	0	<Null>	51.1068	-127.038	0	0	0	0	0	<Null>	0	0	0	0	0	<Null>	0	0	0	<Null>	<Null>	<Null>	0	<Null>	0	<Null>	0	<Null>	<Null>	<Null>	<Null>	<Null>	<Null>	<Null>	<Null>	<Null>	<Null>	<Null>	<Null>	Geological Survey of Canada - Pacific
782	769	Point	<Null>	<Null>	Canada West Coast	Canada West Coast_708	<Null>	<Null>	<Null>	0	<Null>	51.1147	-127.074	0	0	0	0	0	<Null>	0	0	0	0	0	<Null>	0	0	0	<Null>	<Null>	<Null>	0	<Null>	0	<Null>	0	<Null>	<Null>	<Null>	<Null>	<Null>	<Null>	<Null>	<Null>	<Null>	<Null>	<Null>	<Null>	Geological Survey of Canada - Pacific
783	770	Point	<Null>	<Null>	Canada West Coast	Canada West Coast_709	<Null>	<Null>	<Null>	0	<Null>	51.1142	-127.084	0	0	0	0	0	<Null>	0	0	0	0	0	<Null>	0	0	0	<Null>	<Null>	<Null>	0	<Null>	0	<Null>	0	<Null>	<Null>	<Null>	<Null>	<Null>	<Null>	<Null>	<Null>	<Null>	<Null>	<Null>	<Null>	Geological Survey of Canada - Pacific
784	771	Point	<Null>	<Null>	Canada West Coast	Canada West Coast_710	<Null>	<Null>	<Null>	0	<Null>	51.1073	-127.078	0	0	0	0	0	<Null>	0	0	0	0	0	<Null>	0	0	0	<Null>	<Null>	<Null>	0	<Null>	0	<Null>	0	<Null>	<Null>	<Null>	<Null>	<Null>	<Null>	<Null>	<Null>	<Null>	<Null>	<Null>	<Null>	Geological Survey of Canada - Pacific
785	772	Point	<Null>	<Null>	Canada West Coast	Canada West Coast_711	<Null>	<Null>	<Null>	0	<Null>	51.1148	-127.135	0	0	0	0	0	<Null>	0	0	0	0	0	<Null>	0	0	0	<Null>	<Null>	<Null>	0	<Null>	0	<Null>	0	<Null>	<Null>	<Null>	<Null>	<Null>	<Null>	<Null>	<Null>	<Null>	<Null>	<Null>	<Null>	Geological Survey of Canada - Pacific
786	773	Point	<Null>	<Null>	Canada West Coast	Canada West Coast_712	<Null>	<Null>	<Null>	0	<Null>	51.117	-127.127	0	0	0	0	0	<Null>	0	0	0	0	0	<Null>	0	0	0	<Null>	<Null>	<Null>	0	<Null>	0	<Null>	0	<Null>	<Null>	<Null>	<Null>	<Null>	<Null>	<Null>	<Null>	<Null>	<Null>	<Null>	<Null>	Geological Survey of Canada - Pacific
787	774	Point	<Null>	<Null>	Canada West Coast	Canada West Coast_713	<Null>	<Null>	<Null>	0	<Null>	51.1102	-127.101	0	0	0	0	0	<Null>	0	0	0	0	0	<Null>	0	0	0	<Null>	<Null>	<Null>	0	<Null>	0	<Null>	0	<Null>	<Null>	<Null>	<Null>	<Null>	<Null>	<Null>	<Null>	<Null>	<Null>	<Null>	<Null>	Geological Survey of Canada - Pacific
788	775	Point	<Null>	<Null>	Canada West Coast	Canada West Coast_714	<Null>	<Null>	<Null>	0	<Null>	51.1087	-127.094	0	0	0	0	0	<Null>	0	0	0	0	0	<Null>	0	0	0	<Null>	<Null>	<Null>	0	<Null>	0	<Null>	0	<Null>	<Null>	<Null>	<Null>	<Null>	<Null>	<Null>	<Null>	<Null>	<Null>	<Null>	<Null>	Geological Survey of Canada - Pacific
789	776	Point	<Null>	<Null>	Canada West Coast	Canada West Coast_715	<Null>	<Null>	<Null>	0	<Null>	51.1147	-127.097	0	0	0	0	0	<Null>	0	0	0	0	0	<Null>	0	0	0	<Null>	<Null>	<Null>	0	<Null>	0	<Null>	0	<Null>	<Null>	<Null>	<Null>	<Null>	<Null>	<Null>	<Null>	<Null>	<Null>	<Null>	<Null>	Geological Survey of Canada - Pacific
790	777	Point	<Null>	<Null>	Canada West Coast	Canada West Coast_716	<Null>	<Null>	<Null>	0	<Null>	51.1151	-127.106	0	0	0	0	0	<Null>	0	0	0	0	0	<Null>	0	0	0	<Null>	<Null>	<Null>	0	<Null>	0	<Null>	0	<Null>	<Null>	<Null>	<Null>	<Null>	<Null>	<Null>	<Null>	<Null>	<Null>	<Null>	<Null>	Geological Survey of Canada - Pacific
791	778	Point	<Null>	<Null>	Canada West Coast	Canada West Coast_717	<Null>	<Null>	<Null>	0	<Null>	51.1051	-126.983	0	0	0	0	0	<Null>	0	0	0	0	0	<Null>	0	0	0	<Null>	<Null>	<Null>	0	<Null>	0	<Null>	0	<Null>	<Null>	<Null>	<Null>	<Null>	<Null>	<Null>	<Null>	<Null>	<Null>	<Null>	<Null>	Geological Survey of Canada - Pacific
792	779	Point	<Null>	<Null>	Canada West Coast	Canada West Coast_718	<Null>	<Null>	<Null>	0	<Null>	51.1169	-127.156	0	0	0	0	0	<Null>	0	0	0	0	0	<Null>	0	0	0	<Null>	<Null>	<Null>	0	<Null>	0	<Null>	0	<Null>	<Null>	<Null>	<Null>	<Null>	<Null>	<Null>	<Null>	<Null>	<Null>	<Null>	<Null>	Geological Survey of Canada - Pacific
793	780	Point	<Null>	<Null>	Canada West Coast	Canada West Coast_719	<Null>	<Null>	<Null>	0	<Null>	53.9633	-128.683	0	0	0	0	0	<Null>	0	0	0	0	0	<Null>	0	0	0	<Null>	<Null>	<Null>	0	<Null>	0	<Null>	0	<Null>	<Null>	<Null>	<Null>	<Null>	<Null>	<Null>	<Null>	Fjord Seascape - Submarine slide complex	<Null>	<Null>	<Null>	Geological Survey of Canada - Pacific
794	781	Point	<Null>	<Null>	Canada West Coast	Canada West Coast_720	<Null>	<Null>	<Null>	0	<Null>	53.9479	-128.669	0	0	0	0	0	<Null>	0	0	0	0	0	<Null>	0	0	0	<Null>	<Null>	<Null>	0	<Null>	0	<Null>	0	<Null>	<Null>	<Null>	<Null>	<Null>	<Null>	<Null>	<Null>	Fjord Seascape - Deltas	<Null>	<Null>	<Null>	Geological Survey of Canada - Pacific
795	782	Point	<Null>	<Null>	Canada West Coast	Canada West Coast_721	<Null>	<Null>	<Null>	0	<Null>	53.9553	-128.661	0	0	0	0	0	<Null>	0	0	0	0	0	<Null>	0	0	0	<Null>	<Null>	<Null>	0	<Null>	0	<Null>	0	<Null>	<Null>	<Null>	<Null>	<Null>	<Null>	<Null>	<Null>	Fjord Seascape - Unconsolidated sidewall	<Null>	<Null>	<Null>	Geological Survey of Canada - Pacific
796	783	Point	<Null>	<Null>	Canada West Coast	Canada West Coast_722	<Null>	<Null>	<Null>	0	<Null>	53.9747	-128.66	0	0	0	0	0	<Null>	0	0	0	0	0	<Null>	0	0	0	<Null>	<Null>	<Null>	0	<Null>	0	<Null>	0	<Null>	<Null>	<Null>	<Null>	<Null>	<Null>	<Null>	<Null>	Fjord Seascape - Deltas	<Null>	<Null>	<Null>	Geological Survey of Canada - Pacific
797	784	Point	<Null>	<Null>	Canada West Coast	Canada West Coast_723	<Null>	<Null>	<Null>	0	<Null>	53.0631	-129.319	0	0	0	0	0	<Null>	0	0	0	0	0	<Null>	0	0	0	<Null>	<Null>	<Null>	0	<Null>	0	<Null>	0	<Null>	<Null>	<Null>	<Null>	<Null>	<Null>	<Null>	<Null>	Fjord Seascape - Mass transport complex	<Null>	<Null>	<Null>	Geological Survey of Canada - Pacific
798	785	Point	<Null>	<Null>	Canada West Coast	Canada West Coast_724	<Null>	<Null>	<Null>	0	<Null>	53.0717	-129.303	0	0	0	0	0	<Null>	0	0	0	0	0	<Null>	0	0	0	<Null>	<Null>	<Null>	0	<Null>	0	<Null>	0	<Null>	<Null>	<Null>	<Null>	<Null>	<Null>	<Null>	<Null>	Fjord Seascape - Mass transport complex	<Null>	<Null>	<Null>	Geological Survey of Canada - Pacific
799	786	Point	<Null>	<Null>	Canada West Coast	Canada West Coast_725	<Null>	<Null>	<Null>	0	<Null>	53.0867	-129.363	0	0	0	0	0	<Null>	0	0	0	0	0	<Null>	0	0	0	<Null>	<Null>	<Null>	0	<Null>	0	<Null>	0	<Null>	<Null>	<Null>	<Null>	<Null>	<Null>	<Null>	<Null>	Fjord Seascape - Postglacial Mud	<Null>	<Null>	<Null>	Geological Survey of Canada - Pacific
800	787	Point	<Null>	<Null>	Canada West Coast	Canada West Coast_726	<Null>	<Null>	<Null>	0	<Null>	53.1109	-129.391	0	0	0	0	0	<Null>	0	0	0	0	0	<Null>	0	0	0	<Null>	<Null>	<Null>	0	<Null>	0	<Null>	0	<Null>	<Null>	<Null>	<Null>	<Null>	<Null>	<Null>	<Null>	Fjord Seascape - Postglacial Mud	<Null>	<Null>	<Null>	Geological Survey of Canada - Pacific
801	788	Point	<Null>	<Null>	Canada West Coast	Canada West Coast_727	<Null>	<Null>	<Null>	0	<Null>	53.0381	-129.306	0	0	0	0	0	<Null>	0	0	0	0	0	<Null>	0	0	0	<Null>	<Null>	<Null>	0	<Null>	0	<Null>	0	<Null>	<Null>	<Null>	<Null>	<Null>	<Null>	<Null>	<Null>	Fjord Seascape - Bedrock sidewall	<Null>	<Null>	<Null>	Geological Survey of Canada - Pacific
802	789	Point	<Null>	<Null>	Canada West Coast	Canada West Coast_728	<Null>	<Null>	<Null>	0	<Null>	53.8322	-128.504	0	0	0	0	0	<Null>	0	0	0	0	0	<Null>	0	0	0	<Null>	<Null>	<Null>	0	<Null>	0	<Null>	0	<Null>	<Null>	<Null>	<Null>	<Null>	<Null>	<Null>	<Null>	Fjord Seascape - Major Deltas	<Null>	<Null>	<Null>	Geological Survey of Canada - Pacific
803	790	Point	<Null>	<Null>	Canada West Coast	Canada West Coast_729	<Null>	<Null>	<Null>	0	<Null>	53.8405	-128.515	0	0	0	0	0	<Null>	0	0	0	0	0	<Null>	0	0	0	<Null>	<Null>	<Null>	0	<Null>	0	<Null>	0	<Null>	<Null>	<Null>	<Null>	<Null>	<Null>	<Null>	<Null>	Fjord Seascape - Major Deltas	<Null>	<Null>	<Null>	Geological Survey of Canada - Pacific
804	791	Point	<Null>	<Null>	Canada West Coast	Canada West Coast_730	<Null>	<Null>	<Null>	0	<Null>	53.8343	-128.525	0	0	0	0	0	<Null>	0	0	0	0	0	<Null>	0	0	0	<Null>	<Null>	<Null>	0	<Null>	0	<Null>	0	<Null>	<Null>	<Null>	<Null>	<Null>	<Null>	<Null>	<Null>	Fjord Seascape - Major Deltas	<Null>	<Null>	<Null>	Geological Survey of Canada - Pacific
805	792	Point	<Null>	<Null>	Canada West Coast	Canada West Coast_731	<Null>	<Null>	<Null>	0	<Null>	53.8355	-128.542	0	0	0	0	0	<Null>	0	0	0	0	0	<Null>	0	0	0	<Null>	<Null>	<Null>	0	<Null>	0	<Null>	0	<Null>	<Null>	<Null>	<Null>	<Null>	<Null>	<Null>	<Null>	Fjord Seascape - Debris flow	<Null>	<Null>	<Null>	Geological Survey of Canada - Pacific
806	793	Point	<Null>	<Null>	Canada West Coast	Canada West Coast_732	<Null>	<Null>	<Null>	0	<Null>	53.6521	-129.752	0	0	0	0	0	<Null>	0	0	0	0	0	<Null>	0	0	0	<Null>	<Null>	<Null>	0	<Null>	0	<Null>	0	<Null>	<Null>	<Null>	<Null>	<Null>	<Null>	<Null>	<Null>	<Null>	<Null>	<Null>	<Null>	Geological Survey of Canada - Pacific
807	794	Point	<Null>	<Null>	Canada West Coast	Canada West Coast_733	<Null>	<Null>	<Null>	0	<Null>	53.9538	-130.168	0	0	0	0	0	<Null>	0	0	0	0	0	<Null>	0	0	0	<Null>	<Null>	<Null>	0	<Null>	0	<Null>	0	<Null>	<Null>	<Null>	<Null>	<Null>	<Null>	<Null>	<Null>	<Null>	<Null>	<Null>	<Null>	Geological Survey of Canada - Pacific
808	795	Point	<Null>	<Null>	Canada West Coast	Canada West Coast_734	<Null>	<Null>	<Null>	0	<Null>	53.7172	-129.832	0	0	0	0	0	<Null>	0	0	0	0	0	<Null>	0	0	0	<Null>	<Null>	<Null>	0	<Null>	0	<Null>	0	<Null>	<Null>	<Null>	<Null>	<Null>	<Null>	<Null>	<Null>	<Null>	<Null>	<Null>	<Null>	Geological Survey of Canada - Pacific
809	796	Point	<Null>	<Null>	Canada West Coast	Canada West Coast_735	<Null>	<Null>	<Null>	0	<Null>	53.7272	-129.822	0	0	0	0	0	<Null>	0	0	0	0	0	<Null>	0	0	0	<Null>	<Null>	<Null>	0	<Null>	0	<Null>	0	<Null>	<Null>	<Null>	<Null>	<Null>	<Null>	<Null>	<Null>	<Null>	<Null>	<Null>	<Null>	Geological Survey of Canada - Pacific
810	797	Point	<Null>	<Null>	Canada West Coast	Canada West Coast_736	<Null>	<Null>	<Null>	0	<Null>	53.7255	-129.846	0	0	0	0	0	<Null>	0	0	0	0	0	<Null>	0	0	0	<Null>	<Null>	<Null>	0	<Null>	0	<Null>	0	<Null>	<Null>	<Null>	<Null>	<Null>	<Null>	<Null>	<Null>	<Null>	<Null>	<Null>	<Null>	Geological Survey of Canada - Pacific
811	798	Point	<Null>	<Null>	Canada West Coast	Canada West Coast_737	<Null>	<Null>	<Null>	0	<Null>	53.6694	-129.1	0	0	0	0	0	<Null>	0	0	0	0	0	<Null>	0	0	0	<Null>	<Null>	<Null>	0	<Null>	0	<Null>	0	<Null>	<Null>	<Null>	<Null>	<Null>	<Null>	<Null>	<Null>	Fjord Seascape - Deltas	<Null>	<Null>	<Null>	Geological Survey of Canada - Pacific
812	799	Point	<Null>	<Null>	Canada West Coast	Canada West Coast_738	<Null>	<Null>	<Null>	0	<Null>	53.7292	-129.074	0	0	0	0	0	<Null>	0	0	0	0	0	<Null>	0	0	0	<Null>	<Null>	<Null>	0	<Null>	0	<Null>	0	<Null>	<Null>	<Null>	<Null>	<Null>	<Null>	<Null>	<Null>	Fjord Seascape - Deltas	<Null>	<Null>	<Null>	Geological Survey of Canada - Pacific
813	800	Point	<Null>	<Null>	Canada West Coast	Canada West Coast_739	<Null>	<Null>	<Null>	0	<Null>	53.7203	-129.029	0	0	0	0	0	<Null>	0	0	0	0	0	<Null>	0	0	0	<Null>	<Null>	<Null>	0	<Null>	0	<Null>	0	<Null>	<Null>	<Null>	<Null>	<Null>	<Null>	<Null>	<Null>	Fjord Seascape - Deltas	<Null>	<Null>	<Null>	Geological Survey of Canada - Pacific
814	801	Point	<Null>	<Null>	Canada West Coast	Canada West Coast_740	<Null>	<Null>	<Null>	0	<Null>	53.7077	-129.122	0	0	0	0	0	<Null>	0	0	0	0	0	<Null>	0	0	0	<Null>	<Null>	<Null>	0	<Null>	0	<Null>	0	<Null>	<Null>	<Null>	<Null>	<Null>	<Null>	<Null>	<Null>	Fjord Seascape - Deltas	<Null>	<Null>	<Null>	Geological Survey of Canada - Pacific
815	802	Point	<Null>	<Null>	Canada West Coast	Canada West Coast_741	<Null>	<Null>	<Null>	0	<Null>	53.7132	-129.115	0	0	0	0	0	<Null>	0	0	0	0	0	<Null>	0	0	0	<Null>	<Null>	<Null>	0	<Null>	0	<Null>	0	<Null>	<Null>	<Null>	<Null>	<Null>	<Null>	<Null>	<Null>	Fjord Seascape - Deltas	<Null>	<Null>	<Null>	Geological Survey of Canada - Pacific
816	803	Point	<Null>	<Null>	Canada West Coast	Canada West Coast_742	<Null>	<Null>	<Null>	0	<Null>	53.7185	-129.107	0	0	0	0	0	<Null>	0	0	0	0	0	<Null>	0	0	0	<Null>	<Null>	<Null>	0	<Null>	0	<Null>	0	<Null>	<Null>	<Null>	<Null>	<Null>	<Null>	<Null>	<Null>	Fjord Seascape - Deltas	<Null>	<Null>	<Null>	Geological Survey of Canada - Pacific
817	804	Point	<Null>	<Null>	Canada West Coast	Canada West Coast_743	<Null>	<Null>	<Null>	0	<Null>	53.0055	-129.299	0	0	0	0	0	<Null>	0	0	0	0	0	<Null>	0	0	0	<Null>	<Null>	<Null>	0	<Null>	0	<Null>	0	<Null>	<Null>	<Null>	<Null>	<Null>	<Null>	<Null>	<Null>	Fjord Seascape - Bedrock sidewall	<Null>	<Null>	<Null>	Geological Survey of Canada - Pacific
818	805	Point	<Null>	<Null>	Canada West Coast	Canada West Coast_744	<Null>	<Null>	<Null>	0	<Null>	53.0078	-129.204	0	0	0	0	0	<Null>	0	0	0	0	0	<Null>	0	0	0	<Null>	<Null>	<Null>	0	<Null>	0	<Null>	0	<Null>	<Null>	<Null>	<Null>	<Null>	<Null>	<Null>	<Null>	Fjord Seascape - Unconsolidated sidewall	<Null>	<Null>	<Null>	Geological Survey of Canada - Pacific
819	806	Point	<Null>	<Null>	Canada West Coast	Canada West Coast_745	<Null>	<Null>	<Null>	0	<Null>	53.1242	-129.135	0	0	0	0	0	<Null>	0	0	0	0	0	<Null>	0	0	0	<Null>	<Null>	<Null>	0	<Null>	0	<Null>	0	<Null>	<Null>	<Null>	<Null>	<Null>	<Null>	<Null>	<Null>	Fjord Seascape - Postglacial Mud	<Null>	<Null>	<Null>	Geological Survey of Canada - Pacific
820	807	Point	<Null>	<Null>	Canada West Coast	Canada West Coast_746	<Null>	<Null>	<Null>	0	<Null>	53.2723	-129.17	0	0	0	0	0	<Null>	0	0	0	0	0	<Null>	0	0	0	<Null>	<Null>	<Null>	0	<Null>	0	<Null>	0	<Null>	<Null>	<Null>	<Null>	<Null>	<Null>	<Null>	<Null>	Fjord Seascape - Deltas	<Null>	<Null>	<Null>	Geological Survey of Canada - Pacific
821	808	Point	<Null>	<Null>	Canada West Coast	Canada West Coast_747	<Null>	<Null>	<Null>	0	<Null>	53.2533	-129.168	0	0	0	0	0	<Null>	0	0	0	0	0	<Null>	0	0	0	<Null>	<Null>	<Null>	0	<Null>	0	<Null>	0	<Null>	<Null>	<Null>	<Null>	<Null>	<Null>	<Null>	<Null>	Fjord Seascape - Unconsolidated sidewall	<Null>	<Null>	<Null>	Geological Survey of Canada - Pacific
822	809	Point	<Null>	<Null>	Canada West Coast	Canada West Coast_748	<Null>	<Null>	<Null>	0	<Null>	53.7767	-129.911	0	0	0	0	0	<Null>	0	0	0	0	0	<Null>	0	0	0	<Null>	<Null>	<Null>	0	<Null>	0	<Null>	0	<Null>	<Null>	<Null>	<Null>	<Null>	<Null>	<Null>	<Null>	<Null>	<Null>	<Null>	<Null>	Geological Survey of Canada - Pacific
823	810	Point	<Null>	<Null>	Canada West Coast	Canada West Coast_749	<Null>	<Null>	<Null>	0	<Null>	53.7734	-129.907	0	0	0	0	0	<Null>	0	0	0	0	0	<Null>	0	0	0	<Null>	<Null>	<Null>	0	<Null>	0	<Null>	0	<Null>	<Null>	<Null>	<Null>	<Null>	<Null>	<Null>	<Null>	<Null>	<Null>	<Null>	<Null>	Geological Survey of Canada - Pacific
824	811	Point	<Null>	<Null>	Canada West Coast	Canada West Coast_750	<Null>	<Null>	<Null>	0	<Null>	53.7713	-129.935	0	0	0	0	0	<Null>	0	0	0	0	0	<Null>	0	0	0	<Null>	<Null>	<Null>	0	<Null>	0	<Null>	0	<Null>	<Null>	<Null>	<Null>	<Null>	<Null>	<Null>	<Null>	<Null>	<Null>	<Null>	<Null>	Geological Survey of Canada - Pacific
825	812	Point	<Null>	<Null>	Canada West Coast	Canada West Coast_751	<Null>	<Null>	<Null>	0	<Null>	53.7546	-129.902	0	0	0	0	0	<Null>	0	0	0	0	0	<Null>	0	0	0	<Null>	<Null>	<Null>	0	<Null>	0	<Null>	0	<Null>	<Null>	<Null>	<Null>	<Null>	<Null>	<Null>	<Null>	<Null>	<Null>	<Null>	<Null>	Geological Survey of Canada - Pacific
826	813	Point	<Null>	<Null>	Canada West Coast	Canada West Coast_752	<Null>	<Null>	<Null>	0	<Null>	53.7477	-129.887	0	0	0	0	0	<Null>	0	0	0	0	0	<Null>	0	0	0	<Null>	<Null>	<Null>	0	<Null>	0	<Null>	0	<Null>	<Null>	<Null>	<Null>	<Null>	<Null>	<Null>	<Null>	<Null>	<Null>	<Null>	<Null>	Geological Survey of Canada - Pacific
827	814	Point	<Null>	<Null>	Canada West Coast	Canada West Coast_753	<Null>	<Null>	<Null>	0	<Null>	53.7388	-129.871	0	0	0	0	0	<Null>	0	0	0	0	0	<Null>	0	0	0	<Null>	<Null>	<Null>	0	<Null>	0	<Null>	0	<Null>	<Null>	<Null>	<Null>	<Null>	<Null>	<Null>	<Null>	<Null>	<Null>	<Null>	<Null>	Geological Survey of Canada - Pacific
828	815	Point	<Null>	<Null>	Canada West Coast	Canada West Coast_754	<Null>	<Null>	<Null>	0	<Null>	53.7386	-129.845	0	0	0	0	0	<Null>	0	0	0	0	0	<Null>	0	0	0	<Null>	<Null>	<Null>	0	<Null>	0	<Null>	0	<Null>	<Null>	<Null>	<Null>	<Null>	<Null>	<Null>	<Null>	<Null>	<Null>	<Null>	<Null>	Geological Survey of Canada - Pacific
829	816	Point	<Null>	<Null>	Canada West Coast	Canada West Coast_755	<Null>	<Null>	<Null>	0	<Null>	53.6885	-129.796	0	0	0	0	0	<Null>	0	0	0	0	0	<Null>	0	0	0	<Null>	<Null>	<Null>	0	<Null>	0	<Null>	0	<Null>	<Null>	<Null>	<Null>	<Null>	<Null>	<Null>	<Null>	<Null>	<Null>	<Null>	<Null>	Geological Survey of Canada - Pacific
830	817	Point	<Null>	<Null>	Canada West Coast	Canada West Coast_756	<Null>	<Null>	<Null>	0	<Null>	53.69	-129.798	0	0	0	0	0	<Null>	0	0	0	0	0	<Null>	0	0	0	<Null>	<Null>	<Null>	0	<Null>	0	<Null>	0	<Null>	<Null>	<Null>	<Null>	<Null>	<Null>	<Null>	<Null>	<Null>	<Null>	<Null>	<Null>	Geological Survey of Canada - Pacific
831	818	Point	<Null>	<Null>	Canada West Coast	Canada West Coast_757	<Null>	<Null>	<Null>	0	<Null>	53.6914	-129.801	0	0	0	0	0	<Null>	0	0	0	0	0	<Null>	0	0	0	<Null>	<Null>	<Null>	0	<Null>	0	<Null>	0	<Null>	<Null>	<Null>	<Null>	<Null>	<Null>	<Null>	<Null>	<Null>	<Null>	<Null>	<Null>	Geological Survey of Canada - Pacific
832	819	Point	<Null>	<Null>	Canada West Coast	Canada West Coast_758	<Null>	<Null>	<Null>	0	<Null>	53.6937	-129.804	0	0	0	0	0	<Null>	0	0	0	0	0	<Null>	0	0	0	<Null>	<Null>	<Null>	0	<Null>	0	<Null>	0	<Null>	<Null>	<Null>	<Null>	<Null>	<Null>	<Null>	<Null>	<Null>	<Null>	<Null>	<Null>	Geological Survey of Canada - Pacific
833	820	Point	<Null>	<Null>	Canada West Coast	Canada West Coast_759	<Null>	<Null>	<Null>	0	<Null>	53.6827	-129.787	0	0	0	0	0	<Null>	0	0	0	0	0	<Null>	0	0	0	<Null>	<Null>	<Null>	0	<Null>	0	<Null>	0	<Null>	<Null>	<Null>	<Null>	<Null>	<Null>	<Null>	<Null>	<Null>	<Null>	<Null>	<Null>	Geological Survey of Canada - Pacific
834	821	Point	<Null>	<Null>	Canada West Coast	Canada West Coast_760	<Null>	<Null>	<Null>	0	<Null>	53.6645	-129.768	0	0	0	0	0	<Null>	0	0	0	0	0	<Null>	0	0	0	<Null>	<Null>	<Null>	0	<Null>	0	<Null>	0	<Null>	<Null>	<Null>	<Null>	<Null>	<Null>	<Null>	<Null>	<Null>	<Null>	<Null>	<Null>	Geological Survey of Canada - Pacific
835	822	Point	<Null>	<Null>	Canada West Coast	Canada West Coast_761	<Null>	<Null>	<Null>	0	<Null>	53.6152	-129.714	0	0	0	0	0	<Null>	0	0	0	0	0	<Null>	0	0	0	<Null>	<Null>	<Null>	0	<Null>	0	<Null>	0	<Null>	<Null>	<Null>	<Null>	<Null>	<Null>	<Null>	<Null>	<Null>	<Null>	<Null>	<Null>	Geological Survey of Canada - Pacific
836	823	Point	<Null>	<Null>	Canada West Coast	Canada West Coast_762	<Null>	<Null>	<Null>	0	<Null>	53.5411	-129.611	0	0	0	0	0	<Null>	0	0	0	0	0	<Null>	0	0	0	<Null>	<Null>	<Null>	0	<Null>	0	<Null>	0	<Null>	<Null>	<Null>	<Null>	<Null>	<Null>	<Null>	<Null>	<Null>	<Null>	<Null>	<Null>	Geological Survey of Canada - Pacific
837	824	Point	<Null>	<Null>	Canada West Coast	Canada West Coast_763	<Null>	<Null>	<Null>	0	<Null>	53.5368	-129.604	0	0	0	0	0	<Null>	0	0	0	0	0	<Null>	0	0	0	<Null>	<Null>	<Null>	0	<Null>	0	<Null>	0	<Null>	<Null>	<Null>	<Null>	<Null>	<Null>	<Null>	<Null>	<Null>	<Null>	<Null>	<Null>	Geological Survey of Canada - Pacific
838	825	Point	<Null>	<Null>	Canada West Coast	Canada West Coast_764	<Null>	<Null>	<Null>	0	<Null>	53.5338	-129.591	0	0	0	0	0	<Null>	0	0	0	0	0	<Null>	0	0	0	<Null>	<Null>	<Null>	0	<Null>	0	<Null>	0	<Null>	<Null>	<Null>	<Null>	<Null>	<Null>	<Null>	<Null>	<Null>	<Null>	<Null>	<Null>	Geological Survey of Canada - Pacific
839	826	Point	<Null>	<Null>	Canada West Coast	Canada West Coast_765	<Null>	<Null>	<Null>	0	<Null>	53.5891	-129.686	0	0	0	0	0	<Null>	0	0	0	0	0	<Null>	0	0	0	<Null>	<Null>	<Null>	0	<Null>	0	<Null>	0	<Null>	<Null>	<Null>	<Null>	<Null>	<Null>	<Null>	<Null>	<Null>	<Null>	<Null>	<Null>	Geological Survey of Canada - Pacific
840	827	Point	<Null>	<Null>	Canada West Coast	Canada West Coast_766	<Null>	<Null>	<Null>	0	<Null>	53.5781	-129.668	0	0	0	0	0	<Null>	0	0	0	0	0	<Null>	0	0	0	<Null>	<Null>	<Null>	0	<Null>	0	<Null>	0	<Null>	<Null>	<Null>	<Null>	<Null>	<Null>	<Null>	<Null>	<Null>	<Null>	<Null>	<Null>	Geological Survey of Canada - Pacific
841	828	Point	<Null>	<Null>	Canada West Coast	Canada West Coast_767	<Null>	<Null>	<Null>	0	<Null>	53.5541	-129.627	0	0	0	0	0	<Null>	0	0	0	0	0	<Null>	0	0	0	<Null>	<Null>	<Null>	0	<Null>	0	<Null>	0	<Null>	<Null>	<Null>	<Null>	<Null>	<Null>	<Null>	<Null>	<Null>	<Null>	<Null>	<Null>	Geological Survey of Canada - Pacific
842	829	Point	<Null>	<Null>	Canada West Coast	Canada West Coast_768	<Null>	<Null>	<Null>	0	<Null>	53.5553	-129.629	0	0	0	0	0	<Null>	0	0	0	0	0	<Null>	0	0	0	<Null>	<Null>	<Null>	0	<Null>	0	<Null>	0	<Null>	<Null>	<Null>	<Null>	<Null>	<Null>	<Null>	<Null>	<Null>	<Null>	<Null>	<Null>	Geological Survey of Canada - Pacific
843	830	Point	<Null>	<Null>	Canada West Coast	Canada West Coast_769	<Null>	<Null>	<Null>	0	<Null>	53.5613	-129.64	0	0	0	0	0	<Null>	0	0	0	0	0	<Null>	0	0	0	<Null>	<Null>	<Null>	0	<Null>	0	<Null>	0	<Null>	<Null>	<Null>	<Null>	<Null>	<Null>	<Null>	<Null>	<Null>	<Null>	<Null>	<Null>	Geological Survey of Canada - Pacific
844	831	Point	<Null>	<Null>	Canada West Coast	Canada West Coast_770	<Null>	<Null>	<Null>	0	<Null>	53.5237	-129.576	0	0	0	0	0	<Null>	0	0	0	0	0	<Null>	0	0	0	<Null>	<Null>	<Null>	0	<Null>	0	<Null>	0	<Null>	<Null>	<Null>	<Null>	<Null>	<Null>	<Null>	<Null>	<Null>	<Null>	<Null>	<Null>	Geological Survey of Canada - Pacific
845	832	Point	<Null>	<Null>	Canada West Coast	Canada West Coast_771	<Null>	<Null>	<Null>	0	<Null>	53.5215	-129.571	0	0	0	0	0	<Null>	0	0	0	0	0	<Null>	0	0	0	<Null>	<Null>	<Null>	0	<Null>	0	<Null>	0	<Null>	<Null>	<Null>	<Null>	<Null>	<Null>	<Null>	<Null>	<Null>	<Null>	<Null>	<Null>	Geological Survey of Canada - Pacific
846	833	Point	<Null>	<Null>	Canada West Coast	Canada West Coast_772	<Null>	<Null>	<Null>	0	<Null>	53.5192	-129.566	0	0	0	0	0	<Null>	0	0	0	0	0	<Null>	0	0	0	<Null>	<Null>	<Null>	0	<Null>	0	<Null>	0	<Null>	<Null>	<Null>	<Null>	<Null>	<Null>	<Null>	<Null>	<Null>	<Null>	<Null>	<Null>	Geological Survey of Canada - Pacific
847	834	Point	<Null>	<Null>	Canada West Coast	Canada West Coast_773	<Null>	<Null>	<Null>	0	<Null>	53.516	-129.567	0	0	0	0	0	<Null>	0	0	0	0	0	<Null>	0	0	0	<Null>	<Null>	<Null>	0	<Null>	0	<Null>	0	<Null>	<Null>	<Null>	<Null>	<Null>	<Null>	<Null>	<Null>	<Null>	<Null>	<Null>	<Null>	Geological Survey of Canada - Pacific
848	835	Point	<Null>	<Null>	Canada West Coast	Canada West Coast_774	<Null>	<Null>	<Null>	0	<Null>	53.5093	-129.55	0	0	0	0	0	<Null>	0	0	0	0	0	<Null>	0	0	0	<Null>	<Null>	<Null>	0	<Null>	0	<Null>	0	<Null>	<Null>	<Null>	<Null>	<Null>	<Null>	<Null>	<Null>	<Null>	<Null>	<Null>	<Null>	Geological Survey of Canada - Pacific
849	836	Point	<Null>	<Null>	Canada West Coast	Canada West Coast_775	<Null>	<Null>	<Null>	0	<Null>	53.5116	-129.554	0	0	0	0	0	<Null>	0	0	0	0	0	<Null>	0	0	0	<Null>	<Null>	<Null>	0	<Null>	0	<Null>	0	<Null>	<Null>	<Null>	<Null>	<Null>	<Null>	<Null>	<Null>	<Null>	<Null>	<Null>	<Null>	Geological Survey of Canada - Pacific
850	837	Point	<Null>	<Null>	Canada West Coast	Canada West Coast_776	<Null>	<Null>	<Null>	0	<Null>	53.5042	-129.543	0	0	0	0	0	<Null>	0	0	0	0	0	<Null>	0	0	0	<Null>	<Null>	<Null>	0	<Null>	0	<Null>	0	<Null>	<Null>	<Null>	<Null>	<Null>	<Null>	<Null>	<Null>	Fjord Seascape - Unconsolidated sidewall	<Null>	<Null>	<Null>	Geological Survey of Canada - Pacific
851	838	Point	<Null>	<Null>	Canada West Coast	Canada West Coast_777	<Null>	<Null>	<Null>	0	<Null>	53.4503	-129.45	0	0	0	0	0	<Null>	0	0	0	0	0	<Null>	0	0	0	<Null>	<Null>	<Null>	0	<Null>	0	<Null>	0	<Null>	<Null>	<Null>	<Null>	<Null>	<Null>	<Null>	<Null>	Fjord Seascape - Unconsolidated sidewall	<Null>	<Null>	<Null>	Geological Survey of Canada - Pacific
852	839	Point	<Null>	<Null>	Canada West Coast	Canada West Coast_778	<Null>	<Null>	<Null>	0	<Null>	53.4431	-129.439	0	0	0	0	0	<Null>	0	0	0	0	0	<Null>	0	0	0	<Null>	<Null>	<Null>	0	<Null>	0	<Null>	0	<Null>	<Null>	<Null>	<Null>	<Null>	<Null>	<Null>	<Null>	Fjord Seascape - Bedrock sidewall	<Null>	<Null>	<Null>	Geological Survey of Canada - Pacific
853	840	Point	<Null>	<Null>	Canada West Coast	Canada West Coast_779	<Null>	<Null>	<Null>	0	<Null>	53.4262	-129.413	0	0	0	0	0	<Null>	0	0	0	0	0	<Null>	0	0	0	<Null>	<Null>	<Null>	0	<Null>	0	<Null>	0	<Null>	<Null>	<Null>	<Null>	<Null>	<Null>	<Null>	<Null>	Fjord Seascape - Unconsolidated sidewall	<Null>	<Null>	<Null>	Geological Survey of Canada - Pacific
854	841	Point	<Null>	<Null>	Canada West Coast	Canada West Coast_780	<Null>	<Null>	<Null>	0	<Null>	53.4293	-129.417	0	0	0	0	0	<Null>	0	0	0	0	0	<Null>	0	0	0	<Null>	<Null>	<Null>	0	<Null>	0	<Null>	0	<Null>	<Null>	<Null>	<Null>	<Null>	<Null>	<Null>	<Null>	Fjord Seascape - Unconsolidated sidewall	<Null>	<Null>	<Null>	Geological Survey of Canada - Pacific
855	842	Point	<Null>	<Null>	Canada West Coast	Canada West Coast_781	<Null>	<Null>	<Null>	0	<Null>	53.4309	-129.421	0	0	0	0	0	<Null>	0	0	0	0	0	<Null>	0	0	0	<Null>	<Null>	<Null>	0	<Null>	0	<Null>	0	<Null>	<Null>	<Null>	<Null>	<Null>	<Null>	<Null>	<Null>	Fjord Seascape - Unconsolidated sidewall	<Null>	<Null>	<Null>	Geological Survey of Canada - Pacific
856	843	Point	<Null>	<Null>	Canada West Coast	Canada West Coast_782	<Null>	<Null>	<Null>	0	<Null>	53.416	-129.398	0	0	0	0	0	<Null>	0	0	0	0	0	<Null>	0	0	0	<Null>	<Null>	<Null>	0	<Null>	0	<Null>	0	<Null>	<Null>	<Null>	<Null>	<Null>	<Null>	<Null>	<Null>	Fjord Seascape - Unconsolidated sidewall	<Null>	<Null>	<Null>	Geological Survey of Canada - Pacific
857	844	Point	<Null>	<Null>	Canada West Coast	Canada West Coast_783	<Null>	<Null>	<Null>	0	<Null>	53.4097	-129.392	0	0	0	0	0	<Null>	0	0	0	0	0	<Null>	0	0	0	<Null>	<Null>	<Null>	0	<Null>	0	<Null>	0	<Null>	<Null>	<Null>	<Null>	<Null>	<Null>	<Null>	<Null>	Fjord Seascape - Unconsolidated sidewall	<Null>	<Null>	<Null>	Geological Survey of Canada - Pacific
858	845	Point	<Null>	<Null>	Canada West Coast	Canada West Coast_784	<Null>	<Null>	<Null>	0	<Null>	53.3998	-129.375	0	0	0	0	0	<Null>	0	0	0	0	0	<Null>	0	0	0	<Null>	<Null>	<Null>	0	<Null>	0	<Null>	0	<Null>	<Null>	<Null>	<Null>	<Null>	<Null>	<Null>	<Null>	Fjord Seascape - Unconsolidated sidewall	<Null>	<Null>	<Null>	Geological Survey of Canada - Pacific
859	846	Point	<Null>	<Null>	Canada West Coast	Canada West Coast_785	<Null>	<Null>	<Null>	0	<Null>	53.4015	-129.378	0	0	0	0	0	<Null>	0	0	0	0	0	<Null>	0	0	0	<Null>	<Null>	<Null>	0	<Null>	0	<Null>	0	<Null>	<Null>	<Null>	<Null>	<Null>	<Null>	<Null>	<Null>	Fjord Seascape - Unconsolidated sidewall	<Null>	<Null>	<Null>	Geological Survey of Canada - Pacific
860	847	Point	<Null>	<Null>	Canada West Coast	Canada West Coast_786	<Null>	<Null>	<Null>	0	<Null>	53.4037	-129.381	0	0	0	0	0	<Null>	0	0	0	0	0	<Null>	0	0	0	<Null>	<Null>	<Null>	0	<Null>	0	<Null>	0	<Null>	<Null>	<Null>	<Null>	<Null>	<Null>	<Null>	<Null>	Fjord Seascape - Unconsolidated sidewall	<Null>	<Null>	<Null>	Geological Survey of Canada - Pacific
861	848	Point	<Null>	<Null>	Canada West Coast	Canada West Coast_787	<Null>	<Null>	<Null>	0	<Null>	53.4053	-129.383	0	0	0	0	0	<Null>	0	0	0	0	0	<Null>	0	0	0	<Null>	<Null>	<Null>	0	<Null>	0	<Null>	0	<Null>	<Null>	<Null>	<Null>	<Null>	<Null>	<Null>	<Null>	Fjord Seascape - Unconsolidated sidewall	<Null>	<Null>	<Null>	Geological Survey of Canada - Pacific
862	849	Point	<Null>	<Null>	Canada West Coast	Canada West Coast_788	<Null>	<Null>	<Null>	0	<Null>	53.4062	-129.385	0	0	0	0	0	<Null>	0	0	0	0	0	<Null>	0	0	0	<Null>	<Null>	<Null>	0	<Null>	0	<Null>	0	<Null>	<Null>	<Null>	<Null>	<Null>	<Null>	<Null>	<Null>	Fjord Seascape - Unconsolidated sidewall	<Null>	<Null>	<Null>	Geological Survey of Canada - Pacific
701	850	Point	<Null>	<Null>	Canada West Coast	Canada West Coast_789	<Null>	<Null>	<Null>	0	<Null>	53.3854	-129.35	0	0	0	0	0	<Null>	0	0	0	0	0	<Null>	0	0	0	<Null>	<Null>	<Null>	0	<Null>	0	<Null>	0	<Null>	<Null>	<Null>	<Null>	<Null>	<Null>	<Null>	<Null>	Fjord Seascape - Unconsolidated sidewall	<Null>	<Null>	<Null>	Geological Survey of Canada - Pacific
702	851	Point	<Null>	<Null>	Canada West Coast	Canada West Coast_790	<Null>	<Null>	<Null>	0	<Null>	53.388	-129.354	0	0	0	0	0	<Null>	0	0	0	0	0	<Null>	0	0	0	<Null>	<Null>	<Null>	0	<Null>	0	<Null>	0	<Null>	<Null>	<Null>	<Null>	<Null>	<Null>	<Null>	<Null>	Fjord Seascape - Unconsolidated sidewall	<Null>	<Null>	<Null>	Geological Survey of Canada - Pacific
703	852	Point	<Null>	<Null>	Canada West Coast	Canada West Coast_791	<Null>	<Null>	<Null>	0	<Null>	53.3891	-129.357	0	0	0	0	0	<Null>	0	0	0	0	0	<Null>	0	0	0	<Null>	<Null>	<Null>	0	<Null>	0	<Null>	0	<Null>	<Null>	<Null>	<Null>	<Null>	<Null>	<Null>	<Null>	Fjord Seascape - Unconsolidated sidewall	<Null>	<Null>	<Null>	Geological Survey of Canada - Pacific
704	853	Point	<Null>	<Null>	Canada West Coast	Canada West Coast_792	<Null>	<Null>	<Null>	0	<Null>	53.3907	-129.358	0	0	0	0	0	<Null>	0	0	0	0	0	<Null>	0	0	0	<Null>	<Null>	<Null>	0	<Null>	0	<Null>	0	<Null>	<Null>	<Null>	<Null>	<Null>	<Null>	<Null>	<Null>	Fjord Seascape - Bedrock sidewall	<Null>	<Null>	<Null>	Geological Survey of Canada - Pacific
705	854	Point	<Null>	<Null>	Canada West Coast	Canada West Coast_793	<Null>	<Null>	<Null>	0	<Null>	53.3941	-129.363	0	0	0	0	0	<Null>	0	0	0	0	0	<Null>	0	0	0	<Null>	<Null>	<Null>	0	<Null>	0	<Null>	0	<Null>	<Null>	<Null>	<Null>	<Null>	<Null>	<Null>	<Null>	Fjord Seascape - Bedrock sidewall	<Null>	<Null>	<Null>	Geological Survey of Canada - Pacific
706	855	Point	<Null>	<Null>	Canada West Coast	Canada West Coast_794	<Null>	<Null>	<Null>	0	<Null>	53.3929	-129.362	0	0	0	0	0	<Null>	0	0	0	0	0	<Null>	0	0	0	<Null>	<Null>	<Null>	0	<Null>	0	<Null>	0	<Null>	<Null>	<Null>	<Null>	<Null>	<Null>	<Null>	<Null>	Fjord Seascape - Bedrock sidewall	<Null>	<Null>	<Null>	Geological Survey of Canada - Pacific
707	856	Point	<Null>	<Null>	Canada West Coast	Canada West Coast_795	<Null>	<Null>	<Null>	0	<Null>	54.0735	-130.249	0	0	0	0	0	<Null>	0	0	0	0	0	<Null>	0	0	0	<Null>	<Null>	<Null>	0	<Null>	0	<Null>	0	<Null>	<Null>	<Null>	<Null>	<Null>	<Null>	<Null>	<Null>	<Null>	<Null>	<Null>	<Null>	Geological Survey of Canada - Pacific
708	857	Point	<Null>	<Null>	Canada West Coast	Canada West Coast_796	<Null>	<Null>	<Null>	0	<Null>	54.1233	-130.284	0	0	0	0	0	<Null>	0	0	0	0	0	<Null>	0	0	0	<Null>	<Null>	<Null>	0	<Null>	0	<Null>	0	<Null>	<Null>	<Null>	<Null>	<Null>	<Null>	<Null>	<Null>	<Null>	<Null>	<Null>	<Null>	Geological Survey of Canada - Pacific
709	858	Point	<Null>	<Null>	Canada West Coast	Canada West Coast_797	<Null>	<Null>	<Null>	0	<Null>	54.11	-130.27	0	0	0	0	0	<Null>	0	0	0	0	0	<Null>	0	0	0	<Null>	<Null>	<Null>	0	<Null>	0	<Null>	0	<Null>	<Null>	<Null>	<Null>	<Null>	<Null>	<Null>	<Null>	<Null>	<Null>	<Null>	<Null>	Geological Survey of Canada - Pacific
710	859	Point	<Null>	<Null>	Canada West Coast	Canada West Coast_798	<Null>	<Null>	<Null>	0	<Null>	54.1845	-130.517	0	0	0	0	0	<Null>	0	0	0	0	0	<Null>	0	0	0	<Null>	<Null>	<Null>	0	<Null>	0	<Null>	0	<Null>	<Null>	<Null>	<Null>	<Null>	<Null>	<Null>	<Null>	<Null>	<Null>	<Null>	<Null>	Geological Survey of Canada - Pacific
711	860	Point	<Null>	<Null>	Canada West Coast	Canada West Coast_799	<Null>	<Null>	<Null>	0	<Null>	50.8905	-127.918	0	0	0	0	0	<Null>	0	0	0	0	0	<Null>	0	0	0	<Null>	<Null>	<Null>	0	<Null>	0	<Null>	0	<Null>	<Null>	<Null>	<Null>	<Null>	<Null>	<Null>	<Null>	<Null>	<Null>	<Null>	<Null>	Geological Survey of Canada - Pacific
712	861	Point	<Null>	<Null>	Canada West Coast	Canada West Coast_800	<Null>	<Null>	<Null>	0	<Null>	50.8892	-127.914	0	0	0	0	0	<Null>	0	0	0	0	0	<Null>	0	0	0	<Null>	<Null>	<Null>	0	<Null>	0	<Null>	0	<Null>	<Null>	<Null>	<Null>	<Null>	<Null>	<Null>	<Null>	<Null>	<Null>	<Null>	<Null>	Geological Survey of Canada - Pacific
713	862	Point	<Null>	<Null>	Canada West Coast	Canada West Coast_801	<Null>	<Null>	<Null>	0	<Null>	50.8891	-127.91	0	0	0	0	0	<Null>	0	0	0	0	0	<Null>	0	0	0	<Null>	<Null>	<Null>	0	<Null>	0	<Null>	0	<Null>	<Null>	<Null>	<Null>	<Null>	<Null>	<Null>	<Null>	<Null>	<Null>	<Null>	<Null>	Geological Survey of Canada - Pacific
863	863	Point	<Null>	<Null>	Canada West Coast	Canada West Coast_802	<Null>	<Null>	<Null>	0	<Null>	50.8899	-127.907	0	0	0	0	0	<Null>	0	0	0	0	0	<Null>	0	0	0	<Null>	<Null>	<Null>	0	<Null>	0	<Null>	0	<Null>	<Null>	<Null>	<Null>	<Null>	<Null>	<Null>	<Null>	<Null>	<Null>	<Null>	<Null>	Geological Survey of Canada - Pacific
864	864	Point	<Null>	<Null>	Canada West Coast	Canada West Coast_803	<Null>	<Null>	<Null>	0	<Null>	50.8887	-127.905	0	0	0	0	0	<Null>	0	0	0	0	0	<Null>	0	0	0	<Null>	<Null>	<Null>	0	<Null>	0	<Null>	0	<Null>	<Null>	<Null>	<Null>	<Null>	<Null>	<Null>	<Null>	<Null>	<Null>	<Null>	<Null>	Geological Survey of Canada - Pacific
865	865	Point	<Null>	<Null>	Canada West Coast	Canada West Coast_804	<Null>	<Null>	<Null>	0	<Null>	50.8845	-127.868	0	0	0	0	0	<Null>	0	0	0	0	0	<Null>	0	0	0	<Null>	<Null>	<Null>	0	<Null>	0	<Null>	0	<Null>	<Null>	<Null>	<Null>	<Null>	<Null>	<Null>	<Null>	<Null>	<Null>	<Null>	<Null>	Geological Survey of Canada - Pacific
866	866	Point	<Null>	<Null>	Canada West Coast	Canada West Coast_805	<Null>	<Null>	<Null>	0	<Null>	50.8517	-127.753	0	0	0	0	0	<Null>	0	0	0	0	0	<Null>	0	0	0	<Null>	<Null>	<Null>	0	<Null>	0	<Null>	0	<Null>	<Null>	<Null>	<Null>	<Null>	<Null>	<Null>	<Null>	<Null>	<Null>	<Null>	<Null>	Geological Survey of Canada - Pacific
867	867	Point	<Null>	<Null>	Canada West Coast	Canada West Coast_806	<Null>	<Null>	<Null>	0	<Null>	50.8552	-127.771	0	0	0	0	0	<Null>	0	0	0	0	0	<Null>	0	0	0	<Null>	<Null>	<Null>	0	<Null>	0	<Null>	0	<Null>	<Null>	<Null>	<Null>	<Null>	<Null>	<Null>	<Null>	<Null>	<Null>	<Null>	<Null>	Geological Survey of Canada - Pacific
868	868	Point	<Null>	<Null>	Canada West Coast	Canada West Coast_807	<Null>	<Null>	<Null>	0	<Null>	50.8551	-127.769	0	0	0	0	0	<Null>	0	0	0	0	0	<Null>	0	0	0	<Null>	<Null>	<Null>	0	<Null>	0	<Null>	0	<Null>	<Null>	<Null>	<Null>	<Null>	<Null>	<Null>	<Null>	<Null>	<Null>	<Null>	<Null>	Geological Survey of Canada - Pacific
869	869	Point	<Null>	<Null>	Canada West Coast	Canada West Coast_808	<Null>	<Null>	<Null>	0	<Null>	50.8545	-127.763	0	0	0	0	0	<Null>	0	0	0	0	0	<Null>	0	0	0	<Null>	<Null>	<Null>	0	<Null>	0	<Null>	0	<Null>	<Null>	<Null>	<Null>	<Null>	<Null>	<Null>	<Null>	<Null>	<Null>	<Null>	<Null>	Geological Survey of Canada - Pacific
870	870	Point	<Null>	<Null>	Canada West Coast	Canada West Coast_809	<Null>	<Null>	<Null>	0	<Null>	50.8537	-127.761	0	0	0	0	0	<Null>	0	0	0	0	0	<Null>	0	0	0	<Null>	<Null>	<Null>	0	<Null>	0	<Null>	0	<Null>	<Null>	<Null>	<Null>	<Null>	<Null>	<Null>	<Null>	<Null>	<Null>	<Null>	<Null>	Geological Survey of Canada - Pacific
871	871	Point	<Null>	<Null>	Canada West Coast	Canada West Coast_810	<Null>	<Null>	<Null>	0	<Null>	50.8578	-127.783	0	0	0	0	0	<Null>	0	0	0	0	0	<Null>	0	0	0	<Null>	<Null>	<Null>	0	<Null>	0	<Null>	0	<Null>	<Null>	<Null>	<Null>	<Null>	<Null>	<Null>	<Null>	<Null>	<Null>	<Null>	<Null>	Geological Survey of Canada - Pacific
872	872	Point	<Null>	<Null>	Canada West Coast	Canada West Coast_811	<Null>	<Null>	<Null>	0	<Null>	50.8115	-127.593	0	0	0	0	0	<Null>	0	0	0	0	0	<Null>	0	0	0	<Null>	<Null>	<Null>	0	<Null>	0	<Null>	0	<Null>	<Null>	<Null>	<Null>	<Null>	<Null>	<Null>	<Null>	<Null>	<Null>	<Null>	<Null>	Geological Survey of Canada - Pacific
873	873	Point	<Null>	<Null>	Canada West Coast	Canada West Coast_812	<Null>	<Null>	<Null>	0	<Null>	50.8081	-127.568	0	0	0	0	0	<Null>	0	0	0	0	0	<Null>	0	0	0	<Null>	<Null>	<Null>	0	<Null>	0	<Null>	0	<Null>	<Null>	<Null>	<Null>	<Null>	<Null>	<Null>	<Null>	<Null>	<Null>	<Null>	<Null>	Geological Survey of Canada - Pacific
874	874	Point	<Null>	<Null>	Canada West Coast	Canada West Coast_813	<Null>	<Null>	<Null>	0	<Null>	50.7965	-127.496	0	0	0	0	0	<Null>	0	0	0	0	0	<Null>	0	0	0	<Null>	<Null>	<Null>	0	<Null>	0	<Null>	0	<Null>	<Null>	<Null>	<Null>	<Null>	<Null>	<Null>	<Null>	<Null>	<Null>	<Null>	<Null>	Geological Survey of Canada - Pacific
875	875	Point	<Null>	<Null>	Canada West Coast	Canada West Coast_814	<Null>	<Null>	<Null>	0	<Null>	51.1164	-127.15	0	0	0	0	0	<Null>	0	0	0	0	0	<Null>	0	0	0	<Null>	<Null>	<Null>	0	<Null>	0	<Null>	0	<Null>	<Null>	<Null>	<Null>	<Null>	<Null>	<Null>	<Null>	<Null>	<Null>	<Null>	<Null>	Geological Survey of Canada - Pacific
876	876	Point	<Null>	<Null>	Canada West Coast	Canada West Coast_815	<Null>	<Null>	<Null>	0	<Null>	51.1302	-127.21	0	0	0	0	0	<Null>	0	0	0	0	0	<Null>	0	0	0	<Null>	<Null>	<Null>	0	<Null>	0	<Null>	0	<Null>	<Null>	<Null>	<Null>	<Null>	<Null>	<Null>	<Null>	<Null>	<Null>	<Null>	<Null>	Geological Survey of Canada - Pacific
877	877	Point	<Null>	<Null>	Canada West Coast	Canada West Coast_816	<Null>	<Null>	<Null>	0	<Null>	51.131	-127.215	0	0	0	0	0	<Null>	0	0	0	0	0	<Null>	0	0	0	<Null>	<Null>	<Null>	0	<Null>	0	<Null>	0	<Null>	<Null>	<Null>	<Null>	<Null>	<Null>	<Null>	<Null>	<Null>	<Null>	<Null>	<Null>	Geological Survey of Canada - Pacific
878	878	Point	<Null>	<Null>	Canada West Coast	Canada West Coast_817	<Null>	<Null>	<Null>	0	<Null>	51.1314	-127.246	0	0	0	0	0	<Null>	0	0	0	0	0	<Null>	0	0	0	<Null>	<Null>	<Null>	0	<Null>	0	<Null>	0	<Null>	<Null>	<Null>	<Null>	<Null>	<Null>	<Null>	<Null>	<Null>	<Null>	<Null>	<Null>	Geological Survey of Canada - Pacific
879	879	Point	<Null>	<Null>	Canada West Coast	Canada West Coast_818	<Null>	<Null>	<Null>	0	<Null>	51.1046	-126.955	0	0	0	0	0	<Null>	0	0	0	0	0	<Null>	0	0	0	<Null>	<Null>	<Null>	0	<Null>	0	<Null>	0	<Null>	<Null>	<Null>	<Null>	<Null>	<Null>	<Null>	<Null>	<Null>	<Null>	<Null>	<Null>	Geological Survey of Canada - Pacific
880	880	Point	<Null>	<Null>	Canada West Coast	Canada West Coast_819	<Null>	<Null>	<Null>	0	<Null>	51.1043	-126.951	0	0	0	0	0	<Null>	0	0	0	0	0	<Null>	0	0	0	<Null>	<Null>	<Null>	0	<Null>	0	<Null>	0	<Null>	<Null>	<Null>	<Null>	<Null>	<Null>	<Null>	<Null>	<Null>	<Null>	<Null>	<Null>	Geological Survey of Canada - Pacific
881	881	Point	<Null>	<Null>	Canada West Coast	Canada West Coast_820	<Null>	<Null>	<Null>	0	<Null>	51.1058	-126.972	0	0	0	0	0	<Null>	0	0	0	0	0	<Null>	0	0	0	<Null>	<Null>	<Null>	0	<Null>	0	<Null>	0	<Null>	<Null>	<Null>	<Null>	<Null>	<Null>	<Null>	<Null>	<Null>	<Null>	<Null>	<Null>	Geological Survey of Canada - Pacific
882	882	Point	<Null>	<Null>	Canada West Coast	Canada West Coast_821	<Null>	<Null>	<Null>	0	<Null>	51.1239	-127.147	0	0	0	0	0	<Null>	0	0	0	0	0	<Null>	0	0	0	<Null>	<Null>	<Null>	0	<Null>	0	<Null>	0	<Null>	<Null>	<Null>	<Null>	<Null>	<Null>	<Null>	<Null>	<Null>	<Null>	<Null>	<Null>	Geological Survey of Canada - Pacific
883	883	Point	<Null>	<Null>	Canada West Coast	Canada West Coast_822	<Null>	<Null>	<Null>	0	<Null>	51.1276	-127.171	0	0	0	0	0	<Null>	0	0	0	0	0	<Null>	0	0	0	<Null>	<Null>	<Null>	0	<Null>	0	<Null>	0	<Null>	<Null>	<Null>	<Null>	<Null>	<Null>	<Null>	<Null>	<Null>	<Null>	<Null>	<Null>	Geological Survey of Canada - Pacific
884	884	Point	<Null>	<Null>	Canada West Coast	Canada West Coast_823	<Null>	<Null>	<Null>	0	<Null>	51.171	-127.073	0	0	0	0	0	<Null>	0	0	0	0	0	<Null>	0	0	0	<Null>	<Null>	<Null>	0	<Null>	0	<Null>	0	<Null>	<Null>	<Null>	<Null>	<Null>	<Null>	<Null>	<Null>	<Null>	<Null>	<Null>	<Null>	Geological Survey of Canada - Pacific
885	885	Point	<Null>	<Null>	Canada West Coast	Canada West Coast_824	<Null>	<Null>	<Null>	0	<Null>	51.1707	-127.069	0	0	0	0	0	<Null>	0	0	0	0	0	<Null>	0	0	0	<Null>	<Null>	<Null>	0	<Null>	0	<Null>	0	<Null>	<Null>	<Null>	<Null>	<Null>	<Null>	<Null>	<Null>	<Null>	<Null>	<Null>	<Null>	Geological Survey of Canada - Pacific
886	886	Point	<Null>	<Null>	Canada West Coast	Canada West Coast_825	<Null>	<Null>	<Null>	0	<Null>	51.1707	-127.065	0	0	0	0	0	<Null>	0	0	0	0	0	<Null>	0	0	0	<Null>	<Null>	<Null>	0	<Null>	0	<Null>	0	<Null>	<Null>	<Null>	<Null>	<Null>	<Null>	<Null>	<Null>	<Null>	<Null>	<Null>	<Null>	Geological Survey of Canada - Pacific
887	887	Point	<Null>	<Null>	Canada West Coast	Canada West Coast_826	<Null>	<Null>	<Null>	0	<Null>	51.1715	-127.054	0	0	0	0	0	<Null>	0	0	0	0	0	<Null>	0	0	0	<Null>	<Null>	<Null>	0	<Null>	0	<Null>	0	<Null>	<Null>	<Null>	<Null>	<Null>	<Null>	<Null>	<Null>	<Null>	<Null>	<Null>	<Null>	Geological Survey of Canada - Pacific
888	888	Point	<Null>	<Null>	Canada West Coast	Canada West Coast_827	<Null>	<Null>	<Null>	0	<Null>	51.1723	-127.05	0	0	0	0	0	<Null>	0	0	0	0	0	<Null>	0	0	0	<Null>	<Null>	<Null>	0	<Null>	0	<Null>	0	<Null>	<Null>	<Null>	<Null>	<Null>	<Null>	<Null>	<Null>	<Null>	<Null>	<Null>	<Null>	Geological Survey of Canada - Pacific
889	889	Point	<Null>	<Null>	Canada West Coast	Canada West Coast_828	<Null>	<Null>	<Null>	0	<Null>	51.1709	-127.061	0	0	0	0	0	<Null>	0	0	0	0	0	<Null>	0	0	0	<Null>	<Null>	<Null>	0	<Null>	0	<Null>	0	<Null>	<Null>	<Null>	<Null>	<Null>	<Null>	<Null>	<Null>	<Null>	<Null>	<Null>	<Null>	Geological Survey of Canada - Pacific
890	890	Point	<Null>	<Null>	Canada West Coast	Canada West Coast_829	<Null>	<Null>	<Null>	0	<Null>	51.1645	-126.985	0	0	0	0	0	<Null>	0	0	0	0	0	<Null>	0	0	0	<Null>	<Null>	<Null>	0	<Null>	0	<Null>	0	<Null>	<Null>	<Null>	<Null>	<Null>	<Null>	<Null>	<Null>	<Null>	<Null>	<Null>	<Null>	Geological Survey of Canada - Pacific
891	891	Point	<Null>	<Null>	Canada West Coast	Canada West Coast_830	<Null>	<Null>	<Null>	0	<Null>	51.1657	-126.975	0	0	0	0	0	<Null>	0	0	0	0	0	<Null>	0	0	0	<Null>	<Null>	<Null>	0	<Null>	0	<Null>	0	<Null>	<Null>	<Null>	<Null>	<Null>	<Null>	<Null>	<Null>	<Null>	<Null>	<Null>	<Null>	Geological Survey of Canada - Pacific
892	892	Point	<Null>	<Null>	Canada West Coast	Canada West Coast_831	<Null>	<Null>	<Null>	0	<Null>	51.1655	-126.968	0	0	0	0	0	<Null>	0	0	0	0	0	<Null>	0	0	0	<Null>	<Null>	<Null>	0	<Null>	0	<Null>	0	<Null>	<Null>	<Null>	<Null>	<Null>	<Null>	<Null>	<Null>	<Null>	<Null>	<Null>	<Null>	Geological Survey of Canada - Pacific
893	893	Point	<Null>	<Null>	Canada West Coast	Canada West Coast_832	<Null>	<Null>	<Null>	0	<Null>	51.1633	-126.955	0	0	0	0	0	<Null>	0	0	0	0	0	<Null>	0	0	0	<Null>	<Null>	<Null>	0	<Null>	0	<Null>	0	<Null>	<Null>	<Null>	<Null>	<Null>	<Null>	<Null>	<Null>	<Null>	<Null>	<Null>	<Null>	Geological Survey of Canada - Pacific
894	894	Point	<Null>	<Null>	Canada West Coast	Canada West Coast_833	<Null>	<Null>	<Null>	0	<Null>	51.1636	-126.948	0	0	0	0	0	<Null>	0	0	0	0	0	<Null>	0	0	0	<Null>	<Null>	<Null>	0	<Null>	0	<Null>	0	<Null>	<Null>	<Null>	<Null>	<Null>	<Null>	<Null>	<Null>	<Null>	<Null>	<Null>	<Null>	Geological Survey of Canada - Pacific
895	895	Point	<Null>	<Null>	Canada West Coast	Canada West Coast_834	<Null>	<Null>	<Null>	0	<Null>	51.1636	-126.966	0	0	0	0	0	<Null>	0	0	0	0	0	<Null>	0	0	0	<Null>	<Null>	<Null>	0	<Null>	0	<Null>	0	<Null>	<Null>	<Null>	<Null>	<Null>	<Null>	<Null>	<Null>	<Null>	<Null>	<Null>	<Null>	Geological Survey of Canada - Pacific
896	896	Point	<Null>	<Null>	Canada West Coast	Canada West Coast_835	<Null>	<Null>	<Null>	0	<Null>	51.1689	-126.948	0	0	0	0	0	<Null>	0	0	0	0	0	<Null>	0	0	0	<Null>	<Null>	<Null>	0	<Null>	0	<Null>	0	<Null>	<Null>	<Null>	<Null>	<Null>	<Null>	<Null>	<Null>	<Null>	<Null>	<Null>	<Null>	Geological Survey of Canada - Pacific
897	897	Point	<Null>	<Null>	Canada West Coast	Canada West Coast_836	<Null>	<Null>	<Null>	0	<Null>	51.1674	-126.956	0	0	0	0	0	<Null>	0	0	0	0	0	<Null>	0	0	0	<Null>	<Null>	<Null>	0	<Null>	0	<Null>	0	<Null>	<Null>	<Null>	<Null>	<Null>	<Null>	<Null>	<Null>	<Null>	<Null>	<Null>	<Null>	Geological Survey of Canada - Pacific
898	898	Point	<Null>	<Null>	Canada West Coast	Canada West Coast_837	<Null>	<Null>	<Null>	0	<Null>	51.1794	-126.921	0	0	0	0	0	<Null>	0	0	0	0	0	<Null>	0	0	0	<Null>	<Null>	<Null>	0	<Null>	0	<Null>	0	<Null>	<Null>	<Null>	<Null>	<Null>	<Null>	<Null>	<Null>	<Null>	<Null>	<Null>	<Null>	Geological Survey of Canada - Pacific
899	899	Point	<Null>	<Null>	Canada West Coast	Canada West Coast_838	<Null>	<Null>	<Null>	0	<Null>	51.167	-127.108	0	0	0	0	0	<Null>	0	0	0	0	0	<Null>	0	0	0	<Null>	<Null>	<Null>	0	<Null>	0	<Null>	0	<Null>	<Null>	<Null>	<Null>	<Null>	<Null>	<Null>	<Null>	<Null>	<Null>	<Null>	<Null>	Geological Survey of Canada - Pacific
900	900	Point	<Null>	<Null>	Canada West Coast	Canada West Coast_839	<Null>	<Null>	<Null>	0	<Null>	51.1649	-127.096	0	0	0	0	0	<Null>	0	0	0	0	0	<Null>	0	0	0	<Null>	<Null>	<Null>	0	<Null>	0	<Null>	0	<Null>	<Null>	<Null>	<Null>	<Null>	<Null>	<Null>	<Null>	<Null>	<Null>	<Null>	<Null>	Geological Survey of Canada - Pacific
901	901	Point	<Null>	<Null>	Canada West Coast	Canada West Coast_840	<Null>	<Null>	<Null>	0	<Null>	51.1265	-127.276	0	0	0	0	0	<Null>	0	0	0	0	0	<Null>	0	0	0	<Null>	<Null>	<Null>	0	<Null>	0	<Null>	0	<Null>	<Null>	<Null>	<Null>	<Null>	<Null>	<Null>	<Null>	<Null>	<Null>	<Null>	<Null>	Geological Survey of Canada - Pacific
902	902	Point	<Null>	<Null>	Canada West Coast	Canada West Coast_841	<Null>	<Null>	<Null>	0	<Null>	51.1351	-127.333	0	0	0	0	0	<Null>	0	0	0	0	0	<Null>	0	0	0	<Null>	<Null>	<Null>	0	<Null>	0	<Null>	0	<Null>	<Null>	<Null>	<Null>	<Null>	<Null>	<Null>	<Null>	<Null>	<Null>	<Null>	<Null>	Geological Survey of Canada - Pacific
903	903	Point	<Null>	<Null>	Canada West Coast	Canada West Coast_842	<Null>	<Null>	<Null>	0	<Null>	51.1301	-127.315	0	0	0	0	0	<Null>	0	0	0	0	0	<Null>	0	0	0	<Null>	<Null>	<Null>	0	<Null>	0	<Null>	0	<Null>	<Null>	<Null>	<Null>	<Null>	<Null>	<Null>	<Null>	<Null>	<Null>	<Null>	<Null>	Geological Survey of Canada - Pacific
904	904	Point	<Null>	<Null>	Canada West Coast	Canada West Coast_843	<Null>	<Null>	<Null>	0	<Null>	51.0673	-127.057	0	0	0	0	0	<Null>	0	0	0	0	0	<Null>	0	0	0	<Null>	<Null>	<Null>	0	<Null>	0	<Null>	0	<Null>	<Null>	<Null>	<Null>	<Null>	<Null>	<Null>	<Null>	<Null>	<Null>	<Null>	<Null>	Geological Survey of Canada - Pacific
905	905	Point	<Null>	<Null>	Canada West Coast	Canada West Coast_844	<Null>	<Null>	<Null>	0	<Null>	51.0661	-126.845	0	0	0	0	0	<Null>	0	0	0	0	0	<Null>	0	0	0	<Null>	<Null>	<Null>	0	<Null>	0	<Null>	0	<Null>	<Null>	<Null>	<Null>	<Null>	<Null>	<Null>	<Null>	<Null>	<Null>	<Null>	<Null>	Geological Survey of Canada - Pacific
906	906	Point	<Null>	<Null>	Canada West Coast	Canada West Coast_845	<Null>	<Null>	<Null>	0	<Null>	51.0661	-126.837	0	0	0	0	0	<Null>	0	0	0	0	0	<Null>	0	0	0	<Null>	<Null>	<Null>	0	<Null>	0	<Null>	0	<Null>	<Null>	<Null>	<Null>	<Null>	<Null>	<Null>	<Null>	<Null>	<Null>	<Null>	<Null>	Geological Survey of Canada - Pacific
907	907	Point	<Null>	<Null>	Canada West Coast	Canada West Coast_846	<Null>	<Null>	<Null>	0	<Null>	51.0609	-126.748	0	0	0	0	0	<Null>	0	0	0	0	0	<Null>	0	0	0	<Null>	<Null>	<Null>	0	<Null>	0	<Null>	0	<Null>	<Null>	<Null>	<Null>	<Null>	<Null>	<Null>	<Null>	<Null>	<Null>	<Null>	<Null>	Geological Survey of Canada - Pacific
908	908	Point	<Null>	<Null>	Canada West Coast	Canada West Coast_847	<Null>	<Null>	<Null>	0	<Null>	51.0555	-126.743	0	0	0	0	0	<Null>	0	0	0	0	0	<Null>	0	0	0	<Null>	<Null>	<Null>	0	<Null>	0	<Null>	0	<Null>	<Null>	<Null>	<Null>	<Null>	<Null>	<Null>	<Null>	<Null>	<Null>	<Null>	<Null>	Geological Survey of Canada - Pacific
909	909	Point	<Null>	<Null>	Canada West Coast	Canada West Coast_848	<Null>	<Null>	<Null>	0	<Null>	51.0506	-126.739	0	0	0	0	0	<Null>	0	0	0	0	0	<Null>	0	0	0	<Null>	<Null>	<Null>	0	<Null>	0	<Null>	0	<Null>	<Null>	<Null>	<Null>	<Null>	<Null>	<Null>	<Null>	<Null>	<Null>	<Null>	<Null>	Geological Survey of Canada - Pacific
910	910	Point	<Null>	<Null>	Canada West Coast	Canada West Coast_849	<Null>	<Null>	<Null>	0	<Null>	51.0471	-126.736	0	0	0	0	0	<Null>	0	0	0	0	0	<Null>	0	0	0	<Null>	<Null>	<Null>	0	<Null>	0	<Null>	0	<Null>	<Null>	<Null>	<Null>	<Null>	<Null>	<Null>	<Null>	<Null>	<Null>	<Null>	<Null>	Geological Survey of Canada - Pacific
911	911	Point	<Null>	<Null>	Canada West Coast	Canada West Coast_850	<Null>	<Null>	<Null>	0	<Null>	51.0357	-126.727	0	0	0	0	0	<Null>	0	0	0	0	0	<Null>	0	0	0	<Null>	<Null>	<Null>	0	<Null>	0	<Null>	0	<Null>	<Null>	<Null>	<Null>	<Null>	<Null>	<Null>	<Null>	<Null>	<Null>	<Null>	<Null>	Geological Survey of Canada - Pacific
912	912	Point	<Null>	<Null>	Canada West Coast	Canada West Coast_851	<Null>	<Null>	<Null>	0	<Null>	51.0428	-126.732	0	0	0	0	0	<Null>	0	0	0	0	0	<Null>	0	0	0	<Null>	<Null>	<Null>	0	<Null>	0	<Null>	0	<Null>	<Null>	<Null>	<Null>	<Null>	<Null>	<Null>	<Null>	<Null>	<Null>	<Null>	<Null>	Geological Survey of Canada - Pacific
913	913	Point	<Null>	<Null>	Canada West Coast	Canada West Coast_852	<Null>	<Null>	<Null>	0	<Null>	51.0444	-126.734	0	0	0	0	0	<Null>	0	0	0	0	0	<Null>	0	0	0	<Null>	<Null>	<Null>	0	<Null>	0	<Null>	0	<Null>	<Null>	<Null>	<Null>	<Null>	<Null>	<Null>	<Null>	<Null>	<Null>	<Null>	<Null>	Geological Survey of Canada - Pacific
914	914	Point	<Null>	<Null>	Canada West Coast	Canada West Coast_853	<Null>	<Null>	<Null>	0	<Null>	51.0462	-126.67	0	0	0	0	0	<Null>	0	0	0	0	0	<Null>	0	0	0	<Null>	<Null>	<Null>	0	<Null>	0	<Null>	0	<Null>	<Null>	<Null>	<Null>	<Null>	<Null>	<Null>	<Null>	<Null>	<Null>	<Null>	<Null>	Geological Survey of Canada - Pacific
915	915	Point	<Null>	<Null>	Canada West Coast	Canada West Coast_854	<Null>	<Null>	<Null>	0	<Null>	51.0478	-126.691	0	0	0	0	0	<Null>	0	0	0	0	0	<Null>	0	0	0	<Null>	<Null>	<Null>	0	<Null>	0	<Null>	0	<Null>	<Null>	<Null>	<Null>	<Null>	<Null>	<Null>	<Null>	<Null>	<Null>	<Null>	<Null>	Geological Survey of Canada - Pacific
916	916	Point	<Null>	<Null>	Canada West Coast	Canada West Coast_855	<Null>	<Null>	<Null>	0	<Null>	51.0457	-126.71	0	0	0	0	0	<Null>	0	0	0	0	0	<Null>	0	0	0	<Null>	<Null>	<Null>	0	<Null>	0	<Null>	0	<Null>	<Null>	<Null>	<Null>	<Null>	<Null>	<Null>	<Null>	<Null>	<Null>	<Null>	<Null>	Geological Survey of Canada - Pacific
917	917	Point	<Null>	<Null>	Canada West Coast	Canada West Coast_856	<Null>	<Null>	<Null>	0	<Null>	51.0479	-126.703	0	0	0	0	0	<Null>	0	0	0	0	0	<Null>	0	0	0	<Null>	<Null>	<Null>	0	<Null>	0	<Null>	0	<Null>	<Null>	<Null>	<Null>	<Null>	<Null>	<Null>	<Null>	<Null>	<Null>	<Null>	<Null>	Geological Survey of Canada - Pacific
918	918	Point	<Null>	<Null>	Canada West Coast	Canada West Coast_857	<Null>	<Null>	<Null>	0	<Null>	51.0425	-126.68	0	0	0	0	0	<Null>	0	0	0	0	0	<Null>	0	0	0	<Null>	<Null>	<Null>	0	<Null>	0	<Null>	0	<Null>	<Null>	<Null>	<Null>	<Null>	<Null>	<Null>	<Null>	<Null>	<Null>	<Null>	<Null>	Geological Survey of Canada - Pacific
919	919	Point	<Null>	<Null>	Canada West Coast	Canada West Coast_858	<Null>	<Null>	<Null>	0	<Null>	51.0278	-126.723	0	0	0	0	0	<Null>	0	0	0	0	0	<Null>	0	0	0	<Null>	<Null>	<Null>	0	<Null>	0	<Null>	0	<Null>	<Null>	<Null>	<Null>	<Null>	<Null>	<Null>	<Null>	<Null>	<Null>	<Null>	<Null>	Geological Survey of Canada - Pacific
920	920	Point	<Null>	<Null>	Canada West Coast	Canada West Coast_859	<Null>	<Null>	<Null>	0	<Null>	51.0211	-126.716	0	0	0	0	0	<Null>	0	0	0	0	0	<Null>	0	0	0	<Null>	<Null>	<Null>	0	<Null>	0	<Null>	0	<Null>	<Null>	<Null>	<Null>	<Null>	<Null>	<Null>	<Null>	<Null>	<Null>	<Null>	<Null>	Geological Survey of Canada - Pacific
921	921	Point	<Null>	<Null>	Canada West Coast	Canada West Coast_860	<Null>	<Null>	<Null>	0	<Null>	51.0101	-126.713	0	0	0	0	0	<Null>	0	0	0	0	0	<Null>	0	0	0	<Null>	<Null>	<Null>	0	<Null>	0	<Null>	0	<Null>	<Null>	<Null>	<Null>	<Null>	<Null>	<Null>	<Null>	<Null>	<Null>	<Null>	<Null>	Geological Survey of Canada - Pacific
922	922	Point	<Null>	<Null>	Canada West Coast	Canada West Coast_861	<Null>	<Null>	<Null>	0	<Null>	51.0099	-126.701	0	0	0	0	0	<Null>	0	0	0	0	0	<Null>	0	0	0	<Null>	<Null>	<Null>	0	<Null>	0	<Null>	0	<Null>	<Null>	<Null>	<Null>	<Null>	<Null>	<Null>	<Null>	<Null>	<Null>	<Null>	<Null>	Geological Survey of Canada - Pacific
923	923	Point	<Null>	<Null>	Canada West Coast	Canada West Coast_862	<Null>	<Null>	<Null>	0	<Null>	51.0028	-126.701	0	0	0	0	0	<Null>	0	0	0	0	0	<Null>	0	0	0	<Null>	<Null>	<Null>	0	<Null>	0	<Null>	0	<Null>	<Null>	<Null>	<Null>	<Null>	<Null>	<Null>	<Null>	<Null>	<Null>	<Null>	<Null>	Geological Survey of Canada - Pacific
924	924	Point	<Null>	<Null>	Canada West Coast	Canada West Coast_863	<Null>	<Null>	<Null>	0	<Null>	51.003	-126.708	0	0	0	0	0	<Null>	0	0	0	0	0	<Null>	0	0	0	<Null>	<Null>	<Null>	0	<Null>	0	<Null>	0	<Null>	<Null>	<Null>	<Null>	<Null>	<Null>	<Null>	<Null>	<Null>	<Null>	<Null>	<Null>	Geological Survey of Canada - Pacific
925	925	Point	<Null>	<Null>	Canada West Coast	Canada West Coast_864	<Null>	<Null>	<Null>	0	<Null>	51.1287	-126.719	0	0	0	0	0	<Null>	0	0	0	0	0	<Null>	0	0	0	<Null>	<Null>	<Null>	0	<Null>	0	<Null>	0	<Null>	<Null>	<Null>	<Null>	<Null>	<Null>	<Null>	<Null>	<Null>	<Null>	<Null>	<Null>	Geological Survey of Canada - Pacific
926	926	Point	<Null>	<Null>	Canada West Coast	Canada West Coast_865	<Null>	<Null>	<Null>	0	<Null>	51.1371	-126.699	0	0	0	0	0	<Null>	0	0	0	0	0	<Null>	0	0	0	<Null>	<Null>	<Null>	0	<Null>	0	<Null>	0	<Null>	<Null>	<Null>	<Null>	<Null>	<Null>	<Null>	<Null>	<Null>	<Null>	<Null>	<Null>	Geological Survey of Canada - Pacific
927	927	Point	<Null>	<Null>	Canada West Coast	Canada West Coast_866	<Null>	<Null>	<Null>	0	<Null>	51.1269	-126.695	0	0	0	0	0	<Null>	0	0	0	0	0	<Null>	0	0	0	<Null>	<Null>	<Null>	0	<Null>	0	<Null>	0	<Null>	<Null>	<Null>	<Null>	<Null>	<Null>	<Null>	<Null>	<Null>	<Null>	<Null>	<Null>	Geological Survey of Canada - Pacific
928	928	Point	<Null>	<Null>	Canada West Coast	Canada West Coast_867	<Null>	<Null>	<Null>	0	<Null>	51.1543	-126.655	0	0	0	0	0	<Null>	0	0	0	0	0	<Null>	0	0	0	<Null>	<Null>	<Null>	0	<Null>	0	<Null>	0	<Null>	<Null>	<Null>	<Null>	<Null>	<Null>	<Null>	<Null>	<Null>	<Null>	<Null>	<Null>	Geological Survey of Canada - Pacific
929	929	Point	<Null>	<Null>	Canada West Coast	Canada West Coast_868	<Null>	<Null>	<Null>	0	<Null>	51.1689	-126.665	0	0	0	0	0	<Null>	0	0	0	0	0	<Null>	0	0	0	<Null>	<Null>	<Null>	0	<Null>	0	<Null>	0	<Null>	<Null>	<Null>	<Null>	<Null>	<Null>	<Null>	<Null>	<Null>	<Null>	<Null>	<Null>	Geological Survey of Canada - Pacific
930	930	Point	<Null>	<Null>	Canada West Coast	Canada West Coast_869	<Null>	<Null>	<Null>	0	<Null>	51.1858	-126.661	0	0	0	0	0	<Null>	0	0	0	0	0	<Null>	0	0	0	<Null>	<Null>	<Null>	0	<Null>	0	<Null>	0	<Null>	<Null>	<Null>	<Null>	<Null>	<Null>	<Null>	<Null>	<Null>	<Null>	<Null>	<Null>	Geological Survey of Canada - Pacific
931	931	Point	<Null>	<Null>	Canada West Coast	Canada West Coast_870	<Null>	<Null>	<Null>	0	<Null>	51.1119	-126.723	0	0	0	0	0	<Null>	0	0	0	0	0	<Null>	0	0	0	<Null>	<Null>	<Null>	0	<Null>	0	<Null>	0	<Null>	<Null>	<Null>	<Null>	<Null>	<Null>	<Null>	<Null>	<Null>	<Null>	<Null>	<Null>	Geological Survey of Canada - Pacific
932	932	Point	<Null>	<Null>	Canada West Coast	Canada West Coast_871	<Null>	<Null>	<Null>	0	<Null>	51.1012	-126.734	0	0	0	0	0	<Null>	0	0	0	0	0	<Null>	0	0	0	<Null>	<Null>	<Null>	0	<Null>	0	<Null>	0	<Null>	<Null>	<Null>	<Null>	<Null>	<Null>	<Null>	<Null>	<Null>	<Null>	<Null>	<Null>	Geological Survey of Canada - Pacific
933	933	Point	<Null>	<Null>	Canada West Coast	Canada West Coast_872	<Null>	<Null>	<Null>	0	<Null>	51.0974	-126.739	0	0	0	0	0	<Null>	0	0	0	0	0	<Null>	0	0	0	<Null>	<Null>	<Null>	0	<Null>	0	<Null>	0	<Null>	<Null>	<Null>	<Null>	<Null>	<Null>	<Null>	<Null>	<Null>	<Null>	<Null>	<Null>	Geological Survey of Canada - Pacific
934	934	Point	<Null>	<Null>	Canada West Coast	Canada West Coast_873	<Null>	<Null>	<Null>	0	<Null>	51.0907	-126.758	0	0	0	0	0	<Null>	0	0	0	0	0	<Null>	0	0	0	<Null>	<Null>	<Null>	0	<Null>	0	<Null>	0	<Null>	<Null>	<Null>	<Null>	<Null>	<Null>	<Null>	<Null>	<Null>	<Null>	<Null>	<Null>	Geological Survey of Canada - Pacific
935	935	Point	<Null>	<Null>	Canada West Coast	Canada West Coast_874	<Null>	<Null>	<Null>	0	<Null>	51.0874	-126.78	0	0	0	0	0	<Null>	0	0	0	0	0	<Null>	0	0	0	<Null>	<Null>	<Null>	0	<Null>	0	<Null>	0	<Null>	<Null>	<Null>	<Null>	<Null>	<Null>	<Null>	<Null>	<Null>	<Null>	<Null>	<Null>	Geological Survey of Canada - Pacific
936	936	Point	<Null>	<Null>	Canada West Coast	Canada West Coast_875	<Null>	<Null>	<Null>	0	<Null>	51.0966	-126.821	0	0	0	0	0	<Null>	0	0	0	0	0	<Null>	0	0	0	<Null>	<Null>	<Null>	0	<Null>	0	<Null>	0	<Null>	<Null>	<Null>	<Null>	<Null>	<Null>	<Null>	<Null>	<Null>	<Null>	<Null>	<Null>	Geological Survey of Canada - Pacific
937	937	Point	<Null>	<Null>	Canada West Coast	Canada West Coast_876	<Null>	<Null>	<Null>	0	<Null>	51.0966	-126.814	0	0	0	0	0	<Null>	0	0	0	0	0	<Null>	0	0	0	<Null>	<Null>	<Null>	0	<Null>	0	<Null>	0	<Null>	<Null>	<Null>	<Null>	<Null>	<Null>	<Null>	<Null>	<Null>	<Null>	<Null>	<Null>	Geological Survey of Canada - Pacific
938	938	Point	<Null>	<Null>	Canada West Coast	Canada West Coast_877	<Null>	<Null>	<Null>	0	<Null>	51.072	-126.898	0	0	0	0	0	<Null>	0	0	0	0	0	<Null>	0	0	0	<Null>	<Null>	<Null>	0	<Null>	0	<Null>	0	<Null>	<Null>	<Null>	<Null>	<Null>	<Null>	<Null>	<Null>	<Null>	<Null>	<Null>	<Null>	Geological Survey of Canada - Pacific
939	939	Point	<Null>	<Null>	Canada West Coast	Canada West Coast_878	<Null>	<Null>	<Null>	0	<Null>	51.1916	-127.289	0	0	0	0	0	<Null>	0	0	0	0	0	<Null>	0	0	0	<Null>	<Null>	<Null>	0	<Null>	0	<Null>	0	<Null>	<Null>	<Null>	<Null>	<Null>	<Null>	<Null>	<Null>	<Null>	<Null>	<Null>	<Null>	Geological Survey of Canada - Pacific
940	940	Point	<Null>	<Null>	Canada West Coast	Canada West Coast_879	<Null>	<Null>	<Null>	0	<Null>	53.3985	-129.372	0	0	0	0	0	<Null>	0	0	0	0	0	<Null>	0	0	0	<Null>	<Null>	<Null>	0	<Null>	0	<Null>	0	<Null>	<Null>	<Null>	<Null>	<Null>	<Null>	<Null>	<Null>	Fjord Seascape - Bedrock sidewall	<Null>	<Null>	<Null>	Geological Survey of Canada - Pacific
941	941	Point	<Null>	<Null>	Canada West Coast	Canada West Coast_880	<Null>	<Null>	<Null>	0	<Null>	53.4504	-129.46	0	0	0	0	0	<Null>	0	0	0	0	0	<Null>	0	0	0	<Null>	<Null>	<Null>	0	<Null>	0	<Null>	0	<Null>	<Null>	<Null>	<Null>	<Null>	<Null>	<Null>	<Null>	Fjord Seascape - Bedrock sidewall	<Null>	<Null>	<Null>	Geological Survey of Canada - Pacific
942	942	Point	<Null>	<Null>	Canada West Coast	Canada West Coast_881	<Null>	<Null>	<Null>	0	<Null>	53.4949	-129.528	0	0	0	0	0	<Null>	0	0	0	0	0	<Null>	0	0	0	<Null>	<Null>	<Null>	0	<Null>	0	<Null>	0	<Null>	<Null>	<Null>	<Null>	<Null>	<Null>	<Null>	<Null>	Fjord Seascape - Unconsolidated sidewall	<Null>	<Null>	<Null>	Geological Survey of Canada - Pacific
943	943	Point	<Null>	<Null>	Canada West Coast	Canada West Coast_882	<Null>	<Null>	<Null>	0	<Null>	53.4992	-129.534	0	0	0	0	0	<Null>	0	0	0	0	0	<Null>	0	0	0	<Null>	<Null>	<Null>	0	<Null>	0	<Null>	0	<Null>	<Null>	<Null>	<Null>	<Null>	<Null>	<Null>	<Null>	Fjord Seascape - Unconsolidated sidewall	<Null>	<Null>	<Null>	Geological Survey of Canada - Pacific
944	944	Point	<Null>	<Null>	Canada West Coast	Canada West Coast_883	<Null>	<Null>	<Null>	0	<Null>	53.5016	-129.538	0	0	0	0	0	<Null>	0	0	0	0	0	<Null>	0	0	0	<Null>	<Null>	<Null>	0	<Null>	0	<Null>	0	<Null>	<Null>	<Null>	<Null>	<Null>	<Null>	<Null>	<Null>	Fjord Seascape - Unconsolidated sidewall	<Null>	<Null>	<Null>	Geological Survey of Canada - Pacific
945	945	Point	<Null>	<Null>	Canada West Coast	Canada West Coast_884	<Null>	<Null>	<Null>	0	<Null>	53.5261	-129.586	0	0	0	0	0	<Null>	0	0	0	0	0	<Null>	0	0	0	<Null>	<Null>	<Null>	0	<Null>	0	<Null>	0	<Null>	<Null>	<Null>	<Null>	<Null>	<Null>	<Null>	<Null>	<Null>	<Null>	<Null>	<Null>	Geological Survey of Canada - Pacific
946	946	Point	<Null>	<Null>	Canada West Coast	Canada West Coast_885	<Null>	<Null>	<Null>	0	<Null>	53.5491	-129.618	0	0	0	0	0	<Null>	0	0	0	0	0	<Null>	0	0	0	<Null>	<Null>	<Null>	0	<Null>	0	<Null>	0	<Null>	<Null>	<Null>	<Null>	<Null>	<Null>	<Null>	<Null>	<Null>	<Null>	<Null>	<Null>	Geological Survey of Canada - Pacific
947	947	Point	<Null>	<Null>	Canada West Coast	Canada West Coast_886	<Null>	<Null>	<Null>	0	<Null>	53.5502	-129.62	0	0	0	0	0	<Null>	0	0	0	0	0	<Null>	0	0	0	<Null>	<Null>	<Null>	0	<Null>	0	<Null>	0	<Null>	<Null>	<Null>	<Null>	<Null>	<Null>	<Null>	<Null>	<Null>	<Null>	<Null>	<Null>	Geological Survey of Canada - Pacific
948	948	Point	<Null>	<Null>	Canada West Coast	Canada West Coast_887	<Null>	<Null>	<Null>	0	<Null>	53.5682	-129.651	0	0	0	0	0	<Null>	0	0	0	0	0	<Null>	0	0	0	<Null>	<Null>	<Null>	0	<Null>	0	<Null>	0	<Null>	<Null>	<Null>	<Null>	<Null>	<Null>	<Null>	<Null>	<Null>	<Null>	<Null>	<Null>	Geological Survey of Canada - Pacific
949	949	Point	<Null>	<Null>	Canada West Coast	Canada West Coast_888	<Null>	<Null>	<Null>	0	<Null>	53.5634	-129.643	0	0	0	0	0	<Null>	0	0	0	0	0	<Null>	0	0	0	<Null>	<Null>	<Null>	0	<Null>	0	<Null>	0	<Null>	<Null>	<Null>	<Null>	<Null>	<Null>	<Null>	<Null>	<Null>	<Null>	<Null>	<Null>	Geological Survey of Canada - Pacific
950	950	Point	<Null>	<Null>	Canada West Coast	Canada West Coast_889	<Null>	<Null>	<Null>	0	<Null>	53.5594	-129.637	0	0	0	0	0	<Null>	0	0	0	0	0	<Null>	0	0	0	<Null>	<Null>	<Null>	0	<Null>	0	<Null>	0	<Null>	<Null>	<Null>	<Null>	<Null>	<Null>	<Null>	<Null>	<Null>	<Null>	<Null>	<Null>	Geological Survey of Canada - Pacific
951	951	Point	<Null>	<Null>	Canada West Coast	Canada West Coast_890	<Null>	<Null>	<Null>	0	<Null>	53.5726	-129.656	0	0	0	0	0	<Null>	0	0	0	0	0	<Null>	0	0	0	<Null>	<Null>	<Null>	0	<Null>	0	<Null>	0	<Null>	<Null>	<Null>	<Null>	<Null>	<Null>	<Null>	<Null>	<Null>	<Null>	<Null>	<Null>	Geological Survey of Canada - Pacific
952	952	Point	<Null>	<Null>	Canada West Coast	Canada West Coast_891	<Null>	<Null>	<Null>	0	<Null>	53.5718	-129.658	0	0	0	0	0	<Null>	0	0	0	0	0	<Null>	0	0	0	<Null>	<Null>	<Null>	0	<Null>	0	<Null>	0	<Null>	<Null>	<Null>	<Null>	<Null>	<Null>	<Null>	<Null>	<Null>	<Null>	<Null>	<Null>	Geological Survey of Canada - Pacific
953	953	Point	<Null>	<Null>	Canada West Coast	Canada West Coast_892	<Null>	<Null>	<Null>	0	<Null>	53.5693	-129.655	0	0	0	0	0	<Null>	0	0	0	0	0	<Null>	0	0	0	<Null>	<Null>	<Null>	0	<Null>	0	<Null>	0	<Null>	<Null>	<Null>	<Null>	<Null>	<Null>	<Null>	<Null>	<Null>	<Null>	<Null>	<Null>	Geological Survey of Canada - Pacific
954	954	Point	<Null>	<Null>	Canada West Coast	Canada West Coast_893	<Null>	<Null>	<Null>	0	<Null>	53.5714	-129.654	0	0	0	0	0	<Null>	0	0	0	0	0	<Null>	0	0	0	<Null>	<Null>	<Null>	0	<Null>	0	<Null>	0	<Null>	<Null>	<Null>	<Null>	<Null>	<Null>	<Null>	<Null>	<Null>	<Null>	<Null>	<Null>	Geological Survey of Canada - Pacific
955	955	Point	<Null>	<Null>	Canada West Coast	Canada West Coast_894	<Null>	<Null>	<Null>	0	<Null>	53.5763	-129.661	0	0	0	0	0	<Null>	0	0	0	0	0	<Null>	0	0	0	<Null>	<Null>	<Null>	0	<Null>	0	<Null>	0	<Null>	<Null>	<Null>	<Null>	<Null>	<Null>	<Null>	<Null>	<Null>	<Null>	<Null>	<Null>	Geological Survey of Canada - Pacific
956	956	Point	<Null>	<Null>	Canada West Coast	Canada West Coast_895	<Null>	<Null>	<Null>	0	<Null>	53.5747	-129.663	0	0	0	0	0	<Null>	0	0	0	0	0	<Null>	0	0	0	<Null>	<Null>	<Null>	0	<Null>	0	<Null>	0	<Null>	<Null>	<Null>	<Null>	<Null>	<Null>	<Null>	<Null>	<Null>	<Null>	<Null>	<Null>	Geological Survey of Canada - Pacific
957	957	Point	<Null>	<Null>	Canada West Coast	Canada West Coast_896	<Null>	<Null>	<Null>	0	<Null>	53.5869	-129.68	0	0	0	0	0	<Null>	0	0	0	0	0	<Null>	0	0	0	<Null>	<Null>	<Null>	0	<Null>	0	<Null>	0	<Null>	<Null>	<Null>	<Null>	<Null>	<Null>	<Null>	<Null>	<Null>	<Null>	<Null>	<Null>	Geological Survey of Canada - Pacific
958	958	Point	<Null>	<Null>	Canada West Coast	Canada West Coast_897	<Null>	<Null>	<Null>	0	<Null>	50.8492	-127.729	0	0	0	0	0	<Null>	0	0	0	0	0	<Null>	0	0	0	<Null>	<Null>	<Null>	0	<Null>	0	<Null>	0	<Null>	<Null>	<Null>	<Null>	<Null>	<Null>	<Null>	<Null>	<Null>	<Null>	<Null>	<Null>	Geological Survey of Canada - Pacific
959	959	Point	<Null>	<Null>	Canada West Coast	Canada West Coast_898	<Null>	<Null>	<Null>	0	<Null>	50.8489	-127.723	0	0	0	0	0	<Null>	0	0	0	0	0	<Null>	0	0	0	<Null>	<Null>	<Null>	0	<Null>	0	<Null>	0	<Null>	<Null>	<Null>	<Null>	<Null>	<Null>	<Null>	<Null>	<Null>	<Null>	<Null>	<Null>	Geological Survey of Canada - Pacific
960	960	Point	<Null>	<Null>	Canada West Coast	Canada West Coast_899	<Null>	<Null>	<Null>	0	<Null>	50.8481	-127.717	0	0	0	0	0	<Null>	0	0	0	0	0	<Null>	0	0	0	<Null>	<Null>	<Null>	0	<Null>	0	<Null>	0	<Null>	<Null>	<Null>	<Null>	<Null>	<Null>	<Null>	<Null>	<Null>	<Null>	<Null>	<Null>	Geological Survey of Canada - Pacific
961	961	Point	<Null>	<Null>	Canada West Coast	Canada West Coast_900	<Null>	<Null>	<Null>	0	<Null>	50.8466	-127.712	0	0	0	0	0	<Null>	0	0	0	0	0	<Null>	0	0	0	<Null>	<Null>	<Null>	0	<Null>	0	<Null>	0	<Null>	<Null>	<Null>	<Null>	<Null>	<Null>	<Null>	<Null>	<Null>	<Null>	<Null>	<Null>	Geological Survey of Canada - Pacific
962	962	Point	<Null>	<Null>	Canada West Coast	Canada West Coast_901	<Null>	<Null>	<Null>	0	<Null>	50.8508	-127.738	0	0	0	0	0	<Null>	0	0	0	0	0	<Null>	0	0	0	<Null>	<Null>	<Null>	0	<Null>	0	<Null>	0	<Null>	<Null>	<Null>	<Null>	<Null>	<Null>	<Null>	<Null>	<Null>	<Null>	<Null>	<Null>	Geological Survey of Canada - Pacific
963	963	Point	<Null>	<Null>	Canada West Coast	Canada West Coast_902	<Null>	<Null>	<Null>	0	<Null>	50.8443	-127.796	0	0	0	0	0	<Null>	0	0	0	0	0	<Null>	0	0	0	<Null>	<Null>	<Null>	0	<Null>	0	<Null>	0	<Null>	<Null>	<Null>	<Null>	<Null>	<Null>	<Null>	<Null>	<Null>	<Null>	<Null>	<Null>	Geological Survey of Canada - Pacific
964	964	Point	<Null>	<Null>	Canada West Coast	Canada West Coast_903	<Null>	<Null>	<Null>	0	<Null>	50.818	-127.671	0	0	0	0	0	<Null>	0	0	0	0	0	<Null>	0	0	0	<Null>	<Null>	<Null>	0	<Null>	0	<Null>	0	<Null>	<Null>	<Null>	<Null>	<Null>	<Null>	<Null>	<Null>	<Null>	<Null>	<Null>	<Null>	Geological Survey of Canada - Pacific
965	965	Point	<Null>	<Null>	Canada West Coast	Canada West Coast_904	<Null>	<Null>	<Null>	0	<Null>	50.8187	-127.676	0	0	0	0	0	<Null>	0	0	0	0	0	<Null>	0	0	0	<Null>	<Null>	<Null>	0	<Null>	0	<Null>	0	<Null>	<Null>	<Null>	<Null>	<Null>	<Null>	<Null>	<Null>	<Null>	<Null>	<Null>	<Null>	Geological Survey of Canada - Pacific
966	966	Point	<Null>	<Null>	Canada West Coast	Canada West Coast_905	<Null>	<Null>	<Null>	0	<Null>	53.844	-128.628	0	0	0	0	0	<Null>	0	0	0	0	0	<Null>	0	0	0	<Null>	<Null>	<Null>	0	<Null>	0	<Null>	0	<Null>	<Null>	<Null>	<Null>	<Null>	<Null>	<Null>	<Null>	Fjord Seascape - Deltas	<Null>	<Null>	<Null>	Geological Survey of Canada - Pacific
967	967	Point	<Null>	<Null>	Canada West Coast	Canada West Coast_906	<Null>	<Null>	<Null>	0	<Null>	53.8479	-128.618	0	0	0	0	0	<Null>	0	0	0	0	0	<Null>	0	0	0	<Null>	<Null>	<Null>	0	<Null>	0	<Null>	0	<Null>	<Null>	<Null>	<Null>	<Null>	<Null>	<Null>	<Null>	Fjord Seascape - Deltas	<Null>	<Null>	<Null>	Geological Survey of Canada - Pacific
968	968	Point	<Null>	<Null>	Canada West Coast	Canada West Coast_907	<Null>	<Null>	<Null>	0	<Null>	53.8361	-128.609	0	0	0	0	0	<Null>	0	0	0	0	0	<Null>	0	0	0	<Null>	<Null>	<Null>	0	<Null>	0	<Null>	0	<Null>	<Null>	<Null>	<Null>	<Null>	<Null>	<Null>	<Null>	Fjord Seascape - Postglacial Mud	<Null>	<Null>	<Null>	Geological Survey of Canada - Pacific
969	969	Point	<Null>	<Null>	Canada West Coast	Canada West Coast_908	<Null>	<Null>	<Null>	0	<Null>	53.8347	-128.603	0	0	0	0	0	<Null>	0	0	0	0	0	<Null>	0	0	0	<Null>	<Null>	<Null>	0	<Null>	0	<Null>	0	<Null>	<Null>	<Null>	<Null>	<Null>	<Null>	<Null>	<Null>	Fjord Seascape - Deltas	<Null>	<Null>	<Null>	Geological Survey of Canada - Pacific
970	970	Point	<Null>	<Null>	Canada West Coast	Canada West Coast_909	<Null>	<Null>	<Null>	0	<Null>	53.834	-128.595	0	0	0	0	0	<Null>	0	0	0	0	0	<Null>	0	0	0	<Null>	<Null>	<Null>	0	<Null>	0	<Null>	0	<Null>	<Null>	<Null>	<Null>	<Null>	<Null>	<Null>	<Null>	Fjord Seascape - Deltas	<Null>	<Null>	<Null>	Geological Survey of Canada - Pacific
971	971	Point	<Null>	<Null>	Canada West Coast	Canada West Coast_910	<Null>	<Null>	<Null>	0	<Null>	53.8341	-128.599	0	0	0	0	0	<Null>	0	0	0	0	0	<Null>	0	0	0	<Null>	<Null>	<Null>	0	<Null>	0	<Null>	0	<Null>	<Null>	<Null>	<Null>	<Null>	<Null>	<Null>	<Null>	Fjord Seascape - Postglacial Mud	<Null>	<Null>	<Null>	Geological Survey of Canada - Pacific
972	972	Point	<Null>	<Null>	Canada West Coast	Canada West Coast_911	<Null>	<Null>	<Null>	0	<Null>	53.8361	-128.547	0	0	0	0	0	<Null>	0	0	0	0	0	<Null>	0	0	0	<Null>	<Null>	<Null>	0	<Null>	0	<Null>	0	<Null>	<Null>	<Null>	<Null>	<Null>	<Null>	<Null>	<Null>	Fjord Seascape - Debris flows	<Null>	<Null>	<Null>	Geological Survey of Canada - Pacific
973	973	Point	<Null>	<Null>	Canada West Coast	Canada West Coast_912	<Null>	<Null>	<Null>	0	<Null>	53.8331	-128.579	0	0	0	0	0	<Null>	0	0	0	0	0	<Null>	0	0	0	<Null>	<Null>	<Null>	0	<Null>	0	<Null>	0	<Null>	<Null>	<Null>	<Null>	<Null>	<Null>	<Null>	<Null>	Fjord Seascape - Deltas	<Null>	<Null>	<Null>	Geological Survey of Canada - Pacific
974	974	Point	<Null>	<Null>	Canada West Coast	Canada West Coast_913	<Null>	<Null>	<Null>	0	<Null>	53.8589	-128.638	0	0	0	0	0	<Null>	0	0	0	0	0	<Null>	0	0	0	<Null>	<Null>	<Null>	0	<Null>	0	<Null>	0	<Null>	<Null>	<Null>	<Null>	<Null>	<Null>	<Null>	<Null>	Fjord Seascape - Deltas	<Null>	<Null>	<Null>	Geological Survey of Canada - Pacific
975	975	Point	<Null>	<Null>	Canada West Coast	Canada West Coast_914	<Null>	<Null>	<Null>	0	<Null>	50.546	-126.77	0	0	0	0	0	<Null>	0	0	0	0	0	<Null>	0	0	0	<Null>	<Null>	<Null>	0	<Null>	0	<Null>	0	<Null>	<Null>	<Null>	<Null>	<Null>	<Null>	<Null>	<Null>	<Null>	<Null>	<Null>	<Null>	Geological Survey of Canada - Pacific
976	976	Point	<Null>	<Null>	Canada West Coast	Canada West Coast_915	<Null>	<Null>	<Null>	0	<Null>	50.5247	-126.69	0	0	0	0	0	<Null>	0	0	0	0	0	<Null>	0	0	0	<Null>	<Null>	<Null>	0	<Null>	0	<Null>	0	<Null>	<Null>	<Null>	<Null>	<Null>	<Null>	<Null>	<Null>	<Null>	<Null>	<Null>	<Null>	Geological Survey of Canada - Pacific
977	977	Point	<Null>	<Null>	Canada West Coast	Canada West Coast_916	<Null>	<Null>	<Null>	0	<Null>	50.5188	-126.664	0	0	0	0	0	<Null>	0	0	0	0	0	<Null>	0	0	0	<Null>	<Null>	<Null>	0	<Null>	0	<Null>	0	<Null>	<Null>	<Null>	<Null>	<Null>	<Null>	<Null>	<Null>	<Null>	<Null>	<Null>	<Null>	Geological Survey of Canada - Pacific
978	978	Point	<Null>	<Null>	Canada West Coast	Canada West Coast_917	<Null>	<Null>	<Null>	0	<Null>	50.5168	-126.659	0	0	0	0	0	<Null>	0	0	0	0	0	<Null>	0	0	0	<Null>	<Null>	<Null>	0	<Null>	0	<Null>	0	<Null>	<Null>	<Null>	<Null>	<Null>	<Null>	<Null>	<Null>	<Null>	<Null>	<Null>	<Null>	Geological Survey of Canada - Pacific
979	979	Point	<Null>	<Null>	Canada West Coast	Canada West Coast_918	<Null>	<Null>	<Null>	0	<Null>	50.5151	-126.652	0	0	0	0	0	<Null>	0	0	0	0	0	<Null>	0	0	0	<Null>	<Null>	<Null>	0	<Null>	0	<Null>	0	<Null>	<Null>	<Null>	<Null>	<Null>	<Null>	<Null>	<Null>	<Null>	<Null>	<Null>	<Null>	Geological Survey of Canada - Pacific
980	980	Point	<Null>	<Null>	Canada West Coast	Canada West Coast_919	<Null>	<Null>	<Null>	0	<Null>	50.5088	-126.64	0	0	0	0	0	<Null>	0	0	0	0	0	<Null>	0	0	0	<Null>	<Null>	<Null>	0	<Null>	0	<Null>	0	<Null>	<Null>	<Null>	<Null>	<Null>	<Null>	<Null>	<Null>	<Null>	<Null>	<Null>	<Null>	Geological Survey of Canada - Pacific
981	981	Point	<Null>	<Null>	Canada West Coast	Canada West Coast_920	<Null>	<Null>	<Null>	0	<Null>	50.5072	-126.627	0	0	0	0	0	<Null>	0	0	0	0	0	<Null>	0	0	0	<Null>	<Null>	<Null>	0	<Null>	0	<Null>	0	<Null>	<Null>	<Null>	<Null>	<Null>	<Null>	<Null>	<Null>	<Null>	<Null>	<Null>	<Null>	Geological Survey of Canada - Pacific
982	982	Point	<Null>	<Null>	Canada West Coast	Canada West Coast_921	<Null>	<Null>	<Null>	0	<Null>	50.5025	-126.619	0	0	0	0	0	<Null>	0	0	0	0	0	<Null>	0	0	0	<Null>	<Null>	<Null>	0	<Null>	0	<Null>	0	<Null>	<Null>	<Null>	<Null>	<Null>	<Null>	<Null>	<Null>	<Null>	<Null>	<Null>	<Null>	Geological Survey of Canada - Pacific
983	983	Point	<Null>	<Null>	Canada West Coast	Canada West Coast_922	<Null>	<Null>	<Null>	0	<Null>	50.4894	-126.603	0	0	0	0	0	<Null>	0	0	0	0	0	<Null>	0	0	0	<Null>	<Null>	<Null>	0	<Null>	0	<Null>	0	<Null>	<Null>	<Null>	<Null>	<Null>	<Null>	<Null>	<Null>	<Null>	<Null>	<Null>	<Null>	Geological Survey of Canada - Pacific
984	984	Point	<Null>	<Null>	Canada West Coast	Canada West Coast_923	<Null>	<Null>	<Null>	0	<Null>	50.4882	-126.584	0	0	0	0	0	<Null>	0	0	0	0	0	<Null>	0	0	0	<Null>	<Null>	<Null>	0	<Null>	0	<Null>	0	<Null>	<Null>	<Null>	<Null>	<Null>	<Null>	<Null>	<Null>	<Null>	<Null>	<Null>	<Null>	Geological Survey of Canada - Pacific
985	985	Point	<Null>	<Null>	Canada West Coast	Canada West Coast_924	<Null>	<Null>	<Null>	0	<Null>	50.4938	-126.501	0	0	0	0	0	<Null>	0	0	0	0	0	<Null>	0	0	0	<Null>	<Null>	<Null>	0	<Null>	0	<Null>	0	<Null>	<Null>	<Null>	<Null>	<Null>	<Null>	<Null>	<Null>	<Null>	<Null>	<Null>	<Null>	Geological Survey of Canada - Pacific
986	986	Point	<Null>	<Null>	Canada West Coast	Canada West Coast_925	<Null>	<Null>	<Null>	0	<Null>	50.4887	-126.402	0	0	0	0	0	<Null>	0	0	0	0	0	<Null>	0	0	0	<Null>	<Null>	<Null>	0	<Null>	0	<Null>	0	<Null>	<Null>	<Null>	<Null>	<Null>	<Null>	<Null>	<Null>	<Null>	<Null>	<Null>	<Null>	Geological Survey of Canada - Pacific
987	987	Point	<Null>	<Null>	Canada West Coast	Canada West Coast_926	<Null>	<Null>	<Null>	0	<Null>	50.4876	-126.368	0	0	0	0	0	<Null>	0	0	0	0	0	<Null>	0	0	0	<Null>	<Null>	<Null>	0	<Null>	0	<Null>	0	<Null>	<Null>	<Null>	<Null>	<Null>	<Null>	<Null>	<Null>	<Null>	<Null>	<Null>	<Null>	Geological Survey of Canada - Pacific
988	988	Point	<Null>	<Null>	Canada West Coast	Canada West Coast_927	<Null>	<Null>	<Null>	0	<Null>	50.4854	-126.332	0	0	0	0	0	<Null>	0	0	0	0	0	<Null>	0	0	0	<Null>	<Null>	<Null>	0	<Null>	0	<Null>	0	<Null>	<Null>	<Null>	<Null>	<Null>	<Null>	<Null>	<Null>	<Null>	<Null>	<Null>	<Null>	Geological Survey of Canada - Pacific
989	989	Point	<Null>	<Null>	Canada West Coast	Canada West Coast_928	<Null>	<Null>	<Null>	0	<Null>	50.4772	-126.288	0	0	0	0	0	<Null>	0	0	0	0	0	<Null>	0	0	0	<Null>	<Null>	<Null>	0	<Null>	0	<Null>	0	<Null>	<Null>	<Null>	<Null>	<Null>	<Null>	<Null>	<Null>	<Null>	<Null>	<Null>	<Null>	Geological Survey of Canada - Pacific
990	990	Point	<Null>	<Null>	Canada West Coast	Canada West Coast_929	<Null>	<Null>	<Null>	0	<Null>	50.4766	-126.27	0	0	0	0	0	<Null>	0	0	0	0	0	<Null>	0	0	0	<Null>	<Null>	<Null>	0	<Null>	0	<Null>	0	<Null>	<Null>	<Null>	<Null>	<Null>	<Null>	<Null>	<Null>	<Null>	<Null>	<Null>	<Null>	Geological Survey of Canada - Pacific
991	991	Point	<Null>	<Null>	Canada West Coast	Canada West Coast_930	<Null>	<Null>	<Null>	0	<Null>	50.4629	-126.166	0	0	0	0	0	<Null>	0	0	0	0	0	<Null>	0	0	0	<Null>	<Null>	<Null>	0	<Null>	0	<Null>	0	<Null>	<Null>	<Null>	<Null>	<Null>	<Null>	<Null>	<Null>	<Null>	<Null>	<Null>	<Null>	Geological Survey of Canada - Pacific
992	992	Point	<Null>	<Null>	Canada West Coast	Canada West Coast_931	<Null>	<Null>	<Null>	0	<Null>	50.4584	-126.115	0	0	0	0	0	<Null>	0	0	0	0	0	<Null>	0	0	0	<Null>	<Null>	<Null>	0	<Null>	0	<Null>	0	<Null>	<Null>	<Null>	<Null>	<Null>	<Null>	<Null>	<Null>	<Null>	<Null>	<Null>	<Null>	Geological Survey of Canada - Pacific
993	993	Point	<Null>	<Null>	Canada West Coast	Canada West Coast_932	<Null>	<Null>	<Null>	0	<Null>	50.4156	-125.985	0	0	0	0	0	<Null>	0	0	0	0	0	<Null>	0	0	0	<Null>	<Null>	<Null>	0	<Null>	0	<Null>	0	<Null>	<Null>	<Null>	<Null>	<Null>	<Null>	<Null>	<Null>	<Null>	<Null>	<Null>	<Null>	Geological Survey of Canada - Pacific
994	994	Point	<Null>	<Null>	Canada West Coast	Canada West Coast_933	<Null>	<Null>	<Null>	0	<Null>	50.3693	-125.763	0	0	0	0	0	<Null>	0	0	0	0	0	<Null>	0	0	0	<Null>	<Null>	<Null>	0	<Null>	0	<Null>	0	<Null>	<Null>	<Null>	<Null>	<Null>	<Null>	<Null>	<Null>	<Null>	<Null>	<Null>	<Null>	Geological Survey of Canada - Pacific
995	995	Point	<Null>	<Null>	Canada West Coast	Canada West Coast_934	<Null>	<Null>	<Null>	0	<Null>	50.3453	-125.519	0	0	0	0	0	<Null>	0	0	0	0	0	<Null>	0	0	0	<Null>	<Null>	<Null>	0	<Null>	0	<Null>	0	<Null>	<Null>	<Null>	<Null>	<Null>	<Null>	<Null>	<Null>	<Null>	<Null>	<Null>	<Null>	Geological Survey of Canada - Pacific
996	996	Point	<Null>	<Null>	Canada West Coast	Canada West Coast_935	<Null>	<Null>	<Null>	0	<Null>	50.3356	-125.481	0	0	0	0	0	<Null>	0	0	0	0	0	<Null>	0	0	0	<Null>	<Null>	<Null>	0	<Null>	0	<Null>	0	<Null>	<Null>	<Null>	<Null>	<Null>	<Null>	<Null>	<Null>	<Null>	<Null>	<Null>	<Null>	Geological Survey of Canada - Pacific
997	997	Point	<Null>	<Null>	Canada West Coast	Canada West Coast_936	<Null>	<Null>	<Null>	0	<Null>	50.333	-125.477	0	0	0	0	0	<Null>	0	0	0	0	0	<Null>	0	0	0	<Null>	<Null>	<Null>	0	<Null>	0	<Null>	0	<Null>	<Null>	<Null>	<Null>	<Null>	<Null>	<Null>	<Null>	<Null>	<Null>	<Null>	<Null>	Geological Survey of Canada - Pacific
998	998	Point	<Null>	<Null>	Canada West Coast	Canada West Coast_937	<Null>	<Null>	<Null>	0	<Null>	50.2434	-125.393	0	0	0	0	0	<Null>	0	0	0	0	0	<Null>	0	0	0	<Null>	<Null>	<Null>	0	<Null>	0	<Null>	0	<Null>	<Null>	<Null>	<Null>	<Null>	<Null>	<Null>	<Null>	<Null>	<Null>	<Null>	<Null>	Geological Survey of Canada - Pacific
999	999	Point	<Null>	<Null>	Canada West Coast	Canada West Coast_938	<Null>	<Null>	<Null>	0	<Null>	50.2245	-125.383	0	0	0	0	0	<Null>	0	0	0	0	0	<Null>	0	0	0	<Null>	<Null>	<Null>	0	<Null>	0	<Null>	0	<Null>	<Null>	<Null>	<Null>	<Null>	<Null>	<Null>	<Null>	<Null>	<Null>	<Null>	<Null>	Geological Survey of Canada - Pacific
1000	1000	Point	<Null>	<Null>	Canada West Coast	Canada West Coast_939	<Null>	<Null>	<Null>	0	<Null>	50.2106	-125.381	0	0	0	0	0	<Null>	0	0	0	0	0	<Null>	0	0	0	<Null>	<Null>	<Null>	0	<Null>	0	<Null>	0	<Null>	<Null>	<Null>	<Null>	<Null>	<Null>	<Null>	<Null>	<Null>	<Null>	<Null>	<Null>	Geological Survey of Canada - Pacific
1001	1001	Point	<Null>	<Null>	Canada West Coast	Canada West Coast_940	<Null>	<Null>	<Null>	0	<Null>	50.1973	-125.377	0	0	0	0	0	<Null>	0	0	0	0	0	<Null>	0	0	0	<Null>	<Null>	<Null>	0	<Null>	0	<Null>	0	<Null>	<Null>	<Null>	<Null>	<Null>	<Null>	<Null>	<Null>	<Null>	<Null>	<Null>	<Null>	Geological Survey of Canada - Pacific
1002	1002	Point	<Null>	<Null>	Canada West Coast	Canada West Coast_941	<Null>	<Null>	<Null>	0	<Null>	50.1773	-125.374	0	0	0	0	0	<Null>	0	0	0	0	0	<Null>	0	0	0	<Null>	<Null>	<Null>	0	<Null>	0	<Null>	0	<Null>	<Null>	<Null>	<Null>	<Null>	<Null>	<Null>	<Null>	<Null>	<Null>	<Null>	<Null>	Geological Survey of Canada - Pacific
1003	1003	Point	<Null>	<Null>	Canada West Coast	Canada West Coast_942	<Null>	<Null>	<Null>	0	<Null>	53.6765	-129.136	0	0	0	0	0	<Null>	0	0	0	0	0	<Null>	0	0	0	<Null>	<Null>	<Null>	0	<Null>	0	<Null>	0	<Null>	<Null>	<Null>	<Null>	<Null>	<Null>	<Null>	<Null>	Fjord Seascape - Unconsolidated sidewall	<Null>	<Null>	<Null>	Geological Survey of Canada - Pacific
1004	1004	Point	<Null>	<Null>	Canada West Coast	Canada West Coast_943	<Null>	<Null>	<Null>	0	<Null>	53.6646	-129.158	0	0	0	0	0	<Null>	0	0	0	0	0	<Null>	0	0	0	<Null>	<Null>	<Null>	0	<Null>	0	<Null>	0	<Null>	<Null>	<Null>	<Null>	<Null>	<Null>	<Null>	<Null>	Fjord Seascape - Deltas	<Null>	<Null>	<Null>	Geological Survey of Canada - Pacific
1005	1005	Point	<Null>	<Null>	Canada West Coast	Canada West Coast_944	<Null>	<Null>	<Null>	0	<Null>	53.6715	-129.141	0	0	0	0	0	<Null>	0	0	0	0	0	<Null>	0	0	0	<Null>	<Null>	<Null>	0	<Null>	0	<Null>	0	<Null>	<Null>	<Null>	<Null>	<Null>	<Null>	<Null>	<Null>	Fjord Seascape - Unconsolidated sidewall	<Null>	<Null>	<Null>	Geological Survey of Canada - Pacific
1021	1006	Point	<Null>	<Null>	Canada West Coast	Canada West Coast_945	<Null>	<Null>	<Null>	0	<Null>	53.5169	-129.229	0	0	0	0	0	<Null>	0	0	0	0	0	<Null>	0	0	0	<Null>	<Null>	<Null>	0	<Null>	0	<Null>	0	<Null>	<Null>	<Null>	<Null>	<Null>	<Null>	<Null>	<Null>	Fjord Seascape - Debris flows	<Null>	<Null>	<Null>	Geological Survey of Canada - Pacific
1045	1007	Point	<Null>	<Null>	Canada West Coast	Canada West Coast_946	<Null>	<Null>	<Null>	0	<Null>	53.5313	-129.231	0	0	0	0	0	<Null>	0	0	0	0	0	<Null>	0	0	0	<Null>	<Null>	<Null>	0	<Null>	0	<Null>	0	<Null>	<Null>	<Null>	<Null>	<Null>	<Null>	<Null>	<Null>	Fjord Seascape - Postglacial Mud	<Null>	<Null>	<Null>	Geological Survey of Canada - Pacific
1046	1008	Point	<Null>	<Null>	Canada West Coast	Canada West Coast_947	<Null>	<Null>	<Null>	0	<Null>	53.5277	-129.232	0	0	0	0	0	<Null>	0	0	0	0	0	<Null>	0	0	0	<Null>	<Null>	<Null>	0	<Null>	0	<Null>	0	<Null>	<Null>	<Null>	<Null>	<Null>	<Null>	<Null>	<Null>	Fjord Seascape - Postglacial Mud	<Null>	<Null>	<Null>	Geological Survey of Canada - Pacific
1047	1009	Point	<Null>	<Null>	Canada West Coast	Canada West Coast_948	<Null>	<Null>	<Null>	0	<Null>	53.0996	-129.202	0	0	0	0	0	<Null>	0	0	0	0	0	<Null>	0	0	0	<Null>	<Null>	<Null>	0	<Null>	0	<Null>	0	<Null>	<Null>	<Null>	<Null>	<Null>	<Null>	<Null>	<Null>	Fjord Seascape - Deltas	<Null>	<Null>	<Null>	Geological Survey of Canada - Pacific
1048	1010	Point	<Null>	<Null>	Canada West Coast	Canada West Coast_949	<Null>	<Null>	<Null>	0	<Null>	53.3102	-129.294	0	0	0	0	0	<Null>	0	0	0	0	0	<Null>	0	0	0	<Null>	<Null>	<Null>	0	<Null>	0	<Null>	0	<Null>	<Null>	<Null>	<Null>	<Null>	<Null>	<Null>	<Null>	Fjord Seascape - Winnowed Scoured Seafloor	<Null>	<Null>	<Null>	Geological Survey of Canada - Pacific
1049	1011	Point	<Null>	<Null>	Canada West Coast	Canada West Coast_950	<Null>	<Null>	<Null>	0	<Null>	53.3152	-129.027	0	0	0	0	0	<Null>	0	0	0	0	0	<Null>	0	0	0	<Null>	<Null>	<Null>	0	<Null>	0	<Null>	0	<Null>	<Null>	<Null>	<Null>	<Null>	<Null>	<Null>	<Null>	Fjord Seascape - Unconsolidated sidewall	<Null>	<Null>	<Null>	Geological Survey of Canada - Pacific
1050	1012	Point	<Null>	<Null>	Canada West Coast	Canada West Coast_951	<Null>	<Null>	<Null>	0	<Null>	53.4458	-129.232	0	0	0	0	0	<Null>	0	0	0	0	0	<Null>	0	0	0	<Null>	<Null>	<Null>	0	<Null>	0	<Null>	0	<Null>	<Null>	<Null>	<Null>	<Null>	<Null>	<Null>	<Null>	Fjord Seascape - Deltas	<Null>	<Null>	<Null>	Geological Survey of Canada - Pacific
1051	1013	Point	<Null>	<Null>	Canada West Coast	Canada West Coast_952	<Null>	<Null>	<Null>	0	<Null>	53.5044	-129.234	0	0	0	0	0	<Null>	0	0	0	0	0	<Null>	0	0	0	<Null>	<Null>	<Null>	0	<Null>	0	<Null>	0	<Null>	<Null>	<Null>	<Null>	<Null>	<Null>	<Null>	<Null>	Fjord Seascape - Postglacial Mud	<Null>	<Null>	<Null>	Geological Survey of Canada - Pacific
1052	1014	Point	<Null>	<Null>	Canada West Coast	Canada West Coast_953	<Null>	<Null>	<Null>	0	<Null>	53.3644	-129.306	0	0	0	0	0	<Null>	0	0	0	0	0	<Null>	0	0	0	<Null>	<Null>	<Null>	0	<Null>	0	<Null>	0	<Null>	<Null>	<Null>	<Null>	<Null>	<Null>	<Null>	<Null>	Fjord Seascape - Unconsolidated sidewall	<Null>	<Null>	<Null>	Geological Survey of Canada - Pacific
1053	1015	Point	<Null>	<Null>	Canada West Coast	Canada West Coast_954	<Null>	<Null>	<Null>	0	<Null>	53.32	-129.217	0	0	0	0	0	<Null>	0	0	0	0	0	<Null>	0	0	0	<Null>	<Null>	<Null>	0	<Null>	0	<Null>	0	<Null>	<Null>	<Null>	<Null>	<Null>	<Null>	<Null>	<Null>	Fjord Seascape - Unconsolidated sidewall	<Null>	<Null>	<Null>	Geological Survey of Canada - Pacific
1054	1016	Point	<Null>	<Null>	Canada West Coast	Canada West Coast_955	<Null>	<Null>	<Null>	0	<Null>	50.6833	-126.924	0	0	0	0	0	<Null>	0	0	0	0	0	<Null>	0	0	0	<Null>	<Null>	<Null>	0	<Null>	0	<Null>	0	<Null>	<Null>	<Null>	<Null>	<Null>	<Null>	<Null>	<Null>	<Null>	<Null>	<Null>	<Null>	Geological Survey of Canada - Pacific
1055	1017	Point	<Null>	<Null>	Canada West Coast	Canada West Coast_956	<Null>	<Null>	<Null>	0	<Null>	50.3666	-125.637	0	0	0	0	0	<Null>	0	0	0	0	0	<Null>	0	0	0	<Null>	<Null>	<Null>	0	<Null>	0	<Null>	0	<Null>	<Null>	<Null>	<Null>	<Null>	<Null>	<Null>	<Null>	<Null>	<Null>	<Null>	<Null>	Geological Survey of Canada - Pacific
1056	1018	Point	<Null>	<Null>	Canada West Coast	Canada West Coast_957	<Null>	<Null>	<Null>	0	<Null>	50.7885	-125.605	0	0	0	0	0	<Null>	0	0	0	0	0	<Null>	0	0	0	<Null>	<Null>	<Null>	0	<Null>	0	<Null>	0	<Null>	<Null>	<Null>	<Null>	<Null>	<Null>	<Null>	<Null>	<Null>	<Null>	<Null>	<Null>	Geological Survey of Canada - Pacific
1057	1019	Point	<Null>	<Null>	Canada West Coast	Canada West Coast_958	<Null>	<Null>	<Null>	0	<Null>	50.7814	-125.614	0	0	0	0	0	<Null>	0	0	0	0	0	<Null>	0	0	0	<Null>	<Null>	<Null>	0	<Null>	0	<Null>	0	<Null>	<Null>	<Null>	<Null>	<Null>	<Null>	<Null>	<Null>	<Null>	<Null>	<Null>	<Null>	Geological Survey of Canada - Pacific
1058	1020	Point	<Null>	<Null>	Canada West Coast	Canada West Coast_959	<Null>	<Null>	<Null>	0	<Null>	50.8046	-125.605	0	0	0	0	0	<Null>	0	0	0	0	0	<Null>	0	0	0	<Null>	<Null>	<Null>	0	<Null>	0	<Null>	0	<Null>	<Null>	<Null>	<Null>	<Null>	<Null>	<Null>	<Null>	<Null>	<Null>	<Null>	<Null>	Geological Survey of Canada - Pacific
1059	1021	Point	<Null>	<Null>	Canada West Coast	Canada West Coast_960	Douglas Channel Slide B (Hawkbury Island)	<Null>	<Null>	0	<Null>	53.4074	-129.189	0	0	0	0	0	<Null>	0	0	0	0	0	<Null>	0	0	0	<Null>	<Null>	<Null>	0	<Null>	0	<Null>	0	<Null>	<Null>	<Null>	0.031	Estimated volume is approximate -do not include buried debris spreading into the fiord after initial block sliding.	Mid-Holocene (5000 to 10,000 years BP)	<Null>	Episodically active creeping slide between 13 ka BP and 11.5 ka BP. Estimate constrained to to less than 14000 yrs BP (after deglaciation), but based on evidence of sediment drape/cover, presence of smaller landslides within the sediment drape and erodin	Fjord Seascape - Bedrock creep	Multibeam bathymetry Kongsberg SIS systems Simrad EM2002 and EM710; high-resolution seismic Sparker data and Chirp data with Benthos piston coring	Data collected in water depth greater than 50 meters in 2009 using a hull-mounted Kongsberg-Simrad EM002 and the Kongsberg-Simrad EM 710 at 70-100 kHz in 2010 and inshore deeper than 5 meters using EM3002 multibeam systems; High resolution 220 line km Spa	Canadian Coast Guard Ship (CCGS) Vector cruises in Kitimat Arm and Douglas channel between 2007 and 2010, and on CCGS John P. Tully in November 2013 and October 2014	Geological Survey of Canada - Pacific
1060	1022	Point	<Null>	<Null>	Canada West Coast	Canada West Coast_961	<Null>	<Null>	<Null>	0	<Null>	50.962	-125.518	0	0	0	0	0	<Null>	0	0	0	0	0	<Null>	0	0	0	<Null>	<Null>	<Null>	0	<Null>	0	<Null>	0	<Null>	<Null>	<Null>	<Null>	<Null>	<Null>	<Null>	<Null>	<Null>	<Null>	<Null>	<Null>	Geological Survey of Canada - Pacific
1061	1023	Point	<Null>	<Null>	Canada West Coast	Canada West Coast_962	<Null>	<Null>	<Null>	0	<Null>	50.9248	-125.523	0	0	0	0	0	<Null>	0	0	0	0	0	<Null>	0	0	0	<Null>	<Null>	<Null>	0	<Null>	0	<Null>	0	<Null>	<Null>	<Null>	<Null>	<Null>	<Null>	<Null>	<Null>	<Null>	<Null>	<Null>	<Null>	Geological Survey of Canada - Pacific
1062	1024	Point	<Null>	<Null>	Canada West Coast	Canada West Coast_963	<Null>	<Null>	<Null>	0	<Null>	50.9144	-125.528	0	0	0	0	0	<Null>	0	0	0	0	0	<Null>	0	0	0	<Null>	<Null>	<Null>	0	<Null>	0	<Null>	0	<Null>	<Null>	<Null>	<Null>	<Null>	<Null>	<Null>	<Null>	<Null>	<Null>	<Null>	<Null>	Geological Survey of Canada - Pacific
1063	1025	Point	<Null>	<Null>	Canada West Coast	Canada West Coast_964	<Null>	<Null>	<Null>	0	<Null>	50.9133	-125.529	0	0	0	0	0	<Null>	0	0	0	0	0	<Null>	0	0	0	<Null>	<Null>	<Null>	0	<Null>	0	<Null>	0	<Null>	<Null>	<Null>	<Null>	<Null>	<Null>	<Null>	<Null>	<Null>	<Null>	<Null>	<Null>	Geological Survey of Canada - Pacific
1064	1026	Point	<Null>	<Null>	Canada West Coast	Canada West Coast_965	<Null>	<Null>	<Null>	0	<Null>	50.9129	-125.533	0	0	0	0	0	<Null>	0	0	0	0	0	<Null>	0	0	0	<Null>	<Null>	<Null>	0	<Null>	0	<Null>	0	<Null>	<Null>	<Null>	<Null>	<Null>	<Null>	<Null>	<Null>	<Null>	<Null>	<Null>	<Null>	Geological Survey of Canada - Pacific
1065	1027	Point	<Null>	<Null>	Canada West Coast	Canada West Coast_966	<Null>	<Null>	<Null>	0	<Null>	50.8672	-125.633	0	0	0	0	0	<Null>	0	0	0	0	0	<Null>	0	0	0	<Null>	<Null>	<Null>	0	<Null>	0	<Null>	0	<Null>	<Null>	<Null>	<Null>	<Null>	<Null>	<Null>	<Null>	<Null>	<Null>	<Null>	<Null>	Geological Survey of Canada - Pacific
1066	1028	Point	<Null>	<Null>	Canada West Coast	Canada West Coast_967	<Null>	<Null>	<Null>	0	<Null>	53.4252	-129.194	0	0	0	0	0	<Null>	0	0	0	0	0	<Null>	0	0	0	<Null>	<Null>	<Null>	0	<Null>	0	<Null>	0	<Null>	<Null>	<Null>	<Null>	<Null>	<Null>	<Null>	<Null>	Fjord Seascape - Unconsolidated sidewall	<Null>	<Null>	<Null>	Geological Survey of Canada - Pacific
1067	1029	Point	<Null>	<Null>	Canada West Coast	Canada West Coast_968	<Null>	<Null>	<Null>	0	<Null>	53.5015	-129.237	0	0	0	0	0	<Null>	0	0	0	0	0	<Null>	0	0	0	<Null>	<Null>	<Null>	0	<Null>	0	<Null>	0	<Null>	<Null>	<Null>	<Null>	<Null>	<Null>	<Null>	<Null>	Fjord Seascape - Postglacial Mud	<Null>	<Null>	<Null>	Geological Survey of Canada - Pacific
1068	1030	Point	<Null>	<Null>	Canada West Coast	Canada West Coast_969	<Null>	<Null>	<Null>	0	<Null>	53.5816	-129.187	0	0	0	0	0	<Null>	0	0	0	0	0	<Null>	0	0	0	<Null>	<Null>	<Null>	0	<Null>	0	<Null>	0	<Null>	<Null>	<Null>	<Null>	<Null>	<Null>	<Null>	<Null>	Fjord Seascape - Unconsolidated sidewall	<Null>	<Null>	<Null>	Geological Survey of Canada - Pacific
1069	1031	Point	<Null>	<Null>	Canada West Coast	Canada West Coast_970	<Null>	<Null>	<Null>	0	<Null>	53.578	-129.186	0	0	0	0	0	<Null>	0	0	0	0	0	<Null>	0	0	0	<Null>	<Null>	<Null>	0	<Null>	0	<Null>	0	<Null>	<Null>	<Null>	<Null>	<Null>	<Null>	<Null>	<Null>	Fjord Seascape - Deltas	<Null>	<Null>	<Null>	Geological Survey of Canada - Pacific
1070	1032	Point	<Null>	<Null>	Canada West Coast	Canada West Coast_971	<Null>	<Null>	<Null>	0	<Null>	53.5632	-129.184	0	0	0	0	0	<Null>	0	0	0	0	0	<Null>	0	0	0	<Null>	<Null>	<Null>	0	<Null>	0	<Null>	0	<Null>	<Null>	<Null>	<Null>	<Null>	<Null>	<Null>	<Null>	Fjord Seascape - Unconsolidated sidewall	<Null>	<Null>	<Null>	Geological Survey of Canada - Pacific
1071	1033	Point	<Null>	<Null>	Canada West Coast	Canada West Coast_972	<Null>	<Null>	<Null>	0	<Null>	53.566	-129.184	0	0	0	0	0	<Null>	0	0	0	0	0	<Null>	0	0	0	<Null>	<Null>	<Null>	0	<Null>	0	<Null>	0	<Null>	<Null>	<Null>	<Null>	<Null>	<Null>	<Null>	<Null>	Fjord Seascape - Unconsolidated sidewall	<Null>	<Null>	<Null>	Geological Survey of Canada - Pacific
1072	1034	Point	<Null>	<Null>	Canada West Coast	Canada West Coast_973	<Null>	<Null>	<Null>	0	<Null>	53.569	-129.184	0	0	0	0	0	<Null>	0	0	0	0	0	<Null>	0	0	0	<Null>	<Null>	<Null>	0	<Null>	0	<Null>	0	<Null>	<Null>	<Null>	<Null>	<Null>	<Null>	<Null>	<Null>	Fjord Seascape - Unconsolidated sidewall	<Null>	<Null>	<Null>	Geological Survey of Canada - Pacific
1073	1035	Point	<Null>	<Null>	Canada West Coast	Canada West Coast_974	<Null>	<Null>	<Null>	0	<Null>	53.7369	-129.054	0	0	0	0	0	<Null>	0	0	0	0	0	<Null>	0	0	0	<Null>	<Null>	<Null>	0	<Null>	0	<Null>	0	<Null>	<Null>	<Null>	<Null>	<Null>	<Null>	<Null>	<Null>	Fjord Seascape - Postglacial Mud	<Null>	<Null>	<Null>	Geological Survey of Canada - Pacific
1074	1036	Point	<Null>	<Null>	Canada West Coast	Canada West Coast_975	<Null>	<Null>	<Null>	0	<Null>	53.7589	-129.002	0	0	0	0	0	<Null>	0	0	0	0	0	<Null>	0	0	0	<Null>	<Null>	<Null>	0	<Null>	0	<Null>	0	<Null>	<Null>	<Null>	<Null>	<Null>	<Null>	<Null>	<Null>	Fjord Seascape - Postglacial Mud	<Null>	<Null>	<Null>	Geological Survey of Canada - Pacific
1075	1037	Point	<Null>	<Null>	Canada West Coast	Canada West Coast_976	<Null>	<Null>	<Null>	0	<Null>	53.834	-128.563	0	0	0	0	0	<Null>	0	0	0	0	0	<Null>	0	0	0	<Null>	<Null>	<Null>	0	<Null>	0	<Null>	0	<Null>	<Null>	<Null>	<Null>	<Null>	<Null>	<Null>	<Null>	Fjord Seascape - Deltas	<Null>	<Null>	<Null>	Geological Survey of Canada - Pacific
1076	1038	Point	<Null>	<Null>	Canada West Coast	Canada West Coast_977	<Null>	<Null>	<Null>	0	<Null>	53.7207	-128.796	0	0	0	0	0	<Null>	0	0	0	0	0	<Null>	0	0	0	<Null>	<Null>	<Null>	0	<Null>	0	<Null>	0	<Null>	<Null>	<Null>	<Null>	<Null>	<Null>	<Null>	<Null>	Fjord Seascape - Deltas	<Null>	<Null>	<Null>	Geological Survey of Canada - Pacific
1077	1039	Point	<Null>	<Null>	Canada West Coast	Canada West Coast_978	<Null>	<Null>	<Null>	0	<Null>	53.7128	-128.792	0	0	0	0	0	<Null>	0	0	0	0	0	<Null>	0	0	0	<Null>	<Null>	<Null>	0	<Null>	0	<Null>	0	<Null>	<Null>	<Null>	<Null>	<Null>	<Null>	<Null>	<Null>	Fjord Seascape - Postglacial Mud	<Null>	<Null>	<Null>	Geological Survey of Canada - Pacific
1078	1040	Point	<Null>	<Null>	Canada West Coast	Canada West Coast_979	<Null>	<Null>	<Null>	0	<Null>	53.7242	-129.024	0	0	0	0	0	<Null>	0	0	0	0	0	<Null>	0	0	0	<Null>	<Null>	<Null>	0	<Null>	0	<Null>	0	<Null>	<Null>	<Null>	<Null>	<Null>	<Null>	<Null>	<Null>	Fjord Seascape - Deltas	<Null>	<Null>	<Null>	Geological Survey of Canada - Pacific
1079	1041	Point	<Null>	<Null>	Canada West Coast	Canada West Coast_980	<Null>	<Null>	<Null>	0	<Null>	53.6642	-129.108	0	0	0	0	0	<Null>	0	0	0	0	0	<Null>	0	0	0	<Null>	<Null>	<Null>	0	<Null>	0	<Null>	0	<Null>	<Null>	<Null>	<Null>	<Null>	<Null>	<Null>	<Null>	Fjord Seascape - Deltas	<Null>	<Null>	<Null>	Geological Survey of Canada - Pacific
1080	1042	Point	<Null>	<Null>	Canada West Coast	Canada West Coast_981	<Null>	<Null>	<Null>	0	<Null>	53.6476	-129.142	0	0	0	0	0	<Null>	0	0	0	0	0	<Null>	0	0	0	<Null>	<Null>	<Null>	0	<Null>	0	<Null>	0	<Null>	<Null>	<Null>	<Null>	<Null>	<Null>	<Null>	<Null>	Fjord Seascape - Unconsolidated sidewall	<Null>	<Null>	<Null>	Geological Survey of Canada - Pacific
1081	1043	Point	<Null>	<Null>	Canada West Coast	Canada West Coast_982	<Null>	<Null>	<Null>	0	<Null>	53.6506	-129.128	0	0	0	0	0	<Null>	0	0	0	0	0	<Null>	0	0	0	<Null>	<Null>	<Null>	0	<Null>	0	<Null>	0	<Null>	<Null>	<Null>	<Null>	<Null>	<Null>	<Null>	<Null>	Fjord Seascape - Deltas	<Null>	<Null>	<Null>	Geological Survey of Canada - Pacific
1082	1044	Point	<Null>	<Null>	Canada West Coast	Canada West Coast_983	<Null>	<Null>	<Null>	0	<Null>	53.6547	-129.123	0	0	0	0	0	<Null>	0	0	0	0	0	<Null>	0	0	0	<Null>	<Null>	<Null>	0	<Null>	0	<Null>	0	<Null>	<Null>	<Null>	<Null>	<Null>	<Null>	<Null>	<Null>	Fjord Seascape - Deltas	<Null>	<Null>	<Null>	Geological Survey of Canada - Pacific
1083	1045	Point	<Null>	<Null>	Canada West Coast	Canada West Coast_984	<Null>	<Null>	<Null>	0	<Null>	53.3801	-129.34	0	0	0	0	0	<Null>	0	0	0	0	0	<Null>	0	0	0	<Null>	<Null>	<Null>	0	<Null>	0	<Null>	0	<Null>	<Null>	<Null>	<Null>	<Null>	<Null>	<Null>	<Null>	Fjord Seascape - Bedrock sidewall	<Null>	<Null>	<Null>	Geological Survey of Canada - Pacific
1084	1046	Point	<Null>	<Null>	Canada West Coast	Canada West Coast_985	<Null>	<Null>	<Null>	0	<Null>	53.4523	-129.453	0	0	0	0	0	<Null>	0	0	0	0	0	<Null>	0	0	0	<Null>	<Null>	<Null>	0	<Null>	0	<Null>	0	<Null>	<Null>	<Null>	<Null>	<Null>	<Null>	<Null>	<Null>	Fjord Seascape - Unconsolidated sidewall	<Null>	<Null>	<Null>	Geological Survey of Canada - Pacific
1085	1047	Point	<Null>	<Null>	Canada West Coast	Canada West Coast_986	<Null>	<Null>	<Null>	0	<Null>	53.4324	-129.424	0	0	0	0	0	<Null>	0	0	0	0	0	<Null>	0	0	0	<Null>	<Null>	<Null>	0	<Null>	0	<Null>	0	<Null>	<Null>	<Null>	<Null>	<Null>	<Null>	<Null>	<Null>	Fjord Seascape - Unconsolidated sidewall	<Null>	<Null>	<Null>	Geological Survey of Canada - Pacific
1086	1048	Point	<Null>	<Null>	Canada West Coast	Canada West Coast_987	<Null>	<Null>	<Null>	0	<Null>	53.4387	-129.433	0	0	0	0	0	<Null>	0	0	0	0	0	<Null>	0	0	0	<Null>	<Null>	<Null>	0	<Null>	0	<Null>	0	<Null>	<Null>	<Null>	<Null>	<Null>	<Null>	<Null>	<Null>	Fjord Seascape - Bedrock sidewall	<Null>	<Null>	<Null>	Geological Survey of Canada - Pacific
1087	1049	Point	<Null>	<Null>	Canada West Coast	Canada West Coast_988	<Null>	<Null>	<Null>	0	<Null>	53.4346	-129.427	0	0	0	0	0	<Null>	0	0	0	0	0	<Null>	0	0	0	<Null>	<Null>	<Null>	0	<Null>	0	<Null>	0	<Null>	<Null>	<Null>	<Null>	<Null>	<Null>	<Null>	<Null>	Fjord Seascape - Unconsolidated sidewall	<Null>	<Null>	<Null>	Geological Survey of Canada - Pacific
1088	1050	Point	<Null>	<Null>	Canada West Coast	Canada West Coast_989	<Null>	<Null>	<Null>	0	<Null>	53.5067	-129.546	0	0	0	0	0	<Null>	0	0	0	0	0	<Null>	0	0	0	<Null>	<Null>	<Null>	0	<Null>	0	<Null>	0	<Null>	<Null>	<Null>	<Null>	<Null>	<Null>	<Null>	<Null>	Fjord Seascape - Unconsolidated sidewall	<Null>	<Null>	<Null>	Geological Survey of Canada - Pacific
1089	1051	Point	<Null>	<Null>	Canada West Coast	Canada West Coast_990	<Null>	<Null>	<Null>	0	<Null>	53.4936	-129.536	0	0	0	0	0	<Null>	0	0	0	0	0	<Null>	0	0	0	<Null>	<Null>	<Null>	0	<Null>	0	<Null>	0	<Null>	<Null>	<Null>	<Null>	<Null>	<Null>	<Null>	<Null>	Fjord Seascape - Unconsolidated sidewall	<Null>	<Null>	<Null>	Geological Survey of Canada - Pacific
1090	1052	Point	<Null>	<Null>	Canada West Coast	Canada West Coast_991	<Null>	<Null>	<Null>	0	<Null>	53.5513	-129.628	0	0	0	0	0	<Null>	0	0	0	0	0	<Null>	0	0	0	<Null>	<Null>	<Null>	0	<Null>	0	<Null>	0	<Null>	<Null>	<Null>	<Null>	<Null>	<Null>	<Null>	<Null>	<Null>	<Null>	<Null>	<Null>	Geological Survey of Canada - Pacific
1091	1053	Point	<Null>	<Null>	Canada West Coast	Canada West Coast_992	<Null>	<Null>	<Null>	0	<Null>	53.4876	-129.517	0	0	0	0	0	<Null>	0	0	0	0	0	<Null>	0	0	0	<Null>	<Null>	<Null>	0	<Null>	0	<Null>	0	<Null>	<Null>	<Null>	<Null>	<Null>	<Null>	<Null>	<Null>	Fjord Seascape - Unconsolidated sidewall	<Null>	<Null>	<Null>	Geological Survey of Canada - Pacific
1092	1054	Point	<Null>	<Null>	Canada West Coast	Canada West Coast_993	<Null>	<Null>	<Null>	0	<Null>	53.4806	-129.066	0	0	0	0	0	<Null>	0	0	0	0	0	<Null>	0	0	0	<Null>	<Null>	<Null>	0	<Null>	0	<Null>	0	<Null>	<Null>	<Null>	<Null>	<Null>	<Null>	<Null>	<Null>	Fjord Seascape - Deltas	<Null>	<Null>	<Null>	Geological Survey of Canada - Pacific
1093	1055	Point	<Null>	<Null>	Canada West Coast	Canada West Coast_994	<Null>	<Null>	<Null>	0	<Null>	53.4548	-129.059	0	0	0	0	0	<Null>	0	0	0	0	0	<Null>	0	0	0	<Null>	<Null>	<Null>	0	<Null>	0	<Null>	0	<Null>	<Null>	<Null>	<Null>	<Null>	<Null>	<Null>	<Null>	Fjord Seascape - Deltas	<Null>	<Null>	<Null>	Geological Survey of Canada - Pacific
1094	1056	Point	<Null>	<Null>	Canada West Coast	Canada West Coast_995	<Null>	<Null>	<Null>	0	<Null>	53.4489	-129.06	0	0	0	0	0	<Null>	0	0	0	0	0	<Null>	0	0	0	<Null>	<Null>	<Null>	0	<Null>	0	<Null>	0	<Null>	<Null>	<Null>	<Null>	<Null>	<Null>	<Null>	<Null>	Fjord Seascape - Winnowed Scoured Seafloor	<Null>	<Null>	<Null>	Geological Survey of Canada - Pacific
1095	1057	Point	<Null>	<Null>	Canada West Coast	Canada West Coast_996	<Null>	<Null>	<Null>	0	<Null>	53.4435	-129.064	0	0	0	0	0	<Null>	0	0	0	0	0	<Null>	0	0	0	<Null>	<Null>	<Null>	0	<Null>	0	<Null>	0	<Null>	<Null>	<Null>	<Null>	<Null>	<Null>	<Null>	<Null>	Fjord Seascape - Deltas	<Null>	<Null>	<Null>	Geological Survey of Canada - Pacific
1096	1058	Point	<Null>	<Null>	Canada West Coast	Canada West Coast_997	<Null>	<Null>	<Null>	0	<Null>	53.4397	-129.07	0	0	0	0	0	<Null>	0	0	0	0	0	<Null>	0	0	0	<Null>	<Null>	<Null>	0	<Null>	0	<Null>	0	<Null>	<Null>	<Null>	<Null>	<Null>	<Null>	<Null>	<Null>	Fjord Seascape - Deltas	<Null>	<Null>	<Null>	Geological Survey of Canada - Pacific
1097	1059	Point	<Null>	<Null>	Canada West Coast	Canada West Coast_998	<Null>	<Null>	<Null>	0	<Null>	53.4646	-129.059	0	0	0	0	0	<Null>	0	0	0	0	0	<Null>	0	0	0	<Null>	<Null>	<Null>	0	<Null>	0	<Null>	0	<Null>	<Null>	<Null>	<Null>	<Null>	<Null>	<Null>	<Null>	Fjord Seascape - Winnowed Scoured Seafloor	<Null>	<Null>	<Null>	Geological Survey of Canada - Pacific
1098	1060	Point	<Null>	<Null>	Canada West Coast	Canada West Coast_999	<Null>	<Null>	<Null>	0	<Null>	53.5127	-129.072	0	0	0	0	0	<Null>	0	0	0	0	0	<Null>	0	0	0	<Null>	<Null>	<Null>	0	<Null>	0	<Null>	0	<Null>	<Null>	<Null>	<Null>	<Null>	<Null>	<Null>	<Null>	Fjord Seascape - Deltas	<Null>	<Null>	<Null>	Geological Survey of Canada - Pacific
1099	1061	Point	<Null>	<Null>	Canada West Coast	Canada West Coast_1000	<Null>	<Null>	<Null>	0	<Null>	53.4972	-128.99	0	0	0	0	0	<Null>	0	0	0	0	0	<Null>	0	0	0	<Null>	<Null>	<Null>	0	<Null>	0	<Null>	0	<Null>	<Null>	<Null>	<Null>	<Null>	<Null>	<Null>	<Null>	Fjord Seascape - Winnowed Scoured Seafloor	<Null>	<Null>	<Null>	Geological Survey of Canada - Pacific
1100	1062	Point	<Null>	<Null>	Canada West Coast	Canada West Coast_1001	<Null>	<Null>	<Null>	0	<Null>	53.5455	-129.028	0	0	0	0	0	<Null>	0	0	0	0	0	<Null>	0	0	0	<Null>	<Null>	<Null>	0	<Null>	0	<Null>	0	<Null>	<Null>	<Null>	<Null>	<Null>	<Null>	<Null>	<Null>	Fjord Seascape - Debris flows	<Null>	<Null>	<Null>	Geological Survey of Canada - Pacific
1101	1063	Point	<Null>	<Null>	Canada West Coast	Canada West Coast_1002	<Null>	<Null>	<Null>	0	<Null>	53.4807	-129.095	0	0	0	0	0	<Null>	0	0	0	0	0	<Null>	0	0	0	<Null>	<Null>	<Null>	0	<Null>	0	<Null>	0	<Null>	<Null>	<Null>	<Null>	<Null>	<Null>	<Null>	<Null>	Fjord Seascape - Deltas	<Null>	<Null>	<Null>	Geological Survey of Canada - Pacific
1102	1064	Point	<Null>	<Null>	Canada West Coast	Canada West Coast_1003	<Null>	<Null>	<Null>	0	<Null>	53.9412	-130.172	0	0	0	0	0	<Null>	0	0	0	0	0	<Null>	0	0	0	<Null>	<Null>	<Null>	0	<Null>	0	<Null>	0	<Null>	<Null>	<Null>	<Null>	<Null>	<Null>	<Null>	<Null>	<Null>	<Null>	<Null>	<Null>	Geological Survey of Canada - Pacific
1103	1065	Point	<Null>	<Null>	Canada West Coast	Canada West Coast_1004	<Null>	<Null>	<Null>	0	<Null>	53.8659	-128.722	0	0	0	0	0	<Null>	0	0	0	0	0	<Null>	0	0	0	<Null>	<Null>	<Null>	0	<Null>	0	<Null>	0	<Null>	<Null>	<Null>	<Null>	<Null>	<Null>	<Null>	<Null>	Fjord Seascape - Unconsolidated sidewall	<Null>	<Null>	<Null>	Geological Survey of Canada - Pacific
1104	1066	Point	<Null>	<Null>	Canada West Coast	Canada West Coast_1005	<Null>	<Null>	<Null>	0	<Null>	50.7815	-127.516	0	0	0	0	0	<Null>	0	0	0	0	0	<Null>	0	0	0	<Null>	<Null>	<Null>	0	<Null>	0	<Null>	0	<Null>	<Null>	<Null>	<Null>	<Null>	<Null>	<Null>	<Null>	<Null>	<Null>	<Null>	<Null>	Geological Survey of Canada - Pacific
1105	1067	Point	<Null>	<Null>	Canada West Coast	Canada West Coast_1006	<Null>	<Null>	<Null>	0	<Null>	50.2571	-125.395	0	0	0	0	0	<Null>	0	0	0	0	0	<Null>	0	0	0	<Null>	<Null>	<Null>	0	<Null>	0	<Null>	0	<Null>	<Null>	<Null>	<Null>	<Null>	<Null>	<Null>	<Null>	<Null>	<Null>	<Null>	<Null>	Geological Survey of Canada - Pacific
1106	1068	Point	<Null>	<Null>	Canada West Coast	Canada West Coast_1007	<Null>	<Null>	<Null>	0	<Null>	50.7086	-125.692	0	0	0	0	0	<Null>	0	0	0	0	0	<Null>	0	0	0	<Null>	<Null>	<Null>	0	<Null>	0	<Null>	0	<Null>	<Null>	<Null>	<Null>	<Null>	<Null>	<Null>	<Null>	<Null>	<Null>	<Null>	<Null>	Geological Survey of Canada - Pacific
1107	1069	Point	<Null>	<Null>	Canada West Coast	Canada West Coast_1008	<Null>	<Null>	<Null>	0	<Null>	50.8687	-125.564	0	0	0	0	0	<Null>	0	0	0	0	0	<Null>	0	0	0	<Null>	<Null>	<Null>	0	<Null>	0	<Null>	0	<Null>	<Null>	<Null>	<Null>	<Null>	<Null>	<Null>	<Null>	<Null>	<Null>	<Null>	<Null>	Geological Survey of Canada - Pacific
1108	1070	Point	<Null>	<Null>	Canada West Coast	Canada West Coast_1009	<Null>	<Null>	<Null>	0	<Null>	50.8884	-125.54	0	0	0	0	0	<Null>	0	0	0	0	0	<Null>	0	0	0	<Null>	<Null>	<Null>	0	<Null>	0	<Null>	0	<Null>	<Null>	<Null>	<Null>	<Null>	<Null>	<Null>	<Null>	<Null>	<Null>	<Null>	<Null>	Geological Survey of Canada - Pacific
1109	1071	Point	<Null>	<Null>	Canada West Coast	Canada West Coast_1010	<Null>	<Null>	<Null>	0	<Null>	51.1127	-127.125	0	0	0	0	0	<Null>	0	0	0	0	0	<Null>	0	0	0	<Null>	<Null>	<Null>	0	<Null>	0	<Null>	0	<Null>	<Null>	<Null>	<Null>	<Null>	<Null>	<Null>	<Null>	<Null>	<Null>	<Null>	<Null>	Geological Survey of Canada - Pacific
1110	1072	Point	<Null>	<Null>	Canada West Coast	Canada West Coast_1011	<Null>	<Null>	<Null>	0	<Null>	53.8152	-128.712	0	0	0	0	0	<Null>	0	0	0	0	0	<Null>	0	0	0	<Null>	<Null>	<Null>	0	<Null>	0	<Null>	0	<Null>	<Null>	<Null>	<Null>	<Null>	<Null>	<Null>	<Null>	Fjord Seascape - Deltas	<Null>	<Null>	<Null>	Geological Survey of Canada - Pacific
1111	1073	Point	<Null>	<Null>	Canada West Coast	Canada West Coast_1012	<Null>	<Null>	<Null>	0	<Null>	53.776	-128.821	0	0	0	0	0	<Null>	0	0	0	0	0	<Null>	0	0	0	<Null>	<Null>	<Null>	0	<Null>	0	<Null>	0	<Null>	<Null>	<Null>	<Null>	<Null>	<Null>	<Null>	<Null>	Fjord Seascape - Unconsolidated sidewall	<Null>	<Null>	<Null>	Geological Survey of Canada - Pacific
1112	1074	Point	<Null>	<Null>	Canada West Coast	Canada West Coast_1013	<Null>	<Null>	<Null>	0	<Null>	53.7488	-128.958	0	0	0	0	0	<Null>	0	0	0	0	0	<Null>	0	0	0	<Null>	<Null>	<Null>	0	<Null>	0	<Null>	0	<Null>	<Null>	<Null>	<Null>	<Null>	<Null>	<Null>	<Null>	Fjord Seascape - Deltas	<Null>	<Null>	<Null>	Geological Survey of Canada - Pacific
1113	1075	Point	<Null>	<Null>	Canada West Coast	Canada West Coast_1014	<Null>	<Null>	<Null>	0	<Null>	53.7539	-128.944	0	0	0	0	0	<Null>	0	0	0	0	0	<Null>	0	0	0	<Null>	<Null>	<Null>	0	<Null>	0	<Null>	0	<Null>	<Null>	<Null>	<Null>	<Null>	<Null>	<Null>	<Null>	Fjord Seascape - Deltas	<Null>	<Null>	<Null>	Geological Survey of Canada - Pacific
1114	1076	Point	<Null>	<Null>	Canada West Coast	Canada West Coast_1015	<Null>	<Null>	<Null>	0	<Null>	53.8055	-129.986	0	0	0	0	0	<Null>	0	0	0	0	0	<Null>	0	0	0	<Null>	<Null>	<Null>	0	<Null>	0	<Null>	0	<Null>	<Null>	<Null>	<Null>	<Null>	<Null>	<Null>	<Null>	<Null>	<Null>	<Null>	<Null>	Geological Survey of Canada - Pacific
1115	1077	Point	<Null>	<Null>	Canada West Coast	Canada West Coast_1016	<Null>	<Null>	<Null>	0	<Null>	53.8022	-129.977	0	0	0	0	0	<Null>	0	0	0	0	0	<Null>	0	0	0	<Null>	<Null>	<Null>	0	<Null>	0	<Null>	0	<Null>	<Null>	<Null>	<Null>	<Null>	<Null>	<Null>	<Null>	<Null>	<Null>	<Null>	<Null>	Geological Survey of Canada - Pacific
1116	1078	Point	<Null>	<Null>	Canada West Coast	Canada West Coast_1017	<Null>	<Null>	<Null>	0	<Null>	51.1714	-127.038	0	0	0	0	0	<Null>	0	0	0	0	0	<Null>	0	0	0	<Null>	<Null>	<Null>	0	<Null>	0	<Null>	0	<Null>	<Null>	<Null>	<Null>	<Null>	<Null>	<Null>	<Null>	<Null>	<Null>	<Null>	<Null>	Geological Survey of Canada - Pacific
1117	1079	Point	<Null>	<Null>	Canada West Coast	Canada West Coast_1018	<Null>	<Null>	<Null>	0	<Null>	53.7568	-128.934	0	0	0	0	0	<Null>	0	0	0	0	0	<Null>	0	0	0	<Null>	<Null>	<Null>	0	<Null>	0	<Null>	0	<Null>	<Null>	<Null>	<Null>	<Null>	<Null>	<Null>	<Null>	Fjord Seascape - Winnowed Scoured Seafloor	<Null>	<Null>	<Null>	Geological Survey of Canada - Pacific
1118	1080	Point	<Null>	<Null>	Canada West Coast	Canada West Coast_1019	<Null>	<Null>	<Null>	0	<Null>	53.7446	-128.97	0	0	0	0	0	<Null>	0	0	0	0	0	<Null>	0	0	0	<Null>	<Null>	<Null>	0	<Null>	0	<Null>	0	<Null>	<Null>	<Null>	<Null>	<Null>	<Null>	<Null>	<Null>	Fjord Seascape - Deltas	<Null>	<Null>	<Null>	Geological Survey of Canada - Pacific
1119	1081	Point	<Null>	<Null>	Canada West Coast	Canada West Coast_1020	<Null>	<Null>	<Null>	0	<Null>	53.7652	-128.976	0	0	0	0	0	<Null>	0	0	0	0	0	<Null>	0	0	0	<Null>	<Null>	<Null>	0	<Null>	0	<Null>	0	<Null>	<Null>	<Null>	<Null>	<Null>	<Null>	<Null>	<Null>	Fjord Seascape - Unconsolidated sidewall	<Null>	<Null>	<Null>	Geological Survey of Canada - Pacific
1120	1082	Point	<Null>	<Null>	Canada West Coast	Canada West Coast_1021	<Null>	<Null>	<Null>	0	<Null>	51.0617	-127.037	0	0	0	0	0	<Null>	0	0	0	0	0	<Null>	0	0	0	<Null>	<Null>	<Null>	0	<Null>	0	<Null>	0	<Null>	<Null>	<Null>	<Null>	<Null>	<Null>	<Null>	<Null>	<Null>	<Null>	<Null>	<Null>	Geological Survey of Canada - Pacific
1121	1083	Point	<Null>	<Null>	Canada West Coast	Canada West Coast_1022	<Null>	<Null>	<Null>	0	<Null>	51.0557	-127.065	0	0	0	0	0	<Null>	0	0	0	0	0	<Null>	0	0	0	<Null>	<Null>	<Null>	0	<Null>	0	<Null>	0	<Null>	<Null>	<Null>	<Null>	<Null>	<Null>	<Null>	<Null>	<Null>	<Null>	<Null>	<Null>	Geological Survey of Canada - Pacific
1122	1084	Point	<Null>	<Null>	Canada West Coast	Canada West Coast_1023	<Null>	<Null>	<Null>	0	<Null>	51.0528	-127.089	0	0	0	0	0	<Null>	0	0	0	0	0	<Null>	0	0	0	<Null>	<Null>	<Null>	0	<Null>	0	<Null>	0	<Null>	<Null>	<Null>	<Null>	<Null>	<Null>	<Null>	<Null>	<Null>	<Null>	<Null>	<Null>	Geological Survey of Canada - Pacific
1123	1085	Point	<Null>	<Null>	Canada West Coast	Canada West Coast_1024	<Null>	<Null>	<Null>	0	<Null>	51.0489	-127.123	0	0	0	0	0	<Null>	0	0	0	0	0	<Null>	0	0	0	<Null>	<Null>	<Null>	0	<Null>	0	<Null>	0	<Null>	<Null>	<Null>	<Null>	<Null>	<Null>	<Null>	<Null>	<Null>	<Null>	<Null>	<Null>	Geological Survey of Canada - Pacific
1124	1086	Point	<Null>	<Null>	Canada West Coast	Canada West Coast_1025	<Null>	<Null>	<Null>	0	<Null>	51.0439	-127.212	0	0	0	0	0	<Null>	0	0	0	0	0	<Null>	0	0	0	<Null>	<Null>	<Null>	0	<Null>	0	<Null>	0	<Null>	<Null>	<Null>	<Null>	<Null>	<Null>	<Null>	<Null>	<Null>	<Null>	<Null>	<Null>	Geological Survey of Canada - Pacific
1125	1087	Point	<Null>	<Null>	Canada West Coast	Canada West Coast_1026	<Null>	<Null>	<Null>	0	<Null>	51.0448	-127.288	0	0	0	0	0	<Null>	0	0	0	0	0	<Null>	0	0	0	<Null>	<Null>	<Null>	0	<Null>	0	<Null>	0	<Null>	<Null>	<Null>	<Null>	<Null>	<Null>	<Null>	<Null>	<Null>	<Null>	<Null>	<Null>	Geological Survey of Canada - Pacific
1126	1088	Point	<Null>	<Null>	Canada West Coast	Canada West Coast_1027	<Null>	<Null>	<Null>	0	<Null>	51.0446	-127.254	0	0	0	0	0	<Null>	0	0	0	0	0	<Null>	0	0	0	<Null>	<Null>	<Null>	0	<Null>	0	<Null>	0	<Null>	<Null>	<Null>	<Null>	<Null>	<Null>	<Null>	<Null>	<Null>	<Null>	<Null>	<Null>	Geological Survey of Canada - Pacific
1127	1089	Point	<Null>	<Null>	Canada West Coast	Canada West Coast_1028	<Null>	<Null>	<Null>	0	<Null>	51.0504	-127.263	0	0	0	0	0	<Null>	0	0	0	0	0	<Null>	0	0	0	<Null>	<Null>	<Null>	0	<Null>	0	<Null>	0	<Null>	<Null>	<Null>	<Null>	<Null>	<Null>	<Null>	<Null>	<Null>	<Null>	<Null>	<Null>	Geological Survey of Canada - Pacific
1128	1090	Point	<Null>	<Null>	Canada West Coast	Canada West Coast_1029	<Null>	<Null>	<Null>	0	<Null>	51.0509	-127.207	0	0	0	0	0	<Null>	0	0	0	0	0	<Null>	0	0	0	<Null>	<Null>	<Null>	0	<Null>	0	<Null>	0	<Null>	<Null>	<Null>	<Null>	<Null>	<Null>	<Null>	<Null>	<Null>	<Null>	<Null>	<Null>	Geological Survey of Canada - Pacific
1129	1091	Point	<Null>	<Null>	Canada West Coast	Canada West Coast_1030	<Null>	<Null>	<Null>	0	<Null>	51.0433	-127.151	0	0	0	0	0	<Null>	0	0	0	0	0	<Null>	0	0	0	<Null>	<Null>	<Null>	0	<Null>	0	<Null>	0	<Null>	<Null>	<Null>	<Null>	<Null>	<Null>	<Null>	<Null>	<Null>	<Null>	<Null>	<Null>	Geological Survey of Canada - Pacific
1130	1092	Point	<Null>	<Null>	Canada West Coast	Canada West Coast_1031	<Null>	<Null>	<Null>	0	<Null>	51.0578	-126.997	0	0	0	0	0	<Null>	0	0	0	0	0	<Null>	0	0	0	<Null>	<Null>	<Null>	0	<Null>	0	<Null>	0	<Null>	<Null>	<Null>	<Null>	<Null>	<Null>	<Null>	<Null>	<Null>	<Null>	<Null>	<Null>	Geological Survey of Canada - Pacific
1131	1093	Point	<Null>	<Null>	Canada West Coast	Canada West Coast_1032	<Null>	<Null>	<Null>	0	<Null>	51.0575	-126.988	0	0	0	0	0	<Null>	0	0	0	0	0	<Null>	0	0	0	<Null>	<Null>	<Null>	0	<Null>	0	<Null>	0	<Null>	<Null>	<Null>	<Null>	<Null>	<Null>	<Null>	<Null>	<Null>	<Null>	<Null>	<Null>	Geological Survey of Canada - Pacific
1132	1094	Point	<Null>	<Null>	Canada West Coast	Canada West Coast_1033	<Null>	<Null>	<Null>	0	<Null>	51.0574	-126.97	0	0	0	0	0	<Null>	0	0	0	0	0	<Null>	0	0	0	<Null>	<Null>	<Null>	0	<Null>	0	<Null>	0	<Null>	<Null>	<Null>	<Null>	<Null>	<Null>	<Null>	<Null>	<Null>	<Null>	<Null>	<Null>	Geological Survey of Canada - Pacific
1133	1095	Point	<Null>	<Null>	Canada West Coast	Canada West Coast_1034	<Null>	<Null>	<Null>	0	<Null>	51.0576	-126.961	0	0	0	0	0	<Null>	0	0	0	0	0	<Null>	0	0	0	<Null>	<Null>	<Null>	0	<Null>	0	<Null>	0	<Null>	<Null>	<Null>	<Null>	<Null>	<Null>	<Null>	<Null>	<Null>	<Null>	<Null>	<Null>	Geological Survey of Canada - Pacific
1134	1096	Point	<Null>	<Null>	Canada West Coast	Canada West Coast_1035	<Null>	<Null>	<Null>	0	<Null>	51.0604	-126.735	0	0	0	0	0	<Null>	0	0	0	0	0	<Null>	0	0	0	<Null>	<Null>	<Null>	0	<Null>	0	<Null>	0	<Null>	<Null>	<Null>	<Null>	<Null>	<Null>	<Null>	<Null>	<Null>	<Null>	<Null>	<Null>	Geological Survey of Canada - Pacific
1135	1097	Point	<Null>	<Null>	Canada West Coast	Canada West Coast_1036	<Null>	<Null>	<Null>	0	<Null>	51.0362	-126.71	0	0	0	0	0	<Null>	0	0	0	0	0	<Null>	0	0	0	<Null>	<Null>	<Null>	0	<Null>	0	<Null>	0	<Null>	<Null>	<Null>	<Null>	<Null>	<Null>	<Null>	<Null>	<Null>	<Null>	<Null>	<Null>	Geological Survey of Canada - Pacific
1136	1098	Point	<Null>	<Null>	Canada West Coast	Canada West Coast_1037	<Null>	<Null>	<Null>	0	<Null>	51.0154	-126.703	0	0	0	0	0	<Null>	0	0	0	0	0	<Null>	0	0	0	<Null>	<Null>	<Null>	0	<Null>	0	<Null>	0	<Null>	<Null>	<Null>	<Null>	<Null>	<Null>	<Null>	<Null>	<Null>	<Null>	<Null>	<Null>	Geological Survey of Canada - Pacific
1137	1099	Point	<Null>	<Null>	Canada West Coast	Canada West Coast_1038	<Null>	<Null>	<Null>	0	<Null>	51.0228	-126.706	0	0	0	0	0	<Null>	0	0	0	0	0	<Null>	0	0	0	<Null>	<Null>	<Null>	0	<Null>	0	<Null>	0	<Null>	<Null>	<Null>	<Null>	<Null>	<Null>	<Null>	<Null>	<Null>	<Null>	<Null>	<Null>	Geological Survey of Canada - Pacific
1138	1100	Point	<Null>	<Null>	Canada West Coast	Canada West Coast_1039	<Null>	<Null>	<Null>	0	<Null>	51.0309	-126.711	0	0	0	0	0	<Null>	0	0	0	0	0	<Null>	0	0	0	<Null>	<Null>	<Null>	0	<Null>	0	<Null>	0	<Null>	<Null>	<Null>	<Null>	<Null>	<Null>	<Null>	<Null>	<Null>	<Null>	<Null>	<Null>	Geological Survey of Canada - Pacific
1139	1101	Point	<Null>	<Null>	Canada West Coast	Canada West Coast_1040	<Null>	<Null>	<Null>	0	<Null>	50.9964	-126.702	0	0	0	0	0	<Null>	0	0	0	0	0	<Null>	0	0	0	<Null>	<Null>	<Null>	0	<Null>	0	<Null>	0	<Null>	<Null>	<Null>	<Null>	<Null>	<Null>	<Null>	<Null>	<Null>	<Null>	<Null>	<Null>	Geological Survey of Canada - Pacific
1140	1102	Point	<Null>	<Null>	Canada West Coast	Canada West Coast_1041	<Null>	<Null>	<Null>	0	<Null>	51.1379	-127.494	0	0	0	0	0	<Null>	0	0	0	0	0	<Null>	0	0	0	<Null>	<Null>	<Null>	0	<Null>	0	<Null>	0	<Null>	<Null>	<Null>	<Null>	<Null>	<Null>	<Null>	<Null>	<Null>	<Null>	<Null>	<Null>	Geological Survey of Canada - Pacific
1141	1103	Point	<Null>	<Null>	Canada West Coast	Canada West Coast_1042	<Null>	<Null>	<Null>	0	<Null>	51.1271	-127.465	0	0	0	0	0	<Null>	0	0	0	0	0	<Null>	0	0	0	<Null>	<Null>	<Null>	0	<Null>	0	<Null>	0	<Null>	<Null>	<Null>	<Null>	<Null>	<Null>	<Null>	<Null>	<Null>	<Null>	<Null>	<Null>	Geological Survey of Canada - Pacific
1142	1104	Point	<Null>	<Null>	Canada West Coast	Canada West Coast_1043	<Null>	<Null>	<Null>	0	<Null>	51.1257	-127.448	0	0	0	0	0	<Null>	0	0	0	0	0	<Null>	0	0	0	<Null>	<Null>	<Null>	0	<Null>	0	<Null>	0	<Null>	<Null>	<Null>	<Null>	<Null>	<Null>	<Null>	<Null>	<Null>	<Null>	<Null>	<Null>	Geological Survey of Canada - Pacific
1143	1105	Point	<Null>	<Null>	Canada West Coast	Canada West Coast_1044	<Null>	<Null>	<Null>	0	<Null>	51.1259	-127.399	0	0	0	0	0	<Null>	0	0	0	0	0	<Null>	0	0	0	<Null>	<Null>	<Null>	0	<Null>	0	<Null>	0	<Null>	<Null>	<Null>	<Null>	<Null>	<Null>	<Null>	<Null>	<Null>	<Null>	<Null>	<Null>	Geological Survey of Canada - Pacific
1144	1106	Point	<Null>	<Null>	Canada West Coast	Canada West Coast_1045	<Null>	<Null>	<Null>	0	<Null>	51.1272	-127.348	0	0	0	0	0	<Null>	0	0	0	0	0	<Null>	0	0	0	<Null>	<Null>	<Null>	0	<Null>	0	<Null>	0	<Null>	<Null>	<Null>	<Null>	<Null>	<Null>	<Null>	<Null>	<Null>	<Null>	<Null>	<Null>	Geological Survey of Canada - Pacific
1145	1107	Point	<Null>	<Null>	Canada West Coast	Canada West Coast_1046	<Null>	<Null>	<Null>	0	<Null>	51.1365	-127.306	0	0	0	0	0	<Null>	0	0	0	0	0	<Null>	0	0	0	<Null>	<Null>	<Null>	0	<Null>	0	<Null>	0	<Null>	<Null>	<Null>	<Null>	<Null>	<Null>	<Null>	<Null>	<Null>	<Null>	<Null>	<Null>	Geological Survey of Canada - Pacific
1146	1108	Point	<Null>	<Null>	Canada West Coast	Canada West Coast_1047	<Null>	<Null>	<Null>	0	<Null>	51.1348	-127.341	0	0	0	0	0	<Null>	0	0	0	0	0	<Null>	0	0	0	<Null>	<Null>	<Null>	0	<Null>	0	<Null>	0	<Null>	<Null>	<Null>	<Null>	<Null>	<Null>	<Null>	<Null>	<Null>	<Null>	<Null>	<Null>	Geological Survey of Canada - Pacific
1147	1109	Point	<Null>	<Null>	Canada West Coast	Canada West Coast_1048	<Null>	<Null>	<Null>	0	<Null>	51.1357	-127.278	0	0	0	0	0	<Null>	0	0	0	0	0	<Null>	0	0	0	<Null>	<Null>	<Null>	0	<Null>	0	<Null>	0	<Null>	<Null>	<Null>	<Null>	<Null>	<Null>	<Null>	<Null>	<Null>	<Null>	<Null>	<Null>	Geological Survey of Canada - Pacific
1148	1110	Point	<Null>	<Null>	Canada West Coast	Canada West Coast_1049	<Null>	<Null>	<Null>	0	<Null>	51.1312	-127.257	0	0	0	0	0	<Null>	0	0	0	0	0	<Null>	0	0	0	<Null>	<Null>	<Null>	0	<Null>	0	<Null>	0	<Null>	<Null>	<Null>	<Null>	<Null>	<Null>	<Null>	<Null>	<Null>	<Null>	<Null>	<Null>	Geological Survey of Canada - Pacific
1149	1111	Point	<Null>	<Null>	Canada West Coast	Canada West Coast_1050	<Null>	<Null>	<Null>	0	<Null>	51.1251	-127.236	0	0	0	0	0	<Null>	0	0	0	0	0	<Null>	0	0	0	<Null>	<Null>	<Null>	0	<Null>	0	<Null>	0	<Null>	<Null>	<Null>	<Null>	<Null>	<Null>	<Null>	<Null>	<Null>	<Null>	<Null>	<Null>	Geological Survey of Canada - Pacific
1150	1112	Point	<Null>	<Null>	Canada West Coast	Canada West Coast_1051	<Null>	<Null>	<Null>	0	<Null>	51.1255	-127.218	0	0	0	0	0	<Null>	0	0	0	0	0	<Null>	0	0	0	<Null>	<Null>	<Null>	0	<Null>	0	<Null>	0	<Null>	<Null>	<Null>	<Null>	<Null>	<Null>	<Null>	<Null>	<Null>	<Null>	<Null>	<Null>	Geological Survey of Canada - Pacific
1151	1113	Point	<Null>	<Null>	Canada West Coast	Canada West Coast_1052	<Null>	<Null>	<Null>	0	<Null>	51.1313	-127.224	0	0	0	0	0	<Null>	0	0	0	0	0	<Null>	0	0	0	<Null>	<Null>	<Null>	0	<Null>	0	<Null>	0	<Null>	<Null>	<Null>	<Null>	<Null>	<Null>	<Null>	<Null>	<Null>	<Null>	<Null>	<Null>	Geological Survey of Canada - Pacific
1152	1114	Point	<Null>	<Null>	Canada West Coast	Canada West Coast_1053	<Null>	<Null>	<Null>	0	<Null>	51.1304	-127.191	0	0	0	0	0	<Null>	0	0	0	0	0	<Null>	0	0	0	<Null>	<Null>	<Null>	0	<Null>	0	<Null>	0	<Null>	<Null>	<Null>	<Null>	<Null>	<Null>	<Null>	<Null>	<Null>	<Null>	<Null>	<Null>	Geological Survey of Canada - Pacific
1153	1115	Point	<Null>	<Null>	Canada West Coast	Canada West Coast_1054	<Null>	<Null>	<Null>	0	<Null>	51.1302	-127.179	0	0	0	0	0	<Null>	0	0	0	0	0	<Null>	0	0	0	<Null>	<Null>	<Null>	0	<Null>	0	<Null>	0	<Null>	<Null>	<Null>	<Null>	<Null>	<Null>	<Null>	<Null>	<Null>	<Null>	<Null>	<Null>	Geological Survey of Canada - Pacific
1006	1116	Point	<Null>	<Null>	Canada West Coast	Canada West Coast_1055	<Null>	<Null>	<Null>	0	<Null>	51.1256	-127.165	0	0	0	0	0	<Null>	0	0	0	0	0	<Null>	0	0	0	<Null>	<Null>	<Null>	0	<Null>	0	<Null>	0	<Null>	<Null>	<Null>	<Null>	<Null>	<Null>	<Null>	<Null>	<Null>	<Null>	<Null>	<Null>	Geological Survey of Canada - Pacific
1007	1117	Point	<Null>	<Null>	Canada West Coast	Canada West Coast_1056	<Null>	<Null>	<Null>	0	<Null>	51.1186	-127.175	0	0	0	0	0	<Null>	0	0	0	0	0	<Null>	0	0	0	<Null>	<Null>	<Null>	0	<Null>	0	<Null>	0	<Null>	<Null>	<Null>	<Null>	<Null>	<Null>	<Null>	<Null>	<Null>	<Null>	<Null>	<Null>	Geological Survey of Canada - Pacific
1008	1118	Point	<Null>	<Null>	Canada West Coast	Canada West Coast_1057	<Null>	<Null>	<Null>	0	<Null>	51.1119	-126.987	0	0	0	0	0	<Null>	0	0	0	0	0	<Null>	0	0	0	<Null>	<Null>	<Null>	0	<Null>	0	<Null>	0	<Null>	<Null>	<Null>	<Null>	<Null>	<Null>	<Null>	<Null>	<Null>	<Null>	<Null>	<Null>	Geological Survey of Canada - Pacific
1009	1119	Point	<Null>	<Null>	Canada West Coast	Canada West Coast_1058	<Null>	<Null>	<Null>	0	<Null>	51.1111	-127.004	0	0	0	0	0	<Null>	0	0	0	0	0	<Null>	0	0	0	<Null>	<Null>	<Null>	0	<Null>	0	<Null>	0	<Null>	<Null>	<Null>	<Null>	<Null>	<Null>	<Null>	<Null>	<Null>	<Null>	<Null>	<Null>	Geological Survey of Canada - Pacific
1010	1120	Point	<Null>	<Null>	Canada West Coast	Canada West Coast_1059	<Null>	<Null>	<Null>	0	<Null>	51.1117	-127.027	0	0	0	0	0	<Null>	0	0	0	0	0	<Null>	0	0	0	<Null>	<Null>	<Null>	0	<Null>	0	<Null>	0	<Null>	<Null>	<Null>	<Null>	<Null>	<Null>	<Null>	<Null>	<Null>	<Null>	<Null>	<Null>	Geological Survey of Canada - Pacific
1011	1121	Point	<Null>	<Null>	Canada West Coast	Canada West Coast_1060	<Null>	<Null>	<Null>	0	<Null>	51.1006	-126.815	0	0	0	0	0	<Null>	0	0	0	0	0	<Null>	0	0	0	<Null>	<Null>	<Null>	0	<Null>	0	<Null>	0	<Null>	<Null>	<Null>	<Null>	<Null>	<Null>	<Null>	<Null>	<Null>	<Null>	<Null>	<Null>	Geological Survey of Canada - Pacific
1012	1122	Point	<Null>	<Null>	Canada West Coast	Canada West Coast_1061	<Null>	<Null>	<Null>	0	<Null>	51.0918	-126.866	0	0	0	0	0	<Null>	0	0	0	0	0	<Null>	0	0	0	<Null>	<Null>	<Null>	0	<Null>	0	<Null>	0	<Null>	<Null>	<Null>	<Null>	<Null>	<Null>	<Null>	<Null>	<Null>	<Null>	<Null>	<Null>	Geological Survey of Canada - Pacific
1013	1123	Point	<Null>	<Null>	Canada West Coast	Canada West Coast_1062	<Null>	<Null>	<Null>	0	<Null>	51.0668	-126.818	0	0	0	0	0	<Null>	0	0	0	0	0	<Null>	0	0	0	<Null>	<Null>	<Null>	0	<Null>	0	<Null>	0	<Null>	<Null>	<Null>	<Null>	<Null>	<Null>	<Null>	<Null>	<Null>	<Null>	<Null>	<Null>	Geological Survey of Canada - Pacific
1014	1124	Point	<Null>	<Null>	Canada West Coast	Canada West Coast_1063	<Null>	<Null>	<Null>	0	<Null>	51.0625	-126.93	0	0	0	0	0	<Null>	0	0	0	0	0	<Null>	0	0	0	<Null>	<Null>	<Null>	0	<Null>	0	<Null>	0	<Null>	<Null>	<Null>	<Null>	<Null>	<Null>	<Null>	<Null>	<Null>	<Null>	<Null>	<Null>	Geological Survey of Canada - Pacific
1015	1125	Point	<Null>	<Null>	Canada West Coast	Canada West Coast_1064	<Null>	<Null>	<Null>	0	<Null>	51.0659	-126.966	0	0	0	0	0	<Null>	0	0	0	0	0	<Null>	0	0	0	<Null>	<Null>	<Null>	0	<Null>	0	<Null>	0	<Null>	<Null>	<Null>	<Null>	<Null>	<Null>	<Null>	<Null>	<Null>	<Null>	<Null>	<Null>	Geological Survey of Canada - Pacific
1016	1126	Point	<Null>	<Null>	Canada West Coast	Canada West Coast_1065	<Null>	<Null>	<Null>	0	<Null>	51.0643	-126.978	0	0	0	0	0	<Null>	0	0	0	0	0	<Null>	0	0	0	<Null>	<Null>	<Null>	0	<Null>	0	<Null>	0	<Null>	<Null>	<Null>	<Null>	<Null>	<Null>	<Null>	<Null>	<Null>	<Null>	<Null>	<Null>	Geological Survey of Canada - Pacific
1017	1127	Point	<Null>	<Null>	Canada West Coast	Canada West Coast_1066	<Null>	<Null>	<Null>	0	<Null>	51.0679	-126.942	0	0	0	0	0	<Null>	0	0	0	0	0	<Null>	0	0	0	<Null>	<Null>	<Null>	0	<Null>	0	<Null>	0	<Null>	<Null>	<Null>	<Null>	<Null>	<Null>	<Null>	<Null>	<Null>	<Null>	<Null>	<Null>	Geological Survey of Canada - Pacific
1018	1128	Point	<Null>	<Null>	Canada West Coast	Canada West Coast_1067	<Null>	<Null>	<Null>	0	<Null>	51.0687	-126.786	0	0	0	0	0	<Null>	0	0	0	0	0	<Null>	0	0	0	<Null>	<Null>	<Null>	0	<Null>	0	<Null>	0	<Null>	<Null>	<Null>	<Null>	<Null>	<Null>	<Null>	<Null>	<Null>	<Null>	<Null>	<Null>	Geological Survey of Canada - Pacific
1019	1129	Point	<Null>	<Null>	Canada West Coast	Canada West Coast_1068	<Null>	<Null>	<Null>	0	<Null>	51.0715	-126.783	0	0	0	0	0	<Null>	0	0	0	0	0	<Null>	0	0	0	<Null>	<Null>	<Null>	0	<Null>	0	<Null>	0	<Null>	<Null>	<Null>	<Null>	<Null>	<Null>	<Null>	<Null>	<Null>	<Null>	<Null>	<Null>	Geological Survey of Canada - Pacific
1020	1130	Point	<Null>	<Null>	Canada West Coast	Canada West Coast_1069	<Null>	<Null>	<Null>	0	<Null>	51.0735	-126.78	0	0	0	0	0	<Null>	0	0	0	0	0	<Null>	0	0	0	<Null>	<Null>	<Null>	0	<Null>	0	<Null>	0	<Null>	<Null>	<Null>	<Null>	<Null>	<Null>	<Null>	<Null>	<Null>	<Null>	<Null>	<Null>	Geological Survey of Canada - Pacific
1154	1131	Point	<Null>	<Null>	Canada West Coast	Canada West Coast_1070	<Null>	<Null>	<Null>	0	<Null>	51.0749	-126.777	0	0	0	0	0	<Null>	0	0	0	0	0	<Null>	0	0	0	<Null>	<Null>	<Null>	0	<Null>	0	<Null>	0	<Null>	<Null>	<Null>	<Null>	<Null>	<Null>	<Null>	<Null>	<Null>	<Null>	<Null>	<Null>	Geological Survey of Canada - Pacific
1155	1132	Point	<Null>	<Null>	Canada West Coast	Canada West Coast_1071	<Null>	<Null>	<Null>	0	<Null>	51.0751	-126.78	0	0	0	0	0	<Null>	0	0	0	0	0	<Null>	0	0	0	<Null>	<Null>	<Null>	0	<Null>	0	<Null>	0	<Null>	<Null>	<Null>	<Null>	<Null>	<Null>	<Null>	<Null>	<Null>	<Null>	<Null>	<Null>	Geological Survey of Canada - Pacific
1156	1133	Point	<Null>	<Null>	Canada West Coast	Canada West Coast_1072	<Null>	<Null>	<Null>	0	<Null>	51.0729	-127.022	0	0	0	0	0	<Null>	0	0	0	0	0	<Null>	0	0	0	<Null>	<Null>	<Null>	0	<Null>	0	<Null>	0	<Null>	<Null>	<Null>	<Null>	<Null>	<Null>	<Null>	<Null>	<Null>	<Null>	<Null>	<Null>	Geological Survey of Canada - Pacific
1157	1134	Point	<Null>	<Null>	Canada West Coast	Canada West Coast_1073	<Null>	<Null>	<Null>	0	<Null>	53.3856	-129.182	0	0	0	0	0	<Null>	0	0	0	0	0	<Null>	0	0	0	<Null>	<Null>	<Null>	0	<Null>	0	<Null>	0	<Null>	<Null>	<Null>	<Null>	<Null>	<Null>	<Null>	<Null>	Fjord Seascape - Postglacial Mud	<Null>	<Null>	<Null>	Geological Survey of Canada - Pacific
1158	1135	Point	<Null>	<Null>	Canada West Coast	Canada West Coast_1074	<Null>	<Null>	<Null>	0	<Null>	51.3572	-127.146	0	0	0	0	0	<Null>	0	0	0	0	0	<Null>	0	0	0	<Null>	<Null>	<Null>	0	<Null>	0	<Null>	0	<Null>	<Null>	<Null>	<Null>	<Null>	<Null>	<Null>	<Null>	<Null>	<Null>	<Null>	<Null>	Geological Survey of Canada - Pacific
1159	1136	Point	<Null>	<Null>	Canada West Coast	Canada West Coast_1075	<Null>	<Null>	<Null>	0	<Null>	51.3641	-127.119	0	0	0	0	0	<Null>	0	0	0	0	0	<Null>	0	0	0	<Null>	<Null>	<Null>	0	<Null>	0	<Null>	0	<Null>	<Null>	<Null>	<Null>	<Null>	<Null>	<Null>	<Null>	<Null>	<Null>	<Null>	<Null>	Geological Survey of Canada - Pacific
1160	1137	Point	<Null>	<Null>	Canada West Coast	Canada West Coast_1076	<Null>	<Null>	<Null>	0	<Null>	51.3536	-127.103	0	0	0	0	0	<Null>	0	0	0	0	0	<Null>	0	0	0	<Null>	<Null>	<Null>	0	<Null>	0	<Null>	0	<Null>	<Null>	<Null>	<Null>	<Null>	<Null>	<Null>	<Null>	<Null>	<Null>	<Null>	<Null>	Geological Survey of Canada - Pacific
1161	1138	Point	<Null>	<Null>	Canada West Coast	Canada West Coast_1077	<Null>	<Null>	<Null>	0	<Null>	51.3537	-127.088	0	0	0	0	0	<Null>	0	0	0	0	0	<Null>	0	0	0	<Null>	<Null>	<Null>	0	<Null>	0	<Null>	0	<Null>	<Null>	<Null>	<Null>	<Null>	<Null>	<Null>	<Null>	<Null>	<Null>	<Null>	<Null>	Geological Survey of Canada - Pacific
1162	1139	Point	<Null>	<Null>	Canada West Coast	Canada West Coast_1078	<Null>	<Null>	<Null>	0	<Null>	51.3548	-127.095	0	0	0	0	0	<Null>	0	0	0	0	0	<Null>	0	0	0	<Null>	<Null>	<Null>	0	<Null>	0	<Null>	0	<Null>	<Null>	<Null>	<Null>	<Null>	<Null>	<Null>	<Null>	<Null>	<Null>	<Null>	<Null>	Geological Survey of Canada - Pacific
1163	1140	Point	<Null>	<Null>	Canada West Coast	Canada West Coast_1079	<Null>	<Null>	<Null>	0	<Null>	51.3527	-127.07	0	0	0	0	0	<Null>	0	0	0	0	0	<Null>	0	0	0	<Null>	<Null>	<Null>	0	<Null>	0	<Null>	0	<Null>	<Null>	<Null>	<Null>	<Null>	<Null>	<Null>	<Null>	<Null>	<Null>	<Null>	<Null>	Geological Survey of Canada - Pacific
1164	1141	Point	<Null>	<Null>	Canada West Coast	Canada West Coast_1080	<Null>	<Null>	<Null>	0	<Null>	54.0192	-130.22	0	0	0	0	0	<Null>	0	0	0	0	0	<Null>	0	0	0	<Null>	<Null>	<Null>	0	<Null>	0	<Null>	0	<Null>	<Null>	<Null>	<Null>	<Null>	<Null>	<Null>	<Null>	<Null>	<Null>	<Null>	<Null>	Geological Survey of Canada - Pacific
1165	1142	Point	<Null>	<Null>	Canada West Coast	Canada West Coast_1081	<Null>	<Null>	<Null>	0	<Null>	54.0217	-130.22	0	0	0	0	0	<Null>	0	0	0	0	0	<Null>	0	0	0	<Null>	<Null>	<Null>	0	<Null>	0	<Null>	0	<Null>	<Null>	<Null>	<Null>	<Null>	<Null>	<Null>	<Null>	<Null>	<Null>	<Null>	<Null>	Geological Survey of Canada - Pacific
1166	1143	Point	<Null>	<Null>	Canada West Coast	Canada West Coast_1082	<Null>	<Null>	<Null>	0	<Null>	54.018	-130.218	0	0	0	0	0	<Null>	0	0	0	0	0	<Null>	0	0	0	<Null>	<Null>	<Null>	0	<Null>	0	<Null>	0	<Null>	<Null>	<Null>	<Null>	<Null>	<Null>	<Null>	<Null>	<Null>	<Null>	<Null>	<Null>	Geological Survey of Canada - Pacific
1167	1144	Point	<Null>	<Null>	Canada West Coast	Canada West Coast_1083	<Null>	<Null>	<Null>	0	<Null>	54.0256	-130.22	0	0	0	0	0	<Null>	0	0	0	0	0	<Null>	0	0	0	<Null>	<Null>	<Null>	0	<Null>	0	<Null>	0	<Null>	<Null>	<Null>	<Null>	<Null>	<Null>	<Null>	<Null>	<Null>	<Null>	<Null>	<Null>	Geological Survey of Canada - Pacific
1168	1145	Point	<Null>	<Null>	Canada West Coast	Canada West Coast_1084	<Null>	<Null>	<Null>	0	<Null>	53.9536	-130.181	0	0	0	0	0	<Null>	0	0	0	0	0	<Null>	0	0	0	<Null>	<Null>	<Null>	0	<Null>	0	<Null>	0	<Null>	<Null>	<Null>	<Null>	<Null>	<Null>	<Null>	<Null>	<Null>	<Null>	<Null>	<Null>	Geological Survey of Canada - Pacific
1169	1146	Point	<Null>	<Null>	Canada West Coast	Canada West Coast_1085	<Null>	<Null>	<Null>	0	<Null>	53.7055	-129.075	0	0	0	0	0	<Null>	0	0	0	0	0	<Null>	0	0	0	<Null>	<Null>	<Null>	0	<Null>	0	<Null>	0	<Null>	<Null>	<Null>	<Null>	<Null>	<Null>	<Null>	<Null>	Fjord Seascape - Deltas	<Null>	<Null>	<Null>	Geological Survey of Canada - Pacific
1022	1147	Point	<Null>	<Null>	Canada West Coast	Canada West Coast_1086	<Null>	<Null>	<Null>	0	<Null>	53.4144	-129.412	0	0	0	0	0	<Null>	0	0	0	0	0	<Null>	0	0	0	<Null>	<Null>	<Null>	0	<Null>	0	<Null>	0	<Null>	<Null>	<Null>	<Null>	<Null>	<Null>	<Null>	<Null>	Fjord Seascape - Bedrock sidewall	<Null>	<Null>	<Null>	Geological Survey of Canada - Pacific
1023	1148	Point	<Null>	<Null>	Canada West Coast	Canada West Coast_1087	<Null>	<Null>	<Null>	0	<Null>	53.7726	-128.909	0	0	0	0	0	<Null>	0	0	0	0	0	<Null>	0	0	0	<Null>	<Null>	<Null>	0	<Null>	0	<Null>	0	<Null>	<Null>	<Null>	<Null>	<Null>	<Null>	<Null>	<Null>	Fjord Seascape - Winnowed Scoured Seafloor	<Null>	<Null>	<Null>	Geological Survey of Canada - Pacific
1024	1149	Point	<Null>	<Null>	Canada West Coast	Canada West Coast_1088	<Null>	<Null>	<Null>	0	<Null>	53.7796	-128.884	0	0	0	0	0	<Null>	0	0	0	0	0	<Null>	0	0	0	<Null>	<Null>	<Null>	0	<Null>	0	<Null>	0	<Null>	<Null>	<Null>	<Null>	<Null>	<Null>	<Null>	<Null>	Fjord Seascape - Postglacial Mud	<Null>	<Null>	<Null>	Geological Survey of Canada - Pacific
1025	1150	Point	<Null>	<Null>	Canada West Coast	Canada West Coast_1089	<Null>	<Null>	<Null>	0	<Null>	53.4275	-129.093	0	0	0	0	0	<Null>	0	0	0	0	0	<Null>	0	0	0	<Null>	<Null>	<Null>	0	<Null>	0	<Null>	0	<Null>	<Null>	<Null>	<Null>	<Null>	<Null>	<Null>	<Null>	Fjord Seascape - Unconsolidated sidewall	<Null>	<Null>	<Null>	Geological Survey of Canada - Pacific
1026	1151	Point	<Null>	<Null>	Canada West Coast	Canada West Coast_1090	<Null>	<Null>	<Null>	0	<Null>	53.4886	-129.097	0	0	0	0	0	<Null>	0	0	0	0	0	<Null>	0	0	0	<Null>	<Null>	<Null>	0	<Null>	0	<Null>	0	<Null>	<Null>	<Null>	<Null>	<Null>	<Null>	<Null>	<Null>	Fjord Seascape - Deltas	<Null>	<Null>	<Null>	Geological Survey of Canada - Pacific
1027	1152	Point	<Null>	<Null>	Canada West Coast	Canada West Coast_1091	<Null>	<Null>	<Null>	0	<Null>	53.5039	-129.088	0	0	0	0	0	<Null>	0	0	0	0	0	<Null>	0	0	0	<Null>	<Null>	<Null>	0	<Null>	0	<Null>	0	<Null>	<Null>	<Null>	<Null>	<Null>	<Null>	<Null>	<Null>	Fjord Seascape - Postglacial Mud	<Null>	<Null>	<Null>	Geological Survey of Canada - Pacific
1028	1153	Point	<Null>	<Null>	Canada West Coast	Canada West Coast_1092	<Null>	<Null>	<Null>	0	<Null>	51.1263	-127.14	0	0	0	0	0	<Null>	0	0	0	0	0	<Null>	0	0	0	<Null>	<Null>	<Null>	0	<Null>	0	<Null>	0	<Null>	<Null>	<Null>	<Null>	<Null>	<Null>	<Null>	<Null>	<Null>	<Null>	<Null>	<Null>	Geological Survey of Canada - Pacific
1029	1154	Point	<Null>	<Null>	Canada West Coast	Canada West Coast_1093	<Null>	<Null>	<Null>	0	<Null>	51.1133	-127.051	0	0	0	0	0	<Null>	0	0	0	0	0	<Null>	0	0	0	<Null>	<Null>	<Null>	0	<Null>	0	<Null>	0	<Null>	<Null>	<Null>	<Null>	<Null>	<Null>	<Null>	<Null>	<Null>	<Null>	<Null>	<Null>	Geological Survey of Canada - Pacific
1030	1155	Point	<Null>	<Null>	Canada West Coast	Canada West Coast_1094	<Null>	<Null>	<Null>	0	<Null>	51.0565	-126.978	0	0	0	0	0	<Null>	0	0	0	0	0	<Null>	0	0	0	<Null>	<Null>	<Null>	0	<Null>	0	<Null>	0	<Null>	<Null>	<Null>	<Null>	<Null>	<Null>	<Null>	<Null>	<Null>	<Null>	<Null>	<Null>	Geological Survey of Canada - Pacific
1031	1156	Point	<Null>	<Null>	Canada West Coast	Canada West Coast_1095	<Null>	<Null>	<Null>	0	<Null>	51.0617	-127.022	0	0	0	0	0	<Null>	0	0	0	0	0	<Null>	0	0	0	<Null>	<Null>	<Null>	0	<Null>	0	<Null>	0	<Null>	<Null>	<Null>	<Null>	<Null>	<Null>	<Null>	<Null>	<Null>	<Null>	<Null>	<Null>	Geological Survey of Canada - Pacific
1032	1157	Point	<Null>	<Null>	Canada West Coast	Canada West Coast_1096	<Null>	<Null>	<Null>	0	<Null>	51.3682	-127.128	0	0	0	0	0	<Null>	0	0	0	0	0	<Null>	0	0	0	<Null>	<Null>	<Null>	0	<Null>	0	<Null>	0	<Null>	<Null>	<Null>	<Null>	<Null>	<Null>	<Null>	<Null>	<Null>	<Null>	<Null>	<Null>	Geological Survey of Canada - Pacific
1033	1158	Point	<Null>	<Null>	Canada West Coast	Canada West Coast_1097	<Null>	<Null>	<Null>	0	<Null>	51.3694	-127.114	0	0	0	0	0	<Null>	0	0	0	0	0	<Null>	0	0	0	<Null>	<Null>	<Null>	0	<Null>	0	<Null>	0	<Null>	<Null>	<Null>	<Null>	<Null>	<Null>	<Null>	<Null>	<Null>	<Null>	<Null>	<Null>	Geological Survey of Canada - Pacific
1034	1159	Point	<Null>	<Null>	Canada West Coast	Canada West Coast_1098	<Null>	<Null>	<Null>	0	<Null>	51.3671	-127.114	0	0	0	0	0	<Null>	0	0	0	0	0	<Null>	0	0	0	<Null>	<Null>	<Null>	0	<Null>	0	<Null>	0	<Null>	<Null>	<Null>	<Null>	<Null>	<Null>	<Null>	<Null>	<Null>	<Null>	<Null>	<Null>	Geological Survey of Canada - Pacific
1035	1160	Point	<Null>	<Null>	Canada West Coast	Canada West Coast_1099	<Null>	<Null>	<Null>	0	<Null>	51.371	-127.12	0	0	0	0	0	<Null>	0	0	0	0	0	<Null>	0	0	0	<Null>	<Null>	<Null>	0	<Null>	0	<Null>	0	<Null>	<Null>	<Null>	<Null>	<Null>	<Null>	<Null>	<Null>	<Null>	<Null>	<Null>	<Null>	Geological Survey of Canada - Pacific
1036	1161	Point	<Null>	<Null>	Canada West Coast	Canada West Coast_1100	<Null>	<Null>	<Null>	0	<Null>	51.3624	-127.149	0	0	0	0	0	<Null>	0	0	0	0	0	<Null>	0	0	0	<Null>	<Null>	<Null>	0	<Null>	0	<Null>	0	<Null>	<Null>	<Null>	<Null>	<Null>	<Null>	<Null>	<Null>	<Null>	<Null>	<Null>	<Null>	Geological Survey of Canada - Pacific
1037	1162	Point	<Null>	<Null>	Canada West Coast	Canada West Coast_1101	<Null>	<Null>	<Null>	0	<Null>	51.3638	-127.146	0	0	0	0	0	<Null>	0	0	0	0	0	<Null>	0	0	0	<Null>	<Null>	<Null>	0	<Null>	0	<Null>	0	<Null>	<Null>	<Null>	<Null>	<Null>	<Null>	<Null>	<Null>	<Null>	<Null>	<Null>	<Null>	Geological Survey of Canada - Pacific
1038	1163	Point	<Null>	<Null>	Canada West Coast	Canada West Coast_1102	<Null>	<Null>	<Null>	0	<Null>	51.3634	-127.142	0	0	0	0	0	<Null>	0	0	0	0	0	<Null>	0	0	0	<Null>	<Null>	<Null>	0	<Null>	0	<Null>	0	<Null>	<Null>	<Null>	<Null>	<Null>	<Null>	<Null>	<Null>	<Null>	<Null>	<Null>	<Null>	Geological Survey of Canada - Pacific
1039	1164	Point	<Null>	<Null>	Canada West Coast	Canada West Coast_1103	<Null>	<Null>	<Null>	0	<Null>	51.3631	-127.128	0	0	0	0	0	<Null>	0	0	0	0	0	<Null>	0	0	0	<Null>	<Null>	<Null>	0	<Null>	0	<Null>	0	<Null>	<Null>	<Null>	<Null>	<Null>	<Null>	<Null>	<Null>	<Null>	<Null>	<Null>	<Null>	Geological Survey of Canada - Pacific
1040	1165	Point	<Null>	<Null>	Canada West Coast	Canada West Coast_1104	<Null>	<Null>	<Null>	0	<Null>	51.364	-127.14	0	0	0	0	0	<Null>	0	0	0	0	0	<Null>	0	0	0	<Null>	<Null>	<Null>	0	<Null>	0	<Null>	0	<Null>	<Null>	<Null>	<Null>	<Null>	<Null>	<Null>	<Null>	<Null>	<Null>	<Null>	<Null>	Geological Survey of Canada - Pacific
1041	1166	Point	<Null>	<Null>	Canada West Coast	Canada West Coast_1105	<Null>	<Null>	<Null>	0	<Null>	51.3672	-127.134	0	0	0	0	0	<Null>	0	0	0	0	0	<Null>	0	0	0	<Null>	<Null>	<Null>	0	<Null>	0	<Null>	0	<Null>	<Null>	<Null>	<Null>	<Null>	<Null>	<Null>	<Null>	<Null>	<Null>	<Null>	<Null>	Geological Survey of Canada - Pacific
1042	1167	Point	<Null>	<Null>	Canada West Coast	Canada West Coast_1106	<Null>	<Null>	<Null>	0	<Null>	51.3565	-127.107	0	0	0	0	0	<Null>	0	0	0	0	0	<Null>	0	0	0	<Null>	<Null>	<Null>	0	<Null>	0	<Null>	0	<Null>	<Null>	<Null>	<Null>	<Null>	<Null>	<Null>	<Null>	<Null>	<Null>	<Null>	<Null>	Geological Survey of Canada - Pacific
1043	1168	Point	<Null>	<Null>	Canada West Coast	Canada West Coast_1107	<Null>	<Null>	<Null>	0	<Null>	51.3534	-127.079	0	0	0	0	0	<Null>	0	0	0	0	0	<Null>	0	0	0	<Null>	<Null>	<Null>	0	<Null>	0	<Null>	0	<Null>	<Null>	<Null>	<Null>	<Null>	<Null>	<Null>	<Null>	<Null>	<Null>	<Null>	<Null>	Geological Survey of Canada - Pacific
1044	1169	Point	<Null>	<Null>	Canada West Coast	Canada West Coast_1108	<Null>	<Null>	<Null>	0	<Null>	51.353	-127.098	0	0	0	0	0	<Null>	0	0	0	0	0	<Null>	0	0	0	<Null>	<Null>	<Null>	0	<Null>	0	<Null>	0	<Null>	<Null>	<Null>	<Null>	<Null>	<Null>	<Null>	<Null>	<Null>	<Null>	<Null>	<Null>	Geological Survey of Canada - Pacific
1170	1170	Point	<Null>	<Null>	Canada West Coast	Canada West Coast_1109	<Null>	<Null>	<Null>	0	<Null>	51.3587	-127.156	0	0	0	0	0	<Null>	0	0	0	0	0	<Null>	0	0	0	<Null>	<Null>	<Null>	0	<Null>	0	<Null>	0	<Null>	<Null>	<Null>	<Null>	<Null>	<Null>	<Null>	<Null>	<Null>	<Null>	<Null>	<Null>	Geological Survey of Canada - Pacific
1171	1171	Point	<Null>	<Null>	Canada West Coast	Canada West Coast_1110	<Null>	<Null>	<Null>	0	<Null>	51.3555	-127.155	0	0	0	0	0	<Null>	0	0	0	0	0	<Null>	0	0	0	<Null>	<Null>	<Null>	0	<Null>	0	<Null>	0	<Null>	<Null>	<Null>	<Null>	<Null>	<Null>	<Null>	<Null>	<Null>	<Null>	<Null>	<Null>	Geological Survey of Canada - Pacific
1172	1172	Point	<Null>	<Null>	Canada West Coast	Canada West Coast_1111	<Null>	<Null>	<Null>	0	<Null>	51.3549	-127.149	0	0	0	0	0	<Null>	0	0	0	0	0	<Null>	0	0	0	<Null>	<Null>	<Null>	0	<Null>	0	<Null>	0	<Null>	<Null>	<Null>	<Null>	<Null>	<Null>	<Null>	<Null>	<Null>	<Null>	<Null>	<Null>	Geological Survey of Canada - Pacific
1173	1173	Point	<Null>	<Null>	Canada West Coast	Canada West Coast_1112	<Null>	<Null>	<Null>	0	<Null>	51.3363	-127.169	0	0	0	0	0	<Null>	0	0	0	0	0	<Null>	0	0	0	<Null>	<Null>	<Null>	0	<Null>	0	<Null>	0	<Null>	<Null>	<Null>	<Null>	<Null>	<Null>	<Null>	<Null>	<Null>	<Null>	<Null>	<Null>	Geological Survey of Canada - Pacific
1174	1174	Point	<Null>	<Null>	Canada West Coast	Canada West Coast_1113	<Null>	<Null>	<Null>	0	<Null>	51.3201	-127.201	0	0	0	0	0	<Null>	0	0	0	0	0	<Null>	0	0	0	<Null>	<Null>	<Null>	0	<Null>	0	<Null>	0	<Null>	<Null>	<Null>	<Null>	<Null>	<Null>	<Null>	<Null>	<Null>	<Null>	<Null>	<Null>	Geological Survey of Canada - Pacific
1175	1175	Point	<Null>	<Null>	Canada West Coast	Canada West Coast_1114	<Null>	<Null>	<Null>	0	<Null>	51.3179	-127.207	0	0	0	0	0	<Null>	0	0	0	0	0	<Null>	0	0	0	<Null>	<Null>	<Null>	0	<Null>	0	<Null>	0	<Null>	<Null>	<Null>	<Null>	<Null>	<Null>	<Null>	<Null>	<Null>	<Null>	<Null>	<Null>	Geological Survey of Canada - Pacific
1176	1176	Point	<Null>	<Null>	Canada West Coast	Canada West Coast_1115	<Null>	<Null>	<Null>	0	<Null>	51.3109	-127.21	0	0	0	0	0	<Null>	0	0	0	0	0	<Null>	0	0	0	<Null>	<Null>	<Null>	0	<Null>	0	<Null>	0	<Null>	<Null>	<Null>	<Null>	<Null>	<Null>	<Null>	<Null>	<Null>	<Null>	<Null>	<Null>	Geological Survey of Canada - Pacific
1177	1177	Point	<Null>	<Null>	Canada West Coast	Canada West Coast_1116	<Null>	<Null>	<Null>	0	<Null>	51.3103	-127.214	0	0	0	0	0	<Null>	0	0	0	0	0	<Null>	0	0	0	<Null>	<Null>	<Null>	0	<Null>	0	<Null>	0	<Null>	<Null>	<Null>	<Null>	<Null>	<Null>	<Null>	<Null>	<Null>	<Null>	<Null>	<Null>	Geological Survey of Canada - Pacific
1178	1178	Point	<Null>	<Null>	Canada West Coast	Canada West Coast_1117	<Null>	<Null>	<Null>	0	<Null>	51.3126	-127.203	0	0	0	0	0	<Null>	0	0	0	0	0	<Null>	0	0	0	<Null>	<Null>	<Null>	0	<Null>	0	<Null>	0	<Null>	<Null>	<Null>	<Null>	<Null>	<Null>	<Null>	<Null>	<Null>	<Null>	<Null>	<Null>	Geological Survey of Canada - Pacific
1179	1179	Point	<Null>	<Null>	Canada West Coast	Canada West Coast_1118	<Null>	<Null>	<Null>	0	<Null>	51.3083	-127.23	0	0	0	0	0	<Null>	0	0	0	0	0	<Null>	0	0	0	<Null>	<Null>	<Null>	0	<Null>	0	<Null>	0	<Null>	<Null>	<Null>	<Null>	<Null>	<Null>	<Null>	<Null>	<Null>	<Null>	<Null>	<Null>	Geological Survey of Canada - Pacific
1180	1180	Point	<Null>	<Null>	Canada West Coast	Canada West Coast_1119	<Null>	<Null>	<Null>	0	<Null>	51.3062	-127.238	0	0	0	0	0	<Null>	0	0	0	0	0	<Null>	0	0	0	<Null>	<Null>	<Null>	0	<Null>	0	<Null>	0	<Null>	<Null>	<Null>	<Null>	<Null>	<Null>	<Null>	<Null>	<Null>	<Null>	<Null>	<Null>	Geological Survey of Canada - Pacific
1181	1181	Point	<Null>	<Null>	Canada West Coast	Canada West Coast_1120	<Null>	<Null>	<Null>	0	<Null>	51.3117	-127.231	0	0	0	0	0	<Null>	0	0	0	0	0	<Null>	0	0	0	<Null>	<Null>	<Null>	0	<Null>	0	<Null>	0	<Null>	<Null>	<Null>	<Null>	<Null>	<Null>	<Null>	<Null>	<Null>	<Null>	<Null>	<Null>	Geological Survey of Canada - Pacific
1182	1182	Point	<Null>	<Null>	Canada West Coast	Canada West Coast_1121	<Null>	<Null>	<Null>	0	<Null>	51.3058	-127.246	0	0	0	0	0	<Null>	0	0	0	0	0	<Null>	0	0	0	<Null>	<Null>	<Null>	0	<Null>	0	<Null>	0	<Null>	<Null>	<Null>	<Null>	<Null>	<Null>	<Null>	<Null>	<Null>	<Null>	<Null>	<Null>	Geological Survey of Canada - Pacific
1183	1183	Point	<Null>	<Null>	Canada West Coast	Canada West Coast_1122	<Null>	<Null>	<Null>	0	<Null>	51.3047	-127.249	0	0	0	0	0	<Null>	0	0	0	0	0	<Null>	0	0	0	<Null>	<Null>	<Null>	0	<Null>	0	<Null>	0	<Null>	<Null>	<Null>	<Null>	<Null>	<Null>	<Null>	<Null>	<Null>	<Null>	<Null>	<Null>	Geological Survey of Canada - Pacific
1184	1184	Point	<Null>	<Null>	Canada West Coast	Canada West Coast_1123	<Null>	<Null>	<Null>	0	<Null>	51.3104	-127.245	0	0	0	0	0	<Null>	0	0	0	0	0	<Null>	0	0	0	<Null>	<Null>	<Null>	0	<Null>	0	<Null>	0	<Null>	<Null>	<Null>	<Null>	<Null>	<Null>	<Null>	<Null>	<Null>	<Null>	<Null>	<Null>	Geological Survey of Canada - Pacific
1185	1185	Point	<Null>	<Null>	Canada West Coast	Canada West Coast_1124	<Null>	<Null>	<Null>	0	<Null>	51.2991	-127.277	0	0	0	0	0	<Null>	0	0	0	0	0	<Null>	0	0	0	<Null>	<Null>	<Null>	0	<Null>	0	<Null>	0	<Null>	<Null>	<Null>	<Null>	<Null>	<Null>	<Null>	<Null>	<Null>	<Null>	<Null>	<Null>	Geological Survey of Canada - Pacific
1186	1186	Point	<Null>	<Null>	Canada West Coast	Canada West Coast_1125	<Null>	<Null>	<Null>	0	<Null>	51.2975	-127.283	0	0	0	0	0	<Null>	0	0	0	0	0	<Null>	0	0	0	<Null>	<Null>	<Null>	0	<Null>	0	<Null>	0	<Null>	<Null>	<Null>	<Null>	<Null>	<Null>	<Null>	<Null>	<Null>	<Null>	<Null>	<Null>	Geological Survey of Canada - Pacific
1187	1187	Point	<Null>	<Null>	Canada West Coast	Canada West Coast_1126	<Null>	<Null>	<Null>	0	<Null>	51.3041	-127.254	0	0	0	0	0	<Null>	0	0	0	0	0	<Null>	0	0	0	<Null>	<Null>	<Null>	0	<Null>	0	<Null>	0	<Null>	<Null>	<Null>	<Null>	<Null>	<Null>	<Null>	<Null>	<Null>	<Null>	<Null>	<Null>	Geological Survey of Canada - Pacific
1188	1188	Point	<Null>	<Null>	Canada West Coast	Canada West Coast_1127	<Null>	<Null>	<Null>	0	<Null>	51.296	-127.294	0	0	0	0	0	<Null>	0	0	0	0	0	<Null>	0	0	0	<Null>	<Null>	<Null>	0	<Null>	0	<Null>	0	<Null>	<Null>	<Null>	<Null>	<Null>	<Null>	<Null>	<Null>	<Null>	<Null>	<Null>	<Null>	Geological Survey of Canada - Pacific
1189	1189	Point	<Null>	<Null>	Canada West Coast	Canada West Coast_1128	<Null>	<Null>	<Null>	0	<Null>	51.295	-127.304	0	0	0	0	0	<Null>	0	0	0	0	0	<Null>	0	0	0	<Null>	<Null>	<Null>	0	<Null>	0	<Null>	0	<Null>	<Null>	<Null>	<Null>	<Null>	<Null>	<Null>	<Null>	<Null>	<Null>	<Null>	<Null>	Geological Survey of Canada - Pacific
1190	1190	Point	<Null>	<Null>	Canada West Coast	Canada West Coast_1129	<Null>	<Null>	<Null>	0	<Null>	51.2939	-127.352	0	0	0	0	0	<Null>	0	0	0	0	0	<Null>	0	0	0	<Null>	<Null>	<Null>	0	<Null>	0	<Null>	0	<Null>	<Null>	<Null>	<Null>	<Null>	<Null>	<Null>	<Null>	<Null>	<Null>	<Null>	<Null>	Geological Survey of Canada - Pacific
1191	1191	Point	<Null>	<Null>	Canada West Coast	Canada West Coast_1130	<Null>	<Null>	<Null>	0	<Null>	51.2931	-127.344	0	0	0	0	0	<Null>	0	0	0	0	0	<Null>	0	0	0	<Null>	<Null>	<Null>	0	<Null>	0	<Null>	0	<Null>	<Null>	<Null>	<Null>	<Null>	<Null>	<Null>	<Null>	<Null>	<Null>	<Null>	<Null>	Geological Survey of Canada - Pacific
1192	1192	Point	<Null>	<Null>	Canada West Coast	Canada West Coast_1131	<Null>	<Null>	<Null>	0	<Null>	51.2957	-127.362	0	0	0	0	0	<Null>	0	0	0	0	0	<Null>	0	0	0	<Null>	<Null>	<Null>	0	<Null>	0	<Null>	0	<Null>	<Null>	<Null>	<Null>	<Null>	<Null>	<Null>	<Null>	<Null>	<Null>	<Null>	<Null>	Geological Survey of Canada - Pacific
1193	1193	Point	<Null>	<Null>	Canada West Coast	Canada West Coast_1132	<Null>	<Null>	<Null>	0	<Null>	51.3043	-127.454	0	0	0	0	0	<Null>	0	0	0	0	0	<Null>	0	0	0	<Null>	<Null>	<Null>	0	<Null>	0	<Null>	0	<Null>	<Null>	<Null>	<Null>	<Null>	<Null>	<Null>	<Null>	<Null>	<Null>	<Null>	<Null>	Geological Survey of Canada - Pacific
1194	1194	Point	<Null>	<Null>	Canada West Coast	Canada West Coast_1133	<Null>	<Null>	<Null>	0	<Null>	51.3027	-127.474	0	0	0	0	0	<Null>	0	0	0	0	0	<Null>	0	0	0	<Null>	<Null>	<Null>	0	<Null>	0	<Null>	0	<Null>	<Null>	<Null>	<Null>	<Null>	<Null>	<Null>	<Null>	<Null>	<Null>	<Null>	<Null>	Geological Survey of Canada - Pacific
1195	1195	Point	<Null>	<Null>	Canada West Coast	Canada West Coast_1134	<Null>	<Null>	<Null>	0	<Null>	50.6901	-125.749	0	0	0	0	0	<Null>	0	0	0	0	0	<Null>	0	0	0	<Null>	<Null>	<Null>	0	<Null>	0	<Null>	0	<Null>	<Null>	<Null>	<Null>	<Null>	<Null>	<Null>	<Null>	<Null>	<Null>	<Null>	<Null>	Geological Survey of Canada - Pacific
1196	1196	Point	<Null>	<Null>	Canada West Coast	Canada West Coast_1135	<Null>	<Null>	<Null>	0	<Null>	50.7094	-125.716	0	0	0	0	0	<Null>	0	0	0	0	0	<Null>	0	0	0	<Null>	<Null>	<Null>	0	<Null>	0	<Null>	0	<Null>	<Null>	<Null>	<Null>	<Null>	<Null>	<Null>	<Null>	<Null>	<Null>	<Null>	<Null>	Geological Survey of Canada - Pacific
1197	1197	Point	<Null>	<Null>	Canada West Coast	Canada West Coast_1136	<Null>	<Null>	<Null>	0	<Null>	50.831	-125.677	0	0	0	0	0	<Null>	0	0	0	0	0	<Null>	0	0	0	<Null>	<Null>	<Null>	0	<Null>	0	<Null>	0	<Null>	<Null>	<Null>	<Null>	<Null>	<Null>	<Null>	<Null>	<Null>	<Null>	<Null>	<Null>	Geological Survey of Canada - Pacific
1198	1198	Point	<Null>	<Null>	Canada West Coast	Canada West Coast_1137	<Null>	<Null>	<Null>	0	<Null>	50.835	-125.679	0	0	0	0	0	<Null>	0	0	0	0	0	<Null>	0	0	0	<Null>	<Null>	<Null>	0	<Null>	0	<Null>	0	<Null>	<Null>	<Null>	<Null>	<Null>	<Null>	<Null>	<Null>	<Null>	<Null>	<Null>	<Null>	Geological Survey of Canada - Pacific
1199	1199	Point	<Null>	<Null>	Canada West Coast	Canada West Coast_1138	<Null>	<Null>	<Null>	0	<Null>	50.8732	-125.595	0	0	0	0	0	<Null>	0	0	0	0	0	<Null>	0	0	0	<Null>	<Null>	<Null>	0	<Null>	0	<Null>	0	<Null>	<Null>	<Null>	<Null>	<Null>	<Null>	<Null>	<Null>	<Null>	<Null>	<Null>	<Null>	Geological Survey of Canada - Pacific
1200	1200	Point	<Null>	<Null>	Canada West Coast	Canada West Coast_1139	<Null>	<Null>	<Null>	0	<Null>	50.8996	-125.587	0	0	0	0	0	<Null>	0	0	0	0	0	<Null>	0	0	0	<Null>	<Null>	<Null>	0	<Null>	0	<Null>	0	<Null>	<Null>	<Null>	<Null>	<Null>	<Null>	<Null>	<Null>	<Null>	<Null>	<Null>	<Null>	Geological Survey of Canada - Pacific
1201	1201	Point	<Null>	<Null>	Canada West Coast	Canada West Coast_1140	<Null>	<Null>	<Null>	0	<Null>	50.9149	-125.564	0	0	0	0	0	<Null>	0	0	0	0	0	<Null>	0	0	0	<Null>	<Null>	<Null>	0	<Null>	0	<Null>	0	<Null>	<Null>	<Null>	<Null>	<Null>	<Null>	<Null>	<Null>	<Null>	<Null>	<Null>	<Null>	Geological Survey of Canada - Pacific
1202	1202	Point	<Null>	<Null>	Canada West Coast	Canada West Coast_1141	<Null>	<Null>	<Null>	0	<Null>	51.0551	-125.546	0	0	0	0	0	<Null>	0	0	0	0	0	<Null>	0	0	0	<Null>	<Null>	<Null>	0	<Null>	0	<Null>	0	<Null>	<Null>	<Null>	<Null>	<Null>	<Null>	<Null>	<Null>	<Null>	<Null>	<Null>	<Null>	Geological Survey of Canada - Pacific
1203	1203	Point	<Null>	<Null>	Canada West Coast	Canada West Coast_1142	<Null>	<Null>	<Null>	0	<Null>	51.0426	-125.543	0	0	0	0	0	<Null>	0	0	0	0	0	<Null>	0	0	0	<Null>	<Null>	<Null>	0	<Null>	0	<Null>	0	<Null>	<Null>	<Null>	<Null>	<Null>	<Null>	<Null>	<Null>	<Null>	<Null>	<Null>	<Null>	Geological Survey of Canada - Pacific
1204	1204	Point	<Null>	<Null>	Canada West Coast	Canada West Coast_1143	<Null>	<Null>	<Null>	0	<Null>	51.0393	-125.589	0	0	0	0	0	<Null>	0	0	0	0	0	<Null>	0	0	0	<Null>	<Null>	<Null>	0	<Null>	0	<Null>	0	<Null>	<Null>	<Null>	<Null>	<Null>	<Null>	<Null>	<Null>	<Null>	<Null>	<Null>	<Null>	Geological Survey of Canada - Pacific
1205	1205	Point	<Null>	<Null>	Canada West Coast	Canada West Coast_1144	<Null>	<Null>	<Null>	0	<Null>	51.0496	-125.6	0	0	0	0	0	<Null>	0	0	0	0	0	<Null>	0	0	0	<Null>	<Null>	<Null>	0	<Null>	0	<Null>	0	<Null>	<Null>	<Null>	<Null>	<Null>	<Null>	<Null>	<Null>	<Null>	<Null>	<Null>	<Null>	Geological Survey of Canada - Pacific
1206	1206	Point	<Null>	<Null>	Canada West Coast	Canada West Coast_1145	<Null>	<Null>	<Null>	0	<Null>	51.0532	-125.607	0	0	0	0	0	<Null>	0	0	0	0	0	<Null>	0	0	0	<Null>	<Null>	<Null>	0	<Null>	0	<Null>	0	<Null>	<Null>	<Null>	<Null>	<Null>	<Null>	<Null>	<Null>	<Null>	<Null>	<Null>	<Null>	Geological Survey of Canada - Pacific
[truncated: 60 more rows]
[truncated: 14 more columns]
